# Supplementary material for: Molecular Correlates of Metastasis by Systematic Pan-Cancer Analysis Across The Cancer Genome Atlas
Source: Oxford University Press journal article supplement (doi:10.1158/1541-7786.mcr-18-0601), 2018-11-06
Supplement: 15417786mcr180601-sup-203158_3_supp_5086138_pgcfh5.xlsx [file 15417786mcr180601-sup-203158_3_supp_5086138_pgcfh5.xlsx]

## Sheet: BRCA
								expr	expr	expr
								BRCA	BRCA	BRCA
Composite Element REF	Gene_Symbol	Entrez ID	Chromosome	Genomic_Coordinate	t	p	fdr	t (pos=higher met)	p	FDR
cg27297025	FKRP	79147	19	47259588	-9.00021	1.74e-18	2.47125e-13	-2.05264	0.0403436	0.490395
cg12528056	GPR44	11251	11	60619955	-8.63597	3.33e-17	2.36947e-12	-0.828212	0.40773	0.956662
cg14451382		0	5	1876397	-7.62912	6.98e-14	1.98936e-09	NA	NA	NA
cg08231577	CD58	965	1	117077088	-7.55384	1.2e-13	2.8466e-09	-0.773373	0.439468	0.965046
cg21035402	LRFN3	79414	19	36435543	-7.52934	1.43e-13	2.9064e-09	-0.519977	0.603184	0.987476
cg25308508		0	5	3592638	-7.44839	2.54e-13	4.5187e-09	NA	NA	NA
cg09377855	UBXN6	80700	19	4446336	-7.33402	5.67e-13	7.33761e-09	0.386334	0.699324	0.992085
cg18517898	LRFN3	79414	19	36435675	-7.22284	1.23e-12	1.45396e-08	-0.519977	0.603184	0.987476
cg09187505		0	6	106434429	-7.17456	1.71e-12	1.87002e-08	NA	NA	NA
cg21429725	PIGZ	80235	3	196693809	-7.14253	2.13e-12	2.16167e-08	-2.26956	0.0234269	0.38602
cg26600753	TRIM7	81786	5	180622446	-6.90362	1.06e-11	1.00686e-07	0.481051	0.630576	0.987915
cg00148892	GATA6	2627	18	19780878	-6.86319	1.39e-11	1.23339e-07	1.47074	0.141648	0.768627
cg15427886		0	8	55379663	-6.64055	5.9e-11	4.66935e-07	NA	NA	NA
cg12260643	LRFN3	79414	19	36435669	-6.53444	1.16e-10	8.26416e-07	-0.519977	0.603184	0.987476
cg22365446	MAD1L1	8379	7	1885050	-6.48146	1.62e-10	1.09941e-06	0.968033	0.333241	0.939766
cg09703679		0	5	3592464	-6.45307	1.94e-10	1.25405e-06	NA	NA	NA
cg24625084	KIF7	374654	15	90171885	-6.44687	2.01e-10	1.24694e-06	-1.19765	0.231312	0.877869
cg13082654	PCNT	5116	21	47811350	-6.43001	2.24e-10	1.27467e-06	-0.571809	0.567568	0.982966
cg19814981		0	5	3592435	-6.40259	2.65e-10	1.45411e-06	NA	NA	NA
cg06585708		0	5	3602413	-6.35655	3.53e-10	1.86289e-06	NA	NA	NA
cg08702825		0	Y	8148094	-6.32644	4.25e-10	2.16305e-06	NA	NA	NA
cg01720033	LOC146880	0	17	62777744	-6.28986	5.32e-10	2.52738e-06	NA	NA	NA
cg06365535	TBX4	9496	17	59534102	-6.28863	5.36e-10	2.46442e-06	0.453948	0.649956	0.988825
cg12253469	MPST	4357	22	37420454	-6.2862	5.45e-10	2.42325e-06	0.91582	0.359962	0.946454
cg14417498	LMX1A	4009	1	165322199	-6.18375	1.02e-09	4.25202e-06	-2.16952	0.0302565	0.428179
cg08274544	PTPN21	11099	14	88946041	-6.17248	1.09e-09	4.42129e-06	-1.04514	0.296188	0.924636
cg22263434	KIF7	374654	15	90171846	-6.16348	1.15e-09	4.538e-06	-1.19765	0.231312	0.877869
cg20039443	NFATC2	4773	20	50108912	-6.12954	1.41e-09	5.41374e-06	1.65458	0.0982957	0.688784
cg05000748	RUNX1	861	21	36399146	-6.05011	2.26e-09	8.4619e-06	0.0408223	0.967445	0.996984
cg03928961	PIGZ	80235	3	196693980	-6.04858	2.28e-09	8.32026e-06	-2.26956	0.0234269	0.38602
cg24289821	MTUS2	23281	13	30054557	-6.04667	2.3e-09	8.20428e-06	0.362369	0.717146	0.991326
cg17774559	IRX4	50805	5	1879698	-5.98351	3.34e-09	1.13393e-05	-2.59715	0.00952558	0.234389
cg13912480	KIAA1161	57462	9	34370820	-5.96911	3.64e-09	1.20512e-05	-1.22755	0.219878	0.867473
cg12026967	GATA6	2627	18	19780728	-5.8552	7.05e-09	2.18323e-05	1.47074	0.141648	0.768627
cg05135499		0	10	21798698	-5.77203	1.14e-08	3.36828e-05	NA	NA	NA
cg04567731	TBX4	9496	17	59532519	-5.73208	1.42e-08	4.13875e-05	0.453948	0.649956	0.988825
cg11574055	CD58	965	1	117077116	-5.72331	1.5e-08	4.2621e-05	-0.773373	0.439468	0.965046
cg15676707		0	6	106434396	-5.71352	1.58e-08	4.33093e-05	NA	NA	NA
cg09382127		0	5	3592466	-5.68715	1.83e-08	4.83788e-05	NA	NA	NA
cg03190219		0	7	25898688	-5.68035	1.91e-08	4.93466e-05	NA	NA	NA
cg12222588	BRUNOL4	56853	18	34823808	-5.67615	1.95e-08	4.96207e-05	-0.716177	0.474034	0.971429
cg01295399	SLC18A3;CHAT	6572	10	50820278	-5.63875	2.41e-08	6.0091e-05	0.548239	0.583639	0.985843
cg04228935	RUNX1	861	21	36399258	-5.60326	2.93e-08	7.19391e-05	0.0408223	0.967445	0.996984
cg08113595	USF2	7392	19	35770164	-5.59872	3e-08	7.25206e-05	1.43821	0.150658	0.783911
cg15105326	ZIC4	84107	3	147108916	-5.55957	3.73e-08	8.70795e-05	-0.385354	0.70005	0.991864
cg24419436	UBXN6	80700	19	4446031	-5.55893	3.74e-08	8.59757e-05	0.386334	0.699324	0.992085
cg17873998	NR5A2	2494	1	200117089	-5.55671	3.79e-08	8.5654e-05	1.46809	0.142365	0.769221
cg04180086	IRX4	50805	5	1878499	-5.53397	4.29e-08	9.55404e-05	-2.59715	0.00952558	0.234389
cg11033688	MAD1L1	8379	7	1902804	-5.52616	4.48e-08	9.81848e-05	0.968033	0.333241	0.939766
cg04360793	ELTD1	64123	1	79472361	-5.52313	4.56e-08	9.83126e-05	-2.54055	0.0112045	0.260509
cg27320983	C19orf26	255057	19	1230171	-5.52105	4.61e-08	9.79596e-05	2.14456	0.0322066	0.440984
cg12595013	ZIC1	7545	3	147128123	-5.51845	4.67e-08	9.78979e-05	-0.158353	0.874208	0.991797
cg15084543	ELTD1	64123	1	79472408	-5.51564	4.75e-08	9.79754e-05	-2.54055	0.0112045	0.260509
cg09806671	LMX1A	4009	1	165324679	-5.51145	4.86e-08	9.88148e-05	-2.16952	0.0302565	0.428179
cg18159860		0	5	72678420	-5.50552	5.02e-08	0.000100633	NA	NA	NA
cg09338032		0	12	113916609	-5.50285	5.09e-08	0.000100692	NA	NA	NA
cg25399162	BRUNOL4	56853	18	34824016	-5.4868	5.56e-08	0.000106929	-0.716177	0.474034	0.971429
cg17284236	ZNF490	57474	19	12708001	-5.47093	6.06e-08	0.000115013	-1.48214	0.138589	0.764317
cg02263932	NFATC2	4773	20	50109099	-5.46485	6.26e-08	0.000117312	1.65458	0.0982957	0.688784
cg26422458	ELTD1	64123	1	79472452	-5.42787	7.65e-08	0.000141431	-2.54055	0.0112045	0.260509
cg04244855	PRKAR1B	5575	7	611233	-5.42764	7.66e-08	0.000139795	0.392257	0.694944	0.992057
cg12193929	PCDHA6;PCDHA2;PCDHA1;PCDHA9;PCDHA7;PCDHA5;PCDHA3;PCDHA4;PCDHA10;PCDHA8	56142	5	140237485	-5.42166	7.91e-08	0.000142544	-0.289377	0.772347	0.994393
cg02901753	NR5A2	2494	1	200117055	-5.4079	8.52e-08	0.000151585	1.46809	0.142365	0.769221
cg15466862	SOX1	6656	13	112722333	-5.39393	9.18e-08	0.000159411	-0.548466	0.583483	0.985991
cg14250881	KIAA1161	57462	9	34370781	-5.38478	9.64e-08	0.00016541	-1.22755	0.219878	0.867473
cg23817893	CCDC81	60494	11	86085932	-5.3694	1.05e-07	0.000177463	0.237811	0.812072	0.994573
cg15416279		0	5	3606795	-5.36706	1.06e-07	0.000177575	NA	NA	NA
cg04635983		0	5	3602558	-5.36666	1.06e-07	0.000175893	NA	NA	NA
cg01516076	TAF4	6874	20	60581659	-5.35641	1.12e-07	0.000181556	0.509775	0.610311	0.987884
cg06689045		0	3	120025420	-5.35315	1.14e-07	0.000182665	NA	NA	NA
cg20342460		0	12	52474047	-5.34786	1.17e-07	0.000185802	NA	NA	NA
cg21634993	MGST2	4258	4	140619779	-5.32581	1.32e-07	0.000206612	1.19186	0.233572	0.880502
cg07819160	MPST	4357	22	37420328	-5.32395	1.33e-07	0.00020417	0.91582	0.359962	0.946454
cg17921484	HAPLN4	404037	19	19369327	-5.2945	1.56e-07	0.000236073	-1.66402	0.0963927	0.684929
cg00458878		0	7	27260285	-5.28653	1.63e-07	0.000243616	NA	NA	NA
cg15358549	FBN2	2201	5	127872074	-5.26893	1.78e-07	0.000264482	-0.695231	0.487057	0.972722
cg08288811	PCDHA2;PCDHA1;PCDHA3	56146	5	140180926	-5.26689	1.8e-07	0.00026187	1.12961	0.258888	0.899423
cg11865208	OTUD7A	161725	15	31776741	-5.26549	1.82e-07	0.000261149	-0.587579	0.556936	0.98202
cg16508068	HHEX	3087	10	94451736	-5.26081	1.86e-07	0.000264964	2.26394	0.0237716	0.386666
cg14823851	TBX4	9496	17	59532306	-5.24855	1.98e-07	0.000279769	0.453948	0.649956	0.988825
cg12877723	PENK	5179	8	57358312	-5.2168	2.34e-07	0.000327018	-0.901003	0.367784	0.948909
cg27444899	RAB11FIP3	9727	16	565493	-5.2131	2.39e-07	0.000326969	0.88469	0.376517	0.95418
cg23889730	PRIMA1	145270	14	94254131	-5.20686	2.47e-07	0.000331396	-2.20327	0.0277821	0.413081
cg07961015		0	5	1876215	-5.19561	2.62e-07	0.000348075	NA	NA	NA
cg11334165		0	5	145758782	-5.18919	2.7e-07	0.000356525	NA	NA	NA
cg08658787		0	12	113916646	-5.17805	2.86e-07	0.000374255	NA	NA	NA
cg14223293		0	5	3602272	-5.17403	2.92e-07	0.000378651	NA	NA	NA
cg22626168	LRRK1	79705	15	101513246	-5.17207	2.95e-07	0.000379076	0.129919	0.896655	0.990247
cg24220749	DAAM2	23500	6	39869799	-5.15159	3.28e-07	0.000417593	-0.63975	0.522468	0.979223
cg22694818	LHX8	431707	1	75595970	-5.13872	3.51e-07	0.000442263	-0.304994	0.760428	0.993832
cg24371425	PTCHD2	57540	1	11561497	-5.13284	3.62e-07	0.000451832	-0.625298	0.531905	0.979683
cg24672056	SSBP3	23648	1	54723730	-5.12892	3.69e-07	0.000457016	1.83526	0.0667371	0.609055
cg21982950		0	5	1876200	-5.11032	4.06e-07	0.000494147	NA	NA	NA
cg23919038	ADARB1	104	21	46554352	-5.10855	4.1e-07	0.000494427	-2.69644	0.00711559	0.19499
cg04692403	TCF21	6943	6	134210812	-5.10729	4.12e-07	0.000493431	9.53964	8.88124e-21	9.46599e-18
cg09765089		0	7	27291346	-5.1053	4.17e-07	0.000494326	NA	NA	NA
cg05375100	RAB11FIP3	9727	16	565623	-5.10261	4.22e-07	0.000497032	0.88469	0.376517	0.95418
cg16965936	PRDM15	63977	21	43255477	-5.09007	4.5e-07	0.000525579	-0.409751	0.682068	0.991
cg00709966		0	7	27253143	-5.07968	4.75e-07	0.000549638	NA	NA	NA
cg04093645	FBN2	2201	5	127872037	-5.0789	4.77e-07	0.000547373	-0.695231	0.487057	0.972722
cg02224314	BCL11B	64919	14	99641151	-5.07527	4.86e-07	0.000553142	-0.36273	0.716877	0.991427
cg17838420	IRX4	50805	5	1877906	-5.05377	5.42e-07	0.000612049	-2.59715	0.00952558	0.234389
cg09887059		0	12	113916664	-5.02938	6.13e-07	0.000686999	NA	NA	NA
cg03330762	TRPM4	54795	19	49686116	-5.01506	6.59e-07	0.000726971	-1.21559	0.224401	0.872401
cg03371669	HOXD12	3238	2	176965435	-5.00833	6.81e-07	0.000746235	7.13243	1.78443e-12	7.6886e-10
cg05668996	PRDM6	93166	5	122431419	-4.98718	7.58e-07	0.00082351	-2.4961	0.0127023	0.281439
cg10759602	FOXF2	2295	6	1393675	-4.98671	7.59e-07	0.000819196	-4.92228	9.86161e-07	0.000163695
cg18172877	IRX4	50805	5	1878672	-4.97625	8e-07	0.000856777	-2.59715	0.00952558	0.234389
cg20597403	SDK1	221935	7	4305042	-4.97456	8.07e-07	0.000857585	0.367509	0.71331	0.991166
cg16138910	PTCHD2	57540	1	11562134	-4.96342	8.53e-07	0.000899948	-0.625298	0.531905	0.979683
cg18857768	OBSCN	84033	1	228503801	-4.93163	9.99e-07	0.00103887	0.424448	0.671322	0.992187
cg13951490	PCDHGA4;PCDHGA9;PCDHGA1;PCDHGB1;PCDHGB7;PCDHGB6;PCDHGA11;PCDHGB3;PCDHGA6;PCDHGA8;PCDHGA10;PCDHGA5;PCDHGB4;PCDHGA3;PCDHGA2;PCDHGA7;PCDHGB2;PCDHGB5	56111	5	140799290	-4.90636	1.13e-06	0.00116882	-0.904295	0.366037	0.948633
cg14191673		0	9	33019956	-4.90115	1.16e-06	0.00119064	NA	NA	NA
cg06655810		0	7	27260102	-4.89923	1.17e-06	0.00119337	NA	NA	NA
cg10374009		0	11	44341361	-4.88789	1.24e-06	0.00125307	NA	NA	NA
cg25356886	CRYGD	1421	2	208988967	-4.87214	1.34e-06	0.00134446	7.46265	1.71873e-13	9.15948e-11
cg09465142	NFATC2	4773	20	50109375	-4.87023	1.35e-06	0.00134759	1.65458	0.0982957	0.688784
cg03717151	SOBP	55084	6	107956627	-4.85888	1.43e-06	0.00141486	-1.7612	0.0784819	0.639058
cg15712323	ELAVL3	1995	19	11565399	-4.85543	1.46e-06	0.00142909	-0.596617	0.550886	0.982041
cg18029321	PCDHA6;PCDHA2;PCDHA1;PCDHA7;PCDHA5;PCDHA9;PCDHA3;PCDHA4;PCDHA8	56142	5	140230326	-4.85228	1.48e-06	0.00144129	-0.289377	0.772347	0.994393
cg25683963	OBSL1	23363	2	220420917	-4.85059	1.49e-06	0.00144341	1.84896	0.0647319	0.601324
cg20192747		0	18	44774846	-4.84497	1.53e-06	0.00147362	NA	NA	NA
cg07224469	PCGF3	10336	4	716282	-4.83628	1.6e-06	0.00151701	0.357312	0.720927	0.992218
cg07931792	ZNF490	57474	19	12707809	-4.82891	1.66e-06	0.00156204	-1.48214	0.138589	0.764317
cg02452586	KIAA1804	0	1	233497903	-4.81894	1.74e-06	0.00159742	NA	NA	NA
cg24063645	ADARB1	104	21	46553953	-4.80752	1.84e-06	0.00167781	-2.69644	0.00711559	0.19499
cg24154839	GABRA4	2557	4	46995741	-4.8055	1.86e-06	0.0016835	-0.466804	0.640733	0.988984
cg15310492	KCNA4	3739	11	30038677	-4.8017	1.89e-06	0.00170402	0.238125	0.811829	0.994696
cg17598999		0	5	72676550	-4.79946	1.91e-06	0.00171179	NA	NA	NA
cg24903144	PAX2	5076	10	102509268	-4.78055	2.09e-06	0.00186409	-0.00615083	0.995093	0.999784
cg11498607	RUNX1	861	21	36399226	-4.7683	2.22e-06	0.00196531	0.0408223	0.967445	0.996984
cg15518950	TMEM171	134285	5	72415770	-4.75334	2.39e-06	0.00209894	0.614315	0.539134	0.980689
cg00487187	HHEX	3087	10	94451625	-4.73559	2.6e-06	0.00224408	2.26394	0.0237716	0.386666
cg00232387	DIRAS1	148252	19	2717526	-4.72559	2.73e-06	0.00233993	-2.70068	0.00702606	0.193322
cg16729538	CHST5	23563	16	75563280	-4.72486	2.74e-06	0.00233408	-1.35928	0.174336	0.82238
cg24922090	PCDHGA4;PCDHGB3;PCDHGA1;PCDHGA5;PCDHGB1;PCDHGA3;PCDHGA2;PCDHGB2	56111	5	140751608	-4.72415	2.75e-06	0.00232806	-0.904295	0.366037	0.948633
cg24533466	SSBP3	23648	1	54724018	-4.71928	2.81e-06	0.00236871	1.83526	0.0667371	0.609055
cg12360330	CENPJ	55835	13	25469387	-4.71801	2.83e-06	0.00236913	1.11033	0.267101	0.905432
cg19772897	C18orf1	753	18	13263188	-4.71332	2.89e-06	0.00240858	-1.61678	0.106212	0.707068
cg13738144	PRDM13	59336	6	100054723	-4.71245	2.9e-06	0.00240455	-0.302263	0.762509	0.993857
cg21230493	ADRA1A	148	8	26722496	-4.71243	2.9e-06	0.00239088	5.36632	9.79559e-08	2.04506e-05
cg01519253		0	12	114886463	-4.71098	2.92e-06	0.00239367	NA	NA	NA
cg11941060		0	3	133502564	-4.70716	2.98e-06	0.00242368	NA	NA	NA
cg12765972	ADAD1	132612	4	123300510	-4.70288	3.04e-06	0.00245956	-0.463888	0.64282	0.988664
cg16768018	ZIC4	84107	3	147108843	-4.70221	3.05e-06	0.00245349	-0.385354	0.70005	0.991864
cg10795659	TMEM171	134285	5	72415998	-4.70186	3.05e-06	0.00244375	0.614315	0.539134	0.980689
cg07214164		0	2	105480254	-4.69727	3.12e-06	0.00248386	NA	NA	NA
cg05057910		0	7	27260441	-4.69221	3.2e-06	0.00253013	NA	NA	NA
cg13293246	BIN1	274	2	127818101	-4.68399	3.33e-06	0.00261634	0.932717	0.351171	0.947703
cg00218215		0	10	3500567	-4.67442	3.48e-06	0.00270789	NA	NA	NA
cg06084403	NCK2	8440	2	106498295	-4.67295	3.5e-06	0.00271201	-1.27382	0.202995	0.855894
cg23051598	ATXN2L	11273	16	28834567	-4.66917	3.57e-06	0.00274606	2.19976	0.0280315	0.414657
cg17886399		0	3	62362660	-4.6659	3.62e-06	0.00277382	NA	NA	NA
cg09390001	KIAA1024	23251	15	79725642	-4.66579	3.62e-06	0.0027605	-1.42915	0.153246	0.788459
cg01061520		0	Y	9478342	-4.66337	3.67e-06	0.00277745	NA	NA	NA
cg09048251		0	5	77253974	-4.65682	3.78e-06	0.0028495	NA	NA	NA
cg18901085		0	19	12228445	-4.65445	3.82e-06	0.00286644	NA	NA	NA
cg14235768	VAX2	25806	2	71132250	-4.65425	3.83e-06	0.00285413	0.0088896	0.992909	0.999473
cg14083603	ZGPAT	84619	20	62366419	-4.6538	3.84e-06	0.00284532	0.129583	0.89692	0.990108
cg25741487		0	3	62363076	-4.6451	4e-06	0.00293388	NA	NA	NA
cg27100236	GATA4	2626	8	11561458	-4.64334	4.03e-06	0.00294316	3.63244	0.000293694	0.0201613
cg07080556	FLJ39653	0	4	16258213	-4.64108	4.07e-06	0.00295947	NA	NA	NA
cg09496748	ANKRD44	91526	2	198029215	-4.63049	4.28e-06	0.00309473	1.71045	0.0874649	0.663638
cg27048432	GPR39;LYPD1	2863	2	133403009	-4.62492	4.39e-06	0.00316071	-2.35819	0.0185387	0.346335
cg19131736	MAD1L1	8379	7	1902888	-4.6247	4.4e-06	0.00314815	0.968033	0.333241	0.939766
cg21217129	ADARB1	104	21	46554127	-4.62356	4.42e-06	0.00314916	-2.69644	0.00711559	0.19499
cg12610207	TBX5	6910	12	114833950	-4.62213	4.45e-06	0.00315461	-4.41615	1.10382e-05	0.00134659
cg16930254	AGPAT3	56894	21	45393416	-4.61942	4.51e-06	0.00317913	-0.410155	0.681772	0.991139
cg04738965	ZIC1	7545	3	147127662	-4.61281	4.65e-06	0.00326295	-0.158353	0.874208	0.991797
cg12190994	SDK1	221935	7	4305061	-4.6127	4.65e-06	0.00324873	0.367509	0.71331	0.991166
cg02947450		0	10	22766861	-4.6079	4.76e-06	0.0033063	NA	NA	NA
cg09639151	PCDHGA4;PCDHGA11;PCDHGA9;PCDHGA1;PCDHGB1;PCDHGB6;PCDHGA12;PCDHGB3;PCDHGB7;PCDHGA6;PCDHGA8;PCDHGA10;PCDHGA5;PCDHGB4;PCDHGA3;PCDHGA2;PCDHGA7;PCDHGB2;PCDHGB5	56111	5	140810920	-4.60204	4.89e-06	0.00336529	-0.904295	0.366037	0.948633
cg07369404		0	3	120026159	-4.59528	5.05e-06	0.00345659	NA	NA	NA
cg08940787	LOC146880	0	17	62777648	-4.59417	5.07e-06	0.00345791	NA	NA	NA
cg10977667		0	16	31053799	-4.58888	5.2e-06	0.00352739	NA	NA	NA
cg24112091		0	11	69683619	-4.57303	5.6e-06	0.00376168	NA	NA	NA
cg12350325	CACNA1C	775	12	2800909	-4.57173	5.63e-06	0.00376668	-1.43058	0.152833	0.788141
cg08397344	FNDC1	84624	6	159589874	-4.5708	5.66e-06	0.00376529	-2.68206	0.00742667	0.200798
cg21915313	PCDHGA4;PCDHGA6;PCDHGA1;PCDHGA5;PCDHGB1;PCDHGB4;PCDHGA3;PCDHGA2;PCDHGA8;PCDHGA7;PCDHGB2;PCDHGB3	56111	5	140774426	-4.57078	5.66e-06	0.00374818	-0.904295	0.366037	0.948633
cg08890883	SH2D3A	10045	19	6752577	-4.56945	5.69e-06	0.00375394	-2.41931	0.0157114	0.313779
cg00986350	ZFPM1	161882	16	88540396	-4.56419	5.83e-06	0.00382898	0.392412	0.69483	0.992173
cg25222493	OBSCN	84033	1	228509564	-4.56391	5.84e-06	0.0038163	0.424448	0.671322	0.992187
cg13948652	MYO16	23026	13	109792494	-4.56125	5.91e-06	0.00384613	1.19619	0.231879	0.879031
cg10930664	HTRA3	94031	4	8307813	-4.55902	5.98e-06	0.00385096	-2.63935	0.00842386	0.216213
cg04064644		0	5	1876719	-4.55348	6.13e-06	0.00393326	NA	NA	NA
cg26037170	OBSCN	84033	1	228504579	-4.551	6.2e-06	0.0039609	0.424448	0.671322	0.992187
cg04742135	FGFR3	2261	4	1800154	-4.54748	6.3e-06	0.00400787	-0.913013	0.361436	0.947255
cg25535789	MLLT1	4298	19	6211926	-4.54334	6.43e-06	0.00406719	1.13435	0.256896	0.898982
cg13524919		0	21	34396506	-4.54305	6.43e-06	0.0040547	NA	NA	NA
cg20413392	MIR219-2	407003	9	131155013	-4.54271	6.44e-06	0.00404303	NA	NA	NA
cg16491960		0	7	56297490	-4.54182	6.47e-06	0.00404197	NA	NA	NA
cg21887309	PCDHA6;PCDHA2;PCDHA1;PCDHA5;PCDHA3;PCDHA4	56142	5	140209490	-4.5351	6.68e-06	0.00415107	-0.289377	0.772347	0.994393
cg13719412		0	10	134019615	-4.53332	6.73e-06	0.00416715	NA	NA	NA
cg22327646		0	12	114878570	-4.53008	6.83e-06	0.00421154	NA	NA	NA
cg13055278	ID2	3398	2	8822288	-4.52961	6.85e-06	0.00420253	0.472221	0.636862	0.989877
cg12174280		0	8	7543899	-4.52526	6.99e-06	0.00425099	NA	NA	NA
cg11979303		0	6	1379795	-4.52035	7.14e-06	0.00432967	NA	NA	NA
cg00592781		0	12	66122874	-4.51642	7.28e-06	0.00438991	NA	NA	NA
cg15834072	DCHS2	54798	4	155411603	-4.50941	7.51e-06	0.00451445	-1.80263	0.0717201	0.621749
cg02590401	CYTH2	9266	19	48984071	-4.49778	7.93e-06	0.00474194	-1.35089	0.177007	0.825367
cg09062198	CLSTN1	22883	1	9822623	-4.49575	8e-06	0.00476621	-0.923635	0.355879	0.947528
cg16742873	NKX3-2	579	4	13544632	-4.4956	8e-06	0.00474959	-3.88614	0.000107935	0.00877827
cg19802138	SOX1	6656	13	112722719	-4.49513	8.02e-06	0.00473998	-0.548466	0.583483	0.985991
cg22507154		0	1	91185233	-4.49001	8.21e-06	0.00481251	NA	NA	NA
cg00184452	DMRTA2	63950	1	50887477	-4.48884	8.26e-06	0.00481842	-0.571815	0.567564	0.983043
cg04851505		0	1	37783871	-4.48631	8.35e-06	0.00485468	NA	NA	NA
cg07135032	LMX1A	4009	1	165322099	-4.4839	8.44e-06	0.0048686	-2.16952	0.0302565	0.428179
cg13647536		0	7	27260466	-4.48356	8.46e-06	0.00485664	NA	NA	NA
cg08858466	SFMBT2	57713	10	7409783	-4.48023	8.59e-06	0.00491122	0.700511	0.483757	0.973232
cg07142285	APCDD1L	164284	20	57042703	-4.4802	8.59e-06	0.00489208	-3.0023	0.00274002	0.101256
cg25021695	OBSCN	84033	1	228504761	-4.4762	8.75e-06	0.00494269	0.424448	0.671322	0.992187
cg21970789		0	5	134826388	-4.46873	9.05e-06	0.00509379	NA	NA	NA
cg17980283		0	2	45156642	-4.46439	9.23e-06	0.00517512	NA	NA	NA
cg16705627	SOX1	6656	13	112721950	-4.45844	9.48e-06	0.0052962	-0.548466	0.583483	0.985991
cg00037457		0	17	59531744	-4.45789	9.51e-06	0.00528857	NA	NA	NA
cg01290710	HIPK4	147746	19	40889978	-4.45672	9.56e-06	0.00529617	0.363824	0.716059	0.991719
cg18302899	MKNK2	2872	19	2038600	-4.4441	1.01e-05	0.00556514	0.505522	0.613294	0.987737
cg13936863	VAX2	25806	2	71132246	-4.44325	1.02e-05	0.00556505	0.0088896	0.992909	0.999473
cg25828259		0	2	47918397	-4.44041	1.03e-05	0.00561553	NA	NA	NA
cg11738976	JPH2	57158	20	42744590	-4.43997	1.03e-05	0.00560545	-2.68451	0.00737281	0.199608
cg23681599	DIP2C	22982	10	711944	-4.43893	1.04e-05	0.0056104	0.126883	0.899056	0.989822
cg13717446	LOC146880	0	17	62777761	-4.43635	1.05e-05	0.00565491	NA	NA	NA
cg26687072	HOXB1	3211	17	46608345	-4.43418	1.06e-05	0.00568897	1.0395	0.298799	0.92551
cg25007781	C14orf80	283643	14	105963610	-4.43285	1.07e-05	0.00570195	-0.807247	0.419699	0.960483
cg12482860		0	2	47918413	-4.43212	1.07e-05	0.00569932	NA	NA	NA
cg20457275	FOXF2	2295	6	1394071	-4.43075	1.08e-05	0.00571339	-4.92228	9.86161e-07	0.000163695
cg00959431		0	9	79638117	-4.42914	1.08e-05	0.00573381	NA	NA	NA
cg00460049	SGIP1	84251	1	66998806	-4.42911	1.08e-05	0.00571316	-5.37352	9.42171e-08	1.98749e-05
cg07539798	PCDHGA4;PCDHGA11;PCDHGA9;PCDHGA1;PCDHGB1;PCDHGB6;PCDHGA12;PCDHGB3;PCDHGB7;PCDHGA6;PCDHGA8;PCDHGA10;PCDHGA5;PCDHGB4;PCDHGA3;PCDHGA2;PCDHGA7;PCDHGB2;PCDHGB5	56111	5	140811312	-4.42517	1.1e-05	0.00579434	-0.904295	0.366037	0.948633
cg25397636	MAD1L1	8379	7	1896220	-4.42426	1.11e-05	0.00579701	0.968033	0.333241	0.939766
cg04554929		0	8	105342491	-4.42198	1.12e-05	0.00583556	NA	NA	NA
cg14754787	LHX1	3975	17	35299600	-4.42196	1.12e-05	0.00581468	0.639229	0.522807	0.979223
cg14739859		0	5	145758710	-4.41727	1.14e-05	0.00589586	NA	NA	NA
cg19165390		0	18	56932082	-4.41718	1.14e-05	0.00587714	NA	NA	NA
cg04224064		0	14	36992233	-4.41654	1.15e-05	0.00587291	NA	NA	NA
cg04891961	ANKRD13B	124930	17	27939900	-4.4149	1.15e-05	0.00589514	-1.07368	0.2832	0.917907
cg03866607	TBX4	9496	17	59532826	-4.41436	1.16e-05	0.00588848	0.453948	0.649956	0.988825
cg26728517		0	20	39319540	-4.41401	1.16e-05	0.0058768	NA	NA	NA
cg06264663	LATS2	26524	13	21563415	-4.41368	1.16e-05	0.00586479	-0.550188	0.582302	0.985229
cg13966609	DSCAML1	57453	11	117352730	-4.41287	1.17e-05	0.00586546	0.422226	0.672943	0.991398
cg05674437	PIGZ	80235	3	196694153	-4.41182	1.17e-05	0.00585188	-2.26956	0.0234269	0.38602
cg19246080	ARSD	414	X	2825439	-4.41125	1.17e-05	0.0058464	0.454023	0.649902	0.989115
cg12717963	TRIM7	81786	5	180622179	-4.40873	1.19e-05	0.00589238	0.481051	0.630576	0.987915
cg02974976	CD58	965	1	117077219	-4.4032	1.22e-05	0.00599903	-0.773373	0.439468	0.965046
cg16572603	PCDHGA2;PCDHGA3;PCDHGA1	56113	5	140725235	-4.40294	1.22e-05	0.00598537	0.107824	0.914155	0.99162
cg10477621	FERD3L	222894	7	19184950	-4.39676	1.25e-05	0.00613299	-0.850146	0.395429	0.955018
cg26301689	PAQR9	344838	3	142681704	-4.39156	1.28e-05	0.00625615	5.88099	5.4045e-09	1.42138e-06
cg04467618	TCF21	6943	6	134210946	-4.39074	1.29e-05	0.00625789	9.53964	8.88124e-21	9.46599e-18
cg09155145		0	5	1875188	-4.38838	1.3e-05	0.00630291	NA	NA	NA
cg18501409	ADARB1	104	21	46553607	-4.388	1.3e-05	0.00629236	-2.69644	0.00711559	0.19499
cg24178740	FEV	54738	2	219850465	-4.38793	1.3e-05	0.00627317	0.000286844	0.999771	1.00027
cg01178680	ISLR2	57611	15	74425552	-4.38652	1.31e-05	0.00629156	0.369297	0.711978	0.991218
cg16546442	PITX2	5308	4	111539907	-4.38533	1.32e-05	0.00630385	-2.22952	0.0259806	0.400405
cg20014094	PLEKHM2	23207	1	16053725	-4.38483	1.32e-05	0.0062971	-0.330339	0.741207	0.993
cg05690644	GDF6	392255	8	97158015	-4.37818	1.36e-05	0.00646561	-0.830936	0.40619	0.956817
cg06654549		0	5	1875058	-4.37641	1.37e-05	0.0064956	NA	NA	NA
cg14431476		0	3	113822413	-4.37566	1.38e-05	0.00649574	NA	NA	NA
cg08039116	HECW1	23072	7	43152254	-4.36922	1.42e-05	0.00664137	1.78603	0.0743693	0.628308
cg13649728	SLC25A31	83447	4	128651707	-4.36489	1.45e-05	0.00674897	0.889412	0.373976	0.952029
cg11429969	PCDHA2;PCDHA1;PCDHA3	56146	5	140180921	-4.36457	1.45e-05	0.0067365	1.12961	0.258888	0.899423
cg23517116		0	8	65499841	-4.36162	1.47e-05	0.00680367	NA	NA	NA
cg07561894	SSBP4	170463	19	18540208	-4.35943	1.48e-05	0.00684811	1.23438	0.217323	0.863791
cg25051331		0	5	77253833	-4.35476	1.51e-05	0.00696951	NA	NA	NA
cg08217411		0	2	210010193	-4.35339	1.52e-05	0.00698929	NA	NA	NA
cg12541454		0	4	174437915	-4.35167	1.53e-05	0.00702053	NA	NA	NA
cg01157467	CDK10	8558	16	89761017	-4.34836	1.56e-05	0.00710196	0.839951	0.401119	0.956553
cg04513912		0	7	156409788	-4.34769	1.56e-05	0.00710029	NA	NA	NA
cg09353251	GPR39	2863	2	133343373	-4.34749	1.56e-05	0.00708402	-2.35819	0.0185387	0.346335
cg02743950	FKRP	79147	19	47260132	-4.3408	1.61e-05	0.00725149	-2.05264	0.0403436	0.490395
cg14472366		0	13	20875915	-4.33525	1.65e-05	0.00740898	NA	NA	NA
cg18343437		0	8	142528415	-4.3343	1.66e-05	0.00741694	NA	NA	NA
cg26014373	OLFML2A	169611	9	127572640	-4.32716	1.71e-05	0.00760783	-2.95024	0.0032425	0.116219
cg02433671	RGL3	57139	19	11529856	-4.3269	1.71e-05	0.00759273	0.366901	0.713763	0.991115
cg01891252		0	1	50881219	-4.32682	1.71e-05	0.00757198	NA	NA	NA
cg06599322	WIZ	58525	19	15538978	-4.32414	1.73e-05	0.00763861	-0.279733	0.779735	0.993858
cg09337248	VSTM2L	128434	20	36572562	-4.32358	1.74e-05	0.00763385	-0.690673	0.489917	0.972772
cg18261877	OBSCN	84033	1	228468281	-4.32231	1.75e-05	0.00765321	0.424448	0.671322	0.992187
cg12409982		0	3	137489312	-4.32046	1.76e-05	0.00769238	NA	NA	NA
cg22268467	SH3GL1	6455	19	4361713	-4.31694	1.79e-05	0.00778931	-0.51442	0.607062	0.987597
cg25339566	TCTEX1D1	200132	1	67218165	-4.31474	1.81e-05	0.00784163	-3.52591	0.000439406	0.0271293
cg00217953	SEMA4C	54910	2	97527635	-4.31323	1.82e-05	0.00786987	1.114	0.265523	0.904323
cg17916432	CRYGD	1421	2	208989209	-4.30824	1.86e-05	0.00802079	7.46265	1.71873e-13	9.15948e-11
cg01415995	GAL3ST3	89792	11	65811095	-4.30783	1.86e-05	0.00801123	1.60374	0.109059	0.713819
cg16108230		0	6	117584815	-4.30711	1.87e-05	0.00801241	NA	NA	NA
cg04400841	CRYGD	1421	2	208988863	-4.30586	1.88e-05	0.0080324	7.46265	1.71873e-13	9.15948e-11
cg06939603	CYTH3	9265	7	6205417	-4.30325	1.9e-05	0.00810129	-1.16657	0.243639	0.889477
cg11423630		0	9	93879726	-4.30175	1.91e-05	0.00813059	NA	NA	NA
cg07352967		0	7	57076741	-4.30103	1.92e-05	0.0081322	NA	NA	NA
cg21706038	TSSC1	7260	2	3317693	-4.30006	1.93e-05	0.00814276	-0.749945	0.453448	0.966608
cg05756220	KCNA4	3739	11	30038685	-4.29757	1.95e-05	0.00820833	0.238125	0.811829	0.994696
cg14009075	MPPED1	758	22	43807401	-4.28875	2.03e-05	0.00850791	0.640525	0.521965	0.979458
cg05756918		0	7	27253707	-4.2878	2.03e-05	0.00851828	NA	NA	NA
cg13667739	CRIP2	1397	14	105944604	-4.28505	2.06e-05	0.00859671	-0.260289	0.79469	0.993166
cg00575066		0	6	10390039	-4.2826	2.08e-05	0.00866417	NA	NA	NA
cg16962008	C7orf57	136288	7	48075950	-4.28253	2.08e-05	0.00864178	0.0998037	0.920518	0.992462
cg05740045		0	8	65499926	-4.28203	2.09e-05	0.00863525	NA	NA	NA
cg07116312	ACSF3	197322	16	89173855	-4.28151	2.09e-05	0.00863007	0.979884	0.327359	0.935027
cg11244672	YJEFN3	374887	19	19639970	-4.27917	2.11e-05	0.00869399	0.4534	0.65035	0.988682
cg04367345	ALX4	60529	11	44332636	-4.27863	2.12e-05	0.00868954	-0.327898	0.743051	0.993171
cg10846328	BIN1	274	2	127818131	-4.27782	2.12e-05	0.00869538	0.932717	0.351171	0.947703
cg26991571	PCDHB9	56127	5	140568535	-4.27654	2.14e-05	0.0087191	-1.80891	0.0707379	0.619599
cg16561266	LOC146880	0	17	62777777	-4.27462	2.15e-05	0.00876784	NA	NA	NA
cg05435882		0	16	88311214	-4.27357	2.16e-05	0.00878302	NA	NA	NA
cg18621142		0	10	21788638	-4.27348	2.17e-05	0.00876155	NA	NA	NA
cg14265704	VAX2	25806	2	71131201	-4.27203	2.18e-05	0.00879268	0.0088896	0.992909	0.999473
cg14977059		0	22	20640332	-4.27039	2.2e-05	0.00883088	NA	NA	NA
cg09258804	TBX4	9496	17	59532564	-4.27021	2.2e-05	0.00881303	0.453948	0.649956	0.988825
cg14459021	EHMT1	79813	9	140683212	-4.26991	2.2e-05	0.00879987	0.215413	0.829485	0.992139
cg20187526		0	3	99944116	-4.26823	2.22e-05	0.00883985	NA	NA	NA
cg20098710	YJEFN3	374887	19	19640075	-4.26716	2.23e-05	0.00885668	0.4534	0.65035	0.988682
cg00200408		0	2	132585607	-4.2647	2.25e-05	0.00892757	NA	NA	NA
cg16840358		0	3	27765484	-4.25936	2.3e-05	0.0091131	NA	NA	NA
cg16391955		0	1	50881185	-4.25337	2.36e-05	0.00930295	NA	NA	NA
cg18547371	SSBP4	170463	19	18539843	-4.25212	2.38e-05	0.00932817	1.23438	0.217323	0.863791
cg12765028		0	4	13526659	-4.24956	2.4e-05	0.00938095	NA	NA	NA
cg19378036	HNF1B	6928	17	36105364	-4.24597	2.44e-05	0.00947732	2.00736	0.0449554	0.512897
cg07547765	HOXB7	3217	17	46685448	-4.24007	2.51e-05	0.00969757	-2.66946	0.00770921	0.204078
cg04198125		0	7	157211777	-4.23925	2.51e-05	0.00970571	NA	NA	NA
cg02268584	OBSCN	84033	1	228467995	-4.23418	2.57e-05	0.00989536	0.424448	0.671322	0.992187
cg20818528	SMTNL2	342527	17	4510743	-4.23414	2.57e-05	0.00987019	1.52867	0.126634	0.747004
cg02336143	PCDHGB4;PCDHGA4;PCDHGA6;PCDHGA1;PCDHGA5;PCDHGB1;PCDHGA3;PCDHGA2;PCDHGA7;PCDHGB2;PCDHGB3	8641	5	140769170	-4.23192	2.6e-05	0.00991275	0.273418	0.784583	0.99428
cg10265740	ZNF167	55888	3	44622865	-4.2273	2.65e-05	0.0100865	-1.06295	0.288037	0.921054
cg25894939	ADARB1	104	21	46521281	-4.22671	2.66e-05	0.0100856	-2.69644	0.00711559	0.19499
cg13652892	VASH1	22846	14	77242311	-4.22602	2.66e-05	0.010089	1.03677	0.300071	0.925486
cg16544169	NKX2-6	137814	8	23564717	-4.22381	2.69e-05	0.0101588	2.86913	0.00419476	0.134625
cg17884327		0	3	197840760	-4.22181	2.71e-05	0.0102205	NA	NA	NA
cg12630983	FBN2	2201	5	127872200	-4.22015	2.73e-05	0.0102673	-0.695231	0.487057	0.972722
cg14379719	GATA4	2626	8	11561508	-4.21822	2.76e-05	0.0103259	3.63244	0.000293694	0.0201613
cg01294808	IRX1	79192	5	3599686	-4.21228	2.83e-05	0.0105675	-4.42225	1.07367e-05	0.00131775
cg05079049		0	16	55364843	-4.20897	2.87e-05	0.0106919	NA	NA	NA
cg13107669	OBSCN	84033	1	228473873	-4.20878	2.87e-05	0.0106725	0.424448	0.671322	0.992187
cg14564616		0	5	1876337	-4.20853	2.87e-05	0.0106563	NA	NA	NA
cg14011845	TBX4	9496	17	59533635	-4.20688	2.89e-05	0.0107049	0.453948	0.649956	0.988825
cg19187831	TMEM134	80194	11	67232316	-4.20454	2.92e-05	0.0107857	1.1707	0.241972	0.888034
cg02724556		0	16	88156107	-4.20413	2.93e-05	0.0107766	NA	NA	NA
cg20068535	AKAP12	9590	6	151560981	-4.20335	2.94e-05	0.010785	0.696757	0.486102	0.972829
cg13396201	FGF18	8817	5	170883681	-4.20308	2.94e-05	0.0107698	-3.53179	0.000429852	0.0267844
cg02853616		0	4	94755787	-4.20243	2.95e-05	0.0107729	NA	NA	NA
cg02439266	HOXA3	3200	7	27150042	-4.20061	2.97e-05	0.0108299	-1.37929	0.168085	0.815497
cg03070741	GNG7	2788	19	2650727	-4.1982	3e-05	0.0109154	-0.418812	0.675435	0.990459
cg04439622	CRIP2	1397	14	105944942	-4.19734	3.02e-05	0.0109279	-0.260289	0.79469	0.993166
cg10005978	DMRT3	58524	9	977818	-4.19505	3.05e-05	0.0110086	-1.43587	0.151325	0.785764
cg04095339	IRX4	50805	5	1879917	-4.19215	3.08e-05	0.0111187	-2.59715	0.00952558	0.234389
cg19678538	PCDHB14	56122	5	140605042	-4.19014	3.11e-05	0.0111873	-0.780206	0.435437	0.964142
cg15385479	MRGPRE	116534	11	3254475	-4.18776	3.14e-05	0.0112738	-0.0139458	0.988876	0.999836
cg02726121	GATA4	2626	8	11561531	-4.18671	3.16e-05	0.0112967	3.63244	0.000293694	0.0201613
cg06757405	PCDHGA4;PCDHGA9;PCDHGA1;PCDHGB1;PCDHGB6;PCDHGB3;PCDHGA6;PCDHGA8;PCDHGA5;PCDHGB4;PCDHGA3;PCDHGA2;PCDHGB2;PCDHGA7;PCDHGB5	56111	5	140789450	-4.18451	3.19e-05	0.0113755	-0.904295	0.366037	0.948633
cg25481705	KLC3	147700	19	45850053	-4.18322	3.2e-05	0.0114101	-1.68134	0.0929812	0.674655
cg13561879	UNC5D	137970	8	35092687	-4.1784	3.27e-05	0.0116202	0.55174	0.581238	0.98557
cg10890710		0	7	129402790	-4.17723	3.29e-05	0.0116498	NA	NA	NA
cg16672770	FAM38A	9780	16	88781907	-4.17199	3.36e-05	0.011885	0.131087	0.895731	0.99009
cg12122246	LMTK2	22853	7	97823410	-4.16998	3.39e-05	0.0119585	1.48152	0.138755	0.765024
cg14906690		0	10	76573506	-4.16869	3.41e-05	0.0119951	NA	NA	NA
cg19338222	RYR1	6261	19	39052032	-4.16502	3.47e-05	0.0121555	-0.932763	0.351147	0.947764
cg13056927	KBTBD5	131377	3	42727915	-4.16408	3.48e-05	0.0121743	-0.29379	0.768974	0.99492
cg20897830		0	7	56297579	-4.16365	3.49e-05	0.012167	NA	NA	NA
cg24579489	HDGF2	84717	19	4483181	-4.16168	3.52e-05	0.0122401	-0.197812	0.843228	0.992515
cg01775274	PCNT	5116	21	47811199	-4.1601	3.54e-05	0.0122932	-0.571809	0.567568	0.982966
cg06926314	ANKRD33B	651746	5	10650351	-4.15914	3.55e-05	0.0123139	NA	NA	NA
cg26469608		0	12	113913695	-4.15706	3.59e-05	0.0123939	NA	NA	NA
cg21488279	PRDM6	93166	5	122434178	-4.15669	3.59e-05	0.0123833	-2.4961	0.0127023	0.281439
cg11563680		0	6	100917397	-4.15404	3.63e-05	0.0124943	NA	NA	NA
cg16458596		0	14	99584812	-4.15395	3.63e-05	0.0124691	NA	NA	NA
cg12944146	PLXNB2	23654	22	50725609	-4.15106	3.68e-05	0.0125934	-0.186812	0.851842	0.992901
cg01709551		0	10	134892649	-4.1464	3.75e-05	0.0128157	NA	NA	NA
cg17198308	IFFO1	25900	12	6665108	-4.14561	3.77e-05	0.0128285	-0.180754	0.856594	0.992669
cg06497848	VAX1	11023	10	118896363	-4.14335	3.8e-05	0.012922	-0.221171	0.825	0.992578
cg19435859	KIAA0664	23277	17	2593076	-4.13784	3.89e-05	0.0131662	0.754582	0.450661	0.965342
cg17629929		0	5	1875548	-4.13742	3.9e-05	0.0131585	NA	NA	NA
cg09583939	PCDHA1	56147	5	140166213	-4.13265	3.98e-05	0.0133971	2.02706	0.0428971	0.504184
cg18888205		0	17	8908079	-4.13213	3.99e-05	0.013395	NA	NA	NA
cg23951961	BEND4	389206	4	42154912	-4.12951	4.03e-05	0.0134818	3.4396	0.000604418	0.0346744
cg16177732		0	18	10032765	-4.1294	4.03e-05	0.0134564	NA	NA	NA
cg16255914		0	19	53832438	-4.12909	4.04e-05	0.0134427	NA	NA	NA
cg10606269		0	12	131372010	-4.12806	4.06e-05	0.0134703	NA	NA	NA
cg04415616	BRI3BP	140707	12	125509664	-4.12711	4.07e-05	0.0134929	-0.0726265	0.942117	0.99317
cg05608794		0	Y	14649668	-4.12707	4.07e-05	0.0134641	NA	NA	NA
cg21921996		0	20	55685638	-4.12664	4.08e-05	0.0134576	NA	NA	NA
cg07670566	FBXW5	54461	9	139837659	-4.12317	4.14e-05	0.013626	1.71327	0.086945	0.662923
cg11411203		0	1	149333124	-4.12182	4.17e-05	0.013673	NA	NA	NA
cg23413924	DUOX1	53905	15	45427734	-4.12146	4.17e-05	0.0136625	0.133241	0.894027	0.990153
cg10195415	TRIM65	201292	17	73887371	-4.12081	4.18e-05	0.0136683	-0.226858	0.820576	0.99375
cg13413955	DMRT1	1761	9	842914	-4.12077	4.19e-05	0.0136396	-0.814687	0.415428	0.9584
cg05184256		0	16	88155593	-4.12059	4.19e-05	0.013619	NA	NA	NA
cg17279652	TRIM7	81786	5	180622276	-4.11813	4.23e-05	0.0137303	0.481051	0.630576	0.987915
cg27213509	EVX2	344191	2	176947228	-4.1179	4.24e-05	0.013713	-0.387416	0.698523	0.99213
cg00654888	EN1	2019	2	119603133	-4.11734	4.25e-05	0.013714	-1.54085	0.12364	0.740562
cg02272993		0	2	45159972	-4.11703	4.25e-05	0.0137011	NA	NA	NA
cg00870753	UBE2MP1	606551	16	34404772	-4.11669	4.26e-05	0.0136899	-0.117634	0.906379	0.991041
cg01954746	NCK2	8440	2	106509825	-4.11661	4.26e-05	0.0136637	-1.27382	0.202995	0.855894
cg12910906	ARHGEF4	50649	2	131673894	-4.11105	4.36e-05	0.0139271	-1.50309	0.133102	0.756513
cg18445088	CACNA1I	8911	22	40081812	-4.11053	4.37e-05	0.0139263	-0.429855	0.667385	0.991215
cg23709902	SRCIN1	80725	17	36719773	-4.10476	4.48e-05	0.0142073	-1.26749	0.205249	0.856302
cg02607130	GRIN3B	116444	19	1008643	-4.1039	4.5e-05	0.0142277	-0.78176	0.434524	0.964228
cg27575052	MVP	9961	16	29855904	-4.10184	4.54e-05	0.0142572	0.786906	0.431506	0.963656
cg25951981	GABRA4	2557	4	46995743	-4.10182	4.54e-05	0.014227	-0.466804	0.640733	0.988984
cg19091036		0	12	114878144	-4.09705	4.63e-05	0.0144532	NA	NA	NA
cg07622493		0	8	93114294	-4.09574	4.65e-05	0.0145016	NA	NA	NA
cg01515732	BATF	10538	14	76012927	-4.09447	4.68e-05	0.0145161	0.0919949	0.926719	0.992857
cg06003656		0	5	166405676	-4.09331	4.7e-05	0.0145241	NA	NA	NA
cg16357719	RNPS1	10921	16	2317538	-4.09218	4.72e-05	0.0145618	-0.216167	0.828897	0.991905
cg23497791	TFCP2L1	29842	2	121983739	-4.09176	4.73e-05	0.0145563	-0.82614	0.408904	0.95576
cg14617041	TMEM171	134285	5	72415687	-4.09145	4.74e-05	0.0145438	0.614315	0.539134	0.980689
cg03688085	KIAA1751	85452	1	1910585	-4.09121	4.74e-05	0.014527	-1.27027	0.204256	0.857105
cg26311782	DIP2C	22982	10	712032	-4.08974	4.77e-05	0.0145861	0.126883	0.899056	0.989822
cg05371578	ZIC1	7545	3	147128157	-4.08612	4.85e-05	0.0147789	-0.158353	0.874208	0.991797
cg09231031		0	16	88310707	-4.0846	4.88e-05	0.0148108	NA	NA	NA
cg05971891	NCK2	8440	2	106498513	-4.08423	4.89e-05	0.0148018	-1.27382	0.202995	0.855894
cg08352755		0	5	145758879	-4.08361	4.9e-05	0.014809	NA	NA	NA
cg24530460		0	14	37053689	-4.07945	4.98e-05	0.0150389	NA	NA	NA
cg02517215		0	12	132639461	-4.07593	5.06e-05	0.0151992	NA	NA	NA
cg02977829		0	X	40482442	-4.07578	5.06e-05	0.0151767	NA	NA	NA
cg09950916		0	6	100676889	-4.07559	5.07e-05	0.0151568	NA	NA	NA
cg01757312	SOX1	6656	13	112720565	-4.0749	5.08e-05	0.0151688	-0.548466	0.583483	0.985991
cg27424853	ACSF3	197322	16	89167154	-4.07471	5.08e-05	0.0151492	0.979884	0.327359	0.935027
cg26173375	LASS3	204219	15	101084509	-4.07125	5.16e-05	0.0153395	-2.13077	0.0333295	0.448475
cg24543255		0	11	69683359	-4.07107	5.16e-05	0.0153188	NA	NA	NA
cg25252585	FXYD7	53822	19	35633972	-4.07065	5.17e-05	0.0153139	1.29663	0.195031	0.847185
cg13526644	B3GNT6	192134	11	76751777	-4.06768	5.24e-05	0.0154745	0.583881	0.55942	0.982466
cg10948036	GPR123	84435	10	134926877	-4.06418	5.32e-05	0.0156708	1.29219	0.196564	0.84911
cg14844118	TFAP4	7023	16	4311941	-4.06339	5.33e-05	0.0156905	-0.398133	0.690609	0.992515
cg11693848	MYO16	23026	13	109793698	-4.06213	5.36e-05	0.0157412	1.19619	0.231879	0.879031
cg20370678		0	17	58216297	-4.06172	5.37e-05	0.0157354	NA	NA	NA
cg12794168	CSNK1A1P	161635	15	37110614	-4.05992	5.41e-05	0.0158226	0.693241	0.488304	0.972145
cg18751958	REXO1	57455	19	1827498	-4.05942	5.42e-05	0.0158233	-0.0175057	0.986036	1.00006
cg14319235	ELTD1	64123	1	79472282	-4.05915	5.43e-05	0.0158084	-2.54055	0.0112045	0.260509
cg09643544	ZNF177	7730	19	9473696	-4.05647	5.49e-05	0.0159547	-1.64251	0.100771	0.695063
cg14789818		0	1	227748712	-4.05395	5.55e-05	0.0160911	NA	NA	NA
cg24549659		0	4	187219643	-4.05392	5.55e-05	0.01606	NA	NA	NA
cg01596963	LRRN4CL	221091	11	62455830	-4.05352	5.56e-05	0.0160545	-1.91539	0.0557013	0.567694
cg18275316		0	5	3607063	-4.04884	5.67e-05	0.0163385	NA	NA	NA
cg21511816		0	14	76597824	-4.04869	5.67e-05	0.0163161	NA	NA	NA
cg08445802		0	6	85482612	-4.04747	5.7e-05	0.0163666	NA	NA	NA
cg14832317		0	4	13526597	-4.04681	5.72e-05	0.0163785	NA	NA	NA
cg00437192	PGAM5	192111	12	133294089	-4.04672	5.72e-05	0.0163521	0.0959435	0.923583	0.992701
cg02213822		0	9	128985576	-4.04611	5.73e-05	0.0163607	NA	NA	NA
cg17495715		0	2	176950273	-4.04388	5.79e-05	0.0164479	NA	NA	NA
cg09347582	KIAA1804	0	1	233497916	-4.04018	5.88e-05	0.0166381	NA	NA	NA
cg05477514	NKX2-6	137814	8	23564008	-4.03946	5.89e-05	0.0166546	2.86913	0.00419476	0.134625
cg04034583	EN1	2019	2	119603108	-4.03729	5.95e-05	0.0167731	-1.54085	0.12364	0.740562
cg05573818	RASA3	22821	13	114782020	-4.03511	6e-05	0.0168929	0.397016	0.691432	0.992712
cg04043150		0	1	110673319	-4.03505	6e-05	0.0168638	NA	NA	NA
cg07788092	ZNF177	7730	19	9473691	-4.03437	6.02e-05	0.0168781	-1.64251	0.100771	0.695063
cg22685409	KCNA4	3739	11	30038692	-4.03258	6.07e-05	0.0169711	0.238125	0.811829	0.994696
cg11379081		0	1	209405050	-4.03101	6.11e-05	0.017049	NA	NA	NA
cg05065572	TBX5	6910	12	114833912	-4.03042	6.12e-05	0.0170576	-4.41615	1.10382e-05	0.00134659
cg00363813	IFFO1	25900	12	6664872	-4.02985	6.14e-05	0.0170647	-0.180754	0.856594	0.992669
cg26645834	SPO11	23626	20	55904875	-4.02902	6.16e-05	0.0170908	-0.192132	0.847674	0.992269
cg15885953	ADARB1	104	21	46520883	-4.02889	6.16e-05	0.0170666	-2.69644	0.00711559	0.19499
cg25421069	CHST5	23563	16	75563114	-4.02857	6.17e-05	0.0170564	-1.35928	0.174336	0.82238
cg18592365	ELTD1	64123	1	79472536	-4.02638	6.22e-05	0.0171794	-2.54055	0.0112045	0.260509
cg08252579	FEZF2	55079	3	62359773	-4.02319	6.31e-05	0.0173753	-0.863539	0.38803	0.953987
cg22110896	TBX4	9496	17	59533081	-4.02079	6.37e-05	0.0175156	0.453948	0.649956	0.988825
cg25287482	ID3	3399	1	23884847	-4.02054	6.38e-05	0.0175	-1.25344	0.210313	0.86111
cg16424078		0	6	1384705	-4.02048	6.38e-05	0.0174702	NA	NA	NA
cg25362652		0	6	106429769	-4.01946	6.41e-05	0.0175112	NA	NA	NA
cg17652028	JPH1	56704	8	75227355	-4.01912	6.42e-05	0.0175025	-1.64978	0.0992726	0.691086
cg07006091		0	12	114878487	-4.01911	6.42e-05	0.0174698	NA	NA	NA
cg23244488		0	7	19146032	-4.01867	6.43e-05	0.0174678	NA	NA	NA
cg02154252	ELTD1	64123	1	79472532	-4.01691	6.47e-05	0.0175626	-2.54055	0.0112045	0.260509
cg25360180		0	12	101110281	-4.01655	6.48e-05	0.0175558	NA	NA	NA
cg08490115	KCNA4	3739	11	30038675	-4.01643	6.49e-05	0.0175307	0.238125	0.811829	0.994696
cg03453572	GAL3ST1	9514	22	30951374	-4.016	6.5e-05	0.0175293	1.00202	0.316554	0.930817
cg15254559		0	7	27292145	-4.01548	6.51e-05	0.017534	NA	NA	NA
cg03706436		0	19	30717225	-4.01042	6.65e-05	0.0178721	NA	NA	NA
cg05053327	CNTNAP1	8506	17	40837383	-4.01018	6.66e-05	0.0178561	0.332819	0.739335	0.99279
cg19970121	HEPHL1	341208	11	93822184	-4.0095	6.68e-05	0.0178727	-0.996482	0.319235	0.931934
cg12468377	PIK3R5	23533	17	8791763	-4.00846	6.71e-05	0.017917	0.724808	0.468724	0.969177
cg12684052		0	17	19883602	-4.00465	6.81e-05	0.0181675	NA	NA	NA
cg07211472	SDK1	221935	7	4304846	-4.00407	6.83e-05	0.0181774	0.367509	0.71331	0.991166
cg09767822	DBX1	120237	11	20178040	-4.00283	6.86e-05	0.0182371	0.216797	0.828407	0.991904
cg13519863	VAX2	25806	2	71131748	-4.00182	6.89e-05	0.0182791	0.0088896	0.992909	0.999473
cg01324452	C19orf6	91304	19	1011666	-3.99987	6.95e-05	0.018359	0.118768	0.905481	0.990862
cg16065021		0	12	127940654	-3.99848	6.99e-05	0.0184306	NA	NA	NA
cg06468166	FBXL7	23194	5	15936768	-3.99744	7.02e-05	0.0184758	-1.9662	0.0495269	0.538362
cg10056739	ATP11A	23250	13	113429178	-3.99641	7.05e-05	0.0185208	0.0118716	0.99053	0.999413
cg07536910	EVX2	344191	2	176948105	-3.99466	7.1e-05	0.0186209	-0.387416	0.698523	0.99213
cg07196426	TFAP2E	339488	1	36042433	-3.99464	7.1e-05	0.018588	-1.24088	0.214914	0.860462
cg07870999		0	7	155260895	-3.99229	7.17e-05	0.0187347	NA	NA	NA
cg08192165		0	6	87832220	-3.99174	7.19e-05	0.0187431	NA	NA	NA
cg18313790	PCDHB13	56123	5	140595722	-3.989	7.27e-05	0.0189223	0.110193	0.912276	0.991547
cg07179669	HLX	3142	1	221054707	-3.98896	7.27e-05	0.0188902	-0.726823	0.467489	0.968899
cg10245330	SDCCAG8;AKT3	10806	1	243652681	-3.98486	7.39e-05	0.0191784	0.375555	0.70732	0.992169
cg09957942		0	13	20968936	-3.98443	7.41e-05	0.0191771	NA	NA	NA
cg01513392		0	20	21488198	-3.98351	7.43e-05	0.0192152	NA	NA	NA
cg14258623		0	6	1384591	-3.982	7.48e-05	0.0193	NA	NA	NA
cg14639163	WNT6	7475	2	219738529	-3.97842	7.59e-05	0.0195516	-0.419722	0.674771	0.990776
cg19273253	MRPL23	6150	11	1974132	-3.97834	7.59e-05	0.0195224	-0.428946	0.668046	0.99147
cg02164046	SST	6750	3	187388148	-3.97792	7.61e-05	0.0195209	1.01227	0.311633	0.927797
cg17563034	CYTL1	54360	4	5021268	-3.97646	7.65e-05	0.0196036	0.502653	0.615309	0.986902
cg06433023	NR2E1	7101	6	108488544	-3.97537	7.69e-05	0.0196564	-0.566914	0.570888	0.983502
cg14401466		0	5	166405523	-3.97256	7.78e-05	0.0198496	NA	NA	NA
cg16956686	SDK1	221935	7	4304779	-3.97234	7.78e-05	0.0198323	0.367509	0.71331	0.991166
cg09187933		0	12	127630812	-3.97216	7.79e-05	0.0198113	NA	NA	NA
cg05214685		0	2	223177493	-3.9673	7.95e-05	0.0201749	NA	NA	NA
cg01568919	FZD10	11211	12	130647890	-3.96638	7.98e-05	0.0202157	-0.736042	0.461862	0.968739
cg13775636	DIP2C	22982	10	711897	-3.96477	8.03e-05	0.0203133	0.126883	0.899056	0.989822
cg19441128	C12orf12	196477	12	91347962	-3.96463	8.04e-05	0.020289	-0.360818	0.718305	0.991507
cg15657936	GPR78	27201	4	8583363	-3.96339	8.08e-05	0.0203563	0.316927	0.751359	0.993651
cg08577953		0	4	100574455	-3.96172	8.13e-05	0.0204605	NA	NA	NA
cg18298920		0	5	3607033	-3.95962	8.2e-05	0.0206014	NA	NA	NA
cg23742669	C18orf1	753	18	13642414	-3.95951	8.21e-05	0.0205741	-1.61678	0.106212	0.707068
cg12479878	HLX	3142	1	221054825	-3.95444	8.38e-05	0.0208965	-0.726823	0.467489	0.968899
cg00569190		0	3	120025901	-3.95373	8.4e-05	0.0209203	NA	NA	NA
cg13651859	CKS2	1164	9	91926249	-3.95126	8.49e-05	0.0210961	-1.45967	0.144666	0.773601
cg15422685	FEZF2	55079	3	62356774	-3.95047	8.52e-05	0.0211279	-0.863539	0.38803	0.953987
cg05376374	MIR129-2	406918	11	43602920	-3.94811	8.6e-05	0.0212954	NA	NA	NA
cg10906415	SRCIN1	80725	17	36719937	-3.94572	8.68e-05	0.0214679	-1.26749	0.205249	0.856302
cg04464062	ZFPM1	161882	16	88540349	-3.94357	8.76e-05	0.0216194	0.392412	0.69483	0.992173
cg17392455	SMTNL2	342527	17	4510572	-3.94272	8.79e-05	0.0216571	1.52867	0.126634	0.747004
cg23883696	NETO1	81832	18	70534298	-3.9417	8.83e-05	0.0217103	-2.07746	0.0379905	0.473735
cg04834436	IRX6	79190	16	55362754	-3.93719	8.99e-05	0.022038	-2.15419	0.0314415	0.435217
cg07239227	ZNF579	163033	19	56090686	-3.93648	9.02e-05	0.022064	-0.769549	0.441733	0.965414
cg09619624		0	22	18985632	-3.93496	9.07e-05	0.0221253	NA	NA	NA
cg25976845		0	9	69065510	-3.93447	9.09e-05	0.0221315	NA	NA	NA
cg26970905	PRAGMIN	157285	8	8175877	-3.93351	9.13e-05	0.0221802	1.13683	0.255859	0.897988
cg08811888	CBX6	23466	22	39262900	-3.93294	9.15e-05	0.022194	0.899034	0.368832	0.949918
cg05589845	EVX1	2128	7	27282444	-3.92767	9.35e-05	0.0225612	-0.141317	0.887646	0.99067
cg27630202	PCDHGA4;PCDHGA9;PCDHGA1;PCDHGB1;PCDHGB7;PCDHGB6;PCDHGA11;PCDHGB3;PCDHGA6;PCDHGA8;PCDHGA10;PCDHGA5;PCDHGB4;PCDHGA3;PCDHGA2;PCDHGA7;PCDHGB2;PCDHGB5	56111	5	140799305	-3.92716	9.37e-05	0.02257	-0.904295	0.366037	0.948633
cg14784343		0	11	1293406	-3.9253	9.44e-05	0.0227029	NA	NA	NA
cg16771467	ATP8B1	5205	18	55315872	-3.92421	9.48e-05	0.022766	-1.20454	0.228638	0.875265
cg18232772		0	22	50165512	-3.92273	9.54e-05	0.0228644	NA	NA	NA
cg26517171	TLX3	30012	5	170735347	-3.9219	9.57e-05	0.022903	0.896306	0.370285	0.95064
cg05115664		0	9	90621637	-3.91893	9.69e-05	0.023143	NA	NA	NA
cg09393254	MCHR2	84539	6	100442118	-3.91766	9.74e-05	0.0232233	2.01489	0.0441593	0.510428
cg02725313	REM1	28954	20	30071913	-3.91666	9.78e-05	0.0232792	0.120109	0.904419	0.990449
cg09451320		0	12	132639764	-3.9159	9.81e-05	0.0233126	NA	NA	NA
cg17167253	EN1	2019	2	119603383	-3.91577	9.81e-05	0.0232854	-1.54085	0.12364	0.740562
cg01104724		0	7	56297564	-3.91501	9.84e-05	0.0233186	NA	NA	NA
cg14156751		0	10	50976571	-3.91466	9.86e-05	0.023313	NA	NA	NA
cg03405593	MLLT1	4298	19	6212001	-3.91389	9.89e-05	0.0233479	1.13435	0.256896	0.898982
cg08348949	PCDHB9	56127	5	140568340	-3.91388	9.89e-05	0.0233102	-1.80891	0.0707379	0.619599
cg24576050	PCDHGA4;PCDHGA11;PCDHGA9;PCDHGA1;PCDHGB1;PCDHGB6;PCDHGA12;PCDHGB3;PCDHGB7;PCDHGA6;PCDHGA8;PCDHGA10;PCDHGA5;PCDHGB4;PCDHGA3;PCDHGA2;PCDHGA7;PCDHGB2;PCDHGB5	56111	5	140810562	-3.91338	9.91e-05	0.0233188	-0.904295	0.366037	0.948633
cg01520447	NCK2	8440	2	106498162	-3.91158	9.98e-05	0.0234508	-1.27382	0.202995	0.855894
cg09095222	SHOX2	6474	3	157816094	-3.91127	9.99e-05	0.0234418	-2.2661	0.0236386	0.386365
cg01396176		0	12	114881783	-3.90667	0.000101801	0.0237659	NA	NA	NA
cg25547580	ONECUT2	9480	18	55103734	-3.90619	0.000102001	0.0237736	-0.217229	0.82807	0.991911
cg01532436	CYTH2	9266	19	48983942	-3.90503	0.00010248	0.0238462	-1.35089	0.177007	0.825367
cg17743719	STX11	8676	6	144507827	-3.90376	0.000103011	0.0239306	0.43464	0.663909	0.991068
cg01348293		0	7	27260113	-3.90192	0.000103782	0.0240314	NA	NA	NA
cg06148736		0	22	18985691	-3.90182	0.000103822	0.0240016	NA	NA	NA
cg14213394		0	8	38508585	-3.90007	0.000104563	0.0241337	NA	NA	NA
cg10404717	MIR219-2	407003	9	131154962	-3.89976	0.000104695	0.0241251	NA	NA	NA
cg10786829		0	13	44545173	-3.89829	0.000105318	0.0242294	NA	NA	NA
cg24705960	FEZF2	55079	3	62359456	-3.89818	0.000105366	0.0242014	-0.863539	0.38803	0.953987
cg06133145	PRIMA1	145270	14	94254351	-3.89767	0.000105584	0.0242124	-2.20327	0.0277821	0.413081
cg12018140	PRDM6	93166	5	122434326	-3.89705	0.000105846	0.0242335	-2.4961	0.0127023	0.281439
cg11973132	ADRBK1	156	11	67052656	-3.89652	0.000106073	0.0242464	2.16465	0.030629	0.431042
cg00503302		0	3	62355319	-3.89527	0.000106612	0.0243306	NA	NA	NA
cg19767622		0	6	164051738	-3.89372	0.000107285	0.024445	NA	NA	NA
cg19821098	DSCAML1	57453	11	117352790	-3.89359	0.000107342	0.0244189	0.422226	0.672943	0.991398
cg21928406	PCDHGA4;PCDHGA9;PCDHGA1;PCDHGB1;PCDHGB6;PCDHGB3;PCDHGA11;PCDHGB7;PCDHGA6;PCDHGA8;PCDHGA10;PCDHGA5;PCDHGB4;PCDHGA3;PCDHGA2;PCDHGB2;PCDHGA7;PCDHGB5	56111	5	140802669	-3.89341	0.00010742	0.0243977	-0.904295	0.366037	0.948633
cg14167415		0	5	77146999	-3.89286	0.000107659	0.024413	NA	NA	NA
cg12215340	ADRA1D	146	20	4229610	-3.89284	0.000107667	0.024376	0.199728	0.84173	0.992656
cg26186727	NETO1	81832	18	70534534	-3.89084	0.000108539	0.0245345	-2.07746	0.0379905	0.473735
cg07659054	HOXA1	3198	7	27134225	-3.88749	0.000110019	0.0248296	-1.22925	0.219242	0.865811
cg23929344	SFTA3	253970	14	36975402	-3.88663	0.0001104	0.0248762	-0.456354	0.648225	0.988123
cg06292124	GRASP	160622	12	52408520	-3.88562	0.000110851	0.0249383	-0.727412	0.467128	0.968846
cg04004787		0	7	27286234	-3.88367	0.000111731	0.0250967	NA	NA	NA
cg01859340		0	18	44775576	-3.88318	0.000111948	0.0251058	NA	NA	NA
cg01944655	SRRM4	84530	12	119418804	-3.88117	0.000112861	0.0252311	0.186584	0.852021	0.992766
cg01726065	KIF7	374654	15	90171768	-3.88083	0.000113015	0.0252259	-1.19765	0.231312	0.877869
cg09796800	SLC25A31	83447	4	128651518	-3.87946	0.000113643	0.0253264	0.889412	0.373976	0.952029
cg22702960	TRPM4	54795	19	49685912	-3.87936	0.000113688	0.0252968	-1.21559	0.224401	0.872401
cg04845915	PCDHGA4;PCDHGA11;PCDHGA9;PCDHGA1;PCDHGB1;PCDHGB6;PCDHGB3;PCDHGB7;PCDHGA6;PCDHGA8;PCDHGA10;PCDHGA5;PCDHGB4;PCDHGA3;PCDHGA2;PCDHGB2;PCDHGA7;PCDHGB5	56111	5	140802804	-3.87644	0.000115034	0.0255166	-0.904295	0.366037	0.948633
cg05012672	NCLN	56926	19	3189830	-3.87636	0.000115073	0.0254855	-1.32706	0.184763	0.833139
cg09591524	HOXA3	3200	7	27150031	-3.87611	0.000115187	0.0254712	-1.37929	0.168085	0.815497
cg06071058	BARX1	56033	9	96716091	-3.87606	0.000115209	0.0254365	-0.738494	0.460372	0.968422
cg06183338	COL23A1	91522	5	178004204	-3.87489	0.000115755	0.0255175	0.691936	0.489124	0.972437
cg09872841	ITPKB	3707	1	226829776	-3.87306	0.000116612	0.0256271	0.324135	0.745897	0.993304
cg17774672		0	7	25898541	-3.87236	0.00011694	0.0256596	NA	NA	NA
cg03631455	PCDHB13	56123	5	140595072	-3.87227	0.000116983	0.0256295	0.110193	0.912276	0.991547
cg07455790		0	6	31650735	-3.87213	0.000117047	0.0256042	NA	NA	NA
cg27495643	PRKAR1B	5575	7	611397	-3.87175	0.000117226	0.025604	0.392257	0.694944	0.992057
cg02488942		0	2	105480687	-3.87065	0.000117747	0.0256784	NA	NA	NA
cg17922359		0	4	13530923	-3.86786	0.000119074	0.0259281	NA	NA	NA
cg04882397		0	2	237068072	-3.86695	0.000119512	0.0259837	NA	NA	NA
cg27649194	CACNA2D4	93589	12	1974168	-3.86687	0.00011955	0.0259524	0.697621	0.485562	0.973479
cg16842214	KBTBD5	131377	3	42727160	-3.86647	0.000119744	0.0259549	-0.29379	0.768974	0.99492
cg01610632	ZIC1	7545	3	147127579	-3.86277	0.000121537	0.0263035	-0.158353	0.874208	0.991797
cg07440775	GAD2	2572	10	26507383	-3.86238	0.000121729	0.0263051	-0.404978	0.685572	0.991822
cg24953922	TAS1R2	80834	1	19181419	-3.86231	0.000121761	0.0262722	-0.845508	0.398011	0.956805
cg20276088		0	3	133502917	-3.86142	0.000122196	0.0262864	NA	NA	NA
cg26053480		0	7	25898758	-3.86109	0.00012236	0.0262819	NA	NA	NA
cg14431443	TBX5	6910	12	114846431	-3.86019	0.000122802	0.0263371	-4.41615	1.10382e-05	0.00134659
cg22562942	NEFM	4741	8	24772309	-3.85897	0.000123406	0.0264269	-2.25452	0.0243593	0.390269
cg25007487	OOEP	441161	6	74079672	-3.85821	0.000123785	0.0264682	1.84401	0.06545	0.604115
cg14629055	ANKRD33B	651746	5	10562978	-3.8559	0.000124933	0.0266737	NA	NA	NA
cg18805066	HOXA1	3198	7	27134259	-3.85336	0.000126213	0.0268664	-1.22925	0.219242	0.865811
cg05575614		0	6	106434354	-3.8531	0.000126347	0.0268548	NA	NA	NA
cg17203647	EBF2	64641	8	25897201	-3.8512	0.000127311	0.0269791	-1.96516	0.049647	0.53909
cg12878812	SRRM4	84530	12	119419696	-3.84917	0.000128349	0.0271587	0.186584	0.852021	0.992766
cg09319072		0	18	44775413	-3.84912	0.000128374	0.0271237	NA	NA	NA
cg09425032		0	19	14196582	-3.84867	0.00012861	0.0271333	NA	NA	NA
cg00715682	PAF1;MED29	54623	19	39881530	-3.84822	0.000128838	0.0271011	-0.100666	0.919834	0.9922
cg26770907		0	16	48844808	-3.84812	0.00012889	0.027072	NA	NA	NA
cg07149609		0	1	170630734	-3.84664	0.000129654	0.0271924	NA	NA	NA
cg00085434		0	11	14927489	-3.84137	0.00013242	0.0277317	NA	NA	NA
cg17520539	AKAP12	9590	6	151560927	-3.84018	0.000133052	0.0278231	0.696757	0.486102	0.972829
cg11839291		0	20	39321646	-3.83992	0.000133191	0.0278113	NA	NA	NA
cg06900311		0	14	106333919	-3.83983	0.000133237	0.0277802	NA	NA	NA
cg00646241	SHANK2	22941	11	70563878	-3.83878	0.000133797	0.0278562	-1.12771	0.259687	0.898347
cg24792289		0	5	134825895	-3.83875	0.000133814	0.0278191	NA	NA	NA
cg20674128	ERCC2	2068	19	45867181	-3.83809	0.000134168	0.027852	2.25109	0.0245767	0.391583
cg02492207	MIB2	142678	1	1560894	-3.83532	0.000135657	0.0281201	0.862054	0.388846	0.953562
cg08965888		0	11	44341446	-3.83401	0.00013637	0.0282268	NA	NA	NA
cg14610403	SGIP1	84251	1	66998812	-3.83263	0.000137122	0.0283413	-5.37352	9.42171e-08	1.98749e-05
cg11005628	PCDHB12	56124	5	140590533	-3.83162	0.000137674	0.0284141	-0.892217	0.372472	0.951069
cg03506489	KCNA4	3739	11	30038788	-3.83082	0.000138114	0.0284637	0.238125	0.811829	0.994696
cg21874862	SELO	83642	22	50644682	-3.83063	0.000138223	0.028445	0.95119	0.341717	0.942153
cg25036261	NRXN1	9378	2	51254823	-3.83056	0.000138257	0.0284109	-0.394432	0.693339	0.992633
cg19802639	CBX6	23466	22	39263202	-3.83053	0.000138278	0.0283743	0.899034	0.368832	0.949918
cg08104981	GPR39	2863	2	133343149	-3.8293	0.000138955	0.0284722	-2.35819	0.0185387	0.346335
cg20100671	SYDE1	85360	19	15224615	-3.82909	0.00013907	0.0284548	-0.565907	0.571573	0.98376
cg05476956	PCDHB13	56123	5	140595291	-3.82831	0.000139504	0.0285026	0.110193	0.912276	0.991547
cg17410603		0	7	139992322	-3.82286	0.000142569	0.0290455	NA	NA	NA
cg19029181	ZIC1	7545	3	147130536	-3.82248	0.000142783	0.0290476	-0.158353	0.874208	0.991797
cg13331354	SSBP4	170463	19	18539841	-3.8206	0.000143857	0.0291827	1.23438	0.217323	0.863791
cg04059568	PTPRN2	5799	7	157486012	-3.81974	0.00014435	0.029241	0.271004	0.786439	0.993585
cg20334116		0	4	57458636	-3.81949	0.000144491	0.029228	NA	NA	NA
cg19092981	TBX1	6899	22	19751654	-3.81798	0.000145361	0.0293207	-0.0156728	0.987498	0.999841
cg02063817		0	7	27253521	-3.817	0.000145933	0.0293945	NA	NA	NA
cg23390118	CACNA1C	775	12	2339513	-3.81656	0.000146183	0.0294032	-1.43058	0.152833	0.788141
cg04329125	CRIP2	1397	14	105945022	-3.81554	0.000146778	0.0294813	-0.260289	0.79469	0.993166
cg15452970		0	1	91190620	-3.81264	0.000148478	0.0296971	NA	NA	NA
cg00055679		0	13	79170430	-3.80933	0.000150441	0.0300475	NA	NA	NA
cg07571637	SHANK3	85358	22	51143260	-3.80901	0.000150637	0.0300445	-0.376737	0.706442	0.992105
cg09357268	KCNK15	60598	20	43379437	-3.80891	0.000150697	0.0300144	-0.602266	0.547121	0.981899
cg05654361	ABCA3	21	16	2338111	-3.8085	0.000150938	0.0300204	1.19605	0.231936	0.879083
cg22560214		0	4	13531213	-3.80841	0.000150997	0.0299903	NA	NA	NA
cg24402975	C19orf6	91304	19	1009732	-3.80723	0.000151706	0.0300891	0.118768	0.905481	0.990862
cg19800591	CASC4	113201	15	44581430	-3.80593	0.000152486	0.0302018	1.28095	0.200483	0.852937
cg09109614	HMG20B	10362	19	3578055	-3.80552	0.000152735	0.0302091	-1.15	0.250393	0.894149
cg06024642	SMTNL2	342527	17	4510776	-3.8053	0.000152872	0.0301942	1.52867	0.126634	0.747004
cg02582520	GRIN3B	116444	19	1009172	-3.80368	0.000153852	0.0303457	-0.78176	0.434524	0.964228
cg14365785	MTUS2	23281	13	30054440	-3.80269	0.000154459	0.0304233	0.362369	0.717146	0.991326
cg02768300	SART1	9092	11	65744136	-3.80266	0.000154478	0.030385	0.175182	0.860969	0.992005
cg21030416		0	11	62693396	-3.80186	0.000154969	0.0304395	NA	NA	NA
cg22488849		0	5	3607134	-3.80081	0.000155615	0.0305243	NA	NA	NA
cg24229188	HMG20B	10362	19	3576629	-3.80027	0.000155947	0.0305474	-1.15	0.250393	0.894149
cg03365733	PRDM13	59336	6	100055662	-3.79946	0.000156445	0.0306028	-0.302263	0.762509	0.993857
cg02557364		0	7	143208268	-3.79902	0.00015672	0.0306146	NA	NA	NA
cg02456087		0	7	27291541	-3.7973	0.00015779	0.0307814	NA	NA	NA
cg00397986	GATA4	2626	8	11561593	-3.79722	0.000157839	0.0307488	3.63244	0.000293694	0.0201613
cg08190858		0	12	54321346	-3.7972	0.000157856	0.0307101	NA	NA	NA
cg09599111	TSSK2;DGCR14	23617	22	19119701	-3.79587	0.000158689	0.03083	NA	NA	NA
cg23971170	LMX1A	4009	1	165326269	-3.79469	0.00015943	0.0309318	-2.16952	0.0302565	0.428179
cg18830978	KIAA1704;NUFIP1	55425	13	45563598	-3.79433	0.000159657	0.0309337	2.09253	0.0366199	0.465823
cg18654956		0	9	68377657	-3.79424	0.000159714	0.0309027	NA	NA	NA
cg21617516	CAPN2	824	1	223936838	-3.79391	0.000159925	0.0309015	0.826419	0.408745	0.956163
cg07312485	ZNF598	90850	16	2052423	-3.79307	0.000160452	0.0309195	0.337459	0.735835	0.992633
cg06358171	SSBP3	23648	1	54822008	-3.78859	0.000163318	0.0314292	1.83526	0.0667371	0.609055
cg21207731		0	2	213696350	-3.7882	0.00016357	0.0314352	NA	NA	NA
cg02264079		0	16	31053489	-3.78455	0.00016595	0.0318497	NA	NA	NA
cg19909239	PITX2	5308	4	111555503	-3.78409	0.000166247	0.0318637	-2.22952	0.0259806	0.400405
cg00874990		0	7	156409160	-3.78327	0.00016679	0.0319248	NA	NA	NA
cg26607337		0	5	145758881	-3.783	0.000166965	0.0319154	NA	NA	NA
cg06571387	HOXD12	3238	2	176964101	-3.78259	0.000167233	0.0319238	7.13243	1.78443e-12	7.6886e-10
cg20556517	SSBP4	170463	19	18540330	-3.78235	0.000167396	0.0319121	1.23438	0.217323	0.863791
cg05941060	PCDHB9	56127	5	140568856	-3.78108	0.000168236	0.0320294	-1.80891	0.0707379	0.619599
cg02167190	DUSP14	11072	17	35872723	-3.7805	0.000168622	0.03206	-2.36503	0.0182013	0.344804
cg09772792		0	16	55366021	-3.77982	0.000169069	0.0320594	NA	NA	NA
cg06405186	SYT7	9066	11	61283968	-3.77773	0.00017047	0.0322821	0.694292	0.487646	0.972267
cg11310693	TECTA	7007	11	121028592	-3.77732	0.000170744	0.032291	-0.121468	0.903342	0.990341
cg27069422	PCDHB6	56130	5	140531474	-3.77593	0.000171684	0.0324257	0.710546	0.477516	0.972463
cg18705909	PCDHGA4;PCDHGA1;PCDHGA6;PCDHGA5;PCDHGB1;PCDHGA3;PCDHGA2;PCDHGB2;PCDHGB3	56111	5	140753924	-3.77586	0.00017173	0.0323915	-0.904295	0.366037	0.948633
cg13891220	PITX2	5308	4	111549953	-3.77272	0.000173868	0.0327513	-2.22952	0.0259806	0.400405
cg08791953	HTRA3	94031	4	8307888	-3.77253	0.000174	0.0327329	-2.63935	0.00842386	0.216213
cg13953753	VAX1	11023	10	118896012	-3.77128	0.000174859	0.0328511	-0.221171	0.825	0.992578
cg21073927	GATA4	2626	8	11562155	-3.77124	0.000174885	0.0328127	3.63244	0.000293694	0.0201613
cg03178798		0	18	10032699	-3.76955	0.000176048	0.0329441	NA	NA	NA
cg02361878	LMX1A	4009	1	165326327	-3.76835	0.000176884	0.0330571	-2.16952	0.0302565	0.428179
cg24411961	C1orf94	84970	1	34642396	-3.76748	0.000177489	0.0331267	-0.949748	0.342449	0.942758
cg13677149	EVX1	2128	7	27284789	-3.76485	0.000179336	0.0334276	-0.141317	0.887646	0.99067
cg02060566		0	12	114878954	-3.76396	0.000179962	0.0334567	NA	NA	NA
cg24813176	WNT6	7475	2	219736167	-3.76307	0.000180592	0.0335301	-0.419722	0.674771	0.990776
cg12591125	MAD1L1	8379	7	1885375	-3.76301	0.000180632	0.0334938	0.968033	0.333241	0.939766
cg18557185		0	7	27128169	-3.76061	0.000182345	0.0337675	NA	NA	NA
cg20434741	TERT	7015	5	1270927	-3.75851	0.00018385	0.034002	-0.388393	0.697801	0.991939
cg05336395	PCDH8	5100	13	53421688	-3.75749	0.000184588	0.0340942	-0.549157	0.583009	0.985766
cg08198862	RGL3	57139	19	11529947	-3.75722	0.000184789	0.0340871	0.366901	0.713763	0.991115
cg23894086		0	7	27128046	-3.75647	0.000185333	0.0341432	NA	NA	NA
cg03690956		0	10	118900324	-3.75484	0.000186518	0.0343171	NA	NA	NA
cg06285241	CRIP2	1397	14	105944655	-3.7545	0.000186768	0.0342746	-0.260289	0.79469	0.993166
cg18274480		0	5	145713863	-3.75404	0.000187104	0.034292	NA	NA	NA
cg18533225	KLHDC7B	113730	22	50986813	-3.75354	0.000187474	0.0343157	-0.364234	0.715753	0.991634
cg23181580		0	11	22454301	-3.75085	0.000189455	0.0346338	NA	NA	NA
cg27114512	SARDH	1757	9	136568145	-3.74927	0.000190636	0.034805	0.744951	0.456461	0.968646
cg08521967	GJC2	57165	1	228345490	-3.74908	0.000190776	0.034786	-0.87308	0.38281	0.954362
cg26160153	TCF23	150921	2	27373014	-3.74851	0.000191201	0.0348189	4.29403	1.90943e-05	0.00211299
cg15390560	FLJ40434	0	1	53905143	-3.74725	0.000192144	0.0349459	NA	NA	NA
cg21687740		0	1	157164556	-3.74696	0.000192368	0.034942	NA	NA	NA
cg11213199	MRPS24	64951	7	43909298	-3.74621	0.000192933	0.0349555	0.905228	0.365543	0.947958
cg12763457		0	11	1293766	-3.74421	0.000194445	0.0351847	NA	NA	NA
cg24932457	TNR	7143	1	175568559	-3.74386	0.000194711	0.0351881	-0.160288	0.872684	0.991735
cg23041250	PLXNB2	23654	22	50725605	-3.74343	0.000195043	0.0352034	-0.186812	0.851842	0.992901
cg23208176		0	5	1876168	-3.74219	0.000195984	0.0353285	NA	NA	NA
cg05620980		0	7	562844	-3.74159	0.000196448	0.0353673	NA	NA	NA
cg10260267		0	7	1278142	-3.74064	0.000197181	0.0354545	NA	NA	NA
cg10147479		0	4	185872977	-3.74016	0.00019755	0.035476	NA	NA	NA
cg16125371	ALX4	60529	11	44332719	-3.73935	0.000198174	0.0355433	-0.327898	0.743051	0.993171
cg07915921		0	12	54321502	-3.73671	0.000200228	0.0358214	NA	NA	NA
cg14460558		0	9	90795554	-3.7354	0.000201256	0.0359602	NA	NA	NA
cg06245181	ACSF3	197322	16	89186403	-3.73199	0.000203946	0.0363496	0.979884	0.327359	0.935027
cg11055493	HHEX	3087	10	94451351	-3.73175	0.000204144	0.0363394	2.26394	0.0237716	0.386666
cg04864807		0	2	121412139	-3.73121	0.000204573	0.036325	NA	NA	NA
cg03035653	PCDH19	57526	X	99662932	-3.7307	0.000204978	0.0363516	-2.20102	0.0279416	0.414235
cg05009662	NFE2L1	4779	17	46136650	-3.72922	0.000206162	0.0365161	0.516629	0.605519	0.987864
cg13491462		0	6	1384491	-3.72501	0.000209572	0.0369363	NA	NA	NA
cg02484774		0	19	14196418	-3.72088	0.000212965	0.0374416	NA	NA	NA
cg19346084		0	22	50496499	-3.71781	0.000215526	0.0378451	NA	NA	NA
cg26865002	KIAA1751	85452	1	1913246	-3.71705	0.000216163	0.0379103	-1.27027	0.204256	0.857105
cg25574769	OLFML2A	169611	9	127572127	-3.71526	0.000217674	0.0381283	-2.95024	0.0032425	0.116219
cg04904318	HOXB1	3211	17	46607828	-3.7147	0.000218146	0.038164	1.0395	0.298799	0.92551
cg22172057	ADARB2	105	10	1405937	-3.71462	0.000218217	0.0381296	0.192841	0.847119	0.992365
cg23865240	HOXA1	3198	7	27134109	-3.71397	0.000218768	0.038179	-1.22925	0.219242	0.865811
cg26181818	ALPI	248	2	233323935	-3.71304	0.000219557	0.0382698	0.937692	0.348609	0.947226
cg06532212	FKRP	79147	19	47260078	-3.71284	0.000219728	0.0382528	-2.05264	0.0403436	0.490395
cg00313722	C19orf6	91304	19	1009949	-3.71233	0.000220163	0.0382817	0.118768	0.905481	0.990862
cg05457075	CRAMP1L	57585	16	1676296	-3.71231	0.000220182	0.0382384	1.15398	0.248759	0.894304
cg06766541		0	7	128556540	-3.71214	0.000220324	0.0382164	NA	NA	NA
cg01483824	GRIN2D	2906	19	48945886	-3.71193	0.000220506	0.0382015	1.15826	0.247007	0.8934
cg02776514	TECTA	7007	11	121028926	-3.7109	0.00022139	0.038308	-0.121468	0.903342	0.990341
cg12192691		0	7	27291695	-3.71049	0.000221744	0.0383227	NA	NA	NA
cg01298284	UBE2MP1	606551	16	34404774	-3.70881	0.000223194	0.0385265	-0.117634	0.906379	0.991041
cg20747455	MATN4	8785	20	43933383	-3.70832	0.000223619	0.0385532	-0.318161	0.750423	0.993451
cg08051013		0	7	47092955	-3.70651	0.000225192	0.0387774	NA	NA	NA
cg00760935	DCHS2	54798	4	155411351	-3.70646	0.000225235	0.038738	-1.80263	0.0717201	0.621749
cg00947782	RNF39	80352	6	30039142	-3.70551	0.000226063	0.0388335	-0.755302	0.45023	0.965132
cg02350535	FGFR3	2261	4	1800191	-3.7047	0.000226777	0.0389092	-0.913013	0.361436	0.947255
cg08749305		0	6	106441987	-3.7032	0.000228102	0.0390894	NA	NA	NA
cg06511917	PTF1A	256297	10	23482255	-3.70278	0.000228473	0.039106	0.923532	0.355932	0.947297
cg04057238		0	5	71713446	-3.70264	0.000228597	0.0390802	NA	NA	NA
cg08819417	FAM100A	124402	16	4659349	-3.70053	0.000230473	0.0393537	0.0652004	0.948026	0.994225
cg09962952	SH2D3A	10045	19	6753024	-3.69934	0.000231536	0.0394878	-2.41931	0.0157114	0.313779
cg06469345	DRD5	1816	4	9783246	-3.69923	0.000231633	0.0394571	0.639825	0.522419	0.979222
cg03457195		0	2	162284206	-3.69835	0.000232424	0.0395446	NA	NA	NA
cg23111837		0	11	129902845	-3.69808	0.000232665	0.0395383	NA	NA	NA
cg04843660	OBSCN	84033	1	228468399	-3.69716	0.000233497	0.0396324	0.424448	0.671322	0.992187
cg25186965		0	18	72799946	-3.69654	0.000234051	0.0396792	NA	NA	NA
cg04606861	GALNT9	50614	12	132905735	-3.6961	0.000234454	0.0397002	2.27188	0.023286	0.38558
cg12089570	ZNF177	7730	19	9473715	-3.69558	0.000234923	0.0397324	-1.64251	0.100771	0.695063
cg21113740	ELTD1	64123	1	79472343	-3.69499	0.000235465	0.0397768	-2.54055	0.0112045	0.260509
cg06862374	WNT6	7475	2	219736549	-3.69395	0.00023641	0.0398891	-0.419722	0.674771	0.990776
cg10346212		0	19	384389	-3.69387	0.000236487	0.0398549	NA	NA	NA
cg23878564	TNK1	8711	17	7287449	-3.69194	0.000238258	0.0401059	-2.58046	0.00999549	0.241262
cg06616729		0	8	55379248	-3.68825	0.000241671	0.0406324	NA	NA	NA
cg05872614		0	16	55365815	-3.68402	0.000245657	0.0412539	NA	NA	NA
cg07139762	ZNF334	55713	20	45142244	-3.68303	0.000246592	0.0413621	1.09947	0.271803	0.908898
cg17098147	SPAG6	9576	10	22634142	-3.68194	0.000247629	0.0414872	-0.0230474	0.981617	0.999986
cg04875128	OTUD7A	161725	15	31775895	-3.681	0.000248525	0.0415884	-0.587579	0.556936	0.98202
cg25432738	CRYL1	51084	13	21009861	-3.67855	0.000250888	0.0418854	1.79067	0.0736218	0.626172
cg12687157	MARVELD2	153562	5	68710912	-3.6772	0.000252199	0.0420549	-0.728857	0.466244	0.969097
cg26726589	SOX12	6666	20	306364	-3.67705	0.00025234	0.0420292	-1.6752	0.0941799	0.677767
cg12197457	SLC22A1	6580	6	160554674	-3.67692	0.000252469	0.0420016	1.89956	0.0577526	0.575282
cg16065538	TMEM132E	124842	17	32964615	-3.67642	0.000252948	0.0420322	0.736429	0.461627	0.968746
cg00983904	IFFO1	25900	12	6665288	-3.67597	0.000253395	0.0420574	-0.180754	0.856594	0.992669
cg05658491	FMN2	56776	1	240256014	-3.67538	0.000253972	0.0420551	0.583217	0.559867	0.982654
cg05962382		0	2	130345044	-3.67527	0.000254074	0.0420231	NA	NA	NA
cg00988491	BASP1	10409	5	17275894	-3.67406	0.000255263	0.0421219	-0.319234	0.749609	0.993478
cg23178550		0	7	27127576	-3.67273	0.000256569	0.0422885	NA	NA	NA
cg17070539	DAZL	1618	3	16647103	-3.67137	0.000257918	0.0424617	-0.631901	0.527583	0.979832
cg10542584	FEZF2	55079	3	62356223	-3.66969	0.000259588	0.0426872	-0.863539	0.38803	0.953987
cg03301848		0	6	137810203	-3.66863	0.000260648	0.0427136	NA	NA	NA
cg07750130		0	7	1708114	-3.66853	0.000260748	0.0426809	NA	NA	NA
cg25301532	KCNK15	60598	20	43378953	-3.66705	0.000262233	0.0428746	-0.602266	0.547121	0.981899
cg16337457	CANT1	124583	17	76989680	-3.66655	0.000262742	0.0429086	0.448277	0.654042	0.98954
cg12457238		0	10	102499150	-3.66518	0.000264122	0.0430846	NA	NA	NA
cg11849086	LOC146880	0	17	62776530	-3.66496	0.00026435	0.0430724	NA	NA	NA
cg25283841	LOC728661;CDK11B	0	1	1600982	-3.6649	0.000264412	0.0430333	NA	NA	NA
cg04234014	ELAVL3	1995	19	11565385	-3.66438	0.000264938	0.0430697	-0.596617	0.550886	0.982041
cg06076931	GLB1L2	89944	11	134231728	-3.66254	0.000266817	0.0433257	-0.665864	0.505638	0.977161
cg02389040		0	6	31650786	-3.66236	0.000266997	0.0433055	NA	NA	NA
cg25729795	FLJ30058	0	X	130216901	-3.66146	0.000267927	0.0434069	NA	NA	NA
cg13933080	SPAG6	9576	10	22634145	-3.66092	0.000268476	0.0434464	-0.0230474	0.981617	0.999986
cg06874403		0	10	21799047	-3.65892	0.000270543	0.0437312	NA	NA	NA
cg07167423	TFAP2E	339488	1	36042986	-3.65766	0.000271852	0.043893	-1.24088	0.214914	0.860462
cg16450590		0	2	175209075	-3.65724	0.000272291	0.0439141	NA	NA	NA
cg03152500	PROCR	10544	20	33762673	-3.65637	0.000273202	0.0440112	0.753674	0.451206	0.96559
cg00964997		0	4	13531195	-3.65604	0.000273544	0.0440165	NA	NA	NA
cg22067527	RFX2	5990	19	6024987	-3.65441	0.000275267	0.0442437	0.704932	0.481002	0.973104
cg15044957	KCNA4	3739	11	30038672	-3.65437	0.000275305	0.0442	0.238125	0.811829	0.994696
cg14631386		0	8	93114305	-3.65424	0.000275438	0.0441715	NA	NA	NA
cg15325373	EMX2;EMX2OS	2018	10	119302275	-3.65135	0.000278508	0.0445135	-1.20619	0.228004	0.874986
cg17486097	UNC5D	137970	8	35093411	-3.65135	0.000278508	0.0445135	0.55174	0.581238	0.98557
cg11456145	CDC42EP5	148170	19	54976756	-3.65077	0.000279131	0.044563	-0.946654	0.344023	0.94414
cg16084133		0	22	28074146	-3.64822	0.000281858	0.044948	NA	NA	NA
cg18336674	TLX3	30012	5	170735264	-3.64822	0.000281859	0.0448979	0.896306	0.370285	0.95064
cg00759803	ACSF3	197322	16	89186454	-3.64809	0.000282005	0.0448709	0.979884	0.327359	0.935027
cg18120446		0	4	13531076	-3.64661	0.000283598	0.045074	NA	NA	NA
cg04651603		0	12	54321302	-3.64569	0.000284605	0.0451837	NA	NA	NA
cg07645844	ADRA1A	148	8	26722635	-3.64138	0.000289325	0.0458819	5.36632	9.79559e-08	2.04506e-05
cg02609692	LMX1B	4010	9	129389125	-3.63863	0.00029238	0.0463147	-1.59506	0.110985	0.717613
cg23159693	PCDHGA2;PCDHGA3;PCDHGA1	56113	5	140725696	-3.6383	0.000292746	0.0463212	0.107824	0.914155	0.99162
cg00927594	LRRK1	79705	15	101514299	-3.63714	0.000294049	0.0464757	0.129919	0.896655	0.990247
cg07780543		0	12	22094750	-3.63703	0.000294168	0.046443	NA	NA	NA
cg22622477	HOXB7	3217	17	46685442	-3.63646	0.000294808	0.0464925	-2.66946	0.00770921	0.204078
cg10657141	HOXA11AS;HOXA11	221883	7	27225543	-3.63558	0.000295803	0.0465978	-0.919383	0.358097	0.946837
cg16530956	ZFP64	55734	20	50769162	-3.63465	0.00029685	0.0467111	-0.55499	0.579015	0.985098
cg14298200		0	8	65498812	-3.63457	0.000296946	0.0466746	NA	NA	NA
cg01243892	OPRD1	4985	1	29189934	-3.63431	0.000297238	0.046669	-1.29125	0.19689	0.849972
cg17174023	KLHDC7B	113730	22	50987453	-3.63417	0.000297397	0.0466425	-0.364234	0.715753	0.991634
cg00029640	USF2	7392	19	35770141	-3.63411	0.00029746	0.0466011	1.43821	0.150658	0.783911
cg09144226	C5orf52	100190949	5	157099032	-3.63327	0.000298419	0.0466999	1.44271	0.149386	0.782924
cg04097639	NR5A2	2494	1	200009830	-3.6329	0.000298838	0.0467142	1.46809	0.142365	0.769221
cg04499325	EPDR1	54749	7	37960317	-3.632	0.000299867	0.0468236	1.18075	0.237958	0.883873
cg02900978	KBTBD5	131377	3	42727843	-3.63136	0.000300594	0.0468857	-0.29379	0.768974	0.99492
cg06502165	LATS2	26524	13	21562238	-3.63136	0.000300595	0.0468346	-0.550188	0.582302	0.985229
cg21283340	MYO10	4651	5	16701575	-3.63052	0.000301563	0.0469341	-1.82296	0.0685808	0.614526
cg16006626	TPCN2	219931	11	68849960	-3.6297	0.000302502	0.0470288	2.30253	0.0214911	0.370082
cg16172026	MAEA	10296	4	1333663	-3.62912	0.000303176	0.0470822	0.272926	0.784962	0.994386
cg24641254	KIF26B	55083	1	245848637	-3.62837	0.000304047	0.047166	-3.11454	0.00188998	0.0805768
cg08362273		0	17	46719577	-3.62763	0.000304902	0.0472472	NA	NA	NA
cg22942200	AKAP12	9590	6	151560992	-3.627	0.000305637	0.0473096	0.696757	0.486102	0.972829
cg06371836	C20orf56	140828	20	22559867	-3.62582	0.000307003	0.047418	3.31287	0.000953504	0.0491334
cg04267526		0	10	109674297	-3.62552	0.000307352	0.0474205	NA	NA	NA
cg03774514	FOXA2	3170	20	22563702	-3.62454	0.000308506	0.047547	1.46827	0.142317	0.769163
cg22344745		0	1	227746294	-3.62428	0.000308811	0.0475425	NA	NA	NA
cg21186888	UNC80	285175	2	210674232	-3.62181	0.000311723	0.047939	0.0186232	0.985145	1.00021
cg01150683		0	10	111216646	-3.62174	0.000311813	0.0479011	NA	NA	NA
cg20638467	KCTD15	79047	19	34302382	-3.62107	0.000312607	0.0479714	-0.699908	0.484133	0.973408
cg26466587	MCHR2	84539	6	100442120	-3.62097	0.000312717	0.0479366	2.01489	0.0441593	0.510428
cg19949931	PKD1;MIR1225	5310	16	2141745	-3.61923	0.0003148	0.048204	1.71578	0.0864839	0.662651
cg04878701		0	15	95870054	-3.61846	0.000315721	0.0482931	NA	NA	NA
cg06282524		0	X	139593371	-3.61745	0.000316935	0.0484268	NA	NA	NA
cg19657174	TBX1	6899	22	19746268	-3.61627	0.000318348	0.0485906	-0.0156728	0.987498	0.999841
cg03936104	C10orf41	100131213	10	77164747	-3.61306	0.000322256	0.0491344	-0.205179	0.837471	0.992197
cg00462007		0	4	582634	-3.61285	0.000322511	0.0491207	NA	NA	NA
cg13644317		0	18	70536461	-3.61282	0.000322547	0.0490737	NA	NA	NA
cg26979504	HHEX	3087	10	94451518	-3.61218	0.00032333	0.0491403	2.26394	0.0237716	0.386666
cg09322259		0	6	106434131	-3.61171	0.000323909	0.0491758	NA	NA	NA
cg11312613	PPARA	5465	22	46610390	-3.61109	0.000324675	0.0492396	0.797606	0.425271	0.961609
cg16225703	LPHN3	23284	4	62383028	-3.60923	0.000326964	0.049534	-0.132654	0.894491	0.990125
cg06306198	ZIC1	7545	3	147128998	-3.60918	0.000327038	0.0494926	-0.158353	0.874208	0.991797
cg10116505	GRIN2A	2903	16	10274064	-3.60866	0.000327673	0.049536	-2.88099	0.00404129	0.130735
cg06777813	LASS3	204219	15	101085111	-3.60833	0.000328084	0.0495456	-2.13077	0.0333295	0.448475
cg08979319	SIM1	6492	6	100896055	-3.60698	0.000329764	0.0497465	-1.70186	0.0890648	0.667031
cg20842326	PTPRN2	5799	7	157476887	-3.60672	0.000330096	0.0497439	0.271004	0.786439	0.993585
cg15399533	NR2E1	7101	6	108497995	-3.6062	0.000330749	0.0497896	-0.566914	0.570888	0.983502
cg09044154		0	16	88155775	-3.60562	0.000331472	0.0498458	NA	NA	NA
cg03957481	KLHDC7B	113730	22	50986962	-3.60549	0.000331631	0.0497646	-0.364234	0.715753	0.991634
cg25431463	SRC	6714	20	36012946	-3.60472	0.000332597	0.049857	0.965188	0.334663	0.940241
cg12824782	C5orf38	153571	5	2753928	-3.60442	0.00033298	0.0498619	-0.84058	0.400766	0.956051
cg13230186		0	13	114743606	-3.60425	0.00033319	0.049841	NA	NA	NA
cg16803596	GATA4	2626	8	11561498	-3.60302	0.000334746	0.0500212	3.63244	0.000293694	0.0201613
cg17078116	NEFM	4741	8	24772344	-3.60255	0.000335342	0.0500577	-2.25452	0.0243593	0.390269
cg26130488		0	17	59530104	-3.60096	0.000337375	0.0503084	NA	NA	NA
cg09643136		0	2	223176683	-3.60061	0.000337812	0.0503209	NA	NA	NA
cg23801028	CRTAC1	55118	10	99791308	-3.599	0.000339882	0.0505764	-1.27479	0.202652	0.855694
cg25923609		0	5	3607092	-3.59743	0.000341897	0.0508231	NA	NA	NA
cg12238853		0	7	62575098	-3.59525	0.000344734	0.0511914	NA	NA	NA
cg07595776		0	5	77253990	-3.59406	0.000346286	0.0513683	NA	NA	NA
cg05708114	ARID3C	138715	9	34624587	-3.59404	0.000346309	0.0513182	0.0104351	0.991676	0.999027
cg03811891		0	6	158937286	-3.59223	0.000348688	0.0516171	NA	NA	NA
cg13080565	GRIK2	2898	6	101846797	-3.59175	0.000349314	0.051656	-0.0551013	0.956068	0.995595
cg00610844	LOC255167	0	5	6583797	-3.59012	0.000351469	0.0519208	NA	NA	NA
cg09159022	CSMD1	64478	8	4849522	-3.58907	0.000352864	0.0520729	0.764458	0.444758	0.96381
cg01250212	GNG7	2788	19	2650755	-3.589	0.000352963	0.0520335	-0.418812	0.675435	0.990459
cg00853940	TRPM8	79054	2	234847683	-3.58797	0.000354329	0.0521809	0.791212	0.428991	0.962496
cg11418477	SP9	100131390	2	175199741	-3.58764	0.000354782	0.0521936	-0.309161	0.757258	0.993343
cg20255094	LY9	4063	1	160771763	-3.58681	0.000355893	0.052303	0.8712	0.383835	0.954333
cg18483289	SCRT2	85508	20	644897	-3.58595	0.000357042	0.0524178	-0.478249	0.632568	0.988513
cg23993425	FAM43B	163933	1	20880591	-3.58355	0.000360285	0.0528395	-2.69704	0.00710281	0.194904
cg24792717	PCDHA6;PCDHA2;PCDHA1;PCDHA7;PCDHA5;PCDHA9;PCDHA3;PCDHA4;PCDHA8	56142	5	140229827	-3.58338	0.000360522	0.0528198	-0.289377	0.772347	0.994393
cg04374393	SOX14	8403	3	137483503	-3.5827	0.000361436	0.052845	-0.471468	0.6374	0.989573
cg26654798	BNC1	646	15	83953864	-3.58192	0.000362502	0.0529465	0.410926	0.681207	0.991314
cg17658634	NRN1	51299	6	6002543	-3.57936	0.000366019	0.0533507	-2.9597	0.00314537	0.113542
cg23231268		0	3	46792462	-3.57762	0.000368421	0.0536459	NA	NA	NA
cg20802515	SPO11	23626	20	55904768	-3.57743	0.000368684	0.0536294	-0.192132	0.847674	0.992269
cg01807768		0	6	10391097	-3.57704	0.000369218	0.0536523	NA	NA	NA
cg12049769		0	17	77610297	-3.5756	0.000371223	0.0538886	NA	NA	NA
cg17717124	TCL1A	8115	14	96180847	-3.57516	0.000371848	0.0539244	2.07315	0.0383905	0.476085
cg09026213		0	2	58478744	-3.57398	0.000373498	0.0540536	NA	NA	NA
cg15724256	EN1	2019	2	119602857	-3.57396	0.000373528	0.054003	-1.54085	0.12364	0.740562
cg06532268		0	6	25732817	-3.57313	0.000374692	0.0541164	NA	NA	NA
cg20482698	ACTN2	88	1	236849994	-3.57291	0.000375008	0.0541072	-0.503462	0.61474	0.98724
cg01025233		0	5	72732060	-3.5728	0.000375155	0.0540736	NA	NA	NA
cg01609081	CTBP1	1487	4	1232000	-3.57254	0.000375529	0.0540728	0.482074	0.62985	0.987771
cg09677268	ZSCAN1	284312	19	58556044	-3.57202	0.000376252	0.0541221	-2.1697	0.0302432	0.428291
cg25638611	SHANK2	22941	11	70508420	-3.57108	0.000377592	0.0542601	-1.12771	0.259687	0.898347
cg25753631		0	6	25732923	-3.57012	0.000378946	0.0543998	NA	NA	NA
cg23442637	PCDHB18	54660	5	140615649	-3.56867	0.000381025	0.0546431	-1.06532	0.286964	0.920531
cg11687036		0	3	147139563	-3.56844	0.000381346	0.0546341	NA	NA	NA
cg15577180	PRKAR1B	5575	7	611487	-3.56702	0.000383387	0.0548713	0.392257	0.694944	0.992057
cg16865965	VAMP5	10791	2	85811662	-3.567	0.000383418	0.0548207	-0.383449	0.701461	0.991158
cg11215976	ACTN2	88	1	236849942	-3.56663	0.000383949	0.0548416	-0.503462	0.61474	0.98724
cg03670355	CLCN4	1183	X	10126353	-3.56639	0.000384288	0.054835	0.469763	0.638617	0.98949
cg11179621		0	15	93652950	-3.5661	0.000384707	0.0548398	NA	NA	NA
cg03711016	SHISA9	729993	16	12997684	-3.56609	0.000384725	0.0547875	-3.04018	0.00242025	0.0930027
cg00901320	GLT1D1	144423	12	129338534	-3.56608	0.000384742	0.0547352	1.29081	0.197039	0.849892
cg04677846	C21orf33	8209	21	45560806	-3.5653	0.000385864	0.0548401	-0.679391	0.497033	0.97288
cg02707176	PCDHGA4;PCDHGA9;PCDHGA1;PCDHGB1;PCDHGB7;PCDHGB6;PCDHGB3;PCDHGA6;PCDHGA8;PCDHGA10;PCDHGA5;PCDHGB4;PCDHGA3;PCDHGA2;PCDHGB2;PCDHGA7;PCDHGB5	56111	5	140798758	-3.56439	0.000387183	0.0549727	-0.904295	0.366037	0.948633
cg23015041	PRAGMIN	157285	8	8176714	-3.56439	0.000387184	0.054918	1.13683	0.255859	0.897988
cg14517056	TNRC18	84629	7	5428633	-3.56418	0.000387492	0.054907	-0.0122083	0.990262	0.999541
cg02409177	ADRA1A	148	8	26721870	-3.5638	0.000388042	0.0549303	5.36632	9.79559e-08	2.04506e-05
cg21980338	ZNF141	7700	4	331929	-3.56364	0.000388285	0.0549101	0.734475	0.462816	0.968631
cg21694941	PENK	5179	8	57358590	-3.56355	0.000388415	0.054874	-0.901003	0.367784	0.948909
cg06148812	TBX1	6899	22	19746368	-3.56328	0.000388808	0.0548751	-0.0156728	0.987498	0.999841
cg22541254	GRIK2	2898	6	101846779	-3.56199	0.000390687	0.0550857	-0.0551013	0.956068	0.995595
cg03998119	PTPN21	11099	14	88945315	-3.56077	0.000392484	0.0552843	-1.04514	0.296188	0.924636
cg02921624	LOC643719	0	19	35068788	-3.56063	0.000392679	0.0552572	NA	NA	NA
cg09351308	MVD	4597	16	88722447	-3.56005	0.000393536	0.0553231	0.768706	0.442233	0.965258
cg08663109		0	22	20342562	-3.5592	0.000394791	0.0554448	NA	NA	NA
cg05897008		0	3	138647715	-3.55876	0.000395436	0.0554806	NA	NA	NA
cg15726426	KCNA3	3738	1	111216839	-3.55783	0.000396828	0.0556211	1.14368	0.253007	0.896525
cg17012160	FMN2	56776	1	240255691	-3.5574	0.000397459	0.0556548	0.583217	0.559867	0.982654
cg04427498		0	7	20830657	-3.55734	0.000397546	0.0556123	NA	NA	NA
cg25285904		0	18	73628634	-3.55703	0.000398007	0.0556222	NA	NA	NA
cg03343571	RNF39	80352	6	30039175	-3.55691	0.00039819	0.0555932	-0.755302	0.45023	0.965132
cg20457796	SLC18A3;CHAT	6572	10	50819500	-3.55636	0.000399005	0.0556524	0.548239	0.583639	0.985843
cg20435535		0	6	31651151	-3.55611	0.000399379	0.0556501	NA	NA	NA
cg03413208		0	3	160879619	-3.55579	0.000399865	0.0556633	NA	NA	NA
cg00702719		0	6	74025019	-3.55421	0.000402238	0.055939	NA	NA	NA
cg18348654		0	18	19476864	-3.55369	0.000403024	0.0559936	NA	NA	NA
cg24213437	RGL3	57139	19	11529741	-3.55334	0.000403547	0.0560116	0.366901	0.713763	0.991115
cg19556473		0	19	37894856	-3.5525	0.000404809	0.0561321	NA	NA	NA
cg19414591		0	1	91190582	-3.55246	0.00040487	0.0560859	NA	NA	NA
cg26492368	SPAG6	9576	10	22634733	-3.55237	0.000405005	0.0560501	-0.0230474	0.981617	0.999986
cg25002056	ADAMTS17	170691	15	100533336	-3.55236	0.000405025	0.0559984	-1.27288	0.20333	0.856057
cg26243203	B3GNTL1	146712	17	80976036	-3.55078	0.00040742	0.0562749	0.310652	0.756124	0.993658
cg18724069		0	5	39721760	-3.54856	0.000410816	0.056689	NA	NA	NA
cg08318283		0	15	73611202	-3.54844	0.000410999	0.0566594	NA	NA	NA
cg13536703	SHANK2	22941	11	70332724	-3.54798	0.000411705	0.0567018	-1.12771	0.259687	0.898347
cg09044186	APOA5	116519	11	116661388	-3.5475	0.000412455	0.0567502	3.71257	0.00021545	0.0156945
cg16407471	MIR129-2	406918	11	43602914	-3.54687	0.000413417	0.0568277	NA	NA	NA
cg19866866	ZNF648	127665	1	182026044	-3.54628	0.000414339	0.0568995	-0.321934	0.747564	0.993172
cg08319905	PPFIA3	8541	19	49636270	-3.54568	0.00041527	0.0569724	-0.0115433	0.990792	0.999528
cg21278164	LEFTY2	7044	1	226127694	-3.54373	0.000418289	0.0573314	-1.49513	0.135168	0.759516
cg14218481		0	19	38281219	-3.54311	0.000419264	0.0574097	NA	NA	NA
cg07676093	LTBP3;SCYL1	4054	11	65306116	-3.54133	0.000422063	0.0576821	1.62021	0.105474	0.704468
cg24265865	ELK1	2002	X	47497341	-3.54113	0.000422373	0.0576691	1.40637	0.159895	0.801297
cg22871908		0	1	111323421	-3.54106	0.000422484	0.057629	NA	NA	NA
cg11869150	EXOC3	11336	5	465665	-3.54012	0.000423969	0.0577762	1.05542	0.291467	0.920683
cg25283465		0	1	111323341	-3.5401	0.000424005	0.0577259	NA	NA	NA
cg03625109	DBC1	1620	9	122132103	-3.53987	0.000424367	0.05772	-1.33449	0.18232	0.831944
cg03901660		0	1	221050459	-3.5396	0.000424792	0.0577227	NA	NA	NA
cg15377283	SOX17	64321	8	55371369	-3.53947	0.000424993	0.0576949	-2.85208	0.00442474	0.139355
cg11889808	PTPRN2	5799	7	157483448	-3.53848	0.000426571	0.057854	0.271004	0.786439	0.993585
cg08979895	PITX2	5308	4	111540126	-3.53787	0.000427541	0.0579304	-2.22952	0.0259806	0.400405
cg06418871	MARVELD2	153562	5	68710831	-3.53773	0.000427766	0.0579058	-0.728857	0.466244	0.969097
cg05257635		0	13	44543954	-3.53714	0.000428696	0.0579766	NA	NA	NA
cg23676956		0	2	105853157	-3.53689	0.000429104	0.0579767	NA	NA	NA
cg00118365	PCDHGA4;PCDHGB5;PCDHGA6;PCDHGA1;PCDHGA8;PCDHGA5;PCDHGB1;PCDHGB4;PCDHGA3;PCDHGA2;PCDHGA7;PCDHGB2;PCDHGB3	56111	5	140779112	-3.53671	0.000429384	0.0579595	-0.904295	0.366037	0.948633
cg04972745		0	10	101287846	-3.53662	0.000429536	0.0579251	NA	NA	NA
cg20806040	ATP11A	23250	13	113497607	-3.53601	0.000430506	0.058001	0.0118716	0.99053	0.999413
cg10035234	SLC6A19	340024	5	1212554	-3.536	0.000430532	0.0579497	1.54194	0.123376	0.740075
cg09557462	ADRA1A	148	8	26721736	-3.53572	0.000430976	0.0579547	5.36632	9.79559e-08	2.04506e-05
cg19963589	SSBP3	23648	1	54822103	-3.53555	0.000431239	0.0579353	1.83526	0.0667371	0.609055
cg22866681	MYLK4	340156	6	2685401	-3.53213	0.000436774	0.0585684	-1.33284	0.182862	0.832352
cg10395685	CCDC81	60494	11	86085715	-3.53053	0.00043938	0.0588625	0.237811	0.812072	0.994573
cg01446287	ANKRD33B	651746	5	10649381	-3.53026	0.000439819	0.0588659	NA	NA	NA
cg09317884	LMX1A	4009	1	165204512	-3.52944	0.000441161	0.0589901	-2.16952	0.0302565	0.428179
cg21811143	EN1	2019	2	119599748	-3.52942	0.000441204	0.0589405	-1.54085	0.12364	0.740562
cg20939662	LHX2	9355	9	126777160	-3.52932	0.000441367	0.058907	-0.359465	0.719316	0.991889
cg22399984		0	6	1601802	-3.52833	0.000442983	0.0590673	NA	NA	NA
cg19721055		0	19	12753329	-3.52719	0.000444874	0.0592086	NA	NA	NA
cg22160472		0	5	42944494	-3.52509	0.000448359	0.0596167	NA	NA	NA
cg02106850	TBX18	9096	6	85474093	-3.52494	0.000448609	0.0595943	-2.19172	0.0286088	0.416803
cg07057579		0	15	95870112	-3.52424	0.000449776	0.0596936	NA	NA	NA
cg11348249	AKAP12	9590	6	151560831	-3.52396	0.000450246	0.0597004	0.696757	0.486102	0.972829
cg18254983	KLK15	55554	19	51330299	-3.52394	0.000450269	0.0596479	-0.220617	0.825432	0.992331
cg22974228	ALX4	60529	11	44332685	-3.5228	0.000452186	0.0598461	-0.327898	0.743051	0.993171
cg14010550	GRIN3B	116444	19	1009642	-3.52236	0.000452922	0.0598879	-0.78176	0.434524	0.964228
cg10343742	SOX14	8403	3	137483506	-3.52221	0.000453172	0.0598654	-0.471468	0.6374	0.989573
cg01550017		0	5	42924215	-3.52161	0.000454193	0.0599446	NA	NA	NA
cg17162576	SGIP1	84251	1	66999059	-3.52054	0.000455989	0.0601259	-5.37352	9.42171e-08	1.98749e-05
cg00984060	CACNA1I	8911	22	40081520	-3.5204	0.000456234	0.0601026	-0.429855	0.667385	0.991215
cg14196676	KIAA1751	85452	1	1911069	-3.5187	0.000459109	0.0604254	-1.27027	0.204256	0.857105
cg26829101	SRRM4	84530	12	119592094	-3.51716	0.000461738	0.0607153	0.186584	0.852021	0.992766
cg18206481	LMX1A	4009	1	165204502	-3.51549	0.000464617	0.0610376	-2.16952	0.0302565	0.428179
cg13867669	APBA1	320	9	72130914	-3.51492	0.000465592	0.0609968	0.589352	0.555746	0.981975
cg12405983	ZSCAN18	65982	19	58630240	-3.51329	0.000468414	0.0613101	-1.29531	0.195486	0.848069
cg24140841	KCNG2	26251	18	77642911	-3.51202	0.000470618	0.0615421	-0.934283	0.350363	0.948049
cg02577267	GREM2	64388	1	240656513	-3.51094	0.000472517	0.0617337	-2.12852	0.0335154	0.449187
cg21214293		0	5	145713882	-3.51074	0.000472852	0.0617208	NA	NA	NA
cg17759252	CRTC1	23373	19	18888081	-3.51073	0.000472875	0.0616673	1.97949	0.0480098	0.529545
cg16498194	FZD10	11211	12	130647874	-3.50992	0.000474305	0.0617972	-0.736042	0.461862	0.968739
cg18770350	ACTN2	88	1	236849966	-3.50959	0.000474883	0.0617595	-0.503462	0.61474	0.98724
cg17294725	UNCX	340260	7	1272559	-3.50944	0.000475134	0.0617358	-0.219221	0.826519	0.992224
cg20779964	CBLN4	140689	20	54580070	-3.50903	0.000475862	0.061774	-3.46804	0.000544535	0.0323384
cg14253517	PCDHGA4;PCDHGA11;PCDHGA9;PCDHGA1;PCDHGB1;PCDHGB6;PCDHGA12;PCDHGB3;PCDHGB7;PCDHGA6;PCDHGA8;PCDHGA10;PCDHGA5;PCDHGB4;PCDHGA3;PCDHGA2;PCDHGA7;PCDHGB2;PCDHGB5	56111	5	140810726	-3.50871	0.00047643	0.0617914	-0.904295	0.366037	0.948633
cg18649737	WDR20	91833	14	102680518	-3.50869	0.000476453	0.0617382	0.0577919	0.953925	0.995205
cg15996534	LOC134466	0	5	150325954	-3.50808	0.00047754	0.0618228	NA	NA	NA
cg00808170	PCDHGA4;PCDHGA11;PCDHGA9;PCDHGA1;PCDHGB1;PCDHGB8P;PCDHGB6;PCDHGB3;PCDHGB7;PCDHGA6;PCDHGA8;PCDHGA10;PCDHGA5;PCDHGB4;PCDHGA3;PCDHGA2;PCDHGB2;PCDHGA7;PCDHGB5	56111	5	140807787	-3.50752	0.000478527	0.0618381	-0.904295	0.366037	0.948633
cg22240715	C7orf27	221927	7	2583261	-3.50676	0.000479866	0.0619549	0.633684	0.526419	0.979646
cg13234863	TMEM132D	121256	12	130389138	-3.50652	0.000480303	0.0619552	-0.41889	0.675379	0.990663
cg24301620	GRIK2	2898	6	101846872	-3.50597	0.000481287	0.0620259	-0.0551013	0.956068	0.995595
cg21946667	CNTNAP1	8506	17	40839643	-3.50547	0.000482164	0.0620828	0.332819	0.739335	0.99279
cg01097725	PCDHB4	56131	5	140503221	-3.50468	0.000483585	0.0622095	-1.2509	0.211236	0.860365
cg06330901	PCDHB9	56127	5	140568845	-3.50465	0.000483631	0.0621592	-1.80891	0.0707379	0.619599
cg20098478	WIF1	11197	12	65515862	-3.50392	0.000484931	0.0622701	-1.76497	0.0778457	0.637982
cg11071207	ALX3	257	1	110611218	-3.50294	0.000486694	0.0624402	0.789001	0.430281	0.963045
cg14534701		0	5	122971865	-3.50269	0.000487143	0.0624416	NA	NA	NA
cg08044097	SOX17	64321	8	55371013	-3.5022	0.000488026	0.0624985	-2.85208	0.00442474	0.139355
cg04255230	LBX2	85474	2	74727010	-3.50164	0.000489039	0.0625719	0.792504	0.428238	0.96294
cg02281446	OBSCN	84033	1	228462007	-3.50109	0.00049003	0.0626425	0.424448	0.671322	0.992187
cg01509141	CCDC122;C13orf31	160857	13	44453359	-3.5006	0.000490926	0.0627007	1.2873	0.198259	0.850443
cg02163322	FGFRL1	53834	4	1017759	-3.49918	0.000493504	0.0629735	0.602433	0.54701	0.981873
cg02304584		0	6	31650790	-3.49876	0.000494276	0.0630155	NA	NA	NA
cg05168012		0	2	102867275	-3.49841	0.000494905	0.0630393	NA	NA	NA
cg01386424		0	6	100039476	-3.49806	0.000495553	0.0630654	NA	NA	NA
cg06686995	MGAT4B	11282	5	179228489	-3.49801	0.000495632	0.0630192	0.792407	0.428294	0.962854
cg07167946	IRX4	50805	5	1878205	-3.49724	0.000497051	0.0631432	-2.59715	0.00952558	0.234389
cg23625660	FBXL21	26223	5	135266516	-3.49699	0.00049751	0.0631452	0.381933	0.702585	0.991294
cg18593654	UBXN6	80700	19	4446628	-3.49691	0.000497663	0.0631084	0.386334	0.699324	0.992085
cg26816426	JPH1	56704	8	75227811	-3.49657	0.000498277	0.06313	-1.64978	0.0992726	0.691086
cg07847664	PRKAR1B	5575	7	613118	-3.49612	0.000499103	0.0631785	0.392257	0.694944	0.992057
cg00581043		0	6	168106129	-3.49537	0.000500482	0.0632967	NA	NA	NA
cg16115513		0	6	72298527	-3.49502	0.000501131	0.0633226	NA	NA	NA
cg19789417		0	3	149768455	-3.49483	0.000501491	0.0633119	NA	NA	NA
cg03822622	OTUD7A	161725	15	31776450	-3.49447	0.000502154	0.0633395	-0.587579	0.556936	0.98202
cg05722504	PHOX2B	8929	4	41749361	-3.49305	0.000504786	0.0636151	-0.0801908	0.9361	0.994177
cg12860686	C5orf38	153571	5	2753876	-3.49154	0.000507603	0.0639135	-0.84058	0.400766	0.956051
cg06792262	ZNF167	55888	3	44622596	-3.49064	0.000509302	0.0640708	-1.06295	0.288037	0.921054
cg10695429	IGF2BP2	10644	3	185542769	-3.48995	0.00051059	0.0641762	0.505542	0.613279	0.987793
cg09039751	CHST1	8534	11	45672100	-3.48898	0.000512423	0.0643498	-1.09722	0.272785	0.909927
cg10392614		0	2	208977121	-3.48883	0.000512704	0.0643283	NA	NA	NA
cg01554437		0	14	21091422	-3.48746	0.000515294	0.0645964	NA	NA	NA
cg20168823	BRUNOL4	56853	18	34916738	-3.48546	0.000519101	0.0649022	-0.716177	0.474034	0.971429
cg03677126		0	5	537349	-3.48541	0.000519195	0.064857	NA	NA	NA
cg07131540	SOLH	6650	16	587568	-3.48506	0.000519862	0.0648834	0.348053	0.727867	0.991794
cg10591607	GRIK2	2898	6	101846916	-3.48504	0.000519895	0.0648307	-0.0551013	0.956068	0.995595
cg23244910		0	6	106434169	-3.48489	0.000520181	0.0648096	NA	NA	NA
cg06629130		0	18	44787585	-3.48449	0.000520952	0.064849	NA	NA	NA
cg05421550	UBXN6	80700	19	4446485	-3.48263	0.000524522	0.0652363	0.386334	0.699324	0.992085
cg21545862		0	5	174159294	-3.4818	0.000526129	0.0653791	NA	NA	NA
cg13211302		0	8	102236731	-3.48156	0.000526603	0.065381	NA	NA	NA
cg19879265	C14orf80	283643	14	105963772	-3.48125	0.000527203	0.0653984	-0.807247	0.419699	0.960483
cg08206906		0	19	22701260	-3.4805	0.000528644	0.0655201	NA	NA	NA
cg26613361		0	16	31830668	-3.48014	0.00052936	0.0655518	NA	NA	NA
cg07268021	MTUS2	23281	13	30054459	-3.47999	0.000529652	0.065531	0.362369	0.717146	0.991326
cg21158087		0	17	58216415	-3.4799	0.000529814	0.0654941	NA	NA	NA
cg25887010		0	X	53029709	-3.47889	0.000531794	0.0656819	NA	NA	NA
cg24989962	PTGDR	5729	14	52734286	-3.47841	0.000532728	0.0657402	-0.275906	0.782672	0.994472
cg09318162	PPP1R2P1	100507444	6	32847842	-3.4781	0.00053333	0.0657575	NA	NA	NA
cg00665832	TOMM7	54543	7	22862401	-3.47781	0.00053391	0.0657721	0.398518	0.690326	0.99246
cg23397523	PML	5371	15	74315331	-3.47613	0.000537203	0.0661205	-0.944352	0.345197	0.944418
cg24496475		0	4	1400189	-3.47578	0.000537902	0.0661494	NA	NA	NA
cg04080041	PCDHGA4;PCDHGA11;PCDHGA9;PCDHGA1;PCDHGB1;PCDHGB6;PCDHGA12;PCDHGB3;PCDHGB7;PCDHGA6;PCDHGA8;PCDHGA10;PCDHGA5;PCDHGB4;PCDHGA3;PCDHGA2;PCDHGA7;PCDHGB2;PCDHGB5	56111	5	140811253	-3.47492	0.000539596	0.0663005	-0.904295	0.366037	0.948633
cg23085662		0	18	59000860	-3.47486	0.000539717	0.0662582	NA	NA	NA
cg09382002	GRID2IP	392862	7	6590564	-3.47451	0.000540405	0.0662284	1.82073	0.0689198	0.615657
cg24753760	GRIK2	2898	6	101846767	-3.47346	0.000542495	0.0664274	-0.0551013	0.956068	0.995595
cg03943081	TCERG1L	256536	10	133110646	-3.47311	0.000543199	0.0664565	0.779363	0.435933	0.96387
cg16830930	SOX17	64321	8	55371392	-3.47191	0.000545581	0.0666906	-2.85208	0.00442474	0.139355
cg22087053	PCDHGA4;PCDHGB3;PCDHGA1;PCDHGA5;PCDHGB1;PCDHGA3;PCDHGA2;PCDHGB2	56111	5	140751506	-3.47142	0.000546562	0.0667532	-0.904295	0.366037	0.948633
cg16435923	PCDHGA4;PCDHGA2;PCDHGA5;PCDHGB2;PCDHGA1;PCDHGB1;PCDHGA3	56111	5	140744155	-3.47127	0.000546875	0.0667342	-0.904295	0.366037	0.948633
cg24448113	PCDHB2	56133	5	140475611	-3.47119	0.000547027	0.0666956	-1.35279	0.1764	0.825005
cg02317534		0	7	22705333	-3.47081	0.000547785	0.0667309	NA	NA	NA
cg17071589	VSTM2L	128434	20	36572741	-3.47067	0.000548068	0.0666513	-0.690673	0.489917	0.972772
cg05711235		0	8	65498612	-3.47049	0.00054843	0.0666385	NA	NA	NA
cg17001566	PRDM16	63976	1	2990490	-3.47044	0.00054853	0.0665938	-0.611728	0.540844	0.980716
cg23948204		0	5	145758586	-3.47042	0.000548579	0.066543	NA	NA	NA
cg07198552	CDH4	1002	20	59828977	-3.4701	0.000549221	0.0665642	-0.557847	0.577063	0.985171
cg12739761	QTRT1	81890	19	10823877	-3.46965	0.000550134	0.0666181	0.242331	0.808569	0.994614
cg18044383		0	18	59001158	-3.46934	0.000550754	0.0666366	NA	NA	NA
cg23414876	HSF4;FBXL8	3299	16	67197396	-3.46933	0.000550777	0.0665828	1.4996	0.134004	0.757175
cg17739181	FAM129B	64855	9	130271384	-3.46572	0.000558107	0.0672975	-0.101418	0.919237	0.991926
cg11280525	LOC645323	0	5	87955695	-3.46567	0.000558211	0.0672531	NA	NA	NA
cg13352894	SLC25A22	79751	11	792205	-3.46365	0.00056235	0.0676945	0.0286281	0.977166	0.99892
cg20639618		0	4	183729073	-3.46313	0.000563415	0.0677654	NA	NA	NA
cg08452456	TBKBP1	9755	17	45786439	-3.46269	0.00056433	0.0678182	-0.222907	0.823649	0.992663
cg00650641		0	7	27127752	-3.46233	0.00056508	0.0678511	NA	NA	NA
cg10116490	PTCHD2	57540	1	11561711	-3.46213	0.000565494	0.0678436	-0.625298	0.531905	0.979683
cg17353893	CLIP2	7461	7	73753326	-3.46084	0.00056815	0.0681048	-0.29044	0.771534	0.994358
cg27552679	ISLR2	57611	15	74425757	-3.45988	0.000570147	0.0682867	0.369297	0.711978	0.991218
cg19990785	TMEM134	80194	11	67232403	-3.4591	0.000571788	0.0683683	1.1707	0.241972	0.888034
cg04206219		0	6	1602137	-3.45894	0.000572112	0.0683496	NA	NA	NA
cg00017489	DPP6	1804	7	153583318	-3.45804	0.000573995	0.0685171	-0.853881	0.393357	0.954453
cg25749306	PNMAL2	57469	19	46997775	-3.45749	0.00057515	0.0685975	-1.01194	0.311789	0.927989
cg03490331		0	5	172672817	-3.45734	0.000575477	0.068579	NA	NA	NA
cg20829347	SOX1	6656	13	112720927	-3.45646	0.000577319	0.068741	-0.548466	0.583483	0.985991
cg13944175	HAS1	3036	19	52222698	-3.45641	0.000577438	0.0686978	-0.256193	0.79785	0.992949
cg19389293	C18orf1	753	18	13641872	-3.45584	0.000578632	0.0687823	-1.61678	0.106212	0.707068
cg07391831	ALOX12P2	245	17	6797590	-3.45521	0.000579961	0.0688828	-0.160266	0.872701	0.991588
cg10509254	NBLA00301;HAND2	79804	4	174452133	-3.45437	0.000581744	0.069037	-0.424432	0.671334	0.992132
cg16594581	PCDHB6	56130	5	140531865	-3.45371	0.000583165	0.069148	0.710546	0.477516	0.972463
cg04658707		0	21	47453889	-3.45328	0.000584063	0.0691969	NA	NA	NA
cg22599477		0	4	25507245	-3.45185	0.000587137	0.0695033	NA	NA	NA
cg03573945	EBF2	64641	8	25897342	-3.45147	0.000587932	0.0695396	-1.96516	0.049647	0.53909
cg16521917	CNTNAP2	26047	7	145813946	-3.45139	0.000588113	0.0695032	0.239513	0.810752	0.994581
cg13368923		0	6	1379065	-3.45016	0.000590755	0.0697576	NA	NA	NA
cg16942333	JAKMIP3	282973	10	133948645	-3.44985	0.000591418	0.069778	0.00389829	0.99689	0.999952
cg07944494		0	21	44009029	-3.44869	0.000593932	0.0700166	NA	NA	NA
cg19849544		0	8	38508335	-3.44805	0.000595327	0.070123	NA	NA	NA
cg06158650	TBX15	6913	1	119522637	-3.44772	0.000596037	0.0700907	-2.22784	0.0260929	0.400916
cg04365609		0	2	239930900	-3.44611	0.000599539	0.0704443	NA	NA	NA
cg17767099	GRIN3B	116444	19	1009048	-3.44601	0.000599764	0.0704127	-0.78176	0.434524	0.964228
cg03953980	DECR2	26063	16	460365	-3.44527	0.00060139	0.0705454	0.4224	0.672816	0.9915
cg05857999		0	6	31650760	-3.4443	0.000603521	0.0707371	NA	NA	NA
cg14385245	BNC1	646	15	83953765	-3.44359	0.000605086	0.0708622	0.410926	0.681207	0.991314
cg11367939	ADRA2A	150	10	112839302	-3.44342	0.000605446	0.0708461	0.480367	0.631062	0.988065
cg27393010		0	7	121940216	-3.44244	0.00060761	0.0709827	NA	NA	NA
cg06202426	FBXW5	54461	9	139836994	-3.44188	0.000608865	0.0709547	1.71327	0.086945	0.662923
cg25792521	CDK2AP2	10263	11	67275614	-3.44178	0.000609073	0.0709209	1.74633	0.0810335	0.648877
cg04768697	CCDC105	126402	19	15122135	-3.44096	0.000610896	0.0710751	0.279781	0.779698	0.993873
cg18131141	TFAP2E	339488	1	36043002	-3.44051	0.000611908	0.0711347	-1.24088	0.214914	0.860462
cg06980531	FBLL1	345630	5	167957361	-3.44041	0.000612117	0.0711009	-0.834084	0.404415	0.956083
cg08529882		0	10	124902456	-3.4401	0.00061282	0.0711246	NA	NA	NA
cg14047094		0	9	137393257	-3.43967	0.00061377	0.0711189	NA	NA	NA
cg27493965	MAN2B1	4125	19	12767784	-3.43944	0.000614295	0.0711219	0.617994	0.536707	0.979706
cg18536148	TBX4	9496	17	59533844	-3.43872	0.00061589	0.0712486	0.453948	0.649956	0.988825
cg07034850	ID3	3399	1	23885086	-3.4386	0.000616153	0.0712212	-1.25344	0.210313	0.86111
cg00434010	SIM1	6492	6	100903691	-3.4384	0.00061662	0.0712174	-1.70186	0.0890648	0.667031
cg01757548		0	6	170730413	-3.43838	0.000616661	0.0711644	NA	NA	NA
cg14445366		0	17	70112050	-3.43673	0.000620363	0.0715336	NA	NA	NA
cg11932225	AFAP1	60312	4	7802347	-3.43652	0.000620844	0.0715312	0.0463761	0.963019	0.996734
cg14176274	DMRT3	58524	9	977770	-3.43622	0.00062151	0.07155	-1.43587	0.151325	0.785764
cg05756489	HTR7	3363	10	92616870	-3.43581	0.000622442	0.0715994	0.323676	0.746245	0.993178
cg18057109		0	7	156409738	-3.43534	0.000623501	0.0716634	NA	NA	NA
cg21819984	LASS3	204219	15	101084507	-3.43342	0.000627873	0.0720496	-2.13077	0.0333295	0.448475
cg15837280		0	5	135415258	-3.43316	0.000628472	0.0720602	NA	NA	NA
cg13051028	KIAA0664	23277	17	2601071	-3.43305	0.000628717	0.0720303	0.754582	0.450661	0.965342
cg01339959		0	2	184125517	-3.43148	0.000632315	0.0723843	NA	NA	NA
cg01791587	SLC6A17	388662	1	110693985	-3.43084	0.000633793	0.0724952	-2.09222	0.0366473	0.465586
cg04568799		0	3	197840782	-3.43007	0.000635563	0.0725811	NA	NA	NA
cg10308414		0	9	128777758	-3.4283	0.000639658	0.0729902	NA	NA	NA
cg21485303		0	12	22094699	-3.42736	0.000641848	0.0731815	NA	NA	NA
cg26429925	BNC1	646	15	83953775	-3.42688	0.000642963	0.0732499	0.410926	0.681207	0.991314
cg15430659	CNNM1	26507	10	101090558	-3.42605	0.000644893	0.0734111	-1.0081	0.313627	0.929092
cg19512961	GOLGA3	2802	12	133363341	-3.42532	0.000646612	0.073548	-0.428587	0.668308	0.991349
cg25203481	KCNQ1DN	55539	11	2891082	-3.42528	0.000646692	0.0734984	-0.490175	0.624108	0.987562
cg12900314		0	1	21755315	-3.42481	0.000647808	0.0735665	NA	NA	NA
cg08812889		0	4	174439925	-3.42458	0.000648342	0.0735685	NA	NA	NA
cg08814800		0	4	174421377	-3.42398	0.000649751	0.0736697	NA	NA	NA
cg26718707	DIP2C	22982	10	518370	-3.42221	0.000653927	0.0740842	0.126883	0.899056	0.989822
cg17902551	CACNA1C	775	12	2801061	-3.42212	0.000654158	0.0740514	-1.43058	0.152833	0.788141
cg20364025	GALNS	2588	16	88905749	-3.42161	0.000655363	0.0741289	0.0444594	0.964546	0.996583
cg15522957	ALX4	60529	11	44324925	-3.42136	0.000655941	0.0741354	-0.327898	0.743051	0.993171
cg17627654	SHANK2	22941	11	70508410	-3.4211	0.000656575	0.0741482	-1.12771	0.259687	0.898347
cg03747002	GUCY2D	3000	17	7907439	-3.42015	0.000658828	0.0743437	-0.659816	0.50951	0.978017
cg21319932		0	6	1379694	-3.41892	0.000661767	0.0746162	NA	NA	NA
cg17124224	BNC1	646	15	83953880	-3.41886	0.000661904	0.0745726	0.410926	0.681207	0.991314
cg26736812		0	17	48042353	-3.41712	0.000666107	0.0749868	NA	NA	NA
cg20087519	SYCE1	93426	10	135379242	-3.41659	0.000667364	0.075069	0.709651	0.478071	0.972615
cg06906472	ST6GAL2	84620	2	107502801	-3.41624	0.000668229	0.0751069	-1.7524	0.0799836	0.643523
cg05105745	ATP11A	23250	13	113440234	-3.41613	0.000668485	0.0750765	0.0118716	0.99053	0.999413
cg06572911	ACSF3	197322	16	89186314	-3.416	0.000668809	0.0750537	0.979884	0.327359	0.935027
cg05899103	LOC390595	0	15	65394570	-3.41521	0.00067072	0.0752088	NA	NA	NA
cg11332163		0	4	54975593	-3.41515	0.000670853	0.0751646	NA	NA	NA
cg01504489	GPER;C7orf50	2852	7	1131626	-3.41281	0.000676561	0.075685	-0.405706	0.685038	0.991544
cg10518155	UBE2J2	118424	1	1190541	-3.41271	0.000676813	0.0756538	-0.728381	0.466535	0.969205
cg16734191	ETS2	2114	21	40194848	-3.41202	0.000678481	0.0757807	0.0416102	0.966817	0.996793
cg11232254	PEPD	5184	19	33892576	-3.41161	0.000679511	0.0757769	-1.99473	0.0463187	0.51652
cg14604007	KCNT1	57582	9	138683902	-3.41133	0.000680186	0.0757928	2.49533	0.0127298	0.281125
cg16185213		0	4	137733633	-3.41126	0.00068037	0.0757541	NA	NA	NA
cg02013838		0	2	105460715	-3.41047	0.000682307	0.0759104	NA	NA	NA
cg11178293	FEZF2	55079	3	62355505	-3.40986	0.000683809	0.0760181	-0.863539	0.38803	0.953987
cg17176016		0	6	108441207	-3.40975	0.000684077	0.0759886	NA	NA	NA
cg00804210		0	9	99259315	-3.40946	0.000684795	0.076009	NA	NA	NA
cg05787556	TLX3	30012	5	170735186	-3.40905	0.000685818	0.0760041	0.896306	0.370285	0.95064
cg24043887	TMEM80;DEAF1	283232	11	695896	-3.40889	0.000686206	0.075988	0.464045	0.642708	0.988792
cg22027766	PSMA8	143471	18	23713928	-3.40885	0.000686308	0.0759402	0.963614	0.335451	0.940499
cg01924481	SBF1	6305	22	50898563	-3.40875	0.000686544	0.0759074	2.62065	0.00889727	0.223824
cg12192797		0	19	12228551	-3.40861	0.000686892	0.0758869	NA	NA	NA
cg18930910	RNF39	80352	6	30039151	-3.4085	0.000687164	0.0758581	-0.755302	0.45023	0.965132
cg17109441		0	1	41304435	-3.40817	0.000687998	0.0758913	NA	NA	NA
cg00479240	KIAA1462	57608	10	30347670	-3.40704	0.000690808	0.0760834	-1.45266	0.146602	0.77861
cg20739526	DPP6	1804	7	154585989	-3.40698	0.000690953	0.0760406	-0.853881	0.393357	0.954453
cg22221025		0	1	110186044	-3.40674	0.000691552	0.0759891	NA	NA	NA
cg27050153		0	14	102030110	-3.40666	0.000691761	0.0759534	NA	NA	NA
cg26509328		0	18	44787728	-3.40664	0.000691805	0.0758997	NA	NA	NA
cg14507658		0	21	46408142	-3.40663	0.000691824	0.0758434	NA	NA	NA
cg18100702	IRX1	79192	5	3600572	-3.40601	0.000693388	0.0759564	-4.42225	1.07367e-05	0.00131775
cg27419075	PDE2A	5138	11	72295168	-3.4054	0.000694909	0.0760645	0.17723	0.859361	0.992637
cg10693058	SPTBN4	57731	19	41025658	-3.40529	0.000695177	0.0760354	1.66704	0.0957905	0.683769
cg26456435		0	16	31053788	-3.40473	0.000696596	0.0761321	NA	NA	NA
cg00171214		0	12	131977469	-3.40458	0.000696954	0.0761128	NA	NA	NA
cg06610484	MCHR2	84539	6	100442105	-3.40419	0.000697947	0.0761629	2.01489	0.0441593	0.510428
cg03319497		0	5	145722730	-3.40411	0.000698135	0.076125	NA	NA	NA
cg19784903	TBKBP1	9755	17	45786737	-3.40396	0.000698524	0.0761092	-0.222907	0.823649	0.992663
cg12187687		0	7	27253834	-3.40392	0.000698623	0.0760618	NA	NA	NA
cg18225577	TRPM4	54795	19	49713901	-3.40326	0.000700298	0.0761859	-1.21559	0.224401	0.872401
cg01025774		0	5	42944457	-3.40294	0.000701105	0.0762155	NA	NA	NA
cg19846622	MSX1	4487	4	4859960	-3.40275	0.00070159	0.07621	-0.748043	0.454594	0.967625
cg12614105	NPY	4852	7	24324435	-3.40274	0.000701614	0.0761545	-0.826361	0.408778	0.956019
cg11328436	HOTAIR	100124700	12	54360511	-3.40235	0.000702594	0.0762028	0.980845	0.326885	0.935389
cg05667379	DPP10	57628	2	115920764	-3.40225	0.000702834	0.0761708	0.0762601	0.939226	0.992241
cg17632372		0	7	1280236	-3.40153	0.000704657	0.0763103	NA	NA	NA
cg19613432	EN1	2019	2	119606151	-3.39931	0.000710317	0.0768065	-1.54085	0.12364	0.740562
cg14696458		0	1	91185157	-3.39908	0.000710922	0.0768136	NA	NA	NA
cg26879813		0	5	180541897	-3.39893	0.000711295	0.0767956	NA	NA	NA
cg13896783	CCDC148;PKP4	130940	2	159313876	-3.3987	0.000711879	0.0768004	-1.11334	0.265806	0.904376
cg18663063	MARVELD2	153562	5	68710907	-3.39861	0.00071211	0.0767672	-0.728857	0.466244	0.969097
cg07382347	RNF39	80352	6	30039408	-3.39861	0.000712131	0.0767114	-0.755302	0.45023	0.965132
cg07790615	RYR2	6262	1	237205174	-3.39824	0.000713072	0.0767547	-0.0807303	0.935671	0.994086
cg25964040	ZNF717	100131827	3	75834703	-3.39793	0.000713862	0.0767817	0.789833	0.429796	0.963128
cg08832227	KCNA1	3736	12	5020693	-3.39739	0.000715269	0.076875	-3.12084	0.00185035	0.0793887
cg13899814	ACVRL1	94	12	52309178	-3.39701	0.000716232	0.0769204	-0.780095	0.435503	0.96397
cg01224715	PCDHGA4;PCDHGA11;PCDHGA9;PCDHGA1;PCDHGB1;PCDHGB6;PCDHGA12;PCDHGB3;PCDHGB7;PCDHGA6;PCDHGA8;PCDHGA10;PCDHGA5;PCDHGB4;PCDHGA3;PCDHGA2;PCDHGA7;PCDHGB2;PCDHGB5	56111	5	140811520	-3.39613	0.000718518	0.0771078	-0.904295	0.366037	0.948633
cg02352240		0	16	51188372	-3.39552	0.000720077	0.0772169	NA	NA	NA
cg17284804	TCTEX1D1	200132	1	67218135	-3.395	0.000721423	0.077303	-3.52591	0.000439406	0.0271293
cg25126698	PCDHGA4;PCDHGB3;PCDHGA1;PCDHGA5;PCDHGB1;PCDHGA3;PCDHGA2;PCDHGB2	56111	5	140751840	-3.39496	0.000721532	0.0772565	-0.904295	0.366037	0.948633
cg22242857	SALL3	27164	18	76751952	-3.39479	0.000721982	0.0772467	-0.769566	0.441723	0.965601
cg22321267		0	7	5647332	-3.39475	0.000722082	0.0771993	NA	NA	NA
cg00688681		0	X	53030043	-3.39409	0.000723812	0.0773263	NA	NA	NA
cg07552803	NEFM	4741	8	24771326	-3.39375	0.000724682	0.0773612	-2.25452	0.0243593	0.390269
cg06544405		0	18	70536807	-3.39325	0.000725983	0.077384	NA	NA	NA
cg07815799	ARHGEF4	50649	2	131674140	-3.39325	0.00072599	0.0773269	-1.50309	0.133102	0.756513
cg16783572	WDR20	91833	14	102680429	-3.39279	0.000727184	0.0773962	0.0577919	0.953925	0.995205
cg20746793	SHROOM2	357	X	9858615	-3.39189	0.000729545	0.0775895	-0.460229	0.645443	0.988196
cg23034496	PCGF3	10336	4	741516	-3.39187	0.000729615	0.077539	0.357312	0.720927	0.992218
cg24962011	DIP2C	22982	10	712165	-3.39151	0.00073054	0.0775794	0.126883	0.899056	0.989822
cg18947553		0	1	227747468	-3.39139	0.00073087	0.0775566	NA	NA	NA
cg04428799	ZFYVE20	64145	3	15116218	-3.39129	0.000731126	0.077526	-0.580274	0.561849	0.982556
cg05541329		0	15	22692708	-3.39	0.000734511	0.0777692	NA	NA	NA
cg14638044		0	4	1626643	-3.38957	0.000735654	0.0778323	NA	NA	NA
cg25854943	AATK	9625	17	79133209	-3.38887	0.000737517	0.0779715	-0.776768	0.437463	0.964094
cg10386298		0	1	221050491	-3.38651	0.000743802	0.0785776	NA	NA	NA
cg10222027	CSDAP1	440359	16	31580590	-3.38639	0.000744104	0.0785512	-0.31147	0.755502	0.99355
cg09030672	HSF4;FBXL8	3299	16	67197150	-3.385	0.000747826	0.0788857	1.4996	0.134004	0.757175
cg15374686	SLC6A17	388662	1	110694263	-3.38443	0.000749363	0.0789893	-2.09222	0.0366473	0.465586
cg17833265		0	17	48042135	-3.3838	0.000751048	0.0791084	NA	NA	NA
cg15895690		0	14	60982635	-3.38358	0.000751645	0.0791127	NA	NA	NA
cg08326019	LPPR2	64748	19	11472261	-3.38302	0.000753178	0.0792155	-0.853787	0.393409	0.954465
cg24000814		0	3	184301730	-3.38286	0.0007536	0.0792014	NA	NA	NA
cg10714510	HLA-DQB2	3120	6	32729465	-3.38206	0.000755769	0.0793708	0.27257	0.785235	0.993924
cg09093485	RNF39	80352	6	30038882	-3.38111	0.000758355	0.0795251	-0.755302	0.45023	0.965132
cg11763866		0	11	70310112	-3.37952	0.000762675	0.0799192	NA	NA	NA
cg05198960	ANKLE2	23141	12	133309102	-3.37864	0.00076508	0.0801123	-1.07125	0.284294	0.919099
cg05445348	ACSF3	197322	16	89219472	-3.37768	0.00076773	0.0803307	0.979884	0.327359	0.935027
cg10818901	PCGF3	10336	4	739607	-3.37753	0.000768148	0.0803155	0.357312	0.720927	0.992218
cg24601355		0	18	72799885	-3.37739	0.000768525	0.0802959	NA	NA	NA
cg18279326		0	10	102475324	-3.3772	0.000769035	0.0802903	NA	NA	NA
cg18950778	WT1	7490	11	32455362	-3.3768	0.000770152	0.080348	-0.74083	0.458954	0.96876
cg07306259		0	7	36007718	-3.37623	0.000771728	0.0804535	NA	NA	NA
cg21548955	PCDHGA4;PCDHGA6;PCDHGA9;PCDHGA1;PCDHGA8;PCDHGA5;PCDHGB1;PCDHGA10;PCDHGB4;PCDHGA3;PCDHGA2;PCDHGB6;PCDHGA7;PCDHGB2;PCDHGB5;PCDHGB3	56111	5	140794993	-3.37601	0.000772334	0.080399	-0.904295	0.366037	0.948633
cg00172603	SSBP3	23648	1	54822031	-3.37513	0.000774762	0.0805928	1.83526	0.0667371	0.609055
cg05297328	MIR410;MIR656	574434	14	101532225	-3.37488	0.000775449	0.0806054	NA	NA	NA
cg01503065	DCHS2	54798	4	155411806	-3.37488	0.000775472	0.080549	-1.80263	0.0717201	0.621749
cg17740959		0	17	46101256	-3.37428	0.000777117	0.080661	NA	NA	NA
cg01739381	OOEP	441161	6	74079669	-3.37421	0.00077733	0.0806244	1.84401	0.06545	0.604115
cg01558931		0	5	72676121	-3.37412	0.000777567	0.0805902	NA	NA	NA
cg06724305	DMRTA2	63950	1	50887944	-3.37334	0.000779741	0.0807568	-0.571815	0.567564	0.983043
cg04964031	PCDHGA4;PCDHGC3;PCDHGA12;PCDHGA11;PCDHGA9;PCDHGA1;PCDHGB1;PCDHGC5;PCDHGB6;PCDHGB3;PCDHGB7;PCDHGA6;PCDHGA8;PCDHGA10;PCDHGA5;PCDHGB4;PCDHGC4;PCDHGA3;PCDHGA2;PCDHGA7;PCDHGB2;PCDHGB5	56111	5	140871156	-3.373	0.000780708	0.0807982	-0.904295	0.366037	0.948633
cg01471196	ZNF334	55713	20	45142065	-3.3722	0.000782944	0.0809707	1.09947	0.271803	0.908898
cg18192155		0	21	44258298	-3.37199	0.000783515	0.080971	NA	NA	NA
cg02665399	PRKAR1B	5575	7	611060	-3.37104	0.000786194	0.0811301	0.392257	0.694944	0.992057
cg22987457		0	7	157211561	-3.37079	0.000786883	0.0811424	NA	NA	NA
cg09832244	LPAR5	57121	12	6729600	-3.37052	0.000787642	0.0811032	-1.42781	0.153631	0.788639
cg18956933		0	3	147136904	-3.36982	0.000789623	0.0812484	NA	NA	NA
cg11056569	GPRIN1	114787	5	176024650	-3.3698	0.000789688	0.0811965	-1.57995	0.114406	0.721083
cg09021817	RPA1	6117	17	1799727	-3.36967	0.000790062	0.0811763	-1.25221	0.210759	0.861544
cg24966762	C1orf106	55765	1	200880710	-3.36926	0.000791205	0.0811766	-0.146819	0.883302	0.990517
cg04991036	C14orf23	387978	14	29243762	-3.36893	0.000792152	0.0812153	0.188548	0.850482	0.992229
cg07303744	PCGF3	10336	4	738661	-3.36878	0.000792582	0.0812009	0.357312	0.720927	0.992218
cg06470822		0	6	28175283	-3.3683	0.000793924	0.0812799	NA	NA	NA
cg09709600	EHBP1L1	254102	11	65359521	-3.36749	0.000796223	0.0814567	1.88822	0.0592598	0.580585
cg27119904	RASA3	22821	13	114814333	-3.36687	0.000797994	0.0815793	0.397016	0.691432	0.992712
cg01171212	HOXD3	3232	2	177036436	-3.36661	0.000798731	0.081596	1.17555	0.240028	0.885231
cg00824018	INA	9118	10	105037661	-3.3654	0.000802204	0.0818334	-0.312533	0.754695	0.993327
cg12166610	NRG1	3084	8	31498256	-3.36518	0.000802837	0.0818394	-2.00782	0.0449066	0.513787
cg26056703		0	15	95870321	-3.36497	0.000803441	0.0817839	NA	NA	NA
cg06839483	KIAA1161	57462	9	34372236	-3.36466	0.00080431	0.0818138	-1.22755	0.219878	0.867473
cg17508591	PCDHA6;PCDHA2;PCDHA1;PCDHA7;PCDHA5;PCDHA3;PCDHA4	56142	5	140214138	-3.36383	0.000806698	0.0819397	-0.289377	0.772347	0.994393
cg07751641		0	5	134826244	-3.36314	0.000808709	0.0820854	NA	NA	NA
cg22885062	SF1	7536	11	64533556	-3.36228	0.000811184	0.082278	0.70533	0.480754	0.973283
cg09636459	OBSCN	84033	1	228467988	-3.36191	0.000812258	0.0823283	0.424448	0.671322	0.992187
cg03879918	EBF3	253738	10	131686425	-3.3613	0.000814021	0.0824483	0.0646314	0.948479	0.994236
cg02580763	PCDHGA4;PCDHGA2;PCDHGA5;PCDHGB2;PCDHGA1;PCDHGB1;PCDHGA3	56111	5	140745892	-3.36113	0.000814521	0.0824403	-0.904295	0.366037	0.948633
cg11899622	C13orf16	121793	13	111979022	-3.3592	0.000820149	0.082951	-0.892844	0.372136	0.950811
cg18698788		0	15	89952499	-3.35842	0.000822434	0.083123	NA	NA	NA
cg20996561	CACNA1I	8911	22	40082316	-3.35831	0.000822761	0.0830971	-0.429855	0.667385	0.991215
cg08269742	PIK3R5	23533	17	8868541	-3.35753	0.000825038	0.083268	0.724808	0.468724	0.969177
cg14525247	MIR219-2	407003	9	131154899	-3.35592	0.000829803	0.0836304	NA	NA	NA
cg18479798	SF1	7536	11	64533623	-3.35524	0.000831796	0.083772	0.70533	0.480754	0.973283
cg26444528	PCDH17	27253	13	58207859	-3.355	0.000832514	0.083785	-1.01453	0.310554	0.927174
cg02479299	TRIM50	135892	7	72726840	-3.35433	0.000834503	0.0839259	1.14304	0.253272	0.896524
cg19194373	EDN3	1908	20	57875703	-3.35425	0.000834748	0.0838913	-1.10039	0.271404	0.908765
cg04313756	TCL1A	8115	14	96180842	-3.35391	0.000835753	0.0838739	2.07315	0.0383905	0.476085
cg17909890	DMRTA1	63951	9	22447694	-3.35172	0.00084231	0.0844724	1.27639	0.202088	0.855096
cg26003993	MAD1L1	8379	7	1866358	-3.35133	0.000843457	0.0845279	0.968033	0.333241	0.939766
cg19414741	PENK	5179	8	57358240	-3.3512	0.000843843	0.0845071	-0.901003	0.367784	0.948909
cg17852221	PCDHA7;PCDHA13;PCDHA12;PCDHA6;PCDHA10;PCDHA4;PCDHA11;PCDHA8;PCDHA1;PCDHA2;PCDHA9;PCDHA5;PCDHA3	56141	5	140263655	-3.35111	0.000844121	0.0844756	1.06037	0.289209	0.920587
cg13350173		0	19	38281183	-3.35103	0.000844379	0.0844421	NA	NA	NA
cg21722795	PCDHGA1	56114	5	140712459	-3.35077	0.000845153	0.0844601	-0.176606	0.859851	0.992184
cg10552126	DPP6	1804	7	154002064	-3.35036	0.000846392	0.0845246	-0.853881	0.393357	0.954453
cg18321548	ALX4	60529	11	44332624	-3.34992	0.000847716	0.0845975	-0.327898	0.743051	0.993171
cg10161423	SLC29A4	222962	7	5323184	-3.34938	0.000849337	0.0847	-1.65924	0.0973534	0.686696
cg23980196	TTC7B	145567	14	91007859	-3.34908	0.000850261	0.0847328	0.666365	0.505317	0.976728
cg23937816		0	8	91997231	-3.34773	0.000854352	0.0850809	NA	NA	NA
cg13332143	ARID3A	1820	19	942270	-3.34735	0.000855488	0.0851345	-0.261124	0.794046	0.993219
cg17714025	KCNA4	3739	11	30038619	-3.34653	0.000857983	0.0853232	0.238125	0.811829	0.994696
cg24685006	TFAP2E	339488	1	36043014	-3.34642	0.000858314	0.0852965	-1.24088	0.214914	0.860462
cg17292758	PPFIA3	8541	19	49636594	-3.3463	0.000858682	0.0852142	-0.0115433	0.990792	0.999528
cg15579587	LRRFIP1	9208	2	238600061	-3.34563	0.000860735	0.0853584	-0.236422	0.813149	0.994509
cg04352272		0	17	3289798	-3.34498	0.000862737	0.0854974	NA	NA	NA
cg19159759	CRYL1	51084	13	20989818	-3.34473	0.000863501	0.0855136	1.79067	0.0736218	0.626172
cg23238134	ALPI	248	2	233323718	-3.34445	0.00086437	0.0855402	0.937692	0.348609	0.947226
cg23516949	SERINC4;C15orf63	619189	15	44092937	-3.34444	0.000864374	0.0854812	3.02805	0.0025187	0.0958763
cg02103924		0	1	110672857	-3.34297	0.00086892	0.0858711	NA	NA	NA
cg24691854		0	X	139593162	-3.3429	0.000869119	0.0858312	NA	NA	NA
cg20400592	DLEU7	220107	13	51418041	-3.34241	0.000870642	0.085922	2.47148	0.013606	0.290343
cg07016060	INPP5A	3632	10	134505029	-3.34198	0.000871963	0.0859928	-0.045383	0.96381	0.996942
cg21496658	MME	4311	3	154797677	-3.34188	0.000872283	0.0859648	-4.20183	2.86214e-05	0.00288364
cg09029624	PCDHGA4;PCDHGA1;PCDHGA6;PCDHGA5;PCDHGB1;PCDHGA3;PCDHGA2;PCDHGB2;PCDHGB3	56111	5	140755255	-3.34117	0.000874471	0.0861209	-0.904295	0.366037	0.948633
cg13223565	PCNT	5116	21	47831927	-3.3404	0.000876869	0.0862974	-0.571809	0.567568	0.982966
cg00232827	NEURL1B	54492	5	172096764	-3.33984	0.000878621	0.0863504	-0.0832362	0.933679	0.993585
cg04733537	TMEM132D	121256	12	130388748	-3.33948	0.000879759	0.0864026	-0.41889	0.675379	0.990663
cg23909013	KCNJ6	3763	21	39288941	-3.33929	0.000880333	0.0863994	-1.43141	0.152597	0.787926
cg27279301	CRIP2	1397	14	105945287	-3.33902	0.000881192	0.0864242	-0.260289	0.79469	0.993166
cg08450752		0	15	73611451	-3.33887	0.000881645	0.0864091	NA	NA	NA
cg00228017		0	18	53447841	-3.33882	0.000881805	0.0863653	NA	NA	NA
cg18206027	VWC2	375567	7	49813486	-3.33846	0.000882944	0.0863581	1.68204	0.0928442	0.674386
cg02053054	CMTM1	113540	16	66600283	-3.33816	0.000883878	0.0863901	0.0665561	0.946947	0.993968
cg27533201		0	21	37259319	-3.33802	0.000884303	0.0863724	NA	NA	NA
cg01561869	PCDHGA2;PCDHGA3;PCDHGA1	56113	5	140725147	-3.33801	0.00088433	0.0863158	0.107824	0.914155	0.99162
cg02009103	LZTS2	84445	10	102766386	-3.33786	0.00088481	0.0863035	0.196104	0.844565	0.99207
cg20248516	EN1	2019	2	119602901	-3.33778	0.000885052	0.086268	-1.54085	0.12364	0.740562
cg09480336	POLD1	5424	19	50910441	-3.33619	0.000890068	0.0866384	0.865592	0.386902	0.953415
cg08261094	SFRP4	6424	7	37956276	-3.33545	0.000892401	0.0868061	-1.3251	0.185413	0.833105
cg17876831	SLC5A10	125206	17	18918410	-3.33531	0.00089285	0.0867905	0.0494122	0.9606	0.996165
cg16478154		0	4	188534873	-3.33531	0.000892859	0.0867322	NA	NA	NA
cg04425783	MTA1	9112	14	105915671	-3.33502	0.000893767	0.0867612	1.44943	0.147502	0.779914
cg13300273	GPR25	2848	1	200842890	-3.335	0.000893836	0.0867088	0.946986	0.343854	0.94406
cg05927579	KCNK15	60598	20	43378669	-3.33471	0.000894741	0.0867375	-0.602266	0.547121	0.981899
cg03630413		0	15	96866537	-3.33416	0.000896503	0.0868492	NA	NA	NA
cg19240483	TBL2	26608	7	72985061	-3.33357	0.000898366	0.0869705	-0.295729	0.767493	0.994401
cg05804948		0	19	30717217	-3.3331	0.000899866	0.0870565	NA	NA	NA
cg14530382	SH2D3A	10045	19	6753525	-3.33307	0.000899966	0.0870071	-2.41931	0.0157114	0.313779
cg01607625	PPP1R2P1	100507444	6	32847830	-3.33203	0.000903274	0.0872677	NA	NA	NA
cg04721268	RHBDF1	64285	16	112802	-3.33199	0.00090341	0.0872216	1.05452	0.291878	0.920975
cg05834845	MUC4	4585	3	195489306	-3.33178	0.000904104	0.0872295	-1.09949	0.271793	0.909013
cg10052908	DPPA5	340168	6	74063522	-3.33134	0.000905485	0.0873036	0.404734	0.685752	0.991728
cg05688651		0	18	75612141	-3.33114	0.000906142	0.0873078	NA	NA	NA
cg26699102	CHRNA3	1136	15	78894483	-3.33026	0.000908985	0.0875225	-1.03229	0.302165	0.926021
cg14338345	DMRTA1	63951	9	22447679	-3.33017	0.00090927	0.0874908	1.27639	0.202088	0.855096
cg20539961	NCK2	8440	2	106497812	-3.32937	0.000911836	0.0876785	-1.27382	0.202995	0.855894
cg09072859	OPCML	4978	11	132934128	-3.32913	0.000912628	0.0876954	0.457296	0.647549	0.988132
cg12808347		0	2	11622001	-3.32852	0.00091459	0.0878247	NA	NA	NA
cg07445246	TCL1A	8115	14	96180653	-3.3285	0.000914634	0.0877697	2.07315	0.0383905	0.476085
cg25000576		0	6	13769806	-3.32814	0.000915819	0.0878243	NA	NA	NA
cg16448399	DLGAP1	9229	18	3880076	-3.3277	0.000917249	0.0879022	-1.6709	0.0950255	0.682155
cg09367696	OBSL1	23363	2	220420805	-3.32721	0.000918844	0.0879958	1.84896	0.0647319	0.601324
cg08219700		0	8	58056026	-3.32668	0.00092057	0.0881019	NA	NA	NA
cg05890620	ICAM4	3386	19	10397612	-3.32661	0.000920801	0.0880648	1.34593	0.178604	0.82691
cg06215569	ALX3	257	1	110611465	-3.32534	0.000924928	0.0883409	0.789001	0.430281	0.963045
cg03638905		0	5	72595625	-3.32391	0.000929626	0.0886113	NA	NA	NA
cg09951201	SLC12A7	10723	5	1100096	-3.32349	0.000931012	0.088684	0.911306	0.362334	0.947524
cg14364474	GNAL	2774	18	11821957	-3.32253	0.000934161	0.0889245	-0.958137	0.338204	0.942088
cg24643282	FMN2	56776	1	240256019	-3.32248	0.000934321	0.0888803	0.583217	0.559867	0.982654
cg11990308	ATP11A	23250	13	113441056	-3.3216	0.000937225	0.0890971	0.0118716	0.99053	0.999413
cg02889982	MPRIP	23164	17	16946247	-3.32118	0.00093862	0.0891702	0.0449438	0.96416	0.996693
cg13775533	PCDH19	57526	X	99663073	-3.31888	0.000946272	0.0898372	-2.20102	0.0279416	0.414235
cg10324643	GML	2765	8	143916377	-3.31871	0.000946864	0.0898335	0.473782	0.63575	0.989666
cg14500050	RASA3	22821	13	114852691	-3.31856	0.000947353	0.08982	0.397016	0.691432	0.992712
cg23244790	PCDHGA4;PCDHGA11;PCDHGA9;PCDHGA1;PCDHGB1;PCDHGB6;PCDHGA12;PCDHGB3;PCDHGB7;PCDHGA6;PCDHGA8;PCDHGA10;PCDHGA5;PCDHGB4;PCDHGA3;PCDHGA2;PCDHGA7;PCDHGB2;PCDHGB5	56111	5	140811102	-3.31837	0.000947987	0.0898203	-0.904295	0.366037	0.948633
cg07448060	MAGI2	9863	7	79083753	-3.3153	0.000958323	0.0907393	-0.554065	0.579647	0.985512
cg16369288	ZNF167	55888	3	44620726	-3.31355	0.000964257	0.0912405	-1.06295	0.288037	0.921054
cg01837364	HIST1H4G	8369	6	26246843	-3.31329	0.00096514	0.0912634	-0.461801	0.644315	0.988562
cg16001495	SIM2	6493	21	38080526	-3.31321	0.000965385	0.091226	-1.33619	0.181764	0.831092
cg03740167		0	10	23463746	-3.31316	0.000965572	0.0911832	NA	NA	NA
cg06158434	LEFTY2	7044	1	226127113	-3.31309	0.000965809	0.0911451	-1.49513	0.135168	0.759516
cg20959866	AJAP1	55966	1	4714008	-3.31301	0.000966065	0.0911089	-1.50584	0.132395	0.754825
cg18753646		0	4	187219538	-3.31248	0.000967868	0.0912185	NA	NA	NA
cg21821214		0	2	176969223	-3.31144	0.000971436	0.0914942	NA	NA	NA
cg08662665	ZNF536	9745	19	30865823	-3.31144	0.000971442	0.0914343	0.297397	0.76622	0.99447
cg22747746	NKX2-6	137814	8	23564193	-3.31038	0.000975083	0.0917164	2.86913	0.00419476	0.134625
cg23291280		0	19	31847970	-3.31036	0.000975151	0.0916623	NA	NA	NA
cg07899681		0	19	22444714	-3.31016	0.000975833	0.0916659	NA	NA	NA
cg06756211	CAPN2	824	1	223936799	-3.30991	0.000976675	0.0916845	0.826419	0.408745	0.956163
cg19509311		0	6	106429191	-3.30956	0.000977888	0.0916775	NA	NA	NA
cg04221877	RUNX3	864	1	25257515	-3.30882	0.000980456	0.0918578	0.260705	0.794369	0.993194
cg23952643	EIF3F	8665	11	8009057	-3.30841	0.000981853	0.0919282	1.57147	0.116361	0.723941
cg05502103	PRKAR1B	5575	7	588936	-3.30823	0.000982497	0.091928	0.392257	0.694944	0.992057
cg16890796	SLC17A7	57030	19	49937087	-3.30698	0.000986812	0.0922106	-0.0440774	0.964851	0.996643
cg08226379		0	4	111560807	-3.30691	0.000987043	0.0921717	NA	NA	NA
cg23348270		0	2	176969612	-3.3067	0.000987776	0.0921797	NA	NA	NA
cg05603527	VAX2	25806	2	71131629	-3.30575	0.000991085	0.0924279	0.0088896	0.992909	0.999473
cg23765754		0	19	30717766	-3.30526	0.000992801	0.0925274	NA	NA	NA
cg17942750	EHMT1	79813	9	140683527	-3.30487	0.000994152	0.0925322	0.215413	0.829485	0.992139
cg13282837	TCL1A	8115	14	96180648	-3.30341	0.000999275	0.0929482	2.07315	0.0383905	0.476085
cg20152309		0	10	36054255	-3.30311	0.00100033	0.0929852	NA	NA	NA
cg13038847		0	22	28073997	-3.30269	0.00100183	0.0930648	NA	NA	NA
cg01429449		0	2	176936397	-3.30264	0.00100201	0.0930204	NA	NA	NA
cg24010988	OOEP	441161	6	74079677	-3.3022	0.00100356	0.0930432	1.84401	0.06545	0.604115
cg02155658	PAX1	5075	20	21690036	-3.30178	0.00100504	0.0931191	-2.41772	0.0157797	0.313904
cg05311410	HOXA11AS;HOXA11	221883	7	27225523	-3.30125	0.00100691	0.0932321	-0.919383	0.358097	0.946837
cg11292440	SFMBT2	57713	10	7409618	-3.30113	0.00100732	0.0932091	0.700511	0.483757	0.973232
cg00848945	CACNA1C	775	12	2800919	-3.2998	0.00101206	0.0935869	-1.43058	0.152833	0.788141
cg03909844	TOP3B	8940	22	22311698	-3.29944	0.00101334	0.0936451	-0.0925631	0.926268	0.992899
cg18632712	GATA6	2627	18	19748135	-3.29772	0.00101947	0.0941506	1.47074	0.141648	0.768627
cg15894808		0	11	644116	-3.29699	0.00102209	0.0943314	NA	NA	NA
cg04951371	TSSC1	7260	2	3317860	-3.29691	0.00102239	0.0942972	-0.749945	0.453448	0.966608
cg24833819		0	5	42924552	-3.29629	0.0010246	0.0944398	NA	NA	NA
cg19247475	PCDHGA4;PCDHGA9;PCDHGA1;PCDHGB1;PCDHGB6;PCDHGB3;PCDHGA6;PCDHGA8;PCDHGA5;PCDHGB4;PCDHGA3;PCDHGA2;PCDHGB2;PCDHGA7;PCDHGB5	56111	5	140789745	-3.29545	0.00102761	0.0946566	-0.904295	0.366037	0.948633
cg17939805		0	18	44773988	-3.29468	0.00103038	0.0948507	NA	NA	NA
cg10703826	TBX15	6913	1	119532116	-3.29379	0.00103364	0.0950889	-2.22784	0.0260929	0.400916
cg26981809	TBKBP1	9755	17	45786512	-3.2937	0.00103396	0.0950568	-0.222907	0.823649	0.992663
cg07827943	KCNJ6	3763	21	39289128	-3.29346	0.00103484	0.0950761	-1.43141	0.152597	0.787926
cg20810903		0	1	63787094	-3.2931	0.00103611	0.0951322	NA	NA	NA
cg25837803	PTGS2	5743	1	186649909	-3.2929	0.00103686	0.0951389	1.10243	0.270517	0.908347
cg10045137	POMC	5443	2	25383940	-3.29213	0.00103966	0.0953349	-0.0611268	0.951269	0.994382
cg25294910		0	6	168136054	-3.29193	0.00104037	0.0953386	NA	NA	NA
cg22727965		0	7	25898770	-3.29155	0.00104177	0.0954053	NA	NA	NA
cg08408433	PTGIR	5739	19	47127358	-3.29072	0.00104482	0.0956229	0.00233358	0.998138	1.00006
cg07580895		0	4	1043494	-3.28972	0.00104849	0.0958973	NA	NA	NA
cg22275864	ADRB3	155	8	37822562	-3.28951	0.00104926	0.0959062	1.02089	0.30753	0.926755
cg10935615		0	12	7858668	-3.28922	0.00105031	0.0959408	NA	NA	NA
cg20071427	ZNF331	55422	19	54058085	-3.28921	0.00105036	0.0958836	1.54033	0.123768	0.740451
cg18121003	CCDC81	60494	11	86085757	-3.28912	0.00105069	0.0957911	0.237811	0.812072	0.994573
cg16620392		0	10	131765379	-3.28818	0.00105413	0.0960433	NA	NA	NA
cg02425518	SLC22A1	6580	6	160555086	-3.2879	0.0010552	0.0960791	1.89956	0.0577526	0.575282
cg17520027	NR5A2	2494	1	200010708	-3.28708	0.00105822	0.0962312	1.46809	0.142365	0.769221
cg27124370	WDR88	126248	19	33622961	-3.28659	0.00106002	0.0963337	1.74454	0.0813437	0.650076
cg01670306		0	8	38508658	-3.28584	0.0010628	0.0965248	NA	NA	NA
cg08515989	ASPHD1	253982	16	29912904	-3.2855	0.00106408	0.0965786	0.439749	0.660205	0.991091
cg09875150	FZD9	8326	7	72849964	-3.2852	0.0010652	0.0965575	-1.30537	0.192041	0.84251
cg09879526	SDCCAG8;AKT3	10806	1	243652762	-3.28409	0.00106935	0.0968718	0.375555	0.70732	0.992169
cg17877704		0	12	127940483	-3.28351	0.00107152	0.0970069	NA	NA	NA
cg24491784		0	15	96887824	-3.28277	0.00107429	0.0971962	NA	NA	NA
cg00997400	CDH4	1002	20	60502131	-3.28205	0.001077	0.0973793	-0.557847	0.577063	0.985171
cg05539217	EMX2OS;EMX2	196047	10	119304379	-3.28184	0.00107782	0.0973913	-0.138439	0.889919	0.991022
cg16110411	TERT	7015	5	1286162	-3.28162	0.00107862	0.0974019	-0.388393	0.697801	0.991939
cg09591072		0	3	184301468	-3.28115	0.00108039	0.0974999	NA	NA	NA
cg00236302	RAP1B	5908	12	69004867	-3.28108	0.00108067	0.0974637	-1.40536	0.160196	0.800625
cg04824401	C1QTNF4	114900	11	47612380	-3.28096	0.00108114	0.0974442	-0.932625	0.351218	0.947705
cg16308533	CNTNAP1	8506	17	40838983	-3.28069	0.00108215	0.0974733	0.332819	0.739335	0.99279
cg06760710	HOXB8	3218	17	46692008	-3.28019	0.00108405	0.0975826	-2.17427	0.0298971	0.425472
cg14062238	MUM1	84939	19	1371189	-3.27903	0.00108842	0.0978527	-0.1946	0.845742	0.992301
cg04400072		0	11	89785647	-3.27841	0.0010908	0.0980044	NA	NA	NA
cg20699586		0	1	227748719	-3.27839	0.00109086	0.0979482	NA	NA	NA
cg03726556		0	2	119607379	-3.27793	0.00109264	0.0980464	NA	NA	NA
cg17070108	AICDA	57379	12	8758006	-3.27728	0.00109511	0.0982058	2.13905	0.0326509	0.444364
cg17283453	ZNF177	7730	19	9473880	-3.27614	0.00109947	0.0985355	-1.64251	0.100771	0.695063
cg02900766	ALDH1A2	8854	15	58357319	-3.27602	0.00109995	0.0985164	-0.542251	0.587755	0.987442
cg13324546	NKX2-6	137814	8	23564031	-3.2754	0.00110231	0.0986656	2.86913	0.00419476	0.134625
cg17523544	FLJ39653	0	4	16258226	-3.27436	0.00110632	0.0989618	NA	NA	NA
cg11395949		0	6	13770187	-3.27104	0.00111922	0.0999908	NA	NA	NA
cg00924143		0	12	114881676	-3.27088	0.00111984	0.0999829	NA	NA	NA
cg24200107		0	4	189204296	-3.27087	0.00111988	0.0999244	NA	NA	NA
cg19182557		0	2	130345355	-3.27057	0.00112105	0.0999662	NA	NA	NA
cg02680710		0	6	169310568	-3.27039	0.00112177	0.0999673	NA	NA	NA
cg00769251	CDH11	1009	16	64984838	-3.27035	0.00112193	0.0999189	-1.83433	0.0668755	0.60922
cg16853119	C7orf26	79034	7	6647955	-3.27028	0.00112218	0.0998788	0.70995	0.477886	0.972434
cg04386400		0	6	31651158	-3.27028	0.00112221	0.0998191	NA	NA	NA
cg00629427		0	13	95357638	-3.27007	0.00112303	0.0998301	NA	NA	NA
cg23361092		0	13	79170923	-3.2697	0.00112448	0.0998961	NA	NA	NA
cg09147131	SLC16A3	9123	17	80189225	3.2715	0.00111743	0.0998929	0.183125	0.854734	0.992615
cg02390115	NBPF3	84224	1	21767211	3.2795	0.00108665	0.0977551	0.68881	0.491088	0.972048
cg15988970	DNAJC15	29103	13	43597736	3.28541	0.00106444	0.0965499	-0.732598	0.46396	0.968225
cg01796075	PEAR1	375033	1	156878573	3.28718	0.00105784	0.0962577	2.172	0.0300685	0.426412
cg13958749	MRPS11;MRPL46	64963	15	89010551	3.28913	0.00105065	0.0958484	-0.656296	0.511771	0.978278
cg12051532	ZNF761;LOC147804	388561	19	53935276	3.30231	0.00100315	0.0930652	-0.126019	0.89974	0.989983
cg26346718		0	17	79482045	3.30495	0.000993901	0.0925693	NA	NA	NA
cg09280462	AGAP8;PARG	119016	10	51225001	3.30765	0.000984485	0.0920535	0.451318	0.651849	0.98955
cg26479374	CTBP1;C4orf42	1487	4	1243980	3.30978	0.000977133	0.091667	0.482074	0.62985	0.987771
cg18506674	AP1S2	8905	X	15873330	3.32436	0.000928154	0.0885302	-0.693366	0.488226	0.97218
cg12744031		0	7	158751184	3.32502	0.000925966	0.0883807	NA	NA	NA
cg16147221	SLC2A9	56606	4	10020634	3.32623	0.00092203	0.0881232	-1.48826	0.136969	0.762231
cg07017477	THEM4	117145	1	151882157	3.33622	0.000889968	0.0866879	-1.69224	0.0908839	0.669269
cg05208581	WDFY2	115825	13	52158459	3.33852	0.000882743	0.0863978	2.06411	0.0392418	0.48192
cg16371752	ENSA	2029	1	150601789	3.34031	0.000877165	0.0862669	0.308745	0.757574	0.993372
cg08868601	MORN1	79906	1	2258153	3.34641	0.000858369	0.0852425	0.508599	0.611135	0.987638
cg16384355		0	7	157320516	3.35394	0.000835668	0.0839245	NA	NA	NA
cg23876603	SYAP1	94056	X	16737960	3.35689	0.000826931	0.0834	0.185148	0.853147	0.992593
cg07836661	SLMO1	10650	18	12407797	3.36417	0.000805727	0.0818995	-0.930054	0.352547	0.946623
cg07813608		0	19	53400933	3.36498	0.000803403	0.0818385	NA	NA	NA
cg09188300	EIF4EBP1	1978	8	37887903	3.36576	0.000801177	0.0817872	-0.527888	0.597683	0.98733
cg00400827		0	16	29230046	3.36929	0.000791129	0.0812273	NA	NA	NA
cg24028120	C19orf40;CCDC123	91442	19	33463094	3.37065	0.000787273	0.0811239	-0.164371	0.869469	0.991978
cg22027947	RPS26	6231	12	56435667	3.37169	0.000784362	0.0809997	0.744996	0.456433	0.968689
cg06377221	ARRDC2	27106	19	18111739	3.37608	0.000772135	0.080437	0.253764	0.799725	0.993086
cg00559967	ANKRD11	29123	16	89557017	3.38138	0.000757622	0.0795068	1.02987	0.303295	0.9264
cg19767215	SPINT2	10653	19	38755103	3.39088	0.000732209	0.0775831	-0.45115	0.65197	0.989511
cg15701440	WDR47	22911	1	109584746	3.39338	0.000725642	0.0774056	-0.152303	0.878976	0.990492
cg22399111		0	8	142295325	3.40049	0.000707318	0.0765403	NA	NA	NA
cg24540521	THEM4	117145	1	151882287	3.40695	0.000691034	0.0759908	-1.69224	0.0908839	0.669269
cg22488268	MICALL2	79778	7	1498641	3.40769	0.000689177	0.0759626	1.92226	0.0548311	0.563362
cg13118906	CYB561	1534	17	61524292	3.40915	0.000685559	0.0760346	-1.84571	0.0652033	0.602387
cg13223858	TBC1D22A	25771	22	47370226	3.41173	0.000679207	0.0758024	1.1316	0.258048	0.899129
cg02906397	SDHAP2	727956	3	195384742	3.41439	0.000672715	0.0753139	0.00464518	0.996295	0.999899
cg10145449	SPATC1	375686	8	145101671	3.43049	0.000634601	0.0725294	0.964878	0.334818	0.939894
cg08389347		0	10	47729791	3.43448	0.000625454	0.0718299	NA	NA	NA
cg11829380	RPAIN;NUP88	84268	17	5323521	3.43993	0.000613189	0.0711095	-0.766316	0.443652	0.964613
cg01457183	DNAJC19	131118	3	180707371	3.44224	0.000608065	0.0709195	-0.486576	0.626656	0.987734
cg13880094	GRAMD1A	57655	19	35491738	3.44238	0.000607746	0.0709404	0.729715	0.46572	0.969201
cg00331433	SYAP1	94056	X	16737800	3.44308	0.000606192	0.0708752	0.185148	0.853147	0.992593
cg07759570	GRAMD1A	57655	19	35491951	3.44784	0.000595775	0.0701178	0.729715	0.46572	0.969201
cg05441039	CHMP1A;C16orf55	5119	16	89723364	3.45958	0.000570779	0.068305	0.159423	0.873365	0.991897
cg12700755	MORN1	79906	1	2258373	3.46644	0.000556638	0.0671772	0.508599	0.611135	0.987638
cg10381409	MORC3	23515	21	37692231	3.46697	0.000555558	0.0671038	0.479402	0.631748	0.988299
cg01215761		0	X	129254804	3.47076	0.000547898	0.0666876	NA	NA	NA
cg02702614	BDH1	622	3	197282691	3.47471	0.000540014	0.0662375	-0.692092	0.489025	0.972528
cg17826530		0	1	59280290	3.48611	0.000517865	0.0648046	NA	NA	NA
cg08396481	CNOT4	4850	7	135194601	3.48631	0.000517479	0.0648132	0.102404	0.918454	0.991821
cg04420309	RHOD	29984	11	66824445	3.50791	0.000477843	0.0618058	1.47485	0.140538	0.766301
cg15375239	SPINT2	10653	19	38755287	3.50963	0.000474801	0.0618053	-0.45115	0.65197	0.989511
cg15693066	RHOD	29984	11	66824189	3.51493	0.00046558	0.0610514	1.47485	0.140538	0.766301
cg10822149	PDE4DIP	9659	1	145039893	3.5152	0.000465113	0.0610464	-0.0114416	0.990873	0.999461
cg00396059	FAM49B	51571	8	130952075	3.52722	0.000444817	0.0592564	-0.320861	0.748376	0.993665
cg11688275	MYC	4609	8	128750871	3.53292	0.000435491	0.0584514	-0.371996	0.709968	0.991214
cg02711801	ZNF793	390927	19	37997798	3.5422	0.000420688	0.0575494	-1.24446	0.213596	0.860288
cg03101580	TOLLIP	54472	11	1302893	3.57418	0.000373219	0.0540682	0.730285	0.465371	0.969372
cg03609269	SCP2	6342	1	53393023	3.58186	0.000362585	0.0529043	0.510067	0.610107	0.987789
cg10023101	KBTBD6	89890	13	41706958	3.58295	0.000361097	0.0528497	-0.264963	0.791087	0.993446
cg09787394	LIPT1;TSGA10	51601	2	99771194	3.60561	0.000331487	0.0497954	0.0696303	0.944501	0.994131
cg14288281		0	1	1093457	3.62643	0.000306297	0.0473603	NA	NA	NA
cg03147210	THEM4	117145	1	151882284	3.6529	0.000276859	0.0443494	-1.69224	0.0908839	0.669269
cg19356629		0	10	131577741	3.66863	0.000260645	0.0427623	NA	NA	NA
cg04125223	CCDC127;SDHA	133957	5	218200	3.66918	0.000260092	0.0427208	-0.470019	0.638434	0.989434
cg09324663	MDFI	4188	6	41621232	3.67482	0.000254513	0.0420469	-0.0224991	0.982054	0.999777
cg21194454	F7	2155	13	113761992	3.67589	0.000253466	0.0420202	0.489443	0.624626	0.987455
cg13755546	MTHFD2	10797	2	74425580	3.6797	0.000249773	0.0417481	0.312624	0.754626	0.993429
cg26386472		0	12	122277360	3.72211	0.000211951	0.0373094	NA	NA	NA
cg24588375	ZNF793	390927	19	37997791	3.7253	0.000209335	0.0369402	-1.24446	0.213596	0.860288
cg14688108	SBF2	81846	11	10315924	3.7268	0.000208114	0.0367703	-0.518442	0.604254	0.986994
cg25962774	F12	2161	5	176831364	3.72823	0.00020696	0.0366119	0.417737	0.676221	0.990464
cg02379052	CDCA4	55038	14	105486781	3.73124	0.000204543	0.036365	-1.42466	0.154539	0.789696
cg20571333	EDEM1	9695	3	5229215	3.73381	0.000202506	0.0361382	-0.0124964	0.990032	0.999658
cg25034557	PACS1	55690	11	65838645	3.73892	0.000198505	0.0355579	2.63127	0.00862568	0.219721
cg22917082	CXorf15	55787	X	16804636	3.74629	0.000192871	0.0349888	0.758697	0.448196	0.964859
cg03940966	THEM4	117145	1	151881785	3.75484	0.000186522	0.0342736	-1.69224	0.0908839	0.669269
cg15355420	CDS1	1040	4	85504039	3.76436	0.000179678	0.0334476	-0.887975	0.374748	0.951961
cg00108164	ACP1;SH3YL1	52	2	264199	3.77064	0.0001753	0.0328473	-0.844464	0.398594	0.956843
cg20667230	ZNF8	7554	19	58790150	3.77993	0.000169001	0.0320892	-0.568533	0.569789	0.983364
cg03750315	EIF1AY	9086	Y	22737896	3.79331	0.000160299	0.0309318	-0.418671	0.675539	0.990396
cg24888989	KIF15;KIAA1143	56992	3	44803291	3.81393	0.00014772	0.029587	-0.450571	0.652387	0.989403
cg03792768	BDH1	622	3	197281934	3.81457	0.000147347	0.0295539	-0.692092	0.489025	0.972528
cg21606777	VGF	7425	7	100806772	3.81912	0.000144704	0.0292296	-0.407304	0.683864	0.99183
cg21815479	EIF4EBP1	1978	8	37887900	3.82094	0.000143661	0.0291845	-0.527888	0.597683	0.98733
cg02227867	C8orf58	541565	8	22457446	3.82313	0.000142415	0.0290557	-1.07581	0.282246	0.916723
cg13719746	ANP32B	10541	9	100747559	3.84825	0.000128826	0.0271386	-0.529129	0.596823	0.987359
cg11001216	A1BG	1	19	58859029	3.85266	0.000126569	0.0268619	0.809795	0.418233	0.960277
cg23478354	SLC27A5	10998	19	59010761	3.85467	0.000125552	0.0267657	-0.219135	0.826586	0.992187
cg21082272	LOC100130872;LOC100130872-SPON2	100130872	4	1202966	3.86201	0.000121906	0.0262636	0.176381	0.860027	0.992105
cg19660239		0	19	53400545	3.87329	0.000116501	0.0256423	NA	NA	NA
cg00702638	KIF15;KIAA1143	56992	3	44803293	3.87809	0.000114271	0.0253869	-0.450571	0.652387	0.989403
cg19516235	TXNRD1	7296	12	104682931	3.88211	0.000112435	0.0251754	0.316996	0.751307	0.993712
cg13030674	PRSS23	11098	11	86511386	3.9031	0.000103286	0.0239555	0.16626	0.867983	0.991903
cg17502394	TTBK1	84630	6	43251710	3.90944	0.000100666	0.0235395	1.20019	0.230322	0.876576
cg19806106	ZNF239	8187	10	44069975	3.91018	0.000100361	0.0235068	-0.727479	0.467087	0.969059
cg10351808	FXYD1	5348	19	35632493	3.92805	9.33e-05	0.0225642	1.68035	0.0931737	0.675084
cg11706775	ZFYVE9	9372	1	52608467	3.9325	9.16e-05	0.0221962	-1.76718	0.0774749	0.637005
cg19648388	CCDC43	124808	17	42767153	3.9358	9.04e-05	0.0220873	-1.02655	0.30486	0.925871
cg09201001	SPTY2D1	144108	11	18656081	3.94014	8.88e-05	0.0218114	-0.301688	0.762947	0.994173
cg14707392	MED19;TMX2	219541	11	57479818	3.95453	8.38e-05	0.0209247	-1.97875	0.0480934	0.529891
cg10155817	LOC220729	220729	3	197354956	3.95466	8.37e-05	0.020951	0.376183	0.706853	0.992407
cg05020252	EFHD1	80303	2	233499283	4.00127	6.91e-05	0.0182868	-2.42254	0.0155732	0.31256
cg25274052	PARP6	56965	15	72565016	4.04226	5.83e-05	0.0165266	-0.0919254	0.926774	0.992706
cg23009818	DNMT3A	1788	2	25499764	4.04414	5.78e-05	0.0164631	0.613496	0.539675	0.980616
cg23625312	SERGEF	26297	11	18034626	4.07616	5.05e-05	0.0152164	-0.319762	0.74921	0.993663
cg23693289	PTK2B	2185	8	27183097	4.0855	4.86e-05	0.0147858	1.86041	0.063095	0.596515
cg19518132	ZNF8	7554	19	58790160	4.0944	4.68e-05	0.0144889	-0.568533	0.569789	0.983364
cg14575559	ARRDC2	27106	19	18111766	4.09501	4.67e-05	0.0145147	0.253764	0.799725	0.993086
cg26115449	DNAJC19	131118	3	180707572	4.10064	4.56e-05	0.0142667	-0.486576	0.626656	0.987734
cg11817309	ZNF692	55657	1	249152443	4.10262	4.52e-05	0.0142413	0.684081	0.494068	0.973286
cg00655071	ZNF280D	54816	15	57025816	4.10371	4.5e-05	0.0142075	0.579929	0.562081	0.982199
cg04552531	PDGFB	5155	22	39638361	4.11017	4.38e-05	0.0139166	-0.293684	0.769055	0.994898
cg22728323	EIF4EBP1	1978	8	37887713	4.11386	4.31e-05	0.0137928	-0.527888	0.597683	0.98733
cg25204094	ANP32B	10541	9	100747473	4.12951	4.03e-05	0.0135132	-0.529129	0.596823	0.987359
cg15862406	SLC16A3	9123	17	80188816	4.14085	3.84e-05	0.0130295	0.183125	0.854734	0.992615
cg20593826		0	1	59280370	4.23223	2.59e-05	0.00992581	NA	NA	NA
cg10442572	MGRN1	23295	16	4675384	4.24789	2.42e-05	0.00942365	0.910504	0.362756	0.947771
cg12835924	ZNF239	8187	10	44070043	4.25004	2.4e-05	0.00938705	-0.727479	0.467087	0.969059
cg10734734	A1BG	1	19	58859021	4.25409	2.36e-05	0.00929937	0.809795	0.418233	0.960277
cg18090384	PIM3	415116	22	50355424	4.32934	1.69e-05	0.0075582	0.248419	0.803856	0.994131
cg20640573	ZNF101	94039	19	19779880	4.34148	1.6e-05	0.00725277	1.46144	0.14418	0.773047
cg04987499	CYB561	1534	17	61524073	4.37438	1.39e-05	0.00651138	-1.84571	0.0652033	0.602387
cg04980793	SRP54	6729	14	35451984	4.40771	1.19e-05	0.00589906	-0.399794	0.689386	0.992518
cg16978910		0	10	131577703	4.41248	1.17e-05	0.00585493	NA	NA	NA
cg23163837		0	1	208042123	4.42025	1.13e-05	0.00583833	NA	NA	NA
cg24769403		0	5	159414366	4.45486	9.64e-06	0.00532042	NA	NA	NA
cg13775299		0	9	131937583	4.4767	8.73e-06	0.00495116	NA	NA	NA
cg00524108	PRR19;PAFAH1B3	284338	19	42806203	4.48505	8.4e-06	0.00486269	0.367639	0.713213	0.991166
cg07029277	TSC22D1	8848	13	45150537	4.49428	8.05e-06	0.0047389	0.670169	0.502891	0.975109
cg23411981	CRIP2	1397	14	105940377	4.52887	6.87e-06	0.00419873	-0.260289	0.79469	0.993166
cg09363194	BDH1	622	3	197282902	4.55942	5.97e-06	0.00386128	-0.692092	0.489025	0.972528
cg21412748	FCHSD2	9873	11	72852496	4.58621	5.27e-06	0.00355465	0.697114	0.485879	0.97344
cg21080506	ZNF721;ABCA11P	170960	4	467474	4.6077	4.76e-06	0.00329336	-0.256008	0.797992	0.992882
cg01819863	EPC1	80314	10	32635814	4.65277	3.85e-06	0.00284438	0.734653	0.462708	0.968606
cg16549711		0	1	208041887	4.68036	3.38e-06	0.00264714	NA	NA	NA
cg27664881	SQSTM1;MGAT4B	8878	5	179234149	4.7417	2.52e-06	0.00219252	0.00229599	0.998168	1.00005
cg12137206	GPAM	57678	10	113943397	4.74359	2.5e-06	0.00218615	-0.036773	0.970673	0.997619
cg17101553	ZNF8	7554	19	58790125	4.81956	1.73e-06	0.00160302	-0.568533	0.569789	0.983364
cg03785065	DNAJC19	131118	3	180707451	4.82387	1.7e-06	0.00157996	-0.486576	0.626656	0.987734
cg13395410	THEM4	117145	1	151881974	4.82711	1.67e-06	0.00156544	-1.69224	0.0908839	0.669269
cg23740135	MDFI	4188	6	41621208	4.84488	1.53e-06	0.00146434	-0.0224991	0.982054	0.999777
cg03979284	LOC220729	220729	3	197354944	4.93199	9.98e-07	0.00104461	0.376183	0.706853	0.992407
cg21685565	GNA12	2768	7	2883529	5.02907	6.14e-07	0.0006827	0.16275	0.870745	0.991702
cg03275056	CHD7	55636	8	61591461	5.12342	3.8e-07	0.00046604	0.688589	0.491227	0.971848
cg04333463	ASPH	444	8	62626687	5.2072	2.46e-07	0.000333959	-2.18673	0.0289727	0.41909
cg05896042	RAB3D	9545	19	11450090	5.21664	2.34e-07	0.000324106	-2.3129	0.020912	0.36634
cg14204735	CYB561	1534	17	61524304	5.26834	1.79e-07	0.000262569	-1.84571	0.0652033	0.602387
cg01939883	IRS2	8660	13	110439453	5.32479	1.33e-07	0.00020547	-1.30481	0.192232	0.842981
cg06263395		0	10	46195640	5.35937	1.1e-07	0.000180767	NA	NA	NA
cg23231729	THEM4	117145	1	151882143	5.40699	8.56e-08	0.000150447	-1.69224	0.0908839	0.669269
cg13689737	HIVEP3	59269	1	42383644	5.49228	5.39e-08	0.000105208	0.800247	0.42374	0.961152
cg15705551	PDIA6	10130	2	10952987	5.58599	3.22e-08	7.65196e-05	-0.817365	0.413897	0.956939
cg15346168	NFATC4	4776	14	24836194	5.69601	1.75e-08	4.68952e-05	2.25027	0.0246287	0.391795
cg13139203	C11orf84	144097	11	63581631	5.72077	1.52e-08	4.2387e-05	0.361921	0.71748	0.991314
cg09868451	MTHFD2	10797	2	74425749	5.7848	1.06e-08	3.19858e-05	0.312624	0.754626	0.993429
cg19562312	ZNF239	8187	10	44069847	5.87904	6.15e-09	1.94486e-05	-0.727479	0.467087	0.969059
cg04318704	ZNF702P	79986	19	53497027	5.901	5.41e-09	1.75162e-05	-1.15003	0.250381	0.894262
cg20381020	LRFN4;PC	78999	11	66624258	5.98847	3.25e-09	1.12824e-05	0.622856	0.533509	0.979518
cg07174053	GPR89A	653519	1	145827038	6.26945	6.03e-10	2.60326e-06	-1.0146	0.310519	0.927482
cg00971676	PRR7	80758	5	176882057	6.32419	4.31e-10	2.11768e-06	-0.0695576	0.944558	0.99414
cg04410073	PRSS23	11098	11	86511545	6.43559	2.16e-10	1.28233e-06	0.16626	0.867983	0.991903
cg07332330	MYO1C	4641	17	1389568	6.57533	8.95e-11	6.71085e-07	0.353148	0.724045	0.991993
cg03451296	CRIP2	1397	14	105940391	6.86021	1.41e-11	1.1839e-07	-0.260289	0.79469	0.993166
cg22220467	PRR19;PAFAH1B3	284338	19	42806228	7.37931	4.13e-13	5.87947e-09	0.367639	0.713213	0.991166
cg01778114	MREG	55686	2	216877947	7.43813	2.73e-13	4.3184e-09	-1.27848	0.201348	0.85357
cg10735116	GPR89B	51463	1	147400532	7.73145	3.33e-14	1.18419e-09	0.581775	0.560838	0.982315
cg00523012	IER2	9592	19	13264324	7.86511	1.25e-14	5.9173e-10	-0.862551	0.388572	0.953932

## Sheet: CESC
								expr	expr	expr
								CESC	CESC	CESC
Composite Element REF	Gene_Symbol	Entrez ID	Chromosome	Genomic_Coordinate	t	p	fdr	t (pos=higher met)	p	FDR
cg19405229	LRRK1	79705	15	101593509	-11.3807	2.84e-25	2.02375e-20	-0.993923	0.321051	0.991019
cg05841486	SH2B3	10019	12	111855929	-10.6436	1e-22	3.56387e-18	0.141823	0.887313	0.996526
cg07640390	SH2B3	10019	12	111855911	-10.1719	3.9e-21	9.2463e-17	0.141823	0.887313	0.996526
cg19861147		0	1	13881542	-9.72547	1.16e-19	2.35425e-15	NA	NA	NA
cg25911171		0	2	1571952	-8.67604	2.44e-16	2.89e-12	NA	NA	NA
cg11908202	LOC100130581	0	17	41456347	-8.65887	2.75e-16	3.01124e-12	NA	NA	NA
cg12334911	TFDP1	7027	13	114290059	-8.55662	5.64e-16	5.35229e-12	-6.85868	3.89174e-11	1.78038e-08
cg09515665	EBF3	253738	10	131686574	-8.491	8.92e-16	7.93487e-12	0.910636	0.363208	0.996324
cg00446595	SBK1	388228	16	28331871	-8.36777	2.1e-15	1.75614e-11	0.943207	0.346324	0.991489
cg18519450	GLI2	2736	2	121746027	-8.32106	2.89e-15	2.28893e-11	0.271295	0.786348	1.00224
cg02469971	TFDP1	7027	13	114287735	-8.23856	5.1e-15	3.81992e-11	-6.85868	3.89174e-11	1.78038e-08
cg10464656	TFDP1	7027	13	114290152	-8.0465	1.88e-14	1.33806e-10	-6.85868	3.89174e-11	1.78038e-08
cg12551635	IFI6	2537	1	27994779	-7.94941	3.61e-14	2.44664e-10	-1.9137	0.0565978	0.727495
cg03480001	TFDP1	7027	13	114287656	-7.86495	6.34e-14	4.10241e-10	-6.85868	3.89174e-11	1.78038e-08
cg05979020	HOXD10	3236	2	176981336	-7.62508	3.07e-13	1.75102e-09	-2.03216	0.0430067	0.673683
cg01446895	SH2B3	10019	12	111856416	-7.51026	6.47e-13	3.54529e-09	0.141823	0.887313	0.996526
cg27533201		0	21	37259319	-7.45108	9.47e-13	4.81817e-09	NA	NA	NA
cg14374760	NTF3	4908	12	5603979	-7.37314	1.56e-12	7.40353e-09	-0.504891	0.614001	1.01555
cg03400811	LOC150185	0	22	19554366	-7.3696	1.6e-12	7.32836e-09	NA	NA	NA
cg13616628		0	15	35385101	-7.35809	1.72e-12	7.6391e-09	NA	NA	NA
cg14028684	H1FNT	341567	12	48723360	-7.30599	2.39e-12	1.03129e-08	-0.332305	0.739888	1.008
cg09751071	GPR123	84435	10	134925816	-7.26199	3.16e-12	1.28431e-08	1.53684	0.125373	0.88301
cg26832552		0	2	620992	-7.20075	4.64e-12	1.73891e-08	NA	NA	NA
cg25327122	HLA-DQB2	3120	6	32729782	-7.19606	4.78e-12	1.745e-08	-1.44186	0.150372	0.907328
cg25605541		0	5	154010983	-7.18205	5.22e-12	1.81213e-08	NA	NA	NA
cg05835547	NLGN4X	57502	X	5811145	-7.07146	1.04e-11	3.3634e-08	0.50371	0.61483	1.015
cg00137385	KIAA0427	9811	18	46288005	-6.94497	2.27e-11	6.86252e-08	0.793765	0.427951	1.00787
cg12955804		0	5	154011120	-6.88995	3.17e-11	9.40131e-08	NA	NA	NA
cg07449094	CHST6	4166	16	75513354	-6.88836	3.2e-11	9.29895e-08	0.356682	0.721577	1.01076
cg20019985		0	11	32008961	-6.86585	3.67e-11	1.04498e-07	NA	NA	NA
cg15961716	COL6A2	1292	21	47532167	-6.7707	6.52e-11	1.7857e-07	-0.0394091	0.96859	0.994884
cg22973226		0	1	46705909	-6.7655	6.73e-11	1.80765e-07	NA	NA	NA
cg14541460		0	9	138150964	-6.7417	7.76e-11	2.04664e-07	NA	NA	NA
cg02490189	NUAK1	9891	12	106460762	-6.71219	9.26e-11	2.39762e-07	-1.074	0.283674	0.978087
cg18115040	HOXD10	3236	2	176981328	-6.68154	1.11e-10	2.77787e-07	-2.03216	0.0430067	0.673683
cg16078060	OOEP	441161	6	74079719	-6.6678	1.21e-10	2.96259e-07	-0.0365362	0.970879	0.9949
cg24721750	MIR127;RTL1	406914	14	101348446	-6.62968	1.51e-10	3.59141e-07	NA	NA	NA
cg05570831	CHST6	4166	16	75513561	-6.62761	1.53e-10	3.57602e-07	0.356682	0.721577	1.01076
cg11325267		0	3	137480853	-6.54751	2.46e-10	5.38284e-07	NA	NA	NA
cg00097020		0	13	64386020	-6.52584	2.79e-10	5.92993e-07	NA	NA	NA
cg05934783	PKP2	5318	12	33049671	-6.47254	3.81e-10	7.86141e-07	-0.609741	0.542489	1.01025
cg10663408	CPA1	1357	7	130021651	-6.44813	4.39e-10	8.93121e-07	-0.128656	0.897715	0.994612
cg22037209		0	X	64627254	-6.44287	4.53e-10	9.07849e-07	NA	NA	NA
cg02831290		0	2	74981833	-6.38011	6.51e-10	1.26952e-06	NA	NA	NA
cg17452880	NUAK1	9891	12	106460837	-6.33705	8.34e-10	1.60423e-06	-1.074	0.283674	0.978087
cg13008301	CSTF1	1477	20	54978749	-6.32769	8.8e-10	1.67015e-06	-0.793232	0.428262	1.00718
cg08323201	SNRPA1	6627	15	101835348	-6.27081	1.22e-09	2.19421e-06	-0.444014	0.657348	1.0172
cg01219451		0	X	64627700	-6.23564	1.49e-09	2.61331e-06	NA	NA	NA
cg05877222		0	6	156952186	-6.22841	1.55e-09	2.68937e-06	NA	NA	NA
cg25715964	CUX1	1523	7	101839236	-6.208	1.74e-09	2.98225e-06	-0.699302	0.484898	1.00468
cg16690577	ODZ3	10178	4	183721716	-6.2067	1.75e-09	2.96858e-06	1.62645	0.10489	0.847926
cg08224787		0	11	50227265	-6.20668	1.75e-09	2.93387e-06	NA	NA	NA
cg27248702	SAPS2	9701	22	50862966	-6.20118	1.81e-09	2.99129e-06	-1.72986	0.0846702	0.819782
cg00860590	CHPF2;MIR671	54480	7	150934650	-6.18898	1.94e-09	3.16768e-06	0.572337	0.567517	1.01156
cg00312009		0	11	59665698	-6.17378	2.11e-09	3.41172e-06	NA	NA	NA
cg07018450		0	12	79198254	-6.17081	2.14e-09	3.43014e-06	NA	NA	NA
cg10439691	TFDP1	7027	13	114290256	-6.16716	2.19e-09	3.46235e-06	-6.85868	3.89174e-11	1.78038e-08
cg18437193	DLGAP2	9228	8	1497307	-6.12357	2.79e-09	4.32548e-06	-0.286726	0.774518	1.00317
cg12311510	SAPS2	9701	22	50873573	-6.11828	2.88e-09	4.40743e-06	-1.72986	0.0846702	0.819782
cg20406730		0	2	620840	-6.11179	2.99e-09	4.52169e-06	NA	NA	NA
cg02401220	EIF1	10209	17	39845253	-6.11156	2.99e-09	4.4798e-06	-0.753403	0.451791	1.00343
cg20777315	ISM1	140862	20	13279761	-6.11064	3e-09	4.45595e-06	-2.38472	0.0177048	0.482245
cg17852221	PCDHA7;PCDHA13;PCDHA12;PCDHA6;PCDHA10;PCDHA4;PCDHA11;PCDHA8;PCDHA1;PCDHA2;PCDHA9;PCDHA5;PCDHA3	56141	5	140263655	-6.09045	3.36e-09	4.83603e-06	0.414437	0.678846	1.01399
cg22964768	RBMXL3;LRCH2	139804	X	114425824	-6.08745	3.42e-09	4.86852e-06	-0.153147	0.878384	0.995776
cg24010988	OOEP	441161	6	74079677	-6.0721	3.72e-09	5.19877e-06	-0.0365362	0.970879	0.9949
cg09247981	CALHM1	255022	10	105215423	-6.06895	3.79e-09	5.23905e-06	-0.313298	0.754269	1.00594
cg26171489	SLCO3A1	28232	15	92459303	-6.03761	4.51e-09	6.11514e-06	-1.31191	0.190542	0.938902
cg05892817	EBF3	253738	10	131638672	-6.02496	4.84e-09	6.49666e-06	0.910636	0.363208	0.996324
cg06872272	ANKRD30A	91074	10	37414768	-6.02165	4.93e-09	6.55476e-06	-0.22939	0.81872	1.00122
cg08066645		0	14	45356892	-6.01677	5.06e-09	6.67137e-06	NA	NA	NA
cg05678191	SALL3	27164	18	76753238	-5.9905	5.85e-09	7.64054e-06	-1.00805	0.314232	0.989855
cg20132903	NXN	64359	17	710584	-5.98903	5.9e-09	7.63278e-06	-1.58734	0.113476	0.868833
cg22246787		0	9	29826562	-5.98234	6.12e-09	7.84771e-06	NA	NA	NA
cg25803630		0	8	29885309	-5.96789	6.62e-09	8.34575e-06	NA	NA	NA
cg13722999		0	9	29826639	-5.96537	6.72e-09	8.38745e-06	NA	NA	NA
cg23792093		0	13	47012437	-5.96114	6.87e-09	8.50992e-06	NA	NA	NA
cg00356769	IGF2BP3	10643	7	23455115	-5.9478	7.39e-09	8.9986e-06	-1.38302	0.167673	0.925694
cg10637370	CHST15	51363	10	125804167	-5.94457	7.53e-09	9.08164e-06	-0.945827	0.344988	0.99303
cg23234820	A4GALT	53947	22	43089041	-5.94402	7.55e-09	9.03241e-06	-2.59008	0.0100576	0.379121
cg22515648		0	10	9449930	-5.94229	7.62e-09	9.04261e-06	NA	NA	NA
cg24629455	PRDM16	63976	1	3163970	-5.94196	7.63e-09	8.98371e-06	-0.246276	0.805635	1.00096
cg08531017	DSCAML1	57453	11	117352692	-5.92605	8.33e-09	9.48649e-06	0.701804	0.483338	1.00559
cg23695714	FHOD3	80206	18	34340680	-5.91025	9.08e-09	1.02587e-05	-0.989093	0.323404	0.992348
cg03016985	TFDP1	7027	13	114279998	-5.90841	9.17e-09	1.02802e-05	-6.85868	3.89174e-11	1.78038e-08
cg14813037		0	20	6193833	-5.90287	9.45e-09	1.05126e-05	NA	NA	NA
cg15836983	GLTSCR1	29998	19	48185455	-5.89583	9.82e-09	1.08382e-05	2.29304	0.0225283	0.537927
cg11226042	PGBD5	79605	1	230492933	-5.89505	9.86e-09	1.08009e-05	-0.475837	0.634532	1.01562
cg19150007	KCND2	3751	7	119915076	-5.89298	9.97e-09	1.08396e-05	0.955995	0.339835	0.9921
cg23996979	GLI2	2736	2	121742161	-5.89118	1.01e-08	1.08632e-05	0.271295	0.786348	1.00224
cg15780870	RIMBP2	23504	12	130953802	-5.86668	1.15e-08	1.23149e-05	-0.787561	0.431567	1.00498
cg21433852		0	2	239542239	-5.85914	1.2e-08	1.2733e-05	NA	NA	NA
cg17786661	DIP2C	22982	10	686080	-5.82398	1.45e-08	1.51705e-05	-3.06797	0.00234923	0.151563
cg27353899	MUC4	4585	3	195488922	-5.80141	1.64e-08	1.68813e-05	-1.17003	0.242907	0.974
cg05670219	LOC100289673	0	5	109220987	-5.79401	1.7e-08	1.74393e-05	NA	NA	NA
cg23251122	RASD2	23551	22	35947995	-5.76187	2.02e-08	2.04235e-05	-1.13282	0.258181	0.973753
cg19789417		0	3	149768455	-5.75222	2.13e-08	2.13528e-05	NA	NA	NA
cg04949226	ANKRD11	29123	16	89348469	-5.75101	2.14e-08	2.1193e-05	-3.93112	0.000104753	0.0121882
cg13331200	CADM2	253559	3	85008587	-5.74738	2.19e-08	2.14586e-05	0.576748	0.564536	1.01135
cg16557858	ERBB2	2064	17	37879740	-5.73669	2.31e-08	2.24081e-05	-0.46204	0.644383	1.01461
cg01712700	CAPN10	11132	2	241535695	-5.70466	2.74e-08	2.62125e-05	0.587368	0.557392	1.01042
cg01105140		0	1	149137869	-5.69588	2.87e-08	2.70982e-05	NA	NA	NA
cg24826118		0	14	62331547	-5.68124	3.11e-08	2.89001e-05	NA	NA	NA
cg15819109	MUC2	4583	11	1096334	-5.67984	3.13e-08	2.89265e-05	-1.53569	0.125655	0.883447
cg15023038	TCTE1	202500	6	44254022	-5.66374	3.41e-08	3.1292e-05	0.911552	0.362727	0.995953
cg13568107	TMEM198	130612	2	220412529	-5.66371	3.41e-08	3.10959e-05	0.0296283	0.976383	0.995624
cg10085623		0	4	189552622	-5.65408	3.58e-08	3.2508e-05	NA	NA	NA
cg22963959		0	14	45356673	-5.65041	3.65e-08	3.2933e-05	NA	NA	NA
cg19508555		0	21	11107031	-5.64882	3.69e-08	3.30012e-05	NA	NA	NA
cg11705975	PRLHR	2834	10	120354248	-5.62421	4.19e-08	3.70951e-05	1.25305	0.211151	0.956187
cg01872771	BEND2	139105	X	18238981	-5.62237	4.23e-08	3.72236e-05	-0.464651	0.642514	1.01484
cg21774842		0	12	6586821	-5.60732	4.58e-08	4.00332e-05	NA	NA	NA
cg00056489	SH2B3	10019	12	111856652	-5.60448	4.65e-08	4.03849e-05	0.141823	0.887313	0.996526
cg00066925		0	12	48921980	-5.59654	4.85e-08	4.18428e-05	NA	NA	NA
cg03647317		0	4	187891568	-5.59264	4.95e-08	4.2195e-05	NA	NA	NA
cg03730428		0	11	32009004	-5.59241	4.95e-08	4.19925e-05	NA	NA	NA
cg13677577	FAT2	2196	5	150911349	-5.54486	6.35e-08	5.28569e-05	-0.485052	0.627989	1.01639
cg18814929		0	7	128171378	-5.54225	6.43e-08	5.29584e-05	NA	NA	NA
cg13966609	DSCAML1	57453	11	117352730	-5.52405	7.07e-08	5.78649e-05	0.701804	0.483338	1.00559
cg23619365		0	13	112712009	-5.51346	7.47e-08	6.07756e-05	NA	NA	NA
cg00388897	KLHL35	283212	11	75136655	-5.50842	7.67e-08	6.20252e-05	-0.520479	0.603109	1.01479
cg06371443	CASR	846	3	121949308	-5.50826	7.67e-08	6.17256e-05	1.54538	0.123294	0.882573
cg07204163	FLJ40434	0	1	53904319	-5.49492	8.22e-08	6.57561e-05	NA	NA	NA
cg05005577		0	22	18669132	-5.48671	8.58e-08	6.78377e-05	NA	NA	NA
cg25693099	DLGAP1	9229	18	3879303	-5.48629	8.59e-08	6.76095e-05	-0.662724	0.508009	1.00915
cg05752653	TKTL2	84076	4	164394898	-5.48523	8.64e-08	6.76047e-05	-0.176477	0.860037	0.996872
cg20033239	LOC84856	0	10	42972782	-5.48328	8.73e-08	6.79157e-05	NA	NA	NA
cg21640261		0	12	79198356	-5.47935	8.91e-08	6.89271e-05	NA	NA	NA
cg22301080	NXN	64359	17	710738	-5.47888	8.93e-08	6.87175e-05	-1.58734	0.113476	0.868833
cg03441493		0	Y	14074417	-5.47409	9.15e-08	6.96788e-05	NA	NA	NA
cg13471336	DIP2C	22982	10	669170	-5.47409	9.15e-08	6.93102e-05	-3.06797	0.00234923	0.151563
cg03244616	RIMBP2	23504	12	130935837	-5.47303	9.2e-08	6.93207e-05	-0.787561	0.431567	1.00498
cg07315937		0	6	29768269	-5.4729	9.21e-08	6.9003e-05	NA	NA	NA
cg19509405		0	21	15456605	-5.46599	9.54e-08	7.11224e-05	NA	NA	NA
cg07555125	PCDHA1;PCDHA2	56147	5	140175691	-5.46075	9.8e-08	7.26799e-05	-0.0378027	0.96987	0.994727
cg09428340	PACRG	135138	6	163570371	-5.45896	9.89e-08	7.29724e-05	0.395693	0.692609	1.01128
cg24876492		0	21	43725882	-5.45403	1.01e-07	7.44551e-05	NA	NA	NA
cg16467318	NUAK1	9891	12	106460704	-5.44919	1.04e-07	7.59331e-05	-1.074	0.283674	0.978087
cg12495069	PXDN	7837	2	1652362	-5.44468	1.06e-07	7.73132e-05	-0.274419	0.783949	1.00242
cg05392169	OLFM1	10439	9	138011814	-5.43841	1.1e-07	7.94296e-05	-1.26324	0.207471	0.952813
cg26351229	ADCY8	114	8	132053780	-5.43261	1.13e-07	8.14095e-05	1.38037	0.168485	0.926877
cg10097458		0	10	59866772	-5.43191	1.14e-07	8.1291e-05	NA	NA	NA
cg12641021	BEND7	222389	10	13516370	-5.43039	1.14e-07	8.15167e-05	-1.48486	0.138618	0.896608
cg18770076	C6orf176	90632	6	166354232	-5.42324	1.19e-07	8.41269e-05	-0.573461	0.566757	1.01182
cg18474108	PABPC3	5042	13	25670319	-5.42025	1.21e-07	8.49983e-05	1.43248	0.153034	0.911634
cg26189472	CAPS2	84698	12	75699512	-5.41915	1.21e-07	8.50537e-05	0.746483	0.455953	1.00447
cg25964517		0	4	78034545	-5.41737	1.22e-07	8.5413e-05	NA	NA	NA
cg03852680		0	12	6586824	-5.41323	1.25e-07	8.68085e-05	NA	NA	NA
cg04635983		0	5	3602558	-5.40898	1.28e-07	8.82803e-05	NA	NA	NA
cg15630827		0	13	69558928	-5.40564	1.3e-07	8.9359e-05	NA	NA	NA
cg25963309	ADARB2	105	10	1742854	-5.40182	1.32e-07	9.06764e-05	-1.16101	0.246547	0.973279
cg20305028	GLI2	2736	2	121746850	-5.40014	1.34e-07	9.10212e-05	0.271295	0.786348	1.00224
cg00461905		0	18	77315962	-5.39549	1.37e-07	9.27542e-05	NA	NA	NA
cg09142848		0	8	850121	-5.3939	1.38e-07	9.30643e-05	NA	NA	NA
cg19821098	DSCAML1	57453	11	117352790	-5.39201	1.39e-07	9.35213e-05	0.701804	0.483338	1.00559
cg20980587	SALL3	27164	18	76753905	-5.39092	1.4e-07	9.3597e-05	-1.00805	0.314232	0.989855
cg10477621	FERD3L	222894	7	19184950	-5.38949	1.41e-07	9.38383e-05	-0.161784	0.871583	0.996258
cg23087358	GLI2	2736	2	121745872	-5.38136	1.47e-07	9.73431e-05	0.271295	0.786348	1.00224
cg08406714	RRP1	8568	21	45223723	-5.37775	1.5e-07	9.82268e-05	-0.400506	0.689065	1.01168
cg15179985	KIAA0427	9811	18	46287958	-5.37001	1.56e-07	0.000101693	0.793765	0.427951	1.00787
cg14343205		0	14	45356797	-5.36931	1.56e-07	0.000101125	NA	NA	NA
cg02193951	SALL3	27164	18	76753446	-5.36864	1.57e-07	0.000101011	-1.00805	0.314232	0.989855
cg07541443	TFDP1	7027	13	114260546	-5.36338	1.61e-07	0.000103271	-6.85868	3.89174e-11	1.78038e-08
cg09663836	FBRSL1	57666	12	133102331	-5.35935	1.64e-07	0.000104925	0.599172	0.549504	1.01013
cg01571660	KPRP	448834	1	152733223	-5.34421	1.77e-07	0.000112762	-0.319776	0.749358	1.00666
cg02530668		0	2	242789515	-5.34046	1.81e-07	0.00011441	NA	NA	NA
cg21278723	HIPK4	147746	19	40886968	-5.33661	1.84e-07	0.000116138	-0.884319	0.377223	0.997388
cg14921533	C18orf1	753	18	13498947	-5.33618	1.85e-07	0.000115878	-1.1759	0.240553	0.974266
cg13948652	MYO16	23026	13	109792494	-5.31314	2.07e-07	0.000127322	0.341461	0.732992	1.00919
cg26948176		0	13	114066988	-5.31211	2.09e-07	0.000127435	NA	NA	NA
cg00617867	PCDHA6;PCDHA2;PCDHA1;PCDHA9;PCDHA7;PCDHA5;PCDHA10;PCDHA3;PCDHA4;PCDHA8	56142	5	140242373	-5.31128	2.09e-07	0.000127425	0.115675	0.907986	0.995797
cg08031810		0	2	52856918	-5.30983	2.11e-07	0.00012781	NA	NA	NA
cg05324014		0	15	93975794	-5.30792	2.13e-07	0.00012849	NA	NA	NA
cg03236397	HPSE2	60495	10	100992429	-5.30778	2.13e-07	0.000128041	-0.994604	0.32072	0.990453
cg11997603	AP2A2	161	11	1008177	-5.28808	2.35e-07	0.000140158	-0.930617	0.35279	0.993469
cg01000954	PCDHGA4;PCDHGA12;PCDHGA11;PCDHGA9;PCDHGA1;PCDHGB1;PCDHGB6;PCDHGB3;PCDHGB7;PCDHGA6;PCDHGA8;PCDHGA10;PCDHGA5;PCDHGB4;PCDHGA3;PCDHGA2;PCDHGB2;PCDHGA7;PCDHGB5	56111	5	140821244	-5.288	2.35e-07	0.000139628	-0.378441	0.705367	1.01171
cg04566796		0	6	29768275	-5.28076	2.44e-07	0.000143584	NA	NA	NA
cg05276066	HDGFL1	154150	6	22569604	-5.28058	2.44e-07	0.000143121	-0.307363	0.758778	1.00596
cg18172877	IRX4	50805	5	1878672	-5.27996	2.45e-07	0.000142978	-1.60023	0.110587	0.86246
cg13427880	GATA6	2627	18	19757016	-5.27333	2.53e-07	0.000146593	-0.659668	0.509967	1.00965
cg14002772	SMARCA2	6595	9	2047373	-5.27126	2.56e-07	0.000147521	-1.01126	0.312695	0.991531
cg21869219	CDGAP	57514	3	119120865	-5.26569	2.63e-07	0.000151073	-0.578418	0.563411	1.01104
cg06757138	FHOD3	80206	18	34340585	-5.25807	2.73e-07	0.000156296	-0.989093	0.323404	0.992348
cg09353999		0	4	117520552	-5.25549	2.77e-07	0.000157682	NA	NA	NA
cg23241772	RASA3	22821	13	114861875	-5.25414	2.79e-07	0.000158119	-0.70202	0.483204	1.00573
cg02547394	SOX1	6656	13	112721789	-5.25108	2.83e-07	0.000159911	-0.413624	0.679441	1.01375
cg05803790		0	9	80765939	-5.2445	2.92e-07	0.000164582	NA	NA	NA
cg04521004	SHOX2	6474	3	157821262	-5.24354	2.94e-07	0.000164718	-3.19682	0.00153581	0.111203
cg15520863	C1GALT1C1	29071	X	119763941	-5.2391	3e-07	0.000167736	-0.192195	0.847718	0.998111
cg18522808	CHST8	64377	19	34263414	-5.2388	3.01e-07	0.000167327	0.254977	0.798913	1.00201
cg03444184		0	11	49456196	-5.2373	3.03e-07	0.000167923	NA	NA	NA
cg09205538		0	15	37783062	-5.23706	3.03e-07	0.000167478	NA	NA	NA
cg06371291		0	18	77339077	-5.2361	3.05e-07	0.000167625	NA	NA	NA
cg16968475	MAD1L1	8379	7	2027283	-5.23536	3.06e-07	0.000167596	-0.0907625	0.927741	0.995495
cg10069489	IL1F8	27177	2	113808530	-5.2322	3.11e-07	0.0001696	-0.936092	0.349969	0.994007
cg03107912	RASA3	22821	13	114841579	-5.22171	3.27e-07	0.000176635	-0.70202	0.483204	1.00573
cg08324703	DIP2C	22982	10	679514	-5.22108	3.29e-07	0.000176515	-3.06797	0.00234923	0.151563
cg12994911	KIAA0664	23277	17	2601979	-5.21344	3.41e-07	0.000181959	1.69123	0.0918184	0.830657
cg02360939	GATA6	2627	18	19757022	-5.2132	3.42e-07	0.000181487	-0.659668	0.509967	1.00965
cg09765089		0	7	27291346	-5.21065	3.46e-07	0.000183115	NA	NA	NA
cg05046305	PCDHGA2;PCDHGA1	56113	5	140720149	-5.20894	3.49e-07	0.00018399	0.242406	0.808629	1.00085
cg04438558	PCDHGA2;PCDHGA3;PCDHGA1	56113	5	140723899	-5.20375	3.58e-07	0.000188076	0.242406	0.808629	1.00085
cg10536346		0	7	136849262	-5.20041	3.64e-07	0.000190503	NA	NA	NA
cg26538093	PDZRN4	29951	12	41967459	-5.19784	3.69e-07	0.000192233	0.952791	0.341453	0.993079
cg14534701		0	5	122971865	-5.1944	3.75e-07	0.000194815	NA	NA	NA
cg22867608	EGR2	1959	10	64573356	-5.194	3.76e-07	0.000194488	-0.210131	0.833706	0.998968
cg24221648		0	13	79170283	-5.19308	3.77e-07	0.000194666	NA	NA	NA
cg09753064	JPH2	57158	20	42788303	-5.19135	3.81e-07	0.000195628	-0.743849	0.457543	1.00271
cg10008710	C19orf21	126353	19	758400	-5.18995	3.83e-07	0.000196276	-1.39179	0.165003	0.922084
cg18343437		0	8	142528415	-5.18131	4e-07	0.000204094	NA	NA	NA
cg03214640	COL6A2	1292	21	47546211	-5.172	4.19e-07	0.000212911	-0.0394091	0.96859	0.994884
cg06855336	L3MBTL4	91133	18	6284379	-5.17042	4.22e-07	0.000213804	-0.162863	0.870735	0.996589
cg19882119	FAM20C	56975	7	207069	-5.16973	4.23e-07	0.000213776	-1.25178	0.211611	0.955693
cg10672804	CBS	875	21	44477738	-5.16425	4.35e-07	0.000218844	-1.08286	0.279727	0.977539
cg18115081	RELB	5971	19	45515326	-5.15662	4.52e-07	0.000226395	-2.04262	0.0419527	0.668619
cg00144039		0	8	789924	-5.15473	4.56e-07	0.000227704	NA	NA	NA
cg18358136	EML2	24139	19	46119636	-5.1467	4.74e-07	0.000235216	-0.919755	0.35843	0.995563
cg22018815	ERBB2	2064	17	37879654	-5.14096	4.88e-07	0.000241087	-0.46204	0.644383	1.01461
cg03337578		0	15	37783027	-5.12842	5.18e-07	0.000254585	NA	NA	NA
cg02113641	PABPC3	5042	13	25670183	-5.12775	5.2e-07	0.000254532	1.43248	0.153034	0.911634
cg06460400	PXDN	7837	2	1670202	-5.12319	5.32e-07	0.000259385	-0.274419	0.783949	1.00242
cg10364040	HOXD10	3236	2	176981064	-5.11445	5.55e-07	0.00026885	-2.03216	0.0430067	0.673683
cg22875527	PGBD5	79605	1	230492944	-5.11438	5.55e-07	0.000268033	-0.475837	0.634532	1.01562
cg22677260	BRSK1	84446	19	55814218	-5.11307	5.59e-07	0.000268848	0.876036	0.381702	0.997829
cg15235614	PDZRN4	29951	12	41967276	-5.11268	5.6e-07	0.000268448	0.952791	0.341453	0.993079
cg27209278	ZNRF4	148066	19	5455482	-5.10281	5.88e-07	0.000280736	4.63103	5.4001e-06	0.000890972
cg00007466	ZNF358	140467	19	7585086	-5.09857	6e-07	0.000285634	0.2537	0.799899	1.00194
cg14736210	KCNB1	3745	20	48098642	-5.08348	6.45e-07	0.000305346	-0.42803	0.668932	1.01538
cg05660005	RBM8A	9939	1	145507663	-5.08199	6.5e-07	0.000306546	1.58149	0.114805	0.87336
cg04130455		0	4	189580331	-5.0816	6.51e-07	0.000306105	NA	NA	NA
cg09905789	SPHK2	56848	19	49132858	-5.08054	6.55e-07	0.00030667	2.04186	0.0420288	0.668772
cg22704696	PHOSPHO1	162466	17	47302476	-5.07938	6.58e-07	0.000307389	0.282899	0.777447	1.00232
cg00106591		0	16	34209017	-5.07929	6.59e-07	0.000306521	NA	NA	NA
cg00679681	ANKRD11	29123	16	89346491	-5.07707	6.66e-07	0.000308836	-3.93112	0.000104753	0.0121882
cg21413133	ATP2B2	491	3	10400395	-5.07588	6.7e-07	0.000309617	0.267465	0.789293	1.00212
cg08405073	CCDC159;TMEM205	126075	19	11456857	-5.07214	6.82e-07	0.000314257	0.0250937	0.979997	0.996331
cg14304626	ANKRD11	29123	16	89347958	-5.07086	6.86e-07	0.000315196	-3.93112	0.000104753	0.0121882
cg07832178	C7orf72	100130988	7	50198848	-5.06757	6.97e-07	0.000319238	-0.187107	0.851702	0.997957
cg18023096	psiTPTE22	387590	22	17090586	-5.06696	6.99e-07	0.000319161	-0.424815	0.671272	1.0148
cg13050556		0	17	80180068	-5.06365	7.11e-07	0.000322248	NA	NA	NA
cg20929387	AFAP1;LOC84740	60312	4	7774510	-5.06336	7.12e-07	0.000321681	-0.943851	0.345995	0.991535
cg11123583	NXN	64359	17	744766	-5.06188	7.17e-07	0.000322969	-1.58734	0.113476	0.868833
cg12708841		0	18	76463655	-5.0538	7.45e-07	0.000334781	NA	NA	NA
cg22770088		0	4	132666907	-5.04932	7.62e-07	0.000341032	NA	NA	NA
cg04988994	SALL3	27164	18	76753357	-5.04485	7.78e-07	0.000347389	-1.00805	0.314232	0.989855
cg24298476	HLA-DQB2	3120	6	32729808	-5.04043	7.95e-07	0.000351571	-1.44186	0.150372	0.907328
cg02161906		0	16	34586894	-5.03819	8.04e-07	0.000352108	NA	NA	NA
cg18794122	PXDN	7837	2	1652585	-5.03693	8.09e-07	0.000353162	-0.274419	0.783949	1.00242
cg19603885	MIR432;MIR136;RTL1	574451	14	101349736	-5.02768	8.45e-07	0.000368142	NA	NA	NA
cg13880617	NFATC1	4772	18	77235509	-5.01135	9.14e-07	0.000395794	-1.28061	0.201305	0.94741
cg26248373		0	2	1572462	-4.9988	9.71e-07	0.000417827	NA	NA	NA
cg21158087		0	17	58216415	-4.99277	1e-06	0.000427486	NA	NA	NA
cg15074709		0	13	112547653	-4.98803	1.02e-06	0.000435994	NA	NA	NA
cg16309606	SRD5A1P1	6719	X	138529300	-4.98794	1.02e-06	0.000434883	NA	NA	NA
cg18995558	TPO	7173	2	1544370	-4.98482	1.04e-06	0.00044012	-0.466694	0.641053	1.01469
cg04480158		0	8	986271	-4.98474	1.04e-06	0.000438978	NA	NA	NA
cg21207731		0	2	213696350	-4.97972	1.06e-06	0.000448313	NA	NA	NA
cg00140112	DLGAP1	9229	18	3879595	-4.97835	1.07e-06	0.000449918	-0.662724	0.508009	1.00915
cg26644049		0	19	57276917	-4.96994	1.12e-06	0.000466975	NA	NA	NA
cg24528765		0	6	169261426	-4.96342	1.15e-06	0.000478913	NA	NA	NA
cg21094465		0	21	15148636	-4.96219	1.16e-06	0.000480335	NA	NA	NA
cg06252355	MUC4	4585	3	195477915	-4.96067	1.17e-06	0.000482407	-1.17003	0.242907	0.974
cg17555373		0	13	53775108	-4.95472	1.2e-06	0.000494848	NA	NA	NA
cg09123431		0	20	52209811	-4.95317	1.21e-06	0.000497072	NA	NA	NA
cg07470001	NXN	64359	17	850499	-4.94544	1.25e-06	0.000514208	-1.58734	0.113476	0.868833
cg05369327		0	14	95826853	-4.94441	1.26e-06	0.000515243	NA	NA	NA
cg09731029	BEND2	139105	X	18238652	-4.94439	1.26e-06	0.000513807	-0.464651	0.642514	1.01484
cg23294090	FAM135B	51059	8	139509672	-4.94294	1.27e-06	0.000515887	2.29239	0.022566	0.537552
cg10014005		0	17	22051978	-4.938	1.3e-06	0.00052662	NA	NA	NA
cg03519593	EPX	8288	17	56274597	-4.93532	1.31e-06	0.000531847	1.85979	0.0638804	0.763115
cg11252141	CAPS2	84698	12	75699490	-4.93109	1.34e-06	0.00054111	0.746483	0.455953	1.00447
cg00525436		0	21	15456343	-4.93042	1.35e-06	0.000541283	NA	NA	NA
cg05512684	ERBB2	2064	17	37879858	-4.9296	1.35e-06	0.00054188	-0.46204	0.644383	1.01461
cg27020953	MUC2	4583	11	1096455	-4.92587	1.38e-06	0.000548445	-1.53569	0.125655	0.883447
cg21734751	RPTOR	57521	17	78896437	-4.92055	1.41e-06	0.000560865	0.133181	0.894138	0.994591
cg02746340		0	6	170239172	-4.91729	1.43e-06	0.000568013	NA	NA	NA
cg02380278	ZNF366	167465	5	71756236	-4.91152	1.47e-06	0.000582094	0.793716	0.42798	1.00782
cg00253339	MVP	9961	16	29855911	-4.91119	1.47e-06	0.000581389	-1.60721	0.109046	0.860108
cg10744714	FAM20C	56975	7	207750	-4.90505	1.52e-06	0.000595202	-1.25178	0.211611	0.955693
cg05293502	FAM48B1	170067	X	24380421	-4.90403	1.52e-06	0.00059645	2.26162	0.0244273	0.551849
cg14069279		0	9	98113462	-4.90175	1.54e-06	0.000601245	NA	NA	NA
cg10927727		0	2	130986183	-4.89858	1.56e-06	0.000608648	NA	NA	NA
cg11507770		0	11	129488102	-4.89104	1.62e-06	0.000628972	NA	NA	NA
cg04180086	IRX4	50805	5	1878499	-4.88859	1.64e-06	0.000632806	-1.60023	0.110587	0.86246
cg27573735		0	3	82857144	-4.88576	1.66e-06	0.000639559	NA	NA	NA
cg21028671	MAD1L1	8379	7	2029240	-4.88564	1.66e-06	0.000638215	-0.0907625	0.927741	0.995495
cg09704448	S1PR2	9294	19	10335095	-4.88357	1.68e-06	0.000642738	1.17654	0.2403	0.974023
cg13945567	FAM160A1	729830	4	152330465	-4.88308	1.68e-06	0.000642474	-0.446694	0.655414	1.01702
cg05247780		0	19	360141	-4.88068	1.7e-06	0.000648047	NA	NA	NA
cg20160695		0	6	90596588	-4.87366	1.76e-06	0.000668	NA	NA	NA
cg12858261	IL1F8	27177	2	113808755	-4.87238	1.77e-06	0.00067026	-0.936092	0.349969	0.994007
cg04543938		0	6	28956426	-4.86872	1.8e-06	0.000678263	NA	NA	NA
cg14088090	TMEM125	128218	1	43738485	-4.86861	1.8e-06	0.000676838	0.0057397	0.995424	0.998948
cg00638202		0	21	37259424	-4.86738	1.81e-06	0.000678954	NA	NA	NA
cg18721420	CCDC105	126402	19	15121913	-4.8662	1.82e-06	0.00068092	-0.149022	0.881635	0.995593
cg00361562	BOLL	66037	2	198649771	-4.86595	1.82e-06	0.000679962	1.28798	0.198733	0.945696
cg01415995	GAL3ST3	89792	11	65811095	-4.86457	1.84e-06	0.000682573	1.22081	0.223104	0.965777
cg07673838	SDK1	221935	7	4169752	-4.86383	1.84e-06	0.000683176	-1.45431	0.146893	0.902016
cg04826882	RASA3	22821	13	114838756	-4.8623	1.86e-06	0.000686317	-0.70202	0.483204	1.00573
cg13658962	HIPK4	147746	19	40886898	-4.85798	1.89e-06	0.00069673	-0.884319	0.377223	0.997388
cg11940136		0	11	49071438	-4.85768	1.9e-06	0.000695907	NA	NA	NA
cg19962075	MAPK4	5596	18	48256050	-4.85576	1.91e-06	0.00069861	-0.148339	0.882174	0.995642
cg26462906		0	X	80259352	-4.8516	1.95e-06	0.000710538	NA	NA	NA
cg18590092	NFATC1	4772	18	77253976	-4.85053	1.96e-06	0.000712289	-1.28061	0.201305	0.94741
cg26057682		0	21	15038314	-4.8472	1.99e-06	0.000721636	NA	NA	NA
cg05638493	SLC25A2	83884	5	140683367	-4.84336	2.03e-06	0.000732833	-0.242728	0.80838	1.00091
cg12746947	EPHA10	284656	1	38227094	-4.83897	2.07e-06	0.000744241	0.314356	0.753466	1.00614
cg23365097		0	18	515465	-4.83884	2.07e-06	0.000742829	NA	NA	NA
cg03413208		0	3	160879619	-4.83851	2.07e-06	0.000742125	NA	NA	NA
cg21480165	PABPC3	5042	13	25670170	-4.83676	2.09e-06	0.000746325	1.43248	0.153034	0.911634
cg18455490	UBE2E3	10477	2	181845411	-4.83632	2.1e-06	0.000746001	-2.11246	0.035462	0.630579
cg10712934	DIP2C	22982	10	686201	-4.83606	2.1e-06	0.000745021	-3.06797	0.00234923	0.151563
cg13675319		0	9	31254329	-4.82829	2.18e-06	0.000768706	NA	NA	NA
cg04213089	L3MBTL4	91133	18	6284382	-4.82791	2.18e-06	0.000768164	-0.162863	0.870735	0.996589
cg15822010	FAM20C	56975	7	206484	-4.82587	2.2e-06	0.000773609	-1.25178	0.211611	0.955693
cg16929318		0	21	15451292	-4.82382	2.22e-06	0.000779131	NA	NA	NA
cg16519742	ZIM2	23619	19	57306847	-4.81698	2.29e-06	0.000802368	4.35229	1.84242e-05	0.0026874
cg23224666	C6orf174	387104	6	127796287	-4.81159	2.35e-06	0.000816748	0.481282	0.630662	1.0163
cg26048025	GPR25	2848	1	200843156	-4.80879	2.38e-06	0.000825445	-0.61997	0.535742	1.01058
cg24862851	FAM9A	171482	X	8769404	-4.80724	2.4e-06	0.0008294	0.434838	0.663988	1.01545
cg10688508		0	2	52799970	-4.80612	2.41e-06	0.000829675	NA	NA	NA
cg24874828		0	4	187887005	-4.80349	2.44e-06	0.000837877	NA	NA	NA
cg15023313	ANKRD30A	91074	10	37414759	-4.80272	2.45e-06	0.000838861	-0.22939	0.81872	1.00122
cg26063629	PXDN	7837	2	1652518	-4.80172	2.46e-06	0.000840711	-0.274419	0.783949	1.00242
cg19647607	ISM1	140862	20	13279946	-4.80134	2.47e-06	0.000840202	-2.38472	0.0177048	0.482245
cg17844339	CHST11	50515	12	105150990	-4.80081	2.47e-06	0.000840273	-2.07808	0.0385407	0.650826
cg10666224		0	6	29768246	-4.79258	2.57e-06	0.00087089	NA	NA	NA
cg02705011	SALL3	27164	18	76752660	-4.7883	2.62e-06	0.000884147	-1.00805	0.314232	0.989855
cg12591125	MAD1L1	8379	7	1885375	-4.78566	2.65e-06	0.000892909	-0.0907625	0.927741	0.995495
cg07720403	PNPLA6	10908	19	7622127	-4.77954	2.73e-06	0.00091639	0.551074	0.581988	1.01164
cg16519487		0	13	20876063	-4.77699	2.76e-06	0.000925082	NA	NA	NA
cg21154964	HECW1	23072	7	43484715	-4.77682	2.76e-06	0.000923646	-1.58021	0.115098	0.872946
cg06793484	FAM20C	56975	7	207605	-4.77192	2.83e-06	0.000942598	-1.25178	0.211611	0.955693
cg11774633		0	3	99944331	-4.77025	2.85e-06	0.000947689	NA	NA	NA
cg17220574	DIP2C	22982	10	395292	-4.76539	2.91e-06	0.000964696	-3.06797	0.00234923	0.151563
cg00908381		0	14	104896758	-4.7646	2.92e-06	0.000965999	NA	NA	NA
cg11825002	PGBD5	79605	1	230468773	-4.76439	2.93e-06	0.000964696	-0.475837	0.634532	1.01562
cg06084244	NFATC1	4772	18	77234239	-4.76423	2.93e-06	0.000963149	-1.28061	0.201305	0.94741
cg09140593	MYBPC3	4607	11	47360071	-4.76295	2.95e-06	0.000966622	0.409126	0.682735	1.01303
cg09042277	TBX5	6910	12	114840854	-4.76182	2.96e-06	0.00096947	3.1414	0.00184698	0.126027
cg17971086	SAPS2	9701	22	50873400	-4.76077	2.98e-06	0.000969712	-1.72986	0.0846702	0.819782
cg10872967	FAM20C	56975	7	224133	-4.76037	2.98e-06	0.000969263	-1.25178	0.211611	0.955693
cg14537953	IL1F8	27177	2	113808683	-4.75899	3e-06	0.000973247	-0.936092	0.349969	0.994007
cg26615017	ERBB2	2064	17	37879657	-4.7581	3.01e-06	0.000975035	-0.46204	0.644383	1.01461
cg17856063		0	1	146543992	-4.75621	3.04e-06	0.000981323	NA	NA	NA
cg03631459		0	10	54631369	-4.75504	3.06e-06	0.000984402	NA	NA	NA
cg24534048		0	10	134826206	-4.7538	3.07e-06	0.000987817	NA	NA	NA
cg18100702	IRX1	79192	5	3600572	-4.75123	3.11e-06	0.000997337	1.15577	0.248683	0.97388
cg06644844	ANKRD30A	91074	10	37414506	-4.7511	3.11e-06	0.000995681	-0.22939	0.81872	1.00122
cg22694548	ZNRF4	148066	19	5455843	-4.7492	3.14e-06	0.00100217	4.63103	5.4001e-06	0.000890972
cg25366140	PTPRN2	5799	7	157561161	-4.74635	3.18e-06	0.0010109	0.197306	0.84372	0.998721
cg10124710		0	1	146544267	-4.74453	3.21e-06	0.00101711	NA	NA	NA
cg13999664		0	6	169331838	-4.74431	3.21e-06	0.00101591	NA	NA	NA
cg17636883		0	6	56297263	-4.74398	3.22e-06	0.00101519	NA	NA	NA
cg11193419		0	8	58173162	-4.74089	3.26e-06	0.00102289	NA	NA	NA
cg00853671		0	12	129331490	-4.7383	3.3e-06	0.00103289	NA	NA	NA
cg08837192		0	11	23752360	-4.73342	3.38e-06	0.00105397	NA	NA	NA
cg25297146	DIP2C	22982	10	679399	-4.73141	3.41e-06	0.00106142	-3.06797	0.00234923	0.151563
cg02895081		0	8	1151175	-4.73128	3.41e-06	0.00105973	NA	NA	NA
cg11860886		0	14	106857312	-4.72984	3.43e-06	0.00106444	NA	NA	NA
cg12405983	ZSCAN18	65982	19	58630240	-4.72965	3.43e-06	0.00106306	1.61671	0.106978	0.855868
cg08363671	LOC145814	0	15	99512700	-4.72948	3.44e-06	0.00106158	NA	NA	NA
cg09286626		0	11	113660999	-4.72753	3.47e-06	0.00106883	NA	NA	NA
cg06664147	ANKRD11	29123	16	89371698	-4.7268	3.48e-06	0.00107007	-3.93112	0.000104753	0.0121882
cg05036191	SNTG2	54221	2	1052729	-4.72515	3.51e-06	0.00107588	-0.177798	0.859	0.997106
cg05403744	GLI2	2736	2	121746753	-4.72294	3.54e-06	0.0010845	0.271295	0.786348	1.00224
cg26761110	SH2B3	10019	12	111855897	-4.71989	3.59e-06	0.0010974	0.141823	0.887313	0.996526
cg07600549	PLXNB2	23654	22	50726149	-4.71836	3.62e-06	0.00110276	-0.966328	0.334648	0.991775
cg06781788	CRYGN	155051	7	151129263	-4.71487	3.67e-06	0.00111336	-0.394781	0.693281	1.01109
cg16253249	NFATC1	4772	18	77211212	-4.71421	3.69e-06	0.00111438	-1.28061	0.201305	0.94741
cg12764034	LHX8	431707	1	75602846	-4.71043	3.75e-06	0.00112904	-0.279529	0.780029	1.00199
cg10494028	C6orf147	80759	6	74008821	-4.70591	3.83e-06	0.00115019	-2.73533	0.00659779	0.293172
cg03335262	PCDHB17	54661	5	140536920	-4.69698	3.99e-06	0.00119554	-0.685348	0.493647	1.00787
cg00907008	CHL1	10752	3	350892	-4.69553	4.01e-06	0.00120094	0.629438	0.529535	1.01043
cg03011993	C16orf38	390667	16	1536078	-4.69169	4.09e-06	0.00121709	-0.567029	0.571113	1.01125
cg20300343		0	1	149719461	-4.68112	4.29e-06	0.00126917	NA	NA	NA
cg18543993	DCAF4L2	138009	8	88886320	-4.68039	4.3e-06	0.00127072	3.74944	0.000212138	0.022125
cg22386646	KCND3	3752	1	112524496	-4.67909	4.33e-06	0.00127563	-1.18234	0.237993	0.970731
cg09607229	ZNF167	55888	3	44619924	-4.67905	4.33e-06	0.00127321	0.842983	0.399901	1.00394
cg05906530		0	4	139481751	-4.67889	4.33e-06	0.00127157	NA	NA	NA
cg15213782		0	X	27882132	-4.6777	4.35e-06	0.00127319	NA	NA	NA
cg14240735		0	16	18479404	-4.67636	4.38e-06	0.00127833	NA	NA	NA
cg26910047	NFATC1	4772	18	77234438	-4.6745	4.42e-06	0.00128659	-1.28061	0.201305	0.94741
cg20513080	NFATC1	4772	18	77215345	-4.67411	4.43e-06	0.00128621	-1.28061	0.201305	0.94741
cg14095100	TLE1	7088	9	84303413	-4.67069	4.5e-06	0.00130375	1.53252	0.126434	0.882143
cg11384084		0	12	132045365	-4.67009	4.51e-06	0.0013046	NA	NA	NA
cg08448668	KIF26B	55083	1	245852157	-4.66999	4.51e-06	0.00130254	-0.39633	0.69214	1.01148
cg08117431	ZNRF4	148066	19	5455497	-4.66974	4.52e-06	0.00130143	4.63103	5.4001e-06	0.000890972
cg19504661		0	2	239542427	-4.66854	4.54e-06	0.00130587	NA	NA	NA
cg03403525	ANKRD11	29123	16	89348167	-4.66695	4.57e-06	0.00131272	-3.93112	0.000104753	0.0121882
cg14082959		0	9	11618283	-4.66643	4.58e-06	0.00131316	NA	NA	NA
cg11734164		0	3	87101920	-4.666	4.59e-06	0.00131308	NA	NA	NA
cg01275934	SNX8	29886	7	2296365	-4.66567	4.6e-06	0.00131244	-2.57031	0.0106369	0.38648
cg04819760		0	10	22765645	-4.66533	4.61e-06	0.00131181	NA	NA	NA
cg06297554	DIP2C	22982	10	395173	-4.66382	4.64e-06	0.00131821	-3.06797	0.00234923	0.151563
cg24366105	SNX8	29886	7	2296929	-4.66289	4.66e-06	0.00132114	-2.57031	0.0106369	0.38648
cg12089570	ZNF177	7730	19	9473715	-4.66232	4.67e-06	0.00132195	0.562576	0.574138	1.0118
cg05360371	GLI2	2736	2	121746437	-4.65462	4.84e-06	0.00135808	0.271295	0.786348	1.00224
cg10269358	UNC13A	23025	19	17728585	-4.65247	4.88e-06	0.00136869	2.12338	0.0345297	0.627299
cg01215328		0	16	34208792	-4.64909	4.96e-06	0.00138434	NA	NA	NA
cg14816087		0	6	27259043	-4.64756	4.99e-06	0.00139126	NA	NA	NA
cg27329091		0	2	213698049	-4.64623	5.02e-06	0.00139693	NA	NA	NA
cg03198317	CASR	846	3	121949109	-4.64365	5.08e-06	0.00141059	1.54538	0.123294	0.882573
cg09413176		0	7	61821762	-4.6434	5.09e-06	0.00140941	NA	NA	NA
cg16185213		0	4	137733633	-4.642	5.12e-06	0.00141563	NA	NA	NA
cg21331417	NXN	64359	17	744811	-4.64139	5.13e-06	0.00141678	-1.58734	0.113476	0.868833
cg12720152	TTC7B	145567	14	91087476	-4.63876	5.2e-06	0.00143096	-1.19721	0.232159	0.970334
cg10522818	OTOP1	133060	4	4228239	-4.6372	5.23e-06	0.00143831	1.73422	0.0838927	0.818157
cg09770376		0	22	49637888	-4.63603	5.26e-06	0.00144313	NA	NA	NA
cg24130055		0	10	3500429	-4.63581	5.27e-06	0.00144179	NA	NA	NA
cg13465890		0	3	170372073	-4.63558	5.27e-06	0.00144052	NA	NA	NA
cg11844358	NFATC1	4772	18	77211065	-4.63556	5.27e-06	0.00143787	-1.28061	0.201305	0.94741
cg06170110	RBMXL3;LRCH2	139804	X	114426240	-4.63412	5.31e-06	0.00144178	-0.153147	0.878384	0.995776
cg19830270	ZNF208	7757	19	22193349	-4.63231	5.35e-06	0.00145079	3.58772	0.000388643	0.0370758
cg03425506		0	7	16566464	-4.63201	5.36e-06	0.00145001	NA	NA	NA
cg14451382		0	5	1876397	-4.63082	5.39e-06	0.00145231	NA	NA	NA
cg15702661	NFATC1	4772	18	77180840	-4.63024	5.4e-06	0.00145333	-1.28061	0.201305	0.94741
cg09471587	LOC407835	407835	7	128766655	-4.62894	5.43e-06	0.00145916	0.630392	0.528912	1.01058
cg15987088	GHSR	2693	3	172166234	-4.62837	5.45e-06	0.00146018	1.20753	0.228166	0.968936
cg03065175		0	4	155661758	-4.62757	5.46e-06	0.00146269	NA	NA	NA
cg25683963	OBSL1	23363	2	220420917	-4.62523	5.52e-06	0.00147543	-0.125966	0.899842	0.994833
cg23345930	SLC12A7	10723	5	1087702	-4.62497	5.53e-06	0.0014744	-0.527101	0.598508	1.01306
cg05869732	PTPRN2	5799	7	158319148	-4.62471	5.54e-06	0.00147333	0.197306	0.84372	0.998721
cg09017434	2018-03-11	0	5	16179660	-4.62375	5.56e-06	0.00147699	-0.292169	0.770357	1.00333
cg12872560	FAM170B	170370	10	50340047	-4.61406	5.81e-06	0.00154002	-0.715283	0.474983	1.00377
cg12616877	NXN	64359	17	710582	-4.60993	5.92e-06	0.00156601	-1.58734	0.113476	0.868833
cg13661012	TPO	7173	2	1516352	-4.60964	5.92e-06	0.00156508	-0.466694	0.641053	1.01469
cg00318519	VIT	5212	2	37035707	-4.60429	6.07e-06	0.00160025	-0.18658	0.852114	0.997802
cg03533632	EXD3	54932	9	140217142	-4.60293	6.11e-06	0.00160707	0.59616	0.551512	1.00986
cg09265586	ADARB2	105	10	1595595	-4.60003	6.19e-06	0.00162513	-1.16101	0.246547	0.973279
cg14568830		0	10	23463243	-4.59965	6.2e-06	0.00162494	NA	NA	NA
cg18246056	CLDN18	51208	3	137729045	-4.59847	6.23e-06	0.00163052	-1.05113	0.294032	0.982172
cg00469395		0	16	89315104	-4.59461	6.34e-06	0.00165597	NA	NA	NA
cg05684838		0	18	77316060	-4.59337	6.37e-06	0.00166219	NA	NA	NA
cg16551481	TFDP1	7027	13	114292663	-4.59274	6.39e-06	0.00166384	-6.85868	3.89174e-11	1.78038e-08
cg19651199		0	18	76601952	-4.58927	6.49e-06	0.00168683	NA	NA	NA
cg15806103	OOEP	441161	6	74079722	-4.58872	6.51e-06	0.00168788	-0.0365362	0.970879	0.9949
cg16057532	KCND3	3752	1	112524901	-4.58743	6.55e-06	0.00169464	-1.18234	0.237993	0.970731
cg12615165	GATA6	2627	18	19756877	-4.58738	6.55e-06	0.00169189	-0.659668	0.509967	1.00965
cg13721404	NOL4	8715	18	31739202	-4.5868	6.56e-06	0.00169327	-0.180461	0.856911	0.998192
cg08122114	NPTX1	4884	17	78444702	-4.5863	6.58e-06	0.00169399	1.00475	0.315817	0.988507
cg08765199	CPA1	1357	7	130021519	-4.58593	6.59e-06	0.00169368	-0.128656	0.897715	0.994612
cg12429610	INPP5D	3635	2	234113122	-4.58539	6.61e-06	0.00169472	-1.00092	0.31766	0.989809
cg21352158		0	8	832917	-4.58358	6.66e-06	0.00170548	NA	NA	NA
cg15885953	ADARB1	104	21	46520883	-4.57933	6.79e-06	0.00173514	0.394663	0.693369	1.01114
cg07433411	RIMBP2	23504	12	130953785	-4.57916	6.79e-06	0.00173335	-0.787561	0.431567	1.00498
cg14341834	RYR1	6261	19	38976465	-4.57892	6.8e-06	0.00173204	-0.368053	0.71309	1.0114
cg06490951	CETN1	1068	18	580435	-4.57758	6.84e-06	0.00173626	-0.138187	0.890184	0.995142
cg03729566	C7orf50	84310	7	1059678	-4.57611	6.89e-06	0.0017446	0.00223213	0.99822	0.999313
cg17760318	PCDHGA2;PCDHGA1	56113	5	140719225	-4.57523	6.91e-06	0.00174837	0.242406	0.808629	1.00085
cg17007640	C14orf23	387978	14	29243504	-4.56819	7.13e-06	0.00180107	1.78739	0.0748707	0.792778
cg11894257	HDGFL1	154150	6	22569881	-4.56722	7.16e-06	0.00180564	-0.307363	0.758778	1.00596
cg22853963		0	13	112200308	-4.56651	7.19e-06	0.00180823	NA	NA	NA
cg14471124		0	19	360726	-4.56196	7.33e-06	0.00183879	NA	NA	NA
cg16962838	BEND7	222389	10	13514100	-4.56189	7.34e-06	0.00183616	-1.48486	0.138618	0.896608
cg24748945	MAP2K2	5605	19	4123852	-4.56022	7.39e-06	0.00184661	-0.467289	0.640628	1.01473
cg20009650		0	4	132654638	-4.55708	7.5e-06	0.00186934	NA	NA	NA
cg14512089	LY9	4063	1	160771850	-4.55578	7.54e-06	0.00187692	-1.32229	0.187066	0.935981
cg26694724	MAD1L1	8379	7	1992028	-4.55559	7.55e-06	0.00187524	-0.0907625	0.927741	0.995495
cg04322111	HLA-DQB2	3120	6	32729764	-4.55433	7.59e-06	0.00188253	-1.44186	0.150372	0.907328
cg09391371		0	2	242790370	-4.5524	7.65e-06	0.00189543	NA	NA	NA
cg26807831	MAML3	55534	4	140781432	-4.55002	7.74e-06	0.00191233	0.569367	0.569528	1.01165
cg22744079	DCHS2	54798	4	155410860	-4.54904	7.77e-06	0.00191741	0.0173562	0.986164	0.996961
cg04720116	DIP2C	22982	10	679221	-4.54839	7.79e-06	0.00191963	-3.06797	0.00234923	0.151563
cg14887886	LRP5L	91355	22	25756047	-4.54567	7.89e-06	0.00193625	-0.94982	0.342958	0.993439
cg00869546	SNTG2	54221	2	1266660	-4.54208	8.01e-06	0.00196066	-0.177798	0.859	0.997106
cg17527589	ADAM3A	1587	8	39380435	-4.5403	8.08e-06	0.00197285	-0.0809785	0.935512	0.992198
cg15561613	KIF26B	55083	1	245851610	-4.53829	8.15e-06	0.0019837	-0.39633	0.69214	1.01148
cg02514721	GABRB1	2560	4	47427904	-4.53785	8.17e-06	0.00198418	0.495351	0.62071	1.01505
cg01777861		0	4	56023843	-4.53641	8.22e-06	0.00199356	NA	NA	NA
cg16046227	AATK	9625	17	79133095	-4.53168	8.39e-06	0.00202893	0.18139	0.856183	0.998326
cg14576896	GJD2	57369	15	35046650	-4.52934	8.48e-06	0.00204665	-0.273226	0.784865	1.00245
cg24545908		0	18	68097886	-4.5282	8.52e-06	0.00205007	NA	NA	NA
cg25272069		0	4	188534693	-4.52817	8.52e-06	0.00204683	NA	NA	NA
cg11931776	WNT7A	7476	3	13896256	-4.52451	8.66e-06	0.00207337	-1.75059	0.0810256	0.809813
cg05561555	LOC116437	0	12	131648301	-4.52087	8.8e-06	0.00210356	NA	NA	NA
cg21985132	SFRS6	6431	20	42086626	-4.52073	8.81e-06	0.00210134	1.09713	0.273454	0.978727
cg27222884	TUBB3	10381	16	90001282	-4.51889	8.88e-06	0.00211493	0.352871	0.72443	1.01061
cg26117778	LOC100133469	0	14	106938335	-4.51794	8.92e-06	0.0021203	NA	NA	NA
cg18384106		0	16	89315320	-4.51413	9.07e-06	0.0021528	NA	NA	NA
cg03242265		0	1	147782472	-4.51379	9.08e-06	0.0021524	NA	NA	NA
cg14099218	ADARB2	105	10	1741975	-4.51131	9.18e-06	0.00217252	-1.16101	0.246547	0.973279
cg02527886	CARD11	84433	7	2968316	-4.51042	9.22e-06	0.00217747	-1.4556	0.146534	0.902015
cg01445793	CAMKK1	84254	17	3771578	-4.50774	9.33e-06	0.00219981	-0.0417084	0.966759	0.994627
cg00896284		0	6	164758333	-4.5069	9.37e-06	0.0022043	NA	NA	NA
cg20821082	PRR23B	389151	3	138738869	-4.50572	9.41e-06	0.00221221	-0.264809	0.791336	1.00137
cg05645557		0	17	16290151	-4.50399	9.49e-06	0.00222547	NA	NA	NA
cg02851312	PTPRN2	5799	7	157666398	-4.5033	9.52e-06	0.0022286	0.197306	0.84372	0.998721
cg23725210	MYT1L	23040	2	1846853	-4.50316	9.52e-06	0.00222625	-0.0493466	0.960675	0.993498
cg07088555		0	16	89315186	-4.50284	9.54e-06	0.00222579	NA	NA	NA
cg05077122	SCARA5	286133	8	27737078	-4.49841	9.72e-06	0.002266	1.05315	0.29311	0.982515
cg17613214	WNT7A	7476	3	13860693	-4.49581	9.84e-06	0.00228835	-1.75059	0.0810256	0.809813
cg02111786	NRXN3	9369	14	80328189	-4.4925	9.98e-06	0.0023182	0.376953	0.706472	1.012
cg21820127	KCNN3	3782	1	154744644	-4.49147	1e-05	0.00232503	0.256547	0.797702	1.00168
cg09975620	PDX1	3651	13	28498384	-4.48805	1.02e-05	0.00235649	-0.982986	0.326396	0.991103
cg08182407	SALL3	27164	18	76754961	-4.48758	1.02e-05	0.00235747	-1.00805	0.314232	0.989855
cg00165619	EPHA8	2046	1	22903087	-4.48485	1.03e-05	0.0023783	0.565964	0.571836	1.01129
cg02699671	NXN	64359	17	850251	-4.4807	1.05e-05	0.00241431	-1.58734	0.113476	0.868833
cg07919028	FGF6	2251	12	4554480	-4.4792	1.06e-05	0.00242629	-0.178986	0.858068	0.997404
cg06381725	A4GALT	53947	22	43089529	-4.47808	1.06e-05	0.00243436	-2.59008	0.0100576	0.379121
cg04313385	NTF3	4908	12	5603989	-4.47289	1.09e-05	0.00247854	-0.504891	0.614001	1.01555
cg06569139	RGS22	26166	8	101117949	-4.4718	1.09e-05	0.00248652	1.05216	0.293561	0.982391
cg02438781		0	19	22469533	-4.47034	1.1e-05	0.00249852	NA	NA	NA
cg26881139	MAD1L1	8379	7	1913830	-4.46997	1.1e-05	0.00249851	-0.0907625	0.927741	0.995495
cg03432598	NFATC1	4772	18	77235051	-4.46834	1.11e-05	0.00251249	-1.28061	0.201305	0.94741
cg12334079		0	1	213562740	-4.46796	1.11e-05	0.00251264	NA	NA	NA
cg21546837		0	8	314072	-4.4679	1.11e-05	0.00250931	NA	NA	NA
cg25403721		0	12	114885372	-4.46599	1.12e-05	0.00252649	NA	NA	NA
cg23500204	CTDP1	9150	18	77496331	-4.4644	1.13e-05	0.00254012	0.804807	0.42156	1.00851
cg23999932		0	4	54976184	-4.46158	1.14e-05	0.00256769	NA	NA	NA
cg07400057	RBMXL2	27288	11	7111072	-4.46027	1.15e-05	0.00257437	-1.12042	0.263417	0.976488
cg20856239	CUL4A	8451	13	113917468	-4.45841	1.16e-05	0.00258723	-0.937175	0.349412	0.994109
cg01307684	ANTXR2	118429	4	80886143	-4.45645	1.17e-05	0.00260549	-0.792558	0.428654	1.00669
cg13061237		0	15	89285013	-4.45584	1.17e-05	0.00260829	NA	NA	NA
cg16869622	FBRSL1	57666	12	133102529	-4.45504	1.18e-05	0.00261335	0.599172	0.549504	1.01013
cg19134568	POU4F2	5458	4	147561339	-4.45332	1.19e-05	0.00262907	-0.302389	0.762562	1.00488
cg24005667	COL6A4P2	646300	3	129983089	-4.45222	1.19e-05	0.00263762	1.63071	0.103987	0.84606
cg02173128	CHD5	26038	1	6202177	-4.44727	1.22e-05	0.00269115	1.10024	0.2721	0.978227
cg06429195	DAZL	1618	3	16646582	-4.44665	1.22e-05	0.00269424	-0.106896	0.914942	0.993787
cg03346706	GNA15	2769	19	3162988	-4.44566	1.23e-05	0.00270181	-1.69574	0.0909596	0.832617
cg11797222	MAP2K1	5604	15	66679417	-4.44335	1.24e-05	0.00272491	0.175021	0.86118	0.996418
cg06674527	LOC390594	0	15	65369928	-4.44294	1.24e-05	0.00272569	NA	NA	NA
cg02383323	MYT1L	23040	2	1895701	-4.44179	1.25e-05	0.00273095	-0.0493466	0.960675	0.993498
cg06776741	OLFML2B	25903	1	161953756	-4.44072	1.25e-05	0.00273955	0.733143	0.464036	1.00275
cg06768088	SCNN1G	6340	16	23197660	-4.44055	1.25e-05	0.00273731	0.545509	0.585803	1.01112
cg23871640	ALX3	257	1	110611807	-4.4387	1.26e-05	0.00275525	1.16501	0.244929	0.972423
cg18468354		0	14	36993517	-4.4387	1.26e-05	0.00275109	NA	NA	NA
cg17314244		0	8	49043711	-4.43726	1.27e-05	0.00276426	NA	NA	NA
cg03285823	NFATC1	4772	18	77271159	-4.4324	1.3e-05	0.00281486	-1.28061	0.201305	0.94741
cg17753476	ITIH5	80760	10	7621949	-4.43039	1.31e-05	0.00283525	-0.680265	0.496854	1.00818
cg11961642	DNAH10	196385	12	124272362	-4.42993	1.31e-05	0.00283665	0.985011	0.325402	0.992126
cg04510807	MAD1L1	8379	7	2054241	-4.42697	1.33e-05	0.00286909	-0.0907625	0.927741	0.995495
cg25604819		0	3	82857026	-4.42601	1.34e-05	0.00287677	NA	NA	NA
cg25953239	HOXD10	3236	2	176982342	-4.42594	1.34e-05	0.00287333	-2.03216	0.0430067	0.673683
cg16770309		0	15	102292955	-4.42518	1.34e-05	0.00287849	NA	NA	NA
cg11612727	PCGF6	84108	10	105110686	-4.42464	1.34e-05	0.00288091	-0.659041	0.510368	1.00955
cg24506706	SDK1	221935	7	4169485	-4.42345	1.35e-05	0.00289152	-1.45431	0.146893	0.902016
cg15965134		0	3	137480671	-4.42319	1.35e-05	0.00289045	NA	NA	NA
cg03879918	EBF3	253738	10	131686425	-4.42199	1.36e-05	0.00290119	0.910636	0.363208	0.996324
cg19777991	FHOD3	80206	18	34325636	-4.42182	1.36e-05	0.00289904	-0.989093	0.323404	0.992348
cg03559389	DIP2C	22982	10	679322	-4.4216	1.36e-05	0.00289746	-3.06797	0.00234923	0.151563
cg13438893		0	13	79170303	-4.42103	1.36e-05	0.00290029	NA	NA	NA
cg00843634	SOX7	83595	8	10584169	-4.41995	1.37e-05	0.00290968	-0.371332	0.710649	1.01143
cg10332422	TFDP1	7027	13	114292552	-4.41918	1.38e-05	0.00291501	-6.85868	3.89174e-11	1.78038e-08
cg12903174	RGS7	6000	1	240986655	-4.41837	1.38e-05	0.002921	0.0575675	0.954131	0.993313
cg05678518	TRPC7	57113	5	135693041	-4.41758	1.39e-05	0.00292237	-0.215211	0.829747	0.99946
cg21724451	MGAT5B	146664	17	74878346	-4.41741	1.39e-05	0.00292024	-1.04147	0.298485	0.986085
cg08436798		0	11	49124090	-4.41687	1.39e-05	0.00292268	NA	NA	NA
cg00693060		0	19	360072	-4.41669	1.39e-05	0.0029207	NA	NA	NA
cg04606653	CBFA2T3	863	16	88975851	-4.41611	1.39e-05	0.00292373	0.303929	0.76139	1.00499
cg25370728	PDE9A	5152	21	44106476	-4.41526	1.4e-05	0.0029302	-0.90658	0.365347	0.996892
cg24734735	LOC154822	0	7	158817612	-4.41419	1.41e-05	0.00293959	NA	NA	NA
cg10732385	APOA5	116519	11	116661100	-4.41401	1.41e-05	0.00293764	0.639073	0.523257	1.00936
cg00437395	LOC145814	0	15	99512799	-4.41358	1.41e-05	0.00293878	NA	NA	NA
cg04447708	OBSL1	23363	2	220432872	-4.41112	1.42e-05	0.00296598	-0.125966	0.899842	0.994833
cg23291301	POU3F3	5455	2	105472469	-4.40812	1.44e-05	0.00299611	2.16652	0.0310482	0.609131
cg20267823	FLJ40434	0	1	53904141	-4.40727	1.45e-05	0.00299847	NA	NA	NA
cg03097582	SBK1	388228	16	28332368	-4.40699	1.45e-05	0.00299771	0.943207	0.346324	0.991489
cg00808170	PCDHGA4;PCDHGA11;PCDHGA9;PCDHGA1;PCDHGB1;PCDHGB8P;PCDHGB6;PCDHGB3;PCDHGB7;PCDHGA6;PCDHGA8;PCDHGA10;PCDHGA5;PCDHGB4;PCDHGA3;PCDHGA2;PCDHGB2;PCDHGA7;PCDHGB5	56111	5	140807787	-4.40528	1.46e-05	0.00301129	-0.378441	0.705367	1.01171
cg21867110		0	19	22700397	-4.40293	1.48e-05	0.00303774	NA	NA	NA
cg18469917		0	18	12433231	-4.40193	1.48e-05	0.00304663	NA	NA	NA
cg02213822		0	9	128985576	-4.40186	1.48e-05	0.00304312	NA	NA	NA
cg12156646	FAT3	120114	11	92615932	-4.39889	1.5e-05	0.00307804	0.0421382	0.966416	0.994529
cg24774002	MIR1909;REXO1	100302210	19	1816355	-4.3974	1.51e-05	0.00309357	NA	NA	NA
cg14099121	CALHM1	255022	10	105215306	-4.39713	1.51e-05	0.0030927	-0.313298	0.754269	1.00594
cg17952467	UNC13A	23025	19	17758336	-4.38966	1.56e-05	0.00318976	2.12338	0.0345297	0.627299
cg21150921	KIAA0427	9811	18	46288073	-4.3889	1.57e-05	0.00319579	0.793765	0.427951	1.00787
cg13485703		0	17	21730179	-4.38763	1.58e-05	0.00320874	NA	NA	NA
cg06233658	MAD1L1	8379	7	1865544	-4.38688	1.58e-05	0.00321456	-0.0907625	0.927741	0.995495
cg14780132	DCHS2	54798	4	155254602	-4.38497	1.6e-05	0.00323666	0.0173562	0.986164	0.996961
cg05312960	TOP1P2;PIWIL3	7152	22	25159879	-4.38447	1.6e-05	0.00323904	-1.40305	0.161623	0.919793
cg17997207	FAM184B	27146	4	17711022	-4.38158	1.62e-05	0.00327041	0.290514	0.771621	1.00342
cg22478179		0	16	88311258	-4.38131	1.62e-05	0.00326961	NA	NA	NA
cg25363527	PTPRN2	5799	7	158250310	-4.38065	1.63e-05	0.00327423	0.197306	0.84372	0.998721
cg19922758		0	6	170778275	-4.38002	1.63e-05	0.00327861	NA	NA	NA
cg11671688	GPR6	2830	6	110301075	-4.37968	1.63e-05	0.00327875	2.88028	0.00425552	0.220772
cg21300403	BOLL	66037	2	198650112	-4.37949	1.63e-05	0.00327674	1.28798	0.198733	0.945696
cg12157281		0	2	8168246	-4.37617	1.66e-05	0.00331947	NA	NA	NA
cg05622569		0	16	86006196	-4.37033	1.7e-05	0.0033945	NA	NA	NA
cg07703190		0	21	47165787	-4.36746	1.72e-05	0.003432	NA	NA	NA
cg24599434	GHSR	2693	3	172166242	-4.36391	1.75e-05	0.00348	1.20753	0.228166	0.968936
cg19058585	FBLN7	129804	2	112944983	-4.36367	1.75e-05	0.0034787	-2.13906	0.0332275	0.622173
cg02629737	FGF13	2258	X	138285540	-4.36016	1.78e-05	0.0035218	0.761459	0.446973	1.00325
cg24365088	ATP2B2	491	3	10400512	-4.35971	1.78e-05	0.00352377	0.267465	0.789293	1.00212
cg09287629		0	2	203036208	-4.35918	1.78e-05	0.00352687	NA	NA	NA
cg08671671	HDGFL1	154150	6	22569661	-4.35541	1.81e-05	0.00357952	-0.307363	0.758778	1.00596
cg16576575		0	22	49798591	-4.35536	1.81e-05	0.00357533	NA	NA	NA
cg21594400	DOCK4	9732	7	111368367	-4.355	1.82e-05	0.00357592	0.395823	0.692513	1.01136
cg03060468	SLC25A2	83884	5	140683196	-4.35355	1.83e-05	0.00359327	-0.242728	0.80838	1.00091
cg17711541	HIST1H2AC;HIST1H2BC	8334	6	26124704	-4.35235	1.84e-05	0.00360693	-1.41851	0.157067	0.91508
cg16590151	SYNCRIP	10492	6	86352636	-4.35162	1.84e-05	0.00361324	1.79781	0.0731992	0.787507
cg19628225	HTR6	3362	1	20005822	-4.34909	1.86e-05	0.00364774	-1.22809	0.220362	0.964065
cg24459397	OPRL1	4987	20	62719015	-4.34369	1.91e-05	0.00372818	1.31544	0.189353	0.937405
cg13760252	ZNRF4	148066	19	5455500	-4.3434	1.91e-05	0.0037277	4.63103	5.4001e-06	0.000890972
cg15261897		0	10	37969553	-4.3422	1.92e-05	0.00374178	NA	NA	NA
cg04221388	ODZ2	57451	5	167689716	-4.3419	1.92e-05	0.00374136	-1.01328	0.311734	0.991294
cg09238868		0	X	20286779	-4.33975	1.94e-05	0.00376581	NA	NA	NA
cg21781009		0	5	1729775	-4.33746	1.96e-05	0.00379765	NA	NA	NA
cg06668555	FAM135B	51059	8	139509129	-4.33657	1.97e-05	0.00380703	2.29239	0.022566	0.537552
cg08836375		0	6	164393796	-4.33398	1.99e-05	0.00383907	NA	NA	NA
cg07503593	CIITA	4261	16	11001032	-4.3316	2.01e-05	0.00387309	-0.875996	0.381724	0.997756
cg13214937		0	X	64254615	-4.33126	2.01e-05	0.0038735	NA	NA	NA
cg09016348		0	6	4255113	-4.33079	2.01e-05	0.00387606	NA	NA	NA
cg16706038	C21orf56	84221	21	47601047	-4.33049	2.02e-05	0.00387588	-1.25835	0.20923	0.953927
cg19198652	GUSB	2990	7	65447322	-4.32997	2.02e-05	0.00387918	-0.404202	0.686348	1.0122
cg24860819	CHRNB2	1141	1	154544088	-4.32953	2.03e-05	0.00388131	0.641138	0.521916	1.00967
cg18407955	PTPRN2	5799	7	158110685	-4.32899	2.03e-05	0.00388496	0.197306	0.84372	0.998721
cg27109650		0	12	52473422	-4.32836	2.04e-05	0.00389029	NA	NA	NA
cg09457121	OBSL1	23363	2	220420834	-4.32623	2.05e-05	0.0039207	-0.125966	0.899842	0.994833
cg12105899		0	X	125715154	-4.326	2.06e-05	0.00391928	NA	NA	NA
cg09511963	LOC494141	494141	11	18230625	-4.3258	2.06e-05	0.00391741	0.561802	0.574665	1.01123
cg04008601	C12orf42	374470	12	103696126	-4.32516	2.06e-05	0.00392281	0.48138	0.630593	1.01635
cg20950296		0	X	45241143	-4.32384	2.08e-05	0.00393981	NA	NA	NA
cg02665031		0	22	17178604	-4.3234	2.08e-05	0.0039419	NA	NA	NA
cg26990406		0	7	178829	-4.32206	2.09e-05	0.00395406	NA	NA	NA
cg07001909	NRXN3	9369	14	80328262	-4.31951	2.11e-05	0.00399203	0.376953	0.706472	1.012
cg05366189	CACNA1A	773	19	13397419	-4.31914	2.12e-05	0.00399312	-1.57422	0.116478	0.87845
cg14404807	LOC100133469	0	14	106938294	-4.31544	2.15e-05	0.00405121	NA	NA	NA
cg17156227	SLC4A11	83959	20	3209945	-4.31503	2.15e-05	0.0040529	-0.606966	0.544326	1.01002
cg10071643	OLIG3	167826	6	137814356	-4.31431	2.16e-05	0.00406004	-0.389847	0.696923	1.0112
cg01943983	ODZ4	26011	11	78387190	-4.31336	2.17e-05	0.00407122	-0.711438	0.477358	1.00384
cg01242498	DLK1	8788	14	101200717	-4.31324	2.17e-05	0.00406791	3.62382	0.000340144	0.0330761
cg17312004		0	11	43569076	-4.31267	2.18e-05	0.00407248	NA	NA	NA
cg06719973	FAM20C	56975	7	207666	-4.31222	2.18e-05	0.00406958	-1.25178	0.211611	0.955693
cg05354971		0	2	91936984	-4.31135	2.19e-05	0.00407932	NA	NA	NA
cg00230586		0	19	16013833	-4.3111	2.19e-05	0.0040784	NA	NA	NA
cg07621042	RBMXL3;LRCH2	139804	X	114424768	-4.31051	2.2e-05	0.00407806	-0.153147	0.878384	0.995776
cg15814157	SBK2	646643	19	56041511	-4.31036	2.2e-05	0.00407529	1.10273	0.271014	0.97852
cg19110755	LOC145814	0	15	99512842	-4.30991	2.2e-05	0.00407773	NA	NA	NA
cg16134678	PABPC3	5042	13	25670187	-4.30634	2.24e-05	0.00413494	1.43248	0.153034	0.911634
cg04760426	SLC45A1	50651	1	8395517	-4.30557	2.24e-05	0.00414312	0.249766	0.802937	1.00145
cg00714170	MUC4	4585	3	195477854	-4.30546	2.24e-05	0.0041398	-1.17003	0.242907	0.974
cg13532854		0	7	155898355	-4.30269	2.27e-05	0.00417794	NA	NA	NA
cg09921371	PXDN	7837	2	1670073	-4.30217	2.28e-05	0.00417657	-0.274419	0.783949	1.00242
cg20278383	CLDN10	9071	13	96086098	-4.2993	2.3e-05	0.0042224	-0.615141	0.538922	1.01024
cg18199434	EBF3	253738	10	131666017	-4.29914	2.31e-05	0.0042199	0.910636	0.363208	0.996324
cg03099683		0	4	132661931	-4.29563	2.34e-05	0.00427783	NA	NA	NA
cg02956460		0	1	165910759	-4.29299	2.37e-05	0.00432049	NA	NA	NA
cg18242103	PTGDR	5729	14	52734253	-4.29184	2.38e-05	0.00433614	-0.771217	0.441177	1.00378
cg14885748		0	12	127211262	-4.29129	2.38e-05	0.00434074	NA	NA	NA
cg23512657	MMP17	4326	12	132334767	-4.29091	2.39e-05	0.00434207	-1.59958	0.11073	0.86224
cg15062725	ZFR2	23217	19	3831364	-4.28999	2.4e-05	0.00435364	-0.570822	0.568542	1.01178
cg19107469		0	20	55200445	-4.2899	2.4e-05	0.00434978	NA	NA	NA
cg01758512	FUT9	10690	6	96463902	-4.28909	2.41e-05	0.00435923	3.21334	0.00145289	0.106734
cg03747002	GUCY2D	3000	17	7907439	-4.28897	2.41e-05	0.00435579	0.204957	0.837743	0.999107
cg19248041		0	X	68003574	-4.28823	2.42e-05	0.00436392	NA	NA	NA
cg07873926		0	18	77395518	-4.2878	2.42e-05	0.00436635	NA	NA	NA
cg06262746	GOLGA3	2802	12	133349857	-4.28597	2.44e-05	0.00439482	1.90745	0.0574046	0.732719
cg14595922	PCDHA6;PCDHA2;PCDHA1;PCDHA7;PCDHA5;PCDHA9;PCDHA3;PCDHA4;PCDHA8	56142	5	140230251	-4.28575	2.44e-05	0.00439338	0.115675	0.907986	0.995797
cg15084903	THEG	51298	19	376055	-4.2853	2.45e-05	0.00439627	-0.888332	0.375065	0.997447
cg00275626	COL4A2	1284	13	111109140	-4.28435	2.46e-05	0.0044085	0.756039	0.450211	1.00302
cg20880080	GATA6	2627	18	19780644	-4.28337	2.47e-05	0.00442131	-0.659668	0.509967	1.00965
cg23141851		0	3	14615941	-4.2826	2.47e-05	0.0044301	NA	NA	NA
cg07820064	SPEG	10290	2	220299584	-4.28192	2.48e-05	0.00443743	-1.82694	0.0686891	0.77329
cg27230040		0	14	70701049	-4.28186	2.48e-05	0.00443293	NA	NA	NA
cg02180633	MFSD7	84179	4	680114	-4.2808	2.49e-05	0.00444731	-0.825452	0.409762	1.0055
cg14445366		0	17	70112050	-4.2799	2.5e-05	0.00445869	NA	NA	NA
cg14517001		0	17	80179931	-4.27982	2.5e-05	0.00445461	NA	NA	NA
cg04770020	TPO	7173	2	1544321	-4.27981	2.5e-05	0.00444937	-0.466694	0.641053	1.01469
cg03985630	ZNF618	114991	9	116811954	-4.27974	2.5e-05	0.00444498	0.0252401	0.97988	0.996313
cg08972582		0	11	48901914	-4.27922	2.51e-05	0.00444925	NA	NA	NA
cg12228319	BRUNOL4	56853	18	34916814	-4.27829	2.52e-05	0.00446127	-0.748898	0.454498	1.00368
cg05661982	EIF3B	8662	7	2420084	-4.27786	2.52e-05	0.004464	-0.801845	0.423269	1.00888
cg14551938		0	8	49173274	-4.27776	2.52e-05	0.00446028	NA	NA	NA
cg11570508	PGBD5	79605	1	230492846	-4.27361	2.57e-05	0.00453379	-0.475837	0.634532	1.01562
cg23797887	LDHAL6A	160287	11	18477753	-4.27297	2.58e-05	0.00454042	0.752805	0.45215	1.00334
cg18630243	LOC91316	0	22	24059634	-4.27263	2.58e-05	0.00454132	NA	NA	NA
cg00885023		0	17	25309298	-4.27126	2.6e-05	0.00456203	NA	NA	NA
cg12212620		0	14	76600842	-4.27065	2.6e-05	0.00456819	NA	NA	NA
cg19732653	KIF26B	55083	1	245848798	-4.27023	2.61e-05	0.00457068	-0.39633	0.69214	1.01148
cg19928340		0	7	1809352	-4.26947	2.61e-05	0.00457986	NA	NA	NA
cg19925741	TUBA3C	7278	13	19751465	-4.26828	2.63e-05	0.00459723	5.39362	1.38994e-07	3.07452e-05
cg01264126	FNDC1	84624	6	159653488	-4.2653	2.66e-05	0.00464991	1.1452	0.253028	0.974217
cg05712931	NFATC1	4772	18	77219240	-4.26522	2.66e-05	0.0046457	-1.28061	0.201305	0.94741
cg13434308	TMTC1	83857	12	29936486	-4.2648	2.67e-05	0.00464838	-0.721519	0.471145	1.00303
cg01900413	ETS1	2113	11	128419356	-4.2625	2.69e-05	0.0046879	-0.906258	0.365517	0.996951
cg25144111	C6orf174	387104	6	127796312	-4.26117	2.71e-05	0.00470867	0.481282	0.630662	1.0163
cg18617005	PCDHGA4;PCDHGA6;PCDHGA9;PCDHGA1;PCDHGA8;PCDHGA5;PCDHGB1;PCDHGB6;PCDHGB4;PCDHGA3;PCDHGA2;PCDHGA7;PCDHGB2;PCDHGB5;PCDHGB3	56111	5	140787504	-4.26082	2.71e-05	0.00470988	-0.378441	0.705367	1.01171
cg22533762		0	2	213697049	-4.25984	2.72e-05	0.00472364	NA	NA	NA
cg21887373	DPP10	57628	2	115420260	-4.25971	2.73e-05	0.0047205	0.0336293	0.973195	0.995044
cg21161766		0	19	39756248	-4.25873	2.74e-05	0.0047342	NA	NA	NA
cg08056755	LOC146336	0	16	1116397	-4.25808	2.74e-05	0.00474152	NA	NA	NA
cg10903254		0	17	21953370	-4.25673	2.76e-05	0.00476283	NA	NA	NA
cg02289376	IGSF9B	22997	11	133790744	-4.25456	2.78e-05	0.00478922	0.954109	0.340786	0.992575
cg05371922		0	X	8751557	-4.2536	2.8e-05	0.00480285	NA	NA	NA
cg13795805	BCL11B	64919	14	99640604	-4.25278	2.81e-05	0.00481364	-0.399291	0.689959	1.01145
cg14750948	ZIC1	7545	3	147130477	-4.25278	2.81e-05	0.0048079	-0.543971	0.58686	1.01112
cg01559503	MUC2	4583	11	1096368	-4.25268	2.81e-05	0.00480421	-1.53569	0.125655	0.883447
cg08250787	SDK1	221935	7	4169604	-4.25264	2.81e-05	0.00479923	-1.45431	0.146893	0.902016
cg09465698	PCDHGA4;PCDHGA6;PCDHGB6;PCDHGA9;PCDHGA1;PCDHGA8;PCDHGA5;PCDHGB1;PCDHGB4;PCDHGA3;PCDHGA2;PCDHGA7;PCDHGB2;PCDHGB5;PCDHGB3	56111	5	140787623	-4.2522	2.81e-05	0.00480243	-0.378441	0.705367	1.01171
cg23904004		0	15	35414083	-4.2516	2.82e-05	0.00480879	NA	NA	NA
cg14149623		0	21	47053072	-4.25104	2.83e-05	0.00481431	NA	NA	NA
cg18064897	WWC3	55841	X	10085184	-4.24998	2.84e-05	0.0048302	-0.410451	0.681764	1.01308
cg14209618	LOC150185	0	22	19554409	-4.24937	2.85e-05	0.00483686	NA	NA	NA
cg20677019	TRIM42	287015	3	140401543	-4.24872	2.85e-05	0.00484426	-0.28593	0.775127	1.00254
cg02886208	SPON1	10418	11	14281011	-4.24519	2.9e-05	0.00491098	-0.521974	0.602069	1.01449
cg01132139	PRKRIR	5612	11	76091836	-4.24419	2.91e-05	0.00492597	-0.263122	0.792634	1.00144
cg17746023	COL18A1	80781	21	46918393	-4.24124	2.95e-05	0.00498149	-0.185094	0.853278	0.997888
cg00333020		0	10	2932299	-4.24072	2.95e-05	0.00498649	NA	NA	NA
cg21884231	SLC7A14	57709	3	170303721	-4.23917	2.97e-05	0.00500122	2.40421	0.0168056	0.475111
cg17725364	COL6A3	1293	2	238280514	-4.2376	2.99e-05	0.00502842	0.199596	0.84193	0.99954
cg10168419		0	8	43059945	-4.23737	2.99e-05	0.00502744	NA	NA	NA
cg09031522		0	13	112610918	-4.23696	3e-05	0.00503028	NA	NA	NA
cg14504269		0	3	138658941	-4.2366	3e-05	0.00503193	NA	NA	NA
cg00195144	DIP2C	22982	10	525946	-4.23408	3.04e-05	0.00507946	-3.06797	0.00234923	0.151563
cg20156659	LHCGR	3973	2	48982832	-4.23309	3.05e-05	0.00509461	6.77709	6.36793e-11	2.67042e-08
cg17162797	RASA3	22821	13	114836512	-4.23243	3.06e-05	0.00510287	-0.70202	0.483204	1.00573
cg09103658	NPTX1	4884	17	78442672	-4.23233	3.06e-05	0.00509902	1.00475	0.315817	0.988507
cg24089118	PTGDR	5729	14	52734251	-4.23219	3.06e-05	0.00509613	-0.771217	0.441177	1.00378
cg08951203	LOC255025	0	3	94657041	-4.23001	3.09e-05	0.00513699	NA	NA	NA
cg09032973	PCDHA1	56147	5	140165998	-4.22964	3.09e-05	0.00513892	-0.0378027	0.96987	0.994727
cg19610267	NUDT9P1	119369	10	92913472	-4.22961	3.09e-05	0.00513364	-0.482578	0.629743	1.0162
cg17269548	PPIA	5478	7	44836290	-4.22717	3.13e-05	0.00518043	-0.78541	0.432825	1.00477
cg13552315		0	22	17178751	-4.22681	3.13e-05	0.00518225	NA	NA	NA
cg12395012	GATA4	2626	8	11607386	-4.22671	3.13e-05	0.00517834	1.00328	0.316522	0.988408
cg21559154		0	2	139660194	-4.22374	3.17e-05	0.00522501	NA	NA	NA
cg14911395	SEMA3B	7869	3	50311213	-4.21909	3.23e-05	0.00530949	-0.748907	0.454492	1.00378
cg10125522	PCBP3	54039	21	47344376	-4.21764	3.25e-05	0.00533561	1.06975	0.285582	0.980301
cg22913204	MUC4	4585	3	195477968	-4.21723	3.26e-05	0.00533866	-1.17003	0.242907	0.974
cg10043804	VENTXP1	139538	X	26576171	-4.21522	3.29e-05	0.00537757	2.0557	0.0406652	0.665487
cg20241254	KIAA1161	57462	9	34372821	-4.2147	3.29e-05	0.00538321	-1.88666	0.0601583	0.749799
cg09168980	FAM48B1	170067	X	24380413	-4.21397	3.3e-05	0.00538739	2.26162	0.0244273	0.551849
cg24675735	MGAT5B	146664	17	74878351	-4.2139	3.3e-05	0.00538262	-1.04147	0.298485	0.986085
cg02952451	PCSK6	5046	15	101938761	-4.21384	3.3e-05	0.00537799	-0.0684564	0.945467	0.992765
cg13482208	PDZD4	57595	X	153070352	-4.21285	3.32e-05	0.00539413	-0.240507	0.810099	1.00083
cg24648119	PCDHA6;PCDHA2;PCDHA1;PCDHA9;PCDHA7;PCDHA5;PCDHA10;PCDHA3;PCDHA4;PCDHA8	56142	5	140242639	-4.2114	3.34e-05	0.00542063	0.115675	0.907986	0.995797
cg05499880	CHST12	55501	7	2473462	-4.21052	3.35e-05	0.00543452	-0.699942	0.484499	1.00531
cg10308414		0	9	128777758	-4.21036	3.35e-05	0.00543205	NA	NA	NA
cg13437581		0	18	44777799	-4.2103	3.35e-05	0.00542714	NA	NA	NA
cg07507057	PCDHA6;PCDHA2;PCDHA1;PCDHA7;PCDHA8;PCDHA5;PCDHA3;PCDHA4	56142	5	140223107	-4.20991	3.36e-05	0.00542991	0.115675	0.907986	0.995797
cg10292376	KRT72	140807	12	52995070	-4.20971	3.36e-05	0.00542823	-0.228062	0.819752	1.00156
cg11221635	MGAT5B	146664	17	74878301	-4.20758	3.39e-05	0.00546438	-1.04147	0.298485	0.986085
cg01119912	FAT2	2196	5	150911450	-4.20522	3.43e-05	0.00551243	-0.485052	0.627989	1.01639
cg03466779	SORCS2	57537	4	7666141	-4.2036	3.45e-05	0.00554354	-0.428551	0.668554	1.01519
cg25717351	NXN	64359	17	744675	-4.20289	3.46e-05	0.00555381	-1.58734	0.113476	0.868833
cg13786513		0	19	45648562	-4.20123	3.48e-05	0.00558618	NA	NA	NA
cg09081892	HDGFL1	154150	6	22569653	-4.19962	3.51e-05	0.00561741	-0.307363	0.758778	1.00596
cg14848469		0	12	132045286	-4.19842	3.52e-05	0.00563939	NA	NA	NA
cg22961513	SPON1	10418	11	14280813	-4.19826	3.53e-05	0.00563685	-0.521974	0.602069	1.01449
cg15087129	COL6A2	1292	21	47532333	-4.19719	3.54e-05	0.00565568	-0.0394091	0.96859	0.994884
cg15180637	DAZL	1618	3	16646058	-4.19718	3.54e-05	0.00564964	-0.106896	0.914942	0.993787
cg13209481	SFTA3	253970	14	36973483	-4.19624	3.56e-05	0.00566535	-0.324769	0.745579	1.00689
cg19824059	NRXN1	9378	2	51255324	-4.19528	3.57e-05	0.00568178	-0.845679	0.398397	1.00342
cg00954869	CDH4	1002	20	60503309	-4.19377	3.59e-05	0.00571141	-0.109093	0.913201	0.993451
cg02268750		0	19	22320975	-4.19348	3.6e-05	0.00571189	NA	NA	NA
cg08719296	FAM19A5	25817	22	49019316	-4.19178	3.62e-05	0.00574611	-0.374419	0.708353	1.0121
cg01190637	KCNH6	81033	17	61613061	-4.19133	3.63e-05	0.00575055	0.827058	0.408853	1.00535
cg08206906		0	19	22701260	-4.19114	3.63e-05	0.00574866	NA	NA	NA
cg11473001	NTM	50863	11	131780499	-4.19042	3.64e-05	0.00575949	-0.438121	0.66161	1.01676
cg06675478	SOX1	6656	13	112721786	-4.18957	3.66e-05	0.00577343	-0.413624	0.679441	1.01375
cg06010032	FAM135B	51059	8	139508813	-4.1885	3.67e-05	0.00579287	2.29239	0.022566	0.537552
cg21545862		0	5	174159294	-4.18741	3.69e-05	0.00581274	NA	NA	NA
cg01988616	ANKRD11	29123	16	89371601	-4.18733	3.69e-05	0.00580844	-3.93112	0.000104753	0.0121882
cg07489048	FOXG1	2290	14	29236898	-4.18622	3.71e-05	0.00582873	2.77809	0.00580787	0.271876
cg03704653	FAM9A	171482	X	8769344	-4.18537	3.72e-05	0.00583671	0.434838	0.663988	1.01545
cg03777288	GRIN2B	2904	12	13717033	-4.18528	3.72e-05	0.00583245	1.52355	0.128661	0.883594
cg25054580		0	4	54976019	-4.18425	3.74e-05	0.00585103	NA	NA	NA
cg17662941		0	7	63560973	-4.18422	3.74e-05	0.00584532	NA	NA	NA
cg07035659	MSX1	4487	4	4859975	-4.18398	3.74e-05	0.0058446	-1.22822	0.220314	0.964065
cg18975948	PDE9A	5152	21	44106233	-4.18235	3.77e-05	0.00587151	-0.90658	0.365347	0.996892
cg15881404	ARHGAP22	58504	10	49732637	-4.18042	3.8e-05	0.00591242	0.135469	0.892331	0.994669
cg15460739	STXBP2	6813	19	7712095	-4.18034	3.8e-05	0.00590804	0.401361	0.688436	1.01165
cg14308254	FAM83A	84985	8	124219699	-4.18005	3.81e-05	0.00590882	-1.15468	0.249128	0.974107
cg27532560		0	4	187881888	-4.17904	3.82e-05	0.00592722	NA	NA	NA
cg12424293	NFATC1	4772	18	77273440	-4.17723	3.85e-05	0.00596547	-1.28061	0.201305	0.94741
cg07790300	ZNF697	90874	1	120166625	-4.17649	3.86e-05	0.00597717	-0.0310237	0.975271	0.995297
cg07252200		0	10	125751941	-4.17625	3.87e-05	0.00597671	NA	NA	NA
cg23318063		0	14	58332751	-4.17595	3.87e-05	0.00597778	NA	NA	NA
cg01729827	CBLN4	140689	20	54579084	-4.17409	3.9e-05	0.00601765	0.852223	0.394761	1.00267
cg13641903	WT1	7490	11	32452608	-4.17084	3.95e-05	0.00607968	-0.222914	0.823752	1.00038
cg14002960	NOL4	8715	18	31739423	-4.17016	3.96e-05	0.0060901	-0.180461	0.856911	0.998192
cg03397031	OPRD1	4985	1	29189308	-4.16982	3.97e-05	0.00609217	-0.337098	0.736276	1.00861
cg27338841	LOC255025	0	3	94657048	-4.1695	3.98e-05	0.00609364	NA	NA	NA
cg05574272	RXFP3	51289	5	33938213	-4.16633	4.03e-05	0.00616789	-0.547858	0.584191	1.01189
cg23181580		0	11	22454301	-4.16618	4.03e-05	0.00616506	NA	NA	NA
cg05972386	GTF2A1L;STON1-GTF2A1L	11036	2	48844763	-4.16487	4.05e-05	0.00619193	-0.123033	0.902163	0.994776
cg10400362	AJAP1	55966	1	4832549	-4.16091	4.12e-05	0.00628779	-1.1465	0.25249	0.975502
cg01127428	SYCP3	50511	12	102133040	-4.16011	4.13e-05	0.00630193	1.88362	0.0605703	0.752605
cg10407177	BRUNOL4	56853	18	34916713	-4.15999	4.14e-05	0.00629814	-0.748898	0.454498	1.00368
cg16958184	MYLK4	340156	6	2685592	-4.15696	4.19e-05	0.00636426	0.138961	0.889573	0.995508
cg01782790		0	1	163393050	-4.15608	4.2e-05	0.00638071	NA	NA	NA
cg02548444		0	8	1137388	-4.1559	4.21e-05	0.00637863	NA	NA	NA
cg04218745		0	16	85878940	-4.1556	4.21e-05	0.0063796	NA	NA	NA
cg11184057		0	5	60039819	-4.15359	4.25e-05	0.00641937	NA	NA	NA
cg01690182	GABRB3	2562	15	27018874	-4.15322	4.25e-05	0.00642244	1.25039	0.212119	0.955413
cg19637686	GALNT9	50614	12	132824369	-4.15255	4.27e-05	0.00643333	0.442782	0.658238	1.01748
cg15834388	NECAB1	64168	8	91803692	-4.15116	4.29e-05	0.00646372	0.744693	0.457033	1.00389
cg13965922	DSCAML1	57453	11	117299194	-4.15092	4.29e-05	0.00646309	0.701804	0.483338	1.00559
cg13221404	TSKS	60385	19	50249893	-4.15021	4.31e-05	0.00647536	0.657219	0.511537	1.00939
cg22541735	HOXD9	3235	2	176988203	-4.14996	4.31e-05	0.00647523	-1.31681	0.188895	0.937212
cg14666411	MYT1	4661	20	62818091	-4.14981	4.31e-05	0.00647252	-0.0498112	0.960306	0.993574
cg18397279	PCDH11X	27328	X	91036807	-4.14967	4.32e-05	0.00646924	1.27666	0.202696	0.949735
cg25950036	PTPRN2	5799	7	158342934	-4.14879	4.33e-05	0.00648602	0.197306	0.84372	0.998721
cg05029625		0	X	64627755	-4.14745	4.36e-05	0.00651524	NA	NA	NA
cg07340447	ODZ4	26011	11	78369177	-4.1467	4.37e-05	0.00652875	-0.711438	0.477358	1.00384
cg03260259		0	7	63032879	-4.14382	4.42e-05	0.00659299	NA	NA	NA
cg26724545	C5orf58	133874	5	169659950	-4.14288	4.44e-05	0.00660479	0.190748	0.84885	0.997868
cg11858880		0	18	77319357	-4.1402	4.49e-05	0.00667139	NA	NA	NA
cg11304240	CHST11	50515	12	105150870	-4.13886	4.51e-05	0.0067014	-2.07808	0.0385407	0.650826
cg05010615		0	16	89143930	-4.13595	4.57e-05	0.0067752	NA	NA	NA
cg14184794		0	10	39023095	-4.13479	4.59e-05	0.00680058	NA	NA	NA
cg00245492	FMN2	56776	1	240370865	-4.13424	4.6e-05	0.00680904	0.596459	0.551313	1.00986
cg12085155	ELFN2	114794	22	37769679	-4.13404	4.6e-05	0.00680735	0.355981	0.722102	1.01044
cg03372659		0	22	49698771	-4.13324	4.62e-05	0.00682292	NA	NA	NA
cg26265933		0	12	132968020	-4.12967	4.69e-05	0.00691694	NA	NA	NA
cg17129764	MMP17	4326	12	132334515	-4.12952	4.69e-05	0.00691388	-1.59958	0.11073	0.86224
cg18530762	FAM19A5	25817	22	49138511	-4.12932	4.69e-05	0.00691257	-0.374419	0.708353	1.0121
cg13102244	PTPRN2	5799	7	158198569	-4.12927	4.7e-05	0.00690685	0.197306	0.84372	0.998721
cg07725849		0	2	239542273	-4.12879	4.7e-05	0.00691316	NA	NA	NA
cg12794781	BEND7	222389	10	13513994	-4.12825	4.72e-05	0.00692161	-1.48486	0.138618	0.896608
cg07580975		0	1	200843333	-4.1279	4.72e-05	0.00692435	NA	NA	NA
cg14078235		0	6	169261355	-4.12746	4.73e-05	0.00692984	NA	NA	NA
cg06215569	ALX3	257	1	110611465	-4.12485	4.78e-05	0.00699754	1.16501	0.244929	0.972423
cg11051669	ANKRD11	29123	16	89346436	-4.12308	4.82e-05	0.00704123	-3.93112	0.000104753	0.0121882
cg20334313		0	8	50822381	-4.12305	4.82e-05	0.00703505	NA	NA	NA
cg20487025	KCNH6	81033	17	61613121	-4.12296	4.82e-05	0.00703047	0.827058	0.408853	1.00535
cg00392316		0	8	313956	-4.12245	4.83e-05	0.00703801	NA	NA	NA
cg16031567		0	10	46195673	-4.12191	4.84e-05	0.00704649	NA	NA	NA
cg02269643		0	14	70701025	-4.12065	4.86e-05	0.00706859	NA	NA	NA
cg15754499		0	19	28400822	-4.11993	4.88e-05	0.00708235	NA	NA	NA
cg12501274	ADARB2	105	10	1743362	-4.11884	4.9e-05	0.00710693	-1.16101	0.246547	0.973279
cg20355401	DCAKD	79877	17	43111526	-4.11859	4.91e-05	0.00710679	-1.29105	0.197668	0.945323
cg03886520	SLC45A1	50651	1	8395396	-4.11839	4.91e-05	0.00710564	0.249766	0.802937	1.00145
cg03002835	FRMD1	79981	6	168476648	-4.11808	4.92e-05	0.00710722	1.28185	0.200871	0.946915
cg22674699	HOXD9	3235	2	176987918	-4.11776	4.92e-05	0.00710959	-1.31681	0.188895	0.937212
cg19503030	PCDHB2	56133	5	140476324	-4.11748	4.93e-05	0.0071104	0.827964	0.40834	1.00544
cg12222588	BRUNOL4	56853	18	34823808	-4.11738	4.93e-05	0.00710632	-0.748898	0.454498	1.00368
cg14012310		0	13	79181947	-4.11659	4.95e-05	0.00712203	NA	NA	NA
cg06560223	RASA3	22821	13	114838878	-4.11613	4.96e-05	0.00712842	-0.70202	0.483204	1.00573
cg27633533	CDH4	1002	20	60502091	-4.11546	4.97e-05	0.00714084	-0.109093	0.913201	0.993451
cg13872005		0	2	105275613	-4.11423	4.99e-05	0.0071624	NA	NA	NA
cg00121551	ZNF831	128611	20	57766397	-4.11404	5e-05	0.00716089	-0.795492	0.426948	1.00916
cg12325536	LOC645323	0	5	87968658	-4.11393	5e-05	0.00715697	NA	NA	NA
cg17097782	OSR1	130497	2	19551860	-4.11389	5e-05	0.00715083	-1.02567	0.305863	0.987762
cg00561194		0	10	38069720	-4.11387	5e-05	0.00714429	NA	NA	NA
cg01642521		0	11	20618250	-4.11298	5.02e-05	0.00716328	NA	NA	NA
cg20403387		0	16	1088568	-4.11131	5.06e-05	0.00719814	NA	NA	NA
cg18531401		0	5	177482700	-4.11101	5.06e-05	0.00719972	NA	NA	NA
cg21737734	LOXHD1	125336	18	44236847	-4.10897	5.1e-05	0.00725297	2.77971	0.0057798	0.272463
cg09362543	PODN	127435	1	53544301	-4.10546	5.18e-05	0.00735084	0.0581175	0.953693	0.993217
cg26722179	TMEM175	84286	4	949689	-4.10528	5.18e-05	0.00734916	0.636549	0.524898	1.01039
cg10783925	MAEA	10296	4	1322681	-4.10223	5.25e-05	0.00743417	0.34351	0.731452	1.00921
cg00889398		0	13	28502089	-4.10168	5.26e-05	0.00744354	NA	NA	NA
cg19908812	NPY1R	4886	4	164253006	-4.09965	5.3e-05	0.00749063	1.42299	0.155766	0.91518
cg04392266		0	10	45720134	-4.09888	5.32e-05	0.0075069	NA	NA	NA
cg05647906	HGC6.3	100128124	6	168378810	-4.09779	5.34e-05	0.00753306	2.57362	0.0105379	0.385667
cg26698781		0	16	30845818	-4.09759	5.35e-05	0.00753181	NA	NA	NA
cg09677268	ZSCAN1	284312	19	58556044	-4.09541	5.4e-05	0.00758437	0.0860495	0.931484	0.995584
cg22656750	ODZ2	57451	5	167689454	-4.09444	5.42e-05	0.00759933	-1.01328	0.311734	0.991294
cg02817601		0	16	89144489	-4.09309	5.45e-05	0.00763397	NA	NA	NA
cg11666555	SPEG	10290	2	220313972	-4.09287	5.45e-05	0.00763318	-1.82694	0.0686891	0.77329
cg15457314	DSCAML1	57453	11	117352822	-4.09229	5.46e-05	0.00764377	0.701804	0.483338	1.00559
cg25924421		0	7	23695323	-4.09174	5.48e-05	0.00765371	NA	NA	NA
cg18961681		0	7	32467657	-4.09123	5.49e-05	0.00766221	NA	NA	NA
cg01544213	PCDHGA4;PCDHGA6;PCDHGA1;PCDHGA5;PCDHGB1;PCDHGB4;PCDHGA3;PCDHGA2;PCDHGA8;PCDHGA7;PCDHGB2;PCDHGB3	56111	5	140774440	-4.09085	5.5e-05	0.00765909	-0.378441	0.705367	1.01171
cg19919881	PWWP2B	170394	10	134209611	-4.08829	5.55e-05	0.00773183	0.0242528	0.980667	0.996257
cg07092985	RP1	6101	8	55533887	-4.0882	5.56e-05	0.00772712	0.9493	0.343222	0.99306
cg24641193	PRDM16	63976	1	3147941	-4.08805	5.56e-05	0.00772451	-0.246276	0.805635	1.00096
cg03890730		0	6	126964727	-4.08786	5.56e-05	0.00772294	NA	NA	NA
cg03511173		0	18	77590860	-4.08765	5.57e-05	0.00772188	NA	NA	NA
cg01094108	GLI3	2737	7	42005385	-4.08686	5.59e-05	0.00773959	-1.13387	0.257741	0.974102
cg11681219	TOMM20;SNORA14B	9804	1	235291909	-4.08666	5.59e-05	0.00773824	3.0307	0.00264965	0.161621
cg10615842		0	11	20619158	-4.08451	5.64e-05	0.00779885	NA	NA	NA
cg01244243	TTLL8	164714	22	50470419	-4.08282	5.68e-05	0.00784538	2.57162	0.0105975	0.385744
cg11692435		0	8	1105844	-4.08276	5.68e-05	0.00783973	NA	NA	NA
cg17392573		0	6	27259010	-4.07867	5.78e-05	0.00796382	NA	NA	NA
cg26133541	CHST8	64377	19	34263905	-4.07864	5.78e-05	0.00795718	0.254977	0.798913	1.00201
cg27163412		0	9	137358801	-4.07793	5.8e-05	0.00797253	NA	NA	NA
cg18369327	LOC100289673	0	5	109221111	-4.07369	5.9e-05	0.0080959	NA	NA	NA
cg09793121	OLIG2	10215	21	34398263	-4.07348	5.9e-05	0.00809491	1.91479	0.0564577	0.727087
cg02616434	BEND2	139105	X	18239013	-4.07158	5.95e-05	0.00814205	-0.464651	0.642514	1.01484
cg01731204	MATN1	4146	1	31194554	-4.0711	5.96e-05	0.00815006	0.798574	0.425161	1.00968
cg17152757	GHSR	2693	3	172166258	-4.06944	6e-05	0.00819744	1.20753	0.228166	0.968936
cg07767350		0	5	1769385	-4.06906	6.01e-05	0.00820227	NA	NA	NA
cg01405084		0	1	13881447	-4.06885	6.01e-05	0.00820159	NA	NA	NA
cg01181227		0	4	1399135	-4.06777	6.04e-05	0.00822976	NA	NA	NA
cg20735954	SYNGR1	9145	22	39777886	-4.06763	6.04e-05	0.00822651	0.942237	0.346819	0.991496
cg01954930	LOC255025	0	3	94656939	-4.06733	6.05e-05	0.00822885	NA	NA	NA
cg16555533	PCDHA6;PCDHA2;PCDHA1;PCDHA9;PCDHA7;PCDHA5;PCDHA10;PCDHA3;PCDHA4;PCDHA8	56142	5	140243006	-4.0667	6.07e-05	0.00824193	0.115675	0.907986	0.995797
cg26105076		0	7	63561037	-4.06609	6.08e-05	0.00825484	NA	NA	NA
cg06926314	ANKRD33B	651746	5	10650351	-4.06607	6.08e-05	0.00824735	NA	NA	NA
cg10434261		0	1	156358059	-4.06605	6.08e-05	0.00824027	NA	NA	NA
cg14998567	MYLK4	340156	6	2685525	-4.06566	6.09e-05	0.00824559	0.138961	0.889573	0.995508
cg18274480		0	5	145713863	-4.06377	6.14e-05	0.00830126	NA	NA	NA
cg03444855		0	2	621920	-4.06276	6.16e-05	0.00832763	NA	NA	NA
cg10888878		0	1	48459961	-4.06243	6.17e-05	0.00833093	NA	NA	NA
cg00675721		0	19	39739215	-4.06217	6.18e-05	0.00833164	NA	NA	NA
cg23877021	RIMBP2	23504	12	130953814	-4.06107	6.21e-05	0.0083613	-0.787561	0.431567	1.00498
cg09303881		0	1	165910641	-4.06071	6.22e-05	0.00836557	NA	NA	NA
cg08933615		0	1	149146618	-4.06052	6.22e-05	0.00836411	NA	NA	NA
cg18191259	KIF17	57576	1	21031009	-4.05687	6.31e-05	0.00847285	1.44867	0.14846	0.906663
cg19752540		0	X	75249335	-4.05527	6.35e-05	0.00852014	NA	NA	NA
cg15679064	DBP	1628	19	49134105	-4.0542	6.38e-05	0.00854907	0.225216	0.821962	1.00105
cg08858466	SFMBT2	57713	10	7409783	-4.05343	6.4e-05	0.00856775	0.223863	0.823014	1.00081
cg15939357	IRGC	56269	19	44223465	-4.05274	6.42e-05	0.00858399	0.0768883	0.938763	0.991258
cg00895834	PRDM16	63976	1	3147966	-4.05186	6.44e-05	0.00860632	-0.246276	0.805635	1.00096
cg12397584		0	12	58068688	-4.04778	6.55e-05	0.00873369	NA	NA	NA
cg04422985		0	7	9765993	-4.04771	6.55e-05	0.00872813	NA	NA	NA
cg19884223	PCDHB7	56129	5	140554610	-4.04533	6.62e-05	0.00879607	-0.767193	0.443562	1.00308
cg19925849	CACNG7	59284	19	54445377	-4.04492	6.63e-05	0.00880242	3.10409	0.00208829	0.13873
cg05301368	LOC100130017	0	4	69048233	-4.04217	6.7e-05	0.00889272	NA	NA	NA
cg00603418	NCRNA00164	554226	2	133013792	-4.04199	6.71e-05	0.00889114	0.141125	0.887865	0.996478
cg07316743	TSSK2;DGCR14	23617	22	19119296	-4.04179	6.71e-05	0.00888999	NA	NA	NA
cg19882093	GGTLC1	92086	20	23969397	-4.04177	6.71e-05	0.0088825	0.243895	0.807477	1.00084
cg12129249	LINGO1	84894	15	77907530	-4.04086	6.74e-05	0.00890692	0.570189	0.568971	1.01191
cg03537537	DCAF4L2	138009	8	88886262	-4.04052	6.75e-05	0.00891085	3.74944	0.000212138	0.022125
cg02973644	PTPRN2	5799	7	158350090	-4.03951	6.77e-05	0.00893896	0.197306	0.84372	0.998721
cg21104950	PCBP3	54039	21	47345138	-4.0395	6.77e-05	0.0089313	1.06975	0.285582	0.980301
cg21350073	PRR23A	729627	3	138724834	-4.03859	6.8e-05	0.00895599	-0.545395	0.585882	1.01117
cg00540400		0	15	79124168	-4.03694	6.84e-05	0.00900751	NA	NA	NA
cg10572951	KCNN3	3782	1	154744863	-4.03453	6.91e-05	0.00908716	0.256547	0.797702	1.00168
cg16368579		0	18	514536	-4.03437	6.92e-05	0.00908464	NA	NA	NA
cg23948391		0	15	20150114	-4.03304	6.95e-05	0.00911696	NA	NA	NA
cg03203197		0	16	34587120	-4.033	6.95e-05	0.00911001	NA	NA	NA
cg10762517		0	2	621426	-4.03261	6.97e-05	0.00911618	NA	NA	NA
cg12878812	SRRM4	84530	12	119419696	-4.03114	7.01e-05	0.00916183	4.84205	2.04916e-06	0.000374978
cg11795222		0	14	101924858	-4.03014	7.04e-05	0.00919057	NA	NA	NA
cg09903049		0	7	16566551	-4.02885	7.07e-05	0.00923026	NA	NA	NA
cg22270027		0	4	81128234	-4.02775	7.1e-05	0.00925416	NA	NA	NA
cg21367187	JPH2	57158	20	42744457	-4.02577	7.16e-05	0.00931984	-0.743849	0.457543	1.00271
cg18507379	PCDHGA4;PCDHGA6;PCDHGA9;PCDHGA1;PCDHGA8;PCDHGA5;PCDHGB1;PCDHGB6;PCDHGB4;PCDHGA3;PCDHGA2;PCDHGA7;PCDHGB2;PCDHGB5;PCDHGB3	56111	5	140787507	-4.02434	7.2e-05	0.00936547	-0.378441	0.705367	1.01171
cg22387550	KPRP	448834	1	152733337	-4.02341	7.23e-05	0.0093919	-0.319776	0.749358	1.00666
cg07360731	MMP17	4326	12	132334499	-4.02331	7.23e-05	0.00938714	-1.59958	0.11073	0.86224
cg16699022	ANKRD11	29123	16	89371566	-4.02322	7.23e-05	0.00938188	-3.93112	0.000104753	0.0121882
cg14956197		0	14	36993831	-4.02319	7.24e-05	0.00937471	NA	NA	NA
cg09243445	ASB18	401036	2	237123016	-4.02062	7.31e-05	0.00946371	-0.315216	0.752814	1.00654
cg08363794	HOXD9	3235	2	176986460	-4.01949	7.34e-05	0.00949845	-1.31681	0.188895	0.937212
cg19180514		0	X	51361516	-4.01899	7.36e-05	0.00950866	NA	NA	NA
cg20406460		0	5	3606489	-4.01784	7.39e-05	0.00954433	NA	NA	NA
cg17431358		0	10	125816521	-4.01761	7.4e-05	0.00954442	NA	NA	NA
cg09921392	RNF166	115992	16	88763929	-4.01676	7.43e-05	0.0095687	0.228575	0.819353	1.00132
cg06035437		0	8	1398411	-4.01569	7.46e-05	0.00960127	NA	NA	NA
cg02833016	COL22A1	169044	8	139890086	-4.01555	7.46e-05	0.00959796	-0.616365	0.538115	1.01014
cg06818975	TMEM151A	256472	11	66063091	-4.01533	7.47e-05	0.00959777	-0.102367	0.918533	0.995164
cg26968501		0	X	82765734	-4.01402	7.51e-05	0.00963975	NA	NA	NA
cg07899681		0	19	22444714	-4.0138	7.51e-05	0.00963963	NA	NA	NA
cg10125317	HOXD10	3236	2	176982230	-4.01374	7.52e-05	0.00963353	-2.03216	0.0430067	0.673683
cg12030842	MUC2	4583	11	1095607	-4.01274	7.55e-05	0.00966343	-1.53569	0.125655	0.883447
cg11058512		0	8	1137758	-4.01133	7.59e-05	0.00970975	NA	NA	NA
cg14222229		0	1	149137747	-4.01103	7.6e-05	0.0097128	NA	NA	NA
cg13770495		0	X	37404519	-4.01048	7.62e-05	0.00972542	NA	NA	NA
cg14511364	ADARB2	105	10	1252504	-4.01046	7.62e-05	0.00971755	-1.16101	0.246547	0.973279
cg07007780	BEND2	139105	X	18239038	-4.01043	7.62e-05	0.00971009	-0.464651	0.642514	1.01484
cg24625894	SLC39A4	55630	8	145638202	-4.00923	7.65e-05	0.00973967	-0.683099	0.495064	1.00831
cg13752114	MUC4	4585	3	195489708	-4.00862	7.67e-05	0.00975502	-1.17003	0.242907	0.974
cg09305478	FAM195A	84331	16	691988	-4.00773	7.7e-05	0.00978099	0.812117	0.41736	1.00696
cg27180153		0	13	25320559	-4.00524	7.78e-05	0.00987078	NA	NA	NA
cg18887005		0	22	49447430	-4.00506	7.78e-05	0.00986909	NA	NA	NA
cg13287519	KLHL29	114818	2	23865749	-4.00486	7.79e-05	0.00986813	-1.15116	0.25057	0.975199
cg02714192	NFATC1	4772	18	77201972	-4.00375	7.82e-05	0.0099035	-1.28061	0.201305	0.94741
cg03722643	GPR45	11250	2	105858861	-4.00303	7.85e-05	0.00992354	0.34839	0.727788	1.01053
cg15757507	LOC150185	0	22	19554171	-4.00291	7.85e-05	0.00991946	NA	NA	NA
cg21966075		0	1	156358066	-4.00237	7.87e-05	0.00993232	NA	NA	NA
cg15656087	CDH4	1002	20	60502022	-4.00114	7.91e-05	0.00997244	-0.109093	0.913201	0.993451
cg11753363	MDGA1	266727	6	37626255	-4.00075	7.92e-05	0.00997915	-0.576739	0.564543	1.01127
cg19150282		0	13	111672550	-3.99928	7.97e-05	0.0100295	NA	NA	NA
cg08914875		0	7	516828	-3.99921	7.97e-05	0.0100233	NA	NA	NA
cg00769251	CDH11	1009	16	64984838	-3.99881	7.98e-05	0.0100219	0.0392196	0.968741	0.994836
cg20879601	CARD11	84433	7	2946264	-3.9979	8.01e-05	0.0100496	-1.4556	0.146534	0.902015
cg24602417		0	8	102236283	-3.9973	8.03e-05	0.010065	NA	NA	NA
cg09578475	ZNF177	7730	19	9473688	-3.9963	8.06e-05	0.0100967	0.562576	0.574138	1.0118
cg25969272		0	4	78034410	-3.99597	8.07e-05	0.010101	NA	NA	NA
cg08901578		0	4	187885870	-3.99582	8.08e-05	0.0100983	NA	NA	NA
cg08195247		0	2	176933286	-3.99558	8.09e-05	0.0100992	NA	NA	NA
cg10356429		0	X	64627572	-3.99513	8.1e-05	0.0100995	NA	NA	NA
cg17236526		0	16	1179941	-3.99408	8.13e-05	0.0101333	NA	NA	NA
cg14583127		0	10	37940493	-3.99274	8.18e-05	0.0101793	NA	NA	NA
cg05661164	KRT83	3889	12	52715043	-3.99224	8.19e-05	0.0101816	-0.998429	0.318865	0.989889
cg22869726	OLIG2	10215	21	34398265	-3.99062	8.25e-05	0.0102393	1.91479	0.0564577	0.727087
cg26149765		0	11	49456067	-3.99034	8.26e-05	0.0102418	NA	NA	NA
cg19937061		0	13	25320133	-3.98957	8.28e-05	0.0102645	NA	NA	NA
cg17843376	DPP6	1804	7	154586335	-3.98955	8.28e-05	0.0102563	0.774997	0.438944	1.00335
cg20906291		0	6	10382103	-3.98932	8.29e-05	0.0102567	NA	NA	NA
cg08609238		0	9	98113543	-3.98867	8.31e-05	0.0102748	NA	NA	NA
cg18061197	RGS22	26166	8	101117958	-3.98606	8.4e-05	0.0103736	1.05216	0.293561	0.982391
cg02077481		0	16	33939020	-3.98464	8.45e-05	0.0104239	NA	NA	NA
cg09542111	GRIK1	2897	21	31312091	-3.98404	8.47e-05	0.0104305	-0.501623	0.616296	1.01526
cg11915671	TUBB4;MIR220B	10382	19	6495897	-3.98327	8.49e-05	0.010454	2.09594	0.0369142	0.63726
cg07155318		0	20	59599304	-3.98147	8.56e-05	0.0105202	NA	NA	NA
cg08864645		0	6	33943929	-3.98089	8.58e-05	0.0105358	NA	NA	NA
cg25993718	CBLN4	140689	20	54580196	-3.98056	8.59e-05	0.0105405	0.852223	0.394761	1.00267
cg11314211	EBF3	253738	10	131666314	-3.97966	8.62e-05	0.0105695	0.910636	0.363208	0.996324
cg00339739		0	19	12371129	-3.97953	8.62e-05	0.0105656	NA	NA	NA
cg14450608		0	15	35385118	-3.97688	8.71e-05	0.0106598	NA	NA	NA
cg14238959		0	12	114885270	-3.97652	8.73e-05	0.0106663	NA	NA	NA
cg12631713	AJAP1	55966	1	4771985	-3.97573	8.75e-05	0.0106905	-1.1465	0.25249	0.975502
cg06566039	HDGFL1	154150	6	22569785	-3.97496	8.78e-05	0.0107146	-0.307363	0.758778	1.00596
cg11227822		0	13	53774359	-3.97466	8.79e-05	0.0107181	NA	NA	NA
cg09522056		0	16	31830979	-3.9745	8.8e-05	0.0107159	NA	NA	NA
cg13544333		0	10	101287381	-3.97427	8.81e-05	0.0107163	NA	NA	NA
cg26420606	L3MBTL4	91133	18	6284460	-3.97402	8.81e-05	0.010718	-0.162863	0.870735	0.996589
cg14951132	NRK	203447	X	105067038	-3.97396	8.82e-05	0.0107113	0.878153	0.380554	0.997939
cg09118625	DIRAS3	9077	1	68512971	-3.97327	8.84e-05	0.0107317	-0.380092	0.704143	1.01103
cg09185826		0	16	34407715	-3.97264	8.86e-05	0.0107495	NA	NA	NA
cg17514558	PCDHB19P	84054	5	140621375	-3.9716	8.9e-05	0.0107853	0.202113	0.839964	0.999151
cg14597280	PTPRN2	5799	7	158198692	-3.97142	8.91e-05	0.0107838	0.197306	0.84372	0.998721
cg27293992		0	2	171671648	-3.97108	8.92e-05	0.0107892	NA	NA	NA
cg06522681	CCDC105	126402	19	15121596	-3.97088	8.93e-05	0.0107888	-0.149022	0.881635	0.995593
cg05123755		0	7	2758116	-3.97063	8.93e-05	0.0107905	NA	NA	NA
cg05894948	SCN1B	6324	19	35523468	-3.97025	8.95e-05	0.0107978	-0.115824	0.907869	0.995722
cg00404788	APBA1	320	9	72132173	-3.97007	8.95e-05	0.0107963	1.13957	0.255361	0.974625
cg18621819	ADAMTS2	9509	5	178651074	-3.96952	8.97e-05	0.0108106	0.25877	0.795988	1.0019
cg25017620		0	1	247802802	-3.96921	8.99e-05	0.0108152	NA	NA	NA
cg05484508	SPG7	6687	16	89589025	-3.96913	8.99e-05	0.0108095	-2.73464	0.00661142	0.292486
cg14015441	DPYS	1807	8	105479318	-3.96781	9.04e-05	0.0108571	-0.530261	0.596318	1.01285
cg07824649	ZFPM1	161882	16	88569490	-3.96742	9.05e-05	0.0108649	-0.452685	0.651099	1.01644
cg04739647	HOXD9	3235	2	176987462	-3.96708	9.06e-05	0.0108703	-1.31681	0.188895	0.937212
cg10997479		0	3	62362924	-3.9668	9.07e-05	0.0108645	NA	NA	NA
cg00572058	UNC80	285175	2	210673437	-3.96667	9.08e-05	0.0108519	0.632578	0.527485	1.00996
cg09946603		0	6	56297393	-3.96651	9.08e-05	0.0108494	NA	NA	NA
cg19573236		0	10	65733388	-3.96636	9.09e-05	0.0108468	NA	NA	NA
cg06792448	MIR432;MIR136;RTL1	574451	14	101349632	-3.96397	9.17e-05	0.0109415	NA	NA	NA
cg21051907		0	14	104896488	-3.96365	9.19e-05	0.0109466	NA	NA	NA
cg04794430		0	17	3290071	-3.96357	9.19e-05	0.010941	NA	NA	NA
cg05003890	MYOM2	9172	8	2046752	-3.96351	9.19e-05	0.0109342	0.454764	0.649603	1.01655
cg17504999	PCDH10	57575	4	134072723	-3.96304	9.21e-05	0.0109458	0.856887	0.392182	1.00143
cg05674692		0	2	91911370	-3.96215	9.24e-05	0.0109752	NA	NA	NA
cg01856384		0	6	41376904	-3.95869	9.37e-05	0.0111182	NA	NA	NA
cg13067553		0	1	147782452	-3.95834	9.38e-05	0.0111247	NA	NA	NA
cg26657235		0	6	150378972	-3.95749	9.41e-05	0.0111529	NA	NA	NA
cg10506497	DHRS7C	201140	17	9674987	-3.95709	9.43e-05	0.0111615	-0.626843	0.531233	1.01156
cg10249375		0	1	63795934	-3.95668	9.45e-05	0.0111704	NA	NA	NA
cg10993470	RP1	6101	8	55533939	-3.95507	9.51e-05	0.0112327	0.9493	0.343222	0.99306
cg15030397	PCDHGA4;PCDHGA7;PCDHGA6;PCDHGA1;PCDHGA5;PCDHGB1;PCDHGA3;PCDHGA2;PCDHGB2;PCDHGB3	56111	5	140764679	-3.95454	9.53e-05	0.0112471	-0.378441	0.705367	1.01171
cg00187557		0	5	139081136	-3.95297	9.59e-05	0.0113083	NA	NA	NA
cg20043105	C14orf23	387978	14	29247458	-3.95285	9.59e-05	0.0113043	1.78739	0.0748707	0.792778
cg23614852	PCDHGB4;PCDHGA4;PCDHGA6;PCDHGA1;PCDHGA5;PCDHGB1;PCDHGA3;PCDHGA2;PCDHGA7;PCDHGB2;PCDHGB3	8641	5	140769482	-3.95198	9.62e-05	0.0113342	0.424084	0.671805	1.01423
cg05944967	NFATC1	4772	18	77166811	-3.95145	9.64e-05	0.0113489	-1.28061	0.201305	0.94741
cg12277416		0	19	2859153	-3.95123	9.65e-05	0.0113492	NA	NA	NA
cg14236662	HOXD9	3235	2	176988284	-3.94942	9.72e-05	0.0114218	-1.31681	0.188895	0.937212
cg27446137		0	4	77723198	-3.94891	9.74e-05	0.0114354	NA	NA	NA
cg18156686		0	10	134893401	-3.94759	9.79e-05	0.011486	NA	NA	NA
cg05369547	FLI1	2313	11	128680333	-3.94703	9.81e-05	0.0114927	-0.34266	0.732091	1.0092
cg11891843		0	20	61403381	-3.94647	9.84e-05	0.0115089	NA	NA	NA
cg02479299	TRIM50	135892	7	72726840	-3.94641	9.84e-05	0.0115022	0.196888	0.844047	0.99852
cg17985646	TBX20	57057	7	35293759	-3.94212	0.000100079	0.0116902	3.69508	0.000260639	0.0261015
cg13411015	OTX2	5015	14	57274900	-3.94191	0.000100161	0.0116902	-0.140751	0.88816	0.996642
cg22482502	KCND3	3752	1	112525384	-3.94191	0.000100163	0.0116808	-1.18234	0.237993	0.970731
cg12836313		0	7	156733574	-3.94118	0.000100452	0.011705	NA	NA	NA
cg09723488	LHX6	26468	9	124987896	-3.94102	0.000100518	0.0117031	-0.200019	0.841599	0.99962
cg15021640		0	22	49697802	-3.93971	0.000101043	0.0117546	NA	NA	NA
cg07277190	H1FNT	341567	12	48723631	-3.93849	0.00010153	0.0118016	-0.332305	0.739888	1.008
cg07645486	HAS1	3036	19	52217022	-3.93845	0.000101548	0.0117941	-1.07601	0.282777	0.97801
cg06048662	SLC6A19	340024	5	1216726	-3.93835	0.000101589	0.0117892	-0.456945	0.648037	1.01568
cg23983671	SALL3	27164	18	76755310	-3.93815	0.000101668	0.0117888	-1.00805	0.314232	0.989855
cg11301795		0	4	187892539	-3.93776	0.000101825	0.0117974	NA	NA	NA
cg21584493	PTPRN2	5799	7	158342721	-3.93742	0.000101965	0.011804	0.197306	0.84372	0.998721
cg04500879	WNT7B	7477	22	46327243	-3.93569	0.000102663	0.0118559	-2.39672	0.0171462	0.475393
cg05936441	SLC32A1	140679	20	37356844	-3.93539	0.000102786	0.0118605	-0.493646	0.621912	1.01479
cg02492740	UBQLN2	29978	X	56590362	-3.93228	0.000104062	0.011998	1.12161	0.262913	0.976057
cg11586570		0	7	63498133	-3.93175	0.000104279	0.0120133	NA	NA	NA
cg23314297	KCNG2	26251	18	77643260	-3.9317	0.000104299	0.0120059	0.795406	0.426998	1.00916
cg01565777	PRR23C	389152	3	138763424	-3.93084	0.000104655	0.0120371	-0.224231	0.822728	1.00095
cg00135497		0	4	155661849	-3.9308	0.000104673	0.0120295	NA	NA	NA
cg16187069		0	19	54151524	-3.93056	0.000104773	0.0120312	NA	NA	NA
cg25550279		0	7	53254983	-3.93045	0.000104819	0.0120268	NA	NA	NA
cg03686593	FAM38B	63895	18	11149470	-3.93023	0.000104908	0.0120273	1.90848	0.0572706	0.731937
cg13201808		0	11	43569269	-3.9293	0.000105296	0.0120621	NA	NA	NA
cg20168823	BRUNOL4	56853	18	34916738	-3.92927	0.000105308	0.0120538	-0.748898	0.454498	1.00368
cg20834681	KCNA5	3741	12	5153947	-3.92776	0.000105941	0.0121165	1.29767	0.195384	0.943818
cg07865444		0	8	47866659	-3.92743	0.000106077	0.0121223	NA	NA	NA
cg10451566	DLL4	54567	15	41228589	-3.92739	0.000106094	0.0121145	0.32322	0.746751	1.00659
cg06340899	FAM19A5	25817	22	49018971	-3.92738	0.000106097	0.0121052	-0.374419	0.708353	1.0121
cg05255915		0	17	20687912	-3.92719	0.000106177	0.0121046	NA	NA	NA
cg12635578		0	20	56780766	-3.92663	0.000106413	0.0121218	NA	NA	NA
cg12190994	SDK1	221935	7	4305061	-3.92632	0.000106546	0.0121273	-1.45431	0.146893	0.902016
cg08943004	SLC6A3	6531	5	1416873	-3.92631	0.000106548	0.0121178	2.88434	0.00420253	0.218586
cg22263548	SYNGR1	9145	22	39777685	-3.92601	0.000106676	0.0121227	0.942237	0.346819	0.991496
cg00098029		0	4	187984506	-3.92565	0.000106829	0.0121304	NA	NA	NA
cg09522251	LINGO1	84894	15	77906469	-3.92551	0.000106887	0.0121273	0.570189	0.568971	1.01191
cg26053547		0	18	77549871	-3.92363	0.000107683	0.0122079	NA	NA	NA
cg20823455	ZNF697	90874	1	120166605	-3.92343	0.00010777	0.0121983	-0.0310237	0.975271	0.995297
cg23651826		0	11	115630531	-3.92324	0.000107852	0.0121979	NA	NA	NA
cg07788092	ZNF177	7730	19	9473691	-3.92267	0.000108093	0.0122155	0.562576	0.574138	1.0118
cg07111008	KCND3	3752	1	112524769	-3.92251	0.000108163	0.0122137	-1.18234	0.237993	0.970731
cg09636302	HAL	3034	12	96389483	-3.92217	0.000108308	0.0122204	1.26176	0.208002	0.953297
cg21593903	VENTXP1	139538	X	26575822	-3.92092	0.000108845	0.0122712	2.0557	0.0406652	0.665487
cg20795680	C18orf1	753	18	13387658	-3.9207	0.000108936	0.0122718	-1.1759	0.240553	0.974266
cg03433510	BOLL	66037	2	198650208	-3.9206	0.000108983	0.0122673	1.28798	0.198733	0.945696
cg05938889	SOX7	83595	8	10583827	-3.92036	0.000109083	0.0122689	-0.371332	0.710649	1.01143
cg05324556	JPH3	57338	16	87648687	-3.91981	0.000109322	0.0122861	0.34516	0.730212	1.00986
cg00123324	SAPS2	9701	22	50875752	-3.91919	0.000109588	0.0123063	-1.72986	0.0846702	0.819782
cg16664405		0	10	111216962	-3.91871	0.0001098	0.0123204	NA	NA	NA
cg11813064		0	20	62003032	-3.91853	0.000109878	0.0123194	NA	NA	NA
cg18773522	NFATC1	4772	18	77180469	-3.91817	0.000110034	0.0123272	-1.28061	0.201305	0.94741
cg07772617	PXDN	7837	2	1653118	-3.91758	0.000110287	0.0123458	-0.274419	0.783949	1.00242
cg10079093	MMP15	4324	16	58079327	-3.91738	0.000110375	0.012346	0.150881	0.880169	0.995893
cg04195684	MLC1	23209	22	50515473	-3.91646	0.000110779	0.0123814	-0.455974	0.648734	1.01598
cg08049853		0	4	41875784	-3.91589	0.000111028	0.0123898	NA	NA	NA
cg14414501	SORCS2	57537	4	7512016	-3.91508	0.000111381	0.0124195	-0.428551	0.668554	1.01519
cg07887208	SAPS2	9701	22	50875606	-3.91505	0.000111397	0.0124115	-1.72986	0.0846702	0.819782
cg15668691	KCND2	3751	7	119915484	-3.91492	0.000111455	0.0124083	0.955995	0.339835	0.9921
cg17583504	TRPM4	54795	19	49669542	-3.91371	0.000111985	0.0124575	-0.0511706	0.959223	0.993527
cg08111158		0	1	227746191	-3.91313	0.000112243	0.0124765	NA	NA	NA
cg16008273		0	21	15038629	-3.91175	0.000112856	0.0125349	NA	NA	NA
cg04656042		0	19	39755901	-3.91068	0.000113334	0.0125781	NA	NA	NA
cg02018681		0	8	61834943	-3.91062	0.000113359	0.0125711	NA	NA	NA
cg16573782	CBLN1	869	16	49315536	-3.91023	0.000113536	0.0125809	1.58978	0.112924	0.866915
cg24362812	FAM38B	63895	18	11148769	-3.90973	0.000113758	0.0125957	1.90848	0.0572706	0.731937
cg03095607	MYT1L	23040	2	1846569	-3.90914	0.000114022	0.0126152	-0.0493466	0.960675	0.993498
cg23791524	NTF3	4908	12	5603595	-3.90897	0.000114098	0.0126138	-0.504891	0.614001	1.01555
cg10547527	BOLL	66037	2	198650123	-3.90826	0.000114418	0.0126295	1.28798	0.198733	0.945696
cg05992726	PDZRN4	29951	12	41967396	-3.90763	0.000114705	0.0126514	0.952791	0.341453	0.993079
cg20289746	ITPRIP	85450	10	106075738	-3.90742	0.000114799	0.012652	-1.16589	0.244575	0.972933
cg08198486	FBLN2	2199	3	13612434	-3.9053	0.000115761	0.0127481	-0.399096	0.690103	1.01129
cg05413325		0	8	1397936	-3.90492	0.000115935	0.0127574	NA	NA	NA
cg15398400	C10orf82	143379	10	118429481	-3.90465	0.000116058	0.0127611	3.36572	0.000861455	0.0710665
cg15511625	ATP2B2	491	3	10400548	-3.90385	0.000116426	0.0127917	0.267465	0.789293	1.00212
cg04660829		0	4	1505559	-3.90368	0.000116501	0.01279	NA	NA	NA
cg03909500	RXFP3	51289	5	33936597	-3.90356	0.000116555	0.0127861	-0.547858	0.584191	1.01189
cg25036261	NRXN1	9378	2	51254823	-3.90326	0.000116693	0.0127914	-0.845679	0.398397	1.00342
cg06406536		0	18	76766588	-3.90104	0.000117718	0.0128938	NA	NA	NA
cg20760609		0	5	3962310	-3.9003	0.000118064	0.0129218	NA	NA	NA
cg07167994		0	15	101094534	-3.89782	0.000119218	0.0130381	NA	NA	NA
cg19717586	NTM	50863	11	131781257	-3.89748	0.000119378	0.0130456	-0.438121	0.66161	1.01676
cg25633130	C5orf47	133491	5	173415963	-3.89688	0.00011966	0.0130663	0.152789	0.878666	0.995815
cg15915028		0	1	27528084	-3.89658	0.000119804	0.013072	NA	NA	NA
cg02526277	LOC494141	494141	11	18230620	-3.89623	0.000119966	0.0130697	0.561802	0.574665	1.01123
cg23364040		0	X	125714973	-3.89573	0.000120204	0.0130656	NA	NA	NA
cg06328611		0	10	3360027	-3.89564	0.000120246	0.0130602	NA	NA	NA
cg19407095	SOX1	6656	13	112721778	-3.89525	0.000120431	0.0130703	-0.413624	0.679441	1.01375
cg18428234		0	12	52652742	-3.89424	0.000120909	0.0131122	NA	NA	NA
cg24007638		0	9	38478533	-3.89324	0.000121385	0.0131538	NA	NA	NA
cg02154269	OTOP1	133060	4	4228637	-3.89303	0.000121486	0.0131548	1.73422	0.0838927	0.818157
cg24082072	SLC8A2	6543	19	47960106	-3.89278	0.000121607	0.0131579	2.22756	0.0266415	0.566878
cg08598654	DLX6AS	285987	7	96631384	-3.89235	0.000121809	0.0131697	1.34524	0.179549	0.932441
cg07534099	IRF2	3660	4	185377809	-3.89216	0.000121902	0.0131698	-1.40755	0.160285	0.91789
cg19810034	PCDHA6;PCDHA2;PCDHA1;PCDHA10;PCDHA9;PCDHA7;PCDHA5;PCDHA3;PCDHA4;PCDHA8	56142	5	140235753	-3.89151	0.000122212	0.0131932	0.115675	0.907986	0.995797
cg27572999		0	19	360732	-3.89026	0.000122815	0.0132483	NA	NA	NA
cg04983327		0	17	25289961	-3.88853	0.000123652	0.0133285	NA	NA	NA
cg15470261		0	19	1698699	-3.88839	0.000123718	0.0133255	NA	NA	NA
cg10606269		0	12	131372010	-3.88678	0.000124504	0.0133899	NA	NA	NA
cg16347279	RAB37	326624	17	72667709	-3.88574	0.000125013	0.0134345	-0.971979	0.331834	0.990875
cg10493855	TTC7B	145567	14	91087586	-3.8854	0.000125178	0.0134421	-1.19721	0.232159	0.970334
cg17204569		0	22	16466518	-3.88529	0.000125234	0.013438	NA	NA	NA
cg20095233	GFRA1	2674	10	118033902	-3.88516	0.000125298	0.0134347	0.873246	0.383218	0.999067
cg25919948		0	7	63041305	-3.88509	0.000125332	0.0134283	NA	NA	NA
cg14991487	HOXD9	3235	2	176987404	-3.88471	0.00012552	0.0134181	-1.31681	0.188895	0.937212
cg13160528		0	6	166140118	-3.88439	0.000125677	0.0134248	NA	NA	NA
cg05167251	HOXD9	3235	2	176987465	-3.8841	0.00012582	0.01343	-1.31681	0.188895	0.937212
cg18870054	C19orf21	126353	19	758170	-3.88397	0.000125884	0.0134268	-1.39179	0.165003	0.922084
cg25235326	NFATC1	4772	18	77243457	-3.8837	0.000126016	0.0134308	-1.28061	0.201305	0.94741
cg07952877	NFATC1	4772	18	77171705	-3.88285	0.000126437	0.0134656	-1.28061	0.201305	0.94741
cg00646019		0	15	29034163	-3.88283	0.000126446	0.0134565	NA	NA	NA
cg03587978	GHSR	2693	3	172165696	-3.88263	0.000126547	0.0134572	1.20753	0.228166	0.968936
cg16752876	OSR1	130497	2	19553237	-3.88233	0.000126694	0.0134628	-1.02567	0.305863	0.987762
cg23188950		0	8	19095224	-3.87877	0.000128475	0.0136418	NA	NA	NA
cg06871798	BAI2	576	1	32208537	-3.87843	0.000128649	0.0136501	-0.779611	0.436226	1.00306
cg09014415		0	7	63033482	-3.87748	0.000129127	0.0136906	NA	NA	NA
cg24011501	MGAT5B	146664	17	74928863	-3.87718	0.000129279	0.0136966	-1.04147	0.298485	0.986085
cg09687864	KPRP	448834	1	152733118	-3.87703	0.000129353	0.0136942	-0.319776	0.749358	1.00666
cg07553115	IRS4	8471	X	107976167	-3.87693	0.000129406	0.0136896	-0.289409	0.772466	1.00329
cg02938422	LOC255025	0	3	94656733	-3.87686	0.00012944	0.0136831	NA	NA	NA
cg08623515	LOC154449	154449	6	170565117	-3.87686	0.000129442	0.0136731	-0.314917	0.753041	1.00637
cg10749618	SLC24A6	80024	12	113772658	-3.87564	0.000130058	0.0137178	-0.784692	0.433245	1.00401
cg01951489	TNN	63923	1	175048873	-3.87541	0.000130176	0.0137201	-1.42157	0.156176	0.915187
cg21783371	KLHL29	114818	2	23865706	-3.87524	0.000130265	0.0137194	-1.15116	0.25057	0.975199
cg20801603		0	18	77319289	-3.87443	0.000130676	0.0137525	NA	NA	NA
cg21183256		0	8	73163868	-3.87288	0.000131474	0.0138262	NA	NA	NA
cg19294953	PCDHGA4;PCDHGA11;PCDHGA9;PCDHGA1;PCDHGB1;PCDHGB6;PCDHGA12;PCDHGB3;PCDHGB7;PCDHGA6;PCDHGA8;PCDHGA10;PCDHGA5;PCDHGB4;PCDHGA3;PCDHGA2;PCDHGA7;PCDHGB2;PCDHGB5	56111	5	140812558	-3.8728	0.000131511	0.0138199	-0.378441	0.705367	1.01171
cg11681366		0	1	5772385	-3.87215	0.000131848	0.0138451	NA	NA	NA
cg00183415	HKDC1	80201	10	71008388	-3.87075	0.000132573	0.013911	0.844618	0.398988	1.00378
cg26911630	TBCD	6904	17	80899158	-3.87021	0.000132853	0.0139301	-0.253597	0.799979	1.00198
cg17130789	SLC11A1	6556	2	219256187	-3.87008	0.000132922	0.0139271	1.50907	0.132318	0.887516
cg20306534		0	18	47866594	-3.86968	0.000133128	0.0139384	NA	NA	NA
cg26935649	HAPLN4	404037	19	19369669	-3.86886	0.000133553	0.0139726	0.551164	0.581926	1.01162
cg07580895		0	4	1043494	-3.86859	0.000133694	0.0139771	NA	NA	NA
cg01681351	TPO	7173	2	1494063	-3.86837	0.00013381	0.013979	-0.466694	0.641053	1.01469
cg09506473	PSKH2	85481	8	87081978	-3.86808	0.000133965	0.0139849	-0.154214	0.877544	0.995552
cg06336984		0	12	132939185	-3.86601	0.000135053	0.0140882	NA	NA	NA
cg04413904		0	16	1088479	-3.86592	0.000135101	0.0140828	NA	NA	NA
cg24289821	MTUS2	23281	13	30054557	-3.86561	0.000135264	0.0140895	0.757602	0.449276	1.00338
cg14356362	COL5A1	1289	9	137693277	-3.86471	0.00013574	0.0141288	0.00293399	0.997661	0.999249
cg14755992	BEND7	222389	10	13515211	-3.86451	0.000135843	0.0141292	-1.48486	0.138618	0.896608
cg14002754	KCNQ2	3785	20	62097336	-3.86407	0.000136076	0.0141327	0.857419	0.391889	1.00144
cg14866863		0	14	58332116	-3.86393	0.000136153	0.0141304	NA	NA	NA
cg08333858		0	6	6058413	-3.86389	0.000136171	0.014122	NA	NA	NA
cg20597382		0	13	19448912	-3.86266	0.000136828	0.0141798	NA	NA	NA
cg20292653		0	2	5847374	-3.86227	0.000137035	0.0141909	NA	NA	NA
cg05678749	GABRG3	2567	15	27216819	-3.86165	0.00013737	0.0142153	-0.170717	0.86456	0.996206
cg15061647	PTPRN2	5799	7	158249209	-3.86095	0.000137744	0.0142437	0.197306	0.84372	0.998721
cg22265452		0	2	213697031	-3.86068	0.00013789	0.0142484	NA	NA	NA
cg17242353		0	18	76189809	-3.85937	0.000138595	0.0143109	NA	NA	NA
cg23556443	FAM38B	63895	18	11148776	-3.8592	0.000138691	0.0143104	1.90848	0.0572706	0.731937
cg06383247		0	2	6636145	-3.85689	0.000139946	0.0144294	NA	NA	NA
cg10489284	SLC12A7	10723	5	1088244	-3.85597	0.000140449	0.0144708	-0.527101	0.598508	1.01306
cg00678938	HGC6.3	100128124	6	168378903	-3.85566	0.000140617	0.0144777	2.57362	0.0105379	0.385667
cg26118142		0	17	3289363	-3.85451	0.000141248	0.0145216	NA	NA	NA
cg11272475		0	22	41460167	-3.8542	0.000141419	0.0145287	NA	NA	NA
cg24916020	ANKRD27	84079	19	33096688	-3.8524	0.000142416	0.0145995	-1.01491	0.310954	0.991162
cg26602314		0	17	3289453	-3.85212	0.000142571	0.0146049	NA	NA	NA
cg00917603	PCDHA6;PCDHA2;PCDHA1;PCDHA5;PCDHA3;PCDHA4	56142	5	140209956	-3.8513	0.000143028	0.0146412	0.115675	0.907986	0.995797
cg08220548		0	18	76160443	-3.85123	0.000143065	0.0146345	NA	NA	NA
cg03048902	SLC35D3	340146	6	137245441	-3.85114	0.000143114	0.014629	-0.120361	0.904277	0.994492
cg08126551	PDZD4	57595	X	153069729	-3.85088	0.000143262	0.0146126	-0.240507	0.810099	1.00083
cg02008154	TBX20	57057	7	35293537	-3.85086	0.000143269	0.0146029	3.69508	0.000260639	0.0261015
cg02610222	POU4F2	5458	4	147560282	-3.85078	0.000143316	0.0145972	-0.302389	0.762562	1.00488
cg21341928	PABPC3	5042	13	25670327	-3.85058	0.000143426	0.014598	1.43248	0.153034	0.911634
cg05874166	PTPRN2	5799	7	157695357	-3.85003	0.000143736	0.0146191	0.197306	0.84372	0.998721
cg03856401	MVP	9961	16	29853262	-3.84951	0.000144028	0.0146383	-1.60721	0.109046	0.860108
cg08204023	GDNF	2668	5	37835109	-3.84929	0.000144149	0.0146402	-0.284809	0.775984	1.00281
cg22509113		0	2	91777482	-3.84891	0.000144361	0.0146513	NA	NA	NA
cg24735628	RHOXF1	158800	X	119249676	-3.84883	0.000144411	0.0146459	1.26815	0.205714	0.952351
cg16732787	DUSP5P	574029	1	228785992	-3.84779	0.000144994	0.0146945	-0.648514	0.517142	1.00926
cg23768505	C18orf1	753	18	13262434	-3.84668	0.000145622	0.0147477	-1.1759	0.240553	0.974266
cg12302402	LOC494141	494141	11	18230629	-3.84544	0.000146324	0.0148083	0.561802	0.574665	1.01123
cg08617069	SCAMP4	113178	19	1919066	-3.84542	0.00014634	0.0147994	0.701783	0.483352	1.00552
cg15703632	PAX3;CCDC140	5077	2	223163725	-3.845	0.000146575	0.0148126	-0.59314	0.553528	1.01024
cg02167678	FAM38A	9780	16	88815867	-3.84392	0.000147191	0.0148538	-0.491545	0.623396	1.0154
cg14829948		0	7	159023827	-3.84243	0.00014805	0.0149299	NA	NA	NA
cg11374732	INPP5D	3635	2	234113197	-3.84183	0.000148395	0.0149541	-1.00092	0.31766	0.989809
cg04298609	ATRX	546	X	77041722	-3.84171	0.000148464	0.0149505	1.09859	0.272816	0.978181
cg00128571		0	6	4254857	-3.8409	0.000148934	0.0149872	NA	NA	NA
cg01918552	PACRG	135138	6	163521371	-3.84077	0.00014901	0.0149842	0.395693	0.692609	1.01128
cg17859634	FAM101A	144347	12	124798815	-3.84039	0.000149227	0.0149955	0.224091	0.822837	1.00096
cg14638044		0	4	1626643	-3.84019	0.000149344	0.0149966	NA	NA	NA
cg15724256	EN1	2019	2	119602857	-3.83927	0.000149878	0.0150397	0.533882	0.593813	1.01244
cg00506442	ACOT7	11332	1	6340054	-3.83866	0.000150231	0.0150645	0.355412	0.722528	1.01005
cg03700287	PCDHB19P	84054	5	140621697	-3.83808	0.000150571	0.0150773	0.202113	0.839964	0.999151
cg15428949		0	8	1308280	-3.83778	0.000150747	0.0150843	NA	NA	NA
cg20717585	PCDHGA2;PCDHGA1	56113	5	140720705	-3.83689	0.000151272	0.0151262	0.242406	0.808629	1.00085
cg19558933		0	11	134632242	-3.83591	0.000151849	0.0151626	NA	NA	NA
cg13609973	PABPC1P2	728773	2	147345085	-3.83585	0.000151881	0.0151552	1.18399	0.23734	0.970429
cg14045327		0	19	387968	-3.83405	0.000152945	0.0152507	NA	NA	NA
cg07609862	MTNR1B	4544	11	92702912	-3.83354	0.000153248	0.0152702	0.416331	0.677462	1.0138
cg22241820	LBXCOR1	390598	15	68122574	-3.83334	0.000153372	0.0152719	0.969447	0.333093	0.991985
cg19496566	GLTSCR2	29997	19	48249018	-3.83296	0.000153594	0.0152833	0.96998	0.332827	0.991781
cg11608646		0	10	54631333	-3.83227	0.000154009	0.0153139	NA	NA	NA
cg10515315		0	14	101290717	-3.83215	0.00015408	0.0153103	NA	NA	NA
cg17298751	SLC17A6	57084	11	22363370	-3.83192	0.000154214	0.0153129	-0.197386	0.843657	0.998764
cg02019988	SEMA3B	7869	3	50311211	-3.83093	0.000154807	0.0153504	-0.748907	0.454492	1.00378
cg15652381		0	7	57072283	-3.83074	0.000154923	0.0153512	NA	NA	NA
cg14092045		0	9	116450241	-3.83046	0.000155093	0.0153573	NA	NA	NA
cg10115022		0	1	27527942	-3.83037	0.000155145	0.0153518	NA	NA	NA
cg24025825		0	19	37761650	-3.82954	0.000155649	0.015391	NA	NA	NA
cg23290121		0	2	241612069	-3.82919	0.000155855	0.0154007	NA	NA	NA
cg06884789	AGAP5	729092	10	75434537	-3.82893	0.000156018	0.0154061	1.50944	0.132226	0.887487
cg13118410		0	11	49839281	-3.82819	0.000156463	0.0154393	NA	NA	NA
cg26087862	ENSA	2029	1	150602029	-3.82778	0.000156712	0.0154532	0.464452	0.642656	1.01475
cg00036263	KIF26B	55083	1	245852353	-3.8276	0.000156824	0.0154535	-0.39633	0.69214	1.01148
cg20784531		0	11	134534456	-3.82695	0.000157218	0.0154816	NA	NA	NA
cg02497830	SLC2A5	6518	1	9099281	-3.82692	0.000157236	0.0154727	0.704704	0.481534	1.00589
cg01620739	DPP6	1804	7	154585834	-3.82667	0.000157386	0.0154768	0.774997	0.438944	1.00335
cg14340829		0	8	923973	-3.82648	0.000157504	0.0154777	NA	NA	NA
cg03107436	ATP2B2	491	3	10400456	-3.82606	0.000157762	0.0154923	0.267465	0.789293	1.00212
cg17577701	GPR123	84435	10	134925902	-3.82541	0.000158157	0.0155097	1.53684	0.125373	0.88301
cg02851397	PCDHA7;PCDHA13;PCDHA12;PCDHA6;PCDHA10;PCDHA4;PCDHA11;PCDHA8;PCDHA1;PCDHA2;PCDHA9;PCDHA5;PCDHA3	56141	5	140264105	-3.82323	0.000159501	0.0156308	0.414437	0.678846	1.01399
cg19387239	MAML3	55534	4	140781385	-3.82255	0.000159916	0.0156607	0.569367	0.569528	1.01165
cg07751641		0	5	134826244	-3.82159	0.000160513	0.0156868	NA	NA	NA
cg22112133	WNT7A	7476	3	13896112	-3.82148	0.000160582	0.0156827	-1.75059	0.0810256	0.809813
cg18273840	HCN1	348980	5	45695643	-3.82126	0.000160722	0.0156857	-0.472337	0.637025	1.01542
cg21761204	HHIPL1	84439	14	100118878	-3.82093	0.000160924	0.0156946	0.0261281	0.979172	0.996348
cg21126707	MYF5	4617	12	81111012	-3.82092	0.000160929	0.0156844	2.09179	0.0372869	0.638764
cg01231921		0	2	241611991	-3.82029	0.000161327	0.0157016	NA	NA	NA
cg11681428	SLC6A18	348932	5	1243949	-3.81998	0.000161518	0.0157095	1.69074	0.0919108	0.830001
cg12630983	FBN2	2201	5	127872200	-3.81896	0.000162154	0.0157606	-0.457308	0.647777	1.01574
cg01542486	PTP4A3	11156	8	142440457	-3.81841	0.000162503	0.015773	-2.06337	0.0399259	0.657129
cg09615505		0	2	176977285	-3.8182	0.000162631	0.0157747	NA	NA	NA
cg00375983	TAS1R2	80834	1	19181390	-3.81779	0.00016289	0.015789	1.08578	0.278437	0.977444
cg08105265	EPX	8288	17	56274480	-3.81652	0.000163692	0.015856	1.85979	0.0638804	0.763115
cg02793415	KCNA1	3736	12	5021087	-3.81609	0.000163966	0.0158717	-0.381673	0.702971	1.01123
cg06901759		0	20	47001709	-3.8148	0.000164787	0.0159403	NA	NA	NA
cg03620886	ZGLP1	100125288	19	10420353	-3.81452	0.000164965	0.0159359	1.34714	0.178937	0.932634
cg01514490		0	10	7455338	-3.81411	0.000165223	0.01595	NA	NA	NA
cg00171192	CECR7	100130418	22	17518345	-3.81397	0.000165314	0.015948	0.555449	0.578996	1.01239
cg11982190	SHISA7	729956	19	55944451	-3.81345	0.000165646	0.0159692	1.43789	0.151494	0.910276
cg25306579	INPP5A	3632	10	134468976	-3.81291	0.000165993	0.0159918	-0.0259732	0.979296	0.996423
cg09766212		0	8	98636900	-3.81201	0.000166572	0.0160367	NA	NA	NA
cg04466022	MDGA1	266727	6	37618123	-3.81194	0.000166617	0.0160302	-0.576739	0.564543	1.01127
cg08020274	ZFPM1	161882	16	88573396	-3.81155	0.000166864	0.0160432	-0.452685	0.651099	1.01644
cg11791914	AJAP1	55966	1	4772257	-3.81136	0.000166987	0.0160442	-1.1465	0.25249	0.975502
cg05091491	RBMXL3;LRCH2	139804	X	114423926	-3.81043	0.000167593	0.0160915	-0.153147	0.878384	0.995776
cg09367696	OBSL1	23363	2	220420805	-3.80853	0.000168828	0.0161883	-0.125966	0.899842	0.994833
cg06731730	NOB1	28987	16	69788837	-3.80821	0.00016903	0.0161967	-0.726232	0.468256	1.00368
cg11429969	PCDHA2;PCDHA1;PCDHA3	56146	5	140180921	-3.80749	0.000169503	0.0162311	1.60894	0.108667	0.860146
cg24617612		0	8	49043544	-3.80709	0.000169765	0.0162453	NA	NA	NA
cg02155658	PAX1	5075	20	21690036	-3.8063	0.000170281	0.0162837	5.88088	1.07443e-08	2.88364e-06
cg00667937		0	2	168572563	-3.80509	0.00017108	0.0163492	NA	NA	NA
cg16491185	LOC100133469	0	14	106938509	-3.80501	0.00017113	0.016343	NA	NA	NA
cg05734295	EBF3	253738	10	131686486	-3.80499	0.000171148	0.0163337	0.910636	0.363208	0.996324
cg25476775		0	22	19644037	-3.80482	0.000171259	0.0163334	NA	NA	NA
cg20106214	IRGQ	126298	19	44097457	-3.80367	0.000172019	0.0163949	0.435204	0.663723	1.01536
cg06341731	BCL11B	64919	14	99641017	-3.80234	0.000172906	0.0164684	-0.399291	0.689959	1.01145
cg24035245		0	1	119535928	-3.80225	0.000172966	0.0164631	NA	NA	NA
cg13910651		0	5	3962477	-3.80163	0.000173378	0.0164913	NA	NA	NA
cg01342858		0	12	129330352	-3.80085	0.000173899	0.0165298	NA	NA	NA
cg08750504		0	2	172946193	-3.8002	0.000174338	0.0165605	NA	NA	NA
cg22680139		0	X	113625152	-3.79935	0.000174909	0.0166036	NA	NA	NA
cg21103385		0	7	155623788	-3.79924	0.000174979	0.0165992	NA	NA	NA
cg10205585	REXO1L2P	100288527	8	86567383	-3.79805	0.000175786	0.0166647	NA	NA	NA
cg13007481	TMEM198	130612	2	220412406	-3.79785	0.000175918	0.0166661	0.0296283	0.976383	0.995624
cg11309866	KCNH6	81033	17	61611293	-3.79756	0.000176116	0.0166738	0.827058	0.408853	1.00535
cg09391136		0	5	177398433	-3.79742	0.000176213	0.0166719	NA	NA	NA
cg02750262	ZADH2	284273	18	72916776	-3.79637	0.000176928	0.0167284	-1.371	0.171387	0.927129
cg05595753	ADARB2	105	10	1252146	-3.79575	0.000177348	0.016757	-1.16101	0.246547	0.973279
cg23612484		0	7	56942324	-3.79552	0.000177507	0.0167609	NA	NA	NA
cg16226106	MIR1-1;C20orf166	406904	20	61150516	-3.7951	0.000177793	0.0167768	NA	NA	NA
cg02688393	COL4A2	1284	13	111109497	-3.7942	0.00017841	0.0168127	0.756039	0.450211	1.00302
cg08072848		0	8	1245672	-3.79395	0.000178586	0.0168181	NA	NA	NA
cg18742986		0	18	47866749	-3.79372	0.000178743	0.0168218	NA	NA	NA
cg11005628	PCDHB12	56124	5	140590533	-3.7933	0.000179028	0.0168375	-0.395798	0.692532	1.01132
cg08726801	CACNA2D4	93589	12	1974122	-3.7927	0.000179441	0.0168652	0.0435052	0.965327	0.994375
cg26922690	SFMBT2	57713	10	7409669	-3.79249	0.000179591	0.0168682	0.223863	0.823014	1.00081
cg19375587		0	11	2871478	-3.79245	0.000179613	0.0168591	NA	NA	NA
cg15818557	MATN4	8785	20	43927098	-3.79176	0.00018009	0.0168928	0.303452	0.761753	1.00513
cg20379825		0	8	1106555	-3.79131	0.000180402	0.0169109	NA	NA	NA
cg06171908	USP29	57663	19	57630340	-3.79112	0.000180534	0.0169121	-0.294132	0.768858	1.00346
cg05152465		0	1	92001033	-3.79111	0.000180543	0.0169018	NA	NA	NA
cg12688521		0	1	5772057	-3.79094	0.000180664	0.0169021	NA	NA	NA
cg11292440	SFMBT2	57713	10	7409618	-3.78989	0.000181394	0.0169592	0.223863	0.823014	1.00081
cg14550457		0	19	23084806	-3.78945	0.0001817	0.0169767	NA	NA	NA
cg09499856	PLCXD3	345557	5	41510325	-3.78903	0.000181995	0.0169931	2.16481	0.0311799	0.608159
cg21836586	TBPL2	387332	14	55907198	-3.78794	0.000182755	0.0170529	-0.378254	0.705506	1.01162
cg01277511	SSTR4	6754	20	23016753	-3.7861	0.000184053	0.0171627	-0.368246	0.712946	1.01155
cg02022294	TUBB3	10381	16	90001882	-3.78581	0.000184261	0.0171709	0.352871	0.72443	1.01061
cg11633916		0	10	134831791	-3.78509	0.000184768	0.0172069	NA	NA	NA
cg14958635	NEUROG1	4762	5	134870977	-3.78487	0.000184927	0.0172104	-0.638271	0.523778	1.00988
cg24792289		0	5	134825895	-3.78471	0.000185042	0.0172099	NA	NA	NA
cg23466623		0	2	111982296	-3.78417	0.000185422	0.017234	NA	NA	NA
cg03452623		0	4	187889614	-3.78403	0.000185524	0.0172322	NA	NA	NA
cg22478121	OSR1	130497	2	19556066	-3.78398	0.000185558	0.0172241	-1.02567	0.305863	0.987762
cg01558931		0	5	72676121	-3.78396	0.000185575	0.0172145	NA	NA	NA
cg09767822	DBX1	120237	11	20178040	-3.78387	0.000185636	0.0172089	-0.428425	0.668645	1.0151
cg16791686	GLTSCR2	29997	19	48249014	-3.78252	0.000186603	0.0172873	0.96998	0.332827	0.991781
cg01425746	CHST1	8534	11	45671369	-3.78238	0.000186702	0.0172852	0.145009	0.8848	0.996204
cg15617814	NTM	50863	11	131780492	-3.78176	0.000187151	0.0173155	-0.438121	0.66161	1.01676
cg15554678	psiTPTE22	387590	22	17083563	-3.781	0.000187691	0.0173542	-0.424815	0.671272	1.0148
cg06458527		0	9	38488283	-3.78068	0.000187925	0.0173646	NA	NA	NA
cg17070108	AICDA	57379	12	8758006	-3.78035	0.000188165	0.0173755	0.634049	0.526526	1.00995
cg24989962	PTGDR	5729	14	52734286	-3.7802	0.000188268	0.0173625	-0.771217	0.441177	1.00378
cg27305357	PCDHGA4;PCDHGA6;PCDHGA1;PCDHGA5;PCDHGB1;PCDHGB4;PCDHGA3;PCDHGA2;PCDHGA8;PCDHGA7;PCDHGB2;PCDHGB3	56111	5	140773864	-3.7802	0.000188268	0.0173625	-0.378441	0.705367	1.01171
cg02964065	HLA-DQB2	3120	6	32729545	-3.78007	0.000188365	0.0173602	-1.44186	0.150372	0.907328
cg05135499		0	10	21798698	-3.78005	0.000188378	0.0173502	NA	NA	NA
cg03613782		0	15	29077505	-3.77954	0.00018875	0.0173732	NA	NA	NA
cg01671587		0	15	29077559	-3.77906	0.000189099	0.0173941	NA	NA	NA
cg06804433	TFAP2D	83741	6	50682485	-3.77879	0.000189292	0.0174006	-0.285624	0.775361	1.00246
cg08837627		0	19	22715300	-3.77836	0.000189604	0.017418	NA	NA	NA
cg15363333	PGBD5	79605	1	230468611	-3.77672	0.0001908	0.0175166	-0.475837	0.634532	1.01562
cg25371634	HOXD10	3236	2	176981422	-3.77637	0.000191056	0.0175288	-2.03216	0.0430067	0.673683
cg01489057	DMBT1	1755	10	124402673	-3.77516	0.000191942	0.0175987	-1.00271	0.316797	0.988959
cg24947371	GPR133	283383	12	131488726	-3.77416	0.000192681	0.0176551	1.205	0.229142	0.969807
cg12965464	S1PR2	9294	19	10335237	-3.77349	0.000193181	0.0176895	1.17654	0.2403	0.974023
cg24150032		0	10	1219405	-3.77306	0.000193495	0.0177069	NA	NA	NA
cg14470895	CDO1	1036	5	115152431	-3.77289	0.000193621	0.0177071	2.47709	0.0137894	0.437114
cg21618418		0	18	77591684	-3.77279	0.000193694	0.0177024	NA	NA	NA
cg18479593		0	14	57265560	-3.77277	0.000193708	0.0176923	NA	NA	NA
cg03494825		0	8	832260	-3.77273	0.000193744	0.0176842	NA	NA	NA
cg04696808		0	16	34257170	-3.77256	0.000193864	0.0176838	NA	NA	NA
cg09643544	ZNF177	7730	19	9473696	-3.77231	0.000194055	0.0176899	0.562576	0.574138	1.0118
cg11477414		0	17	81052622	-3.77143	0.00019471	0.0177383	NA	NA	NA
cg06584329		0	21	47457375	-3.77092	0.000195086	0.0177612	NA	NA	NA
cg09295573	KIAA1239	57495	4	37245514	-3.77088	0.000195117	0.0177527	-0.515766	0.606393	1.01481
cg09093858	RGS22	26166	8	101117952	-3.76783	0.00019741	0.0179384	1.05216	0.293561	0.982391
cg13877482	LHX4	89884	1	180202256	-3.76722	0.00019787	0.0179687	2.39776	0.0170986	0.474727
cg05474265		0	4	81128398	-3.76644	0.000198465	0.0180112	NA	NA	NA
cg06498145		0	6	170529928	-3.76608	0.000198739	0.0180246	NA	NA	NA
cg25884550	PABPC1P2	728773	2	147344914	-3.76568	0.000199039	0.0180403	1.18399	0.23734	0.970429
cg13510429	PDZD4	57595	X	153094195	-3.76564	0.000199068	0.0180315	-0.240507	0.810099	1.00083
cg27340506	PSKH2	85481	8	87082045	-3.7653	0.000199327	0.0180435	-0.154214	0.877544	0.995552
cg19718563		0	19	37266748	-3.76381	0.000200467	0.0181351	NA	NA	NA
cg17481197	PHYHIP	9796	8	22079107	-3.7635	0.000200703	0.018145	-0.817813	0.414104	1.00707
cg26921482	AMDHD2	51005	16	2570283	-3.76333	0.00020084	0.0181343	0.644187	0.51994	1.00993
cg11943209	OSR1	130497	2	19553321	-3.76288	0.000201186	0.0181425	-1.02567	0.305863	0.987762
cg11376227	ALPK1	80216	4	113333069	-3.76098	0.000202647	0.0182512	-0.0381894	0.969562	0.994715
cg08065231	ZNF177	7730	19	9473684	-3.76076	0.000202816	0.0182433	0.562576	0.574138	1.0118
cg19267776		0	8	1105283	-3.75957	0.000203743	0.0183151	NA	NA	NA
cg13073870	TMCC2	9911	1	205210842	-3.75912	0.000204095	0.0183352	1.08652	0.278108	0.97731
cg19849151	ATP2A3	489	17	3850942	-3.75889	0.000204269	0.0183393	-0.0827249	0.934125	0.995605
cg01729977	PCDHGA4;PCDHGA11;PCDHGA9;PCDHGA1;PCDHGB1;PCDHGB6;PCDHGB3;PCDHGB7;PCDHGA6;PCDHGA8;PCDHGA10;PCDHGA5;PCDHGB4;PCDHGA3;PCDHGA2;PCDHGB2;PCDHGA7;PCDHGB5	56111	5	140802831	-3.75816	0.000204846	0.0183795	-0.378441	0.705367	1.01171
cg22127730	CAMTA1	23261	1	7724533	-3.75762	0.000205266	0.018394	-0.748709	0.454611	1.0035
cg00455535	FAT3	120114	11	92616319	-3.7576	0.000205282	0.0183838	0.0421382	0.966416	0.994529
cg25110932	CDH4	1002	20	60503451	-3.75729	0.000205522	0.0183938	-0.109093	0.913201	0.993451
cg23479922	2018-03-11	0	5	16179633	-3.7569	0.000205831	0.0184098	-0.292169	0.770357	1.00333
cg00742472		0	14	31889912	-3.75664	0.000206034	0.0184164	NA	NA	NA
cg25280791		0	19	22320869	-3.7563	0.000206305	0.0184291	NA	NA	NA
cg09286493	ODZ4	26011	11	78387387	-3.75551	0.000206927	0.0184731	-0.711438	0.477358	1.00384
cg26646558		0	16	34441787	-3.75506	0.00020728	0.018493	NA	NA	NA
cg16200879	STAP2	55620	19	4326975	-3.7544	0.000207807	0.0185284	-1.69501	0.0910976	0.831989
cg05201970	HCN1	348980	5	45696206	-3.75381	0.000208275	0.0185469	-0.472337	0.637025	1.01542
cg09119043	SLC35F3	148641	1	234367443	-3.75379	0.000208289	0.0185365	0.368387	0.712841	1.01147
cg05694749	FAT3	120114	11	92616492	-3.75378	0.000208293	0.0185253	0.0421382	0.966416	0.994529
cg20256804	DIP2C	22982	10	444983	-3.75177	0.000209898	0.0186448	-3.06797	0.00234923	0.151563
cg25691167	FERD3L	222894	7	19184961	-3.75121	0.000210346	0.0186729	-0.161784	0.871583	0.996258
cg08211028		0	10	109674963	-3.75002	0.000211308	0.0187466	NA	NA	NA
cg01703971	FBLN7	129804	2	112917424	-3.74926	0.000211918	0.0187891	-2.13906	0.0332275	0.622173
cg16075641	FAM46D	169966	X	79591006	-3.74864	0.000212416	0.0188215	7.1214	7.75527e-12	3.90264e-09
cg06870531	ATP10A	57194	15	25959061	-3.7486	0.000212454	0.0188131	0.29381	0.769103	1.00345
cg14399122	COL5A1	1289	9	137660670	-3.74773	0.000213156	0.0188636	0.00293399	0.997661	0.999249
cg08942772	FAM129C	199786	19	17651048	-3.74746	0.000213373	0.0188711	2.35892	0.0189607	0.498903
cg07836478		0	18	15330632	-3.7468	0.000213911	0.0189069	NA	NA	NA
cg03298073		0	1	209404846	-3.7462	0.000214403	0.0189386	NA	NA	NA
cg24290751	MYOM2	9172	8	2003835	-3.74495	0.000215423	0.0190051	0.454764	0.649603	1.01655
cg15798890	NFATC1	4772	18	77180674	-3.74446	0.000215828	0.0190291	-1.28061	0.201305	0.94741
cg23629183	MINA	84864	3	97691400	-3.74405	0.000216169	0.0190474	1.3453	0.179532	0.932593
cg06363516	CAPN10	11132	2	241530274	-3.74366	0.000216487	0.0190636	0.587368	0.557392	1.01042
cg09470274		0	6	28584057	-3.7435	0.00021662	0.0190635	NA	NA	NA
cg00574563	LHX1	3975	17	35299270	-3.74191	0.000217936	0.0191675	-0.921608	0.357464	0.995075
cg10668198	NUDT9P1	119369	10	92913693	-3.74054	0.000219077	0.0192559	-0.482578	0.629743	1.0162
cg19237063	PTPRN2	5799	7	157666168	-3.73939	0.00022003	0.0193278	0.197306	0.84372	0.998721
cg06404334		0	9	133534535	-3.73919	0.000220201	0.0193309	NA	NA	NA
cg26674331		0	X	64771656	-3.73881	0.000220516	0.0193466	NA	NA	NA
cg23808916		0	6	166240875	-3.73881	0.000220518	0.0193348	NA	NA	NA
cg26453012		0	12	74564856	-3.73867	0.000220636	0.0193333	NA	NA	NA
cg08727218		0	6	87832318	-3.73853	0.000220755	0.0193318	NA	NA	NA
cg03158942		0	8	49043527	-3.73808	0.000221133	0.019353	NA	NA	NA
cg08617346		0	20	1716331	-3.738	0.000221203	0.0193472	NA	NA	NA
cg22995587		0	19	57376421	-3.73752	0.000221602	0.0193584	NA	NA	NA
cg04359915	CPN1	1369	10	101825029	-3.73751	0.000221616	0.0193477	-0.460029	0.645824	1.01505
cg03503087	GFRA1	2674	10	118032626	-3.737	0.000222042	0.019373	0.873246	0.383218	0.999067
cg16226261		0	22	49717566	-3.73691	0.000222115	0.0193675	NA	NA	NA
cg01646795		0	7	57324841	-3.73653	0.000222436	0.0193836	NA	NA	NA
cg07279070	EMX1	2016	2	73148229	-3.73536	0.000223433	0.0194586	-0.908271	0.364455	0.997024
cg05544500		0	16	54324346	-3.73497	0.00022376	0.0194752	NA	NA	NA
cg02582514	MIR410;MIR656	574434	14	101532170	-3.73382	0.000224743	0.0195488	NA	NA	NA
cg23701865	DCAF4L2	138009	8	88886301	-3.73344	0.000225069	0.0195652	3.74944	0.000212138	0.022125
cg04858155	ALX4	60529	11	44332369	-3.7332	0.000225272	0.0195709	1.19594	0.232651	0.970377
cg06822229	ACSL4	2182	X	108976856	-3.73301	0.000225432	0.0195609	-2.00559	0.0457858	0.687265
cg04139449		0	6	45631407	-3.73261	0.000225776	0.0195788	NA	NA	NA
cg16262614	TF	7018	3	133464971	-3.73166	0.000226595	0.0196379	0.307809	0.758438	1.0057
cg09234616	WT1	7490	11	32452592	-3.73083	0.000227306	0.0196875	-0.222914	0.823752	1.00038
cg19630374	MYO15A	51168	17	18023558	-3.73031	0.000227758	0.0197147	0.60509	0.545571	1.01028
cg06301252	PTPRN2	5799	7	157504143	-3.7295	0.000228459	0.0197634	0.197306	0.84372	0.998721
cg04389822	SALL3	27164	18	76755488	-3.72897	0.000228918	0.0197911	-1.00805	0.314232	0.989855
cg21230284	FAM53A	152877	4	1660919	-3.72814	0.000229641	0.0198415	0.94387	0.345986	0.991649
cg22042992		0	22	20640123	-3.72777	0.000229965	0.0198575	NA	NA	NA
cg27291304	ZNF208	7757	19	22193479	-3.72766	0.000230055	0.0198532	3.58772	0.000388643	0.0370758
cg01047586		0	2	176933407	-3.7274	0.000230288	0.0198613	NA	NA	NA
cg20777398		0	6	28956244	-3.72724	0.000230424	0.019861	NA	NA	NA
cg05175896	WNT5B	81029	12	1749013	-3.72722	0.000230439	0.0198502	-1.48542	0.138468	0.897078
cg18013730	RASA3	22821	13	114839057	-3.72695	0.000230678	0.0198588	-0.70202	0.483204	1.00573
cg15627277		0	20	61973941	-3.72693	0.000230697	0.0198484	NA	NA	NA
cg22795307		0	2	242519343	-3.72645	0.000231117	0.0198726	NA	NA	NA
cg08582773		0	4	1627356	-3.72612	0.00023141	0.0198858	NA	NA	NA
cg22815582		0	4	189580633	-3.72589	0.000231612	0.0198911	NA	NA	NA
cg20707630		0	15	25018449	-3.72524	0.000232185	0.0199283	NA	NA	NA
cg02724025	CDH11	1009	16	64984700	-3.72522	0.000232195	0.0199172	0.0392196	0.968741	0.994836
cg11447849		0	15	25842111	-3.72412	0.000233169	0.0199887	NA	NA	NA
cg26553789	DLGAP2	9228	8	1616767	-3.72308	0.000234088	0.0200554	-0.286726	0.774518	1.00317
cg00719237	NGFR	4804	17	47583662	-3.7228	0.000234338	0.0200647	-0.24375	0.807589	1.00086
cg03089878	ACOX3	8310	4	8388438	-3.72239	0.000234703	0.0200839	1.55654	0.120621	0.880977
cg07867133		0	18	74325904	-3.72234	0.000234742	0.0200752	NA	NA	NA
cg06575144	C20orf160	140706	20	30618966	-3.72164	0.000235366	0.0201164	0.569677	0.569317	1.01163
cg04714232		0	20	61719054	-3.72155	0.000235449	0.0201115	NA	NA	NA
cg27416372	ZIC4	84107	3	147110229	-3.72072	0.000236194	0.020163	-0.60934	0.542754	1.0099
cg05228964	DLL1	28514	6	170597377	-3.72048	0.000236405	0.0201689	-2.36088	0.0188628	0.498281
cg19777004		0	4	49526489	-3.72033	0.00023654	0.0201684	NA	NA	NA
cg17165218		0	7	63213454	-3.72029	0.000236581	0.0201598	NA	NA	NA
cg20311251	CALHM1	255022	10	105218160	-3.72026	0.000236605	0.0201498	-0.313298	0.754269	1.00594
cg06282524		0	X	139593371	-3.71984	0.000236978	0.0201695	NA	NA	NA
cg16806245	THBS2	7058	6	169649046	-3.71934	0.000237432	0.020196	0.829684	0.407369	1.00514
cg25300390	MAD1L1	8379	7	1976351	-3.71798	0.000238656	0.020288	-0.0907625	0.927741	0.995495
cg07945733	C10orf82	143379	10	118429485	-3.71524	0.000241143	0.020475	3.36572	0.000861455	0.0710665
cg10208132		0	4	16362584	-3.71416	0.000242133	0.0205346	NA	NA	NA
cg09804711		0	20	61403556	-3.71338	0.00024285	0.0205831	NA	NA	NA
cg16926958		0	12	74565116	-3.71279	0.000243391	0.0206167	NA	NA	NA
cg25765464	ZNF536	9745	19	30941858	-3.71133	0.000244734	0.0207181	0.233363	0.815636	1.00146
cg01880176	OPCML	4978	11	133230950	-3.71123	0.00024483	0.020714	0.244579	0.806947	1.00068
cg10776230	KIF26B	55083	1	245851226	-3.71117	0.000244885	0.0207063	-0.39633	0.69214	1.01148
cg23779421		0	18	68098095	-3.70999	0.000245976	0.0207739	NA	NA	NA
cg16002641		0	19	23077008	-3.70978	0.000246174	0.0207783	NA	NA	NA
cg09307985	COX7A1	1346	19	36643070	-3.70941	0.000246521	0.0207952	0.440401	0.65996	1.01718
cg22797450	UNC13A	23025	19	17728459	-3.70898	0.000246916	0.0208162	2.12338	0.0345297	0.627299
cg09404429		0	17	21367130	-3.70892	0.000246979	0.0208092	NA	NA	NA
cg09224821		0	17	80329944	-3.70793	0.0002479	0.0208745	NA	NA	NA
cg23954968		0	11	22454517	-3.70779	0.00024803	0.0208731	NA	NA	NA
cg09936561	DRD5	1816	4	9783623	-3.70772	0.000248102	0.0208668	-0.155324	0.876669	0.995233
cg00599914	PRIC285	85441	20	62197219	-3.70747	0.00024833	0.0208736	-0.952103	0.341801	0.992801
cg09753648		0	16	87251723	-3.70504	0.000250625	0.0210541	NA	NA	NA
cg25501224		0	19	361110	-3.70412	0.000251494	0.0211147	NA	NA	NA
cg11358935		0	2	52857018	-3.70345	0.00025213	0.0211556	NA	NA	NA
cg07919805	BEND7	222389	10	13513915	-3.70342	0.000252155	0.0211452	-1.48486	0.138618	0.896608
cg01737532	FRG1	2483	4	190862170	-3.70327	0.000252305	0.0211454	-0.91995	0.358328	0.995417
cg02741440	PLCXD3	345557	5	41509882	-3.70305	0.000252515	0.0211505	2.16481	0.0311799	0.608159
cg10218546	HLA-DQB2	3120	6	32729823	-3.70272	0.000252828	0.0211643	-1.44186	0.150372	0.907328
cg03430597	COL5A1	1289	9	137660514	-3.70247	0.000253062	0.0211714	0.00293399	0.997661	0.999249
cg27376707	A2BP1	54715	16	6533187	-3.70236	0.000253168	0.0211678	2.8163	0.00517575	0.251042
cg18249908	RHOBTB2	23221	8	22864325	-3.70216	0.000253362	0.0211716	0.0336489	0.973179	0.995079
cg06948989	PCDHB15	56121	5	140627173	-3.70124	0.000254241	0.0212202	0.703934	0.482013	1.00585
cg14910038		0	8	1299149	-3.7008	0.000254666	0.0212308	NA	NA	NA
cg08146323	ZNF835	90485	19	57183118	-3.70061	0.000254841	0.0212329	1.57018	0.117413	0.876959
cg01840128	SLC6A19	340024	5	1207205	-3.70046	0.000254992	0.0212331	-0.456945	0.648037	1.01568
cg08219814		0	8	1327367	-3.70001	0.000255424	0.0212442	NA	NA	NA
cg01561777	TSHZ1	10194	18	72999932	-3.69965	0.000255772	0.0212483	-0.517727	0.605025	1.01471
cg06701529		0	11	32008841	-3.69911	0.000256291	0.021279	NA	NA	NA
cg13462387	APCDD1	147495	18	10471657	-3.69808	0.000257292	0.0213497	-2.73494	0.00660554	0.29287
cg16106297	ZSCAN1	284312	19	58556609	-3.69701	0.000258329	0.0214233	0.0860495	0.931484	0.995584
cg09953406		0	11	134605083	-3.69693	0.000258404	0.021417	NA	NA	NA
cg26204267		0	4	132666925	-3.69507	0.000260224	0.0215553	NA	NA	NA
cg01540953	ODZ2	57451	5	167689737	-3.69481	0.00026048	0.021564	-1.01328	0.311734	0.991294
cg22643760		0	19	36746845	-3.69471	0.000260574	0.0215592	NA	NA	NA
cg16620392		0	10	131765379	-3.69451	0.000260769	0.0215628	NA	NA	NA
cg14093715	LHX2	9355	9	126776180	-3.69435	0.000260934	0.0215639	-1.87589	0.061629	0.7555
cg20450689		0	18	77586147	-3.69406	0.000261217	0.0215748	NA	NA	NA
cg14579314		0	3	99944324	-3.69404	0.000261234	0.0215637	NA	NA	NA
cg06872981		0	1	148864853	-3.69359	0.000261677	0.0215877	NA	NA	NA
cg03216355	KCNH1	3756	1	210857246	-3.69325	0.000262014	0.021603	0.51195	0.609058	1.01496
cg20442503	REXO1;MIR1909	57455	19	1816188	-3.69315	0.00026211	0.0215984	0.577007	0.564362	1.01122
cg13802013		0	20	37303351	-3.69291	0.000262351	0.0216058	NA	NA	NA
cg12341314	ACTA1	58	1	229568467	-3.69228	0.000262973	0.0216445	-0.383889	0.701329	1.01132
cg00157668		0	10	109674526	-3.69153	0.00026372	0.0216934	NA	NA	NA
cg04596004		0	13	112710155	-3.69137	0.000263869	0.0216932	NA	NA	NA
cg20000541	FAM9A	171482	X	8769269	-3.69107	0.000264172	0.0217055	0.434838	0.663988	1.01545
cg06976222		0	1	44569177	-3.69102	0.00026422	0.021697	NA	NA	NA
cg01525538	DUSP5P	574029	1	228785987	-3.6902	0.000265042	0.0217519	-0.648514	0.517142	1.00926
cg00794209		0	8	255189	-3.69011	0.000265128	0.0217465	NA	NA	NA
cg14699728	NPAS4	266743	11	66188522	-3.68982	0.00026542	0.0217579	-0.712435	0.476742	1.00412
cg22351924	IFI6	2537	1	27994914	-3.68967	0.00026557	0.0217576	-1.9137	0.0565978	0.727495
cg03003467	LOC100133469	0	14	106938289	-3.6888	0.000266439	0.0218163	NA	NA	NA
cg15745824		0	6	156952297	-3.68815	0.000267087	0.0218568	NA	NA	NA
cg23332586	FAM19A5	25817	22	49042468	-3.68702	0.000268225	0.0219247	-0.374419	0.708353	1.0121
cg25561762		0	13	20876028	-3.68569	0.000269572	0.0220222	NA	NA	NA
cg09061632		0	14	101923621	-3.68511	0.000270164	0.0220452	NA	NA	NA
cg21748223	NPY5R	4889	4	164264853	-3.68474	0.000270541	0.0220633	1.56035	0.119717	0.877878
cg26585560	FAM135B	51059	8	139509708	-3.68352	0.000271779	0.0221516	2.29239	0.022566	0.537552
cg15126975		0	2	175208605	-3.68342	0.000271883	0.0221474	NA	NA	NA
cg23898073	GFRA1	2674	10	118032948	-3.68306	0.000272249	0.0221646	0.873246	0.383218	0.999067
cg21585045		0	11	114831756	-3.68243	0.000272894	0.0222044	NA	NA	NA
cg19005233	PCDHB15	56121	5	140626445	-3.68213	0.000273205	0.022217	0.703934	0.482013	1.00585
cg02760300	ODZ4	26011	11	78780772	-3.68211	0.000273225	0.0222059	-0.711438	0.477358	1.00384
cg03323437	MAGED2	10916	X	54835446	-3.68198	0.000273357	0.022204	0.72787	0.467253	1.00366
cg20458277		0	8	1053508	-3.68075	0.000274622	0.022294	NA	NA	NA
cg13077138	C15orf2	23742	15	24921183	-3.68036	0.000275027	0.0223142	0.0649655	0.948244	0.992781
cg16396223	PRKAG2	51422	7	151422150	-3.67993	0.000275469	0.0223246	0.0963555	0.923302	0.995241
cg14533651	GRIN2B	2904	12	13715927	-3.67957	0.000275847	0.0223425	1.52355	0.128661	0.883594
cg24814191	APCDD1L	164284	20	57041568	-3.67953	0.000275886	0.022333	-0.789829	0.430243	1.00562
cg16412772		0	8	65500144	-3.67901	0.000276421	0.0223636	NA	NA	NA
cg02128191	DIP2C	22982	10	669285	-3.67876	0.000276682	0.022372	-3.06797	0.00234923	0.151563
cg17453961		0	6	159550256	-3.67745	0.000278051	0.0224699	NA	NA	NA
cg03284640	CHST15	51363	10	125804060	-3.67707	0.00027844	0.0224886	-0.945827	0.344988	0.99303
cg03943674	KCNG2	26251	18	77643329	-3.6763	0.000279244	0.0225407	0.795406	0.426998	1.00916
cg07341007	MUC4	4585	3	195489909	-3.67628	0.000279274	0.0225304	-1.17003	0.242907	0.974
cg02855576	DPP6	1804	7	153749964	-3.67546	0.000280131	0.0225867	0.774997	0.438944	1.00335
cg21542951		0	3	75721434	-3.67518	0.000280423	0.0225975	NA	NA	NA
cg07158230		0	7	63391463	-3.67467	0.000280956	0.0226276	NA	NA	NA
cg00167275	FAM35A;GLUD1	54537	10	88854588	-3.67451	0.000281134	0.0226291	0.801659	0.423377	1.00878
cg17768600	SLC22A3	6581	6	160783945	-3.6743	0.000281351	0.0226338	-0.785696	0.432657	1.00449
cg10186768	NLRC3	197358	16	3613274	-3.67374	0.000281939	0.0226683	-0.195091	0.845452	0.997895
cg07780114	COL6A2	1292	21	47549369	-3.67209	0.000283697	0.0227968	-0.0394091	0.96859	0.994884
cg07281879	WIT1	51352	11	32459626	-3.67165	0.000284159	0.022821	-0.343025	0.731817	1.0093
cg00960419		0	6	170547097	-3.67163	0.000284181	0.0228099	NA	NA	NA
cg06776703	STAP2	55620	19	4328759	-3.6702	0.000285714	0.0229201	-1.69501	0.0910976	0.831989
cg16023283	LOC100133469	0	14	106938234	-3.66894	0.000287058	0.0230149	NA	NA	NA
cg15255946	HLA-DQB2	3120	6	32729563	-3.66891	0.000287092	0.0230047	-1.44186	0.150372	0.907328
cg08502239	RCVRN	5957	17	9808122	-3.66875	0.000287268	0.0230058	1.57257	0.116858	0.877375
cg13167518		0	7	56855146	-3.66824	0.000287813	0.0230236	NA	NA	NA
cg07156138	ADARB2	105	10	1744124	-3.66812	0.000287948	0.0230215	-1.16101	0.246547	0.973279
cg02189843	S1PR5	53637	19	10625775	-3.66804	0.000288029	0.023015	-0.806462	0.420607	1.00838
cg00369477	HTR2C	3358	X	113818635	-3.66654	0.000289649	0.0231315	1.19303	0.23379	0.9705
cg04240471	EIF3B	8662	7	2420162	-3.66575	0.000290507	0.023187	-0.801845	0.423269	1.00888
cg19291056		0	8	989168	-3.66555	0.000290723	0.0231912	NA	NA	NA
cg04217706		0	12	126676139	-3.66549	0.000290793	0.0231838	NA	NA	NA
cg16196812	PRLHR	2834	10	120355139	-3.66521	0.0002911	0.0231953	1.25305	0.211151	0.956187
cg27072251		0	13	112669429	-3.66508	0.000291235	0.0231931	NA	NA	NA
cg22117642	PCDHA2;PCDHA1;PCDHA4;PCDHA3	56146	5	140188757	-3.6649	0.00029144	0.0231964	1.60894	0.108667	0.860146
cg00748144		0	X	124454052	-3.66426	0.000292131	0.0232385	NA	NA	NA
cg26032161		0	X	119866832	-3.66398	0.000292444	0.0232504	NA	NA	NA
cg03559568	DNAJB6	10049	7	157208968	-3.66261	0.00029394	0.0233563	0.130826	0.896	0.994463
cg18794475	RP1	6101	8	55533829	-3.66251	0.000294048	0.0233518	0.9493	0.343222	0.99306
cg23825213	KCNG2	26251	18	77623475	-3.6625	0.000294069	0.0233405	0.795406	0.426998	1.00916
cg26018312	SRD5A1P1	6719	X	138529149	-3.6624	0.000294176	0.0233359	NA	NA	NA
cg13000039	OBSL1	23363	2	220428227	-3.66238	0.000294195	0.0233245	-0.125966	0.899842	0.994833
cg20926353	TLE1	7088	9	84303358	-3.66231	0.000294273	0.0233177	1.53252	0.126434	0.882143
cg26673012	TBX20	57057	7	35293753	-3.66217	0.000294426	0.0233168	3.69508	0.000260639	0.0261015
cg21330207	ZADH2	284273	18	72916311	-3.66209	0.000294519	0.0233112	-1.371	0.171387	0.927129
cg03658371	KCNH6	81033	17	61613152	-3.66185	0.000294784	0.0233063	0.827058	0.408853	1.00535
cg07932899	TPO	7173	2	1480789	-3.66145	0.000295225	0.0233282	-0.466694	0.641053	1.01469
cg17822947	CR1L	1379	1	207842917	-3.66126	0.000295433	0.0233317	-0.452929	0.650923	1.0164
cg06355467		0	5	180876284	-3.66071	0.00029604	0.0233666	NA	NA	NA
cg00762185	DIO3	1735	14	102028737	-3.66043	0.000296351	0.0233782	-1.29625	0.195873	0.943689
cg24538512	NFATC1	4772	18	77233465	-3.6594	0.000297494	0.0234554	-1.28061	0.201305	0.94741
cg17339956	C3orf77	375337	3	44283355	-3.65827	0.000298756	0.0235419	-0.207023	0.836131	0.999019
cg24945701		0	3	62362783	-3.65761	0.000299491	0.0235737	NA	NA	NA
cg04352272		0	17	3289798	-3.65676	0.000300442	0.0236355	NA	NA	NA
cg24035043	HHIPL1	84439	14	100119095	-3.65672	0.000300486	0.0236259	0.0261281	0.979172	0.996348
cg17310258		0	11	31847173	-3.65603	0.000301258	0.0236735	NA	NA	NA
cg24205065		0	11	50238107	-3.65586	0.000301454	0.0236759	NA	NA	NA
cg17870945	ELFN2	114794	22	37770344	-3.65559	0.000301758	0.0236867	0.355981	0.722102	1.01044
cg09636202		0	7	56243297	-3.65511	0.000302301	0.0237162	NA	NA	NA
cg15435932	LOC388946	0	2	46707626	-3.6551	0.000302309	0.0237038	NA	NA	NA
cg10786489	SLC8A2	6543	19	47969296	-3.65449	0.000302996	0.0237446	2.22756	0.0266415	0.566878
cg27500798	SLC18A3;CHAT	6572	10	50817096	-3.65427	0.00030325	0.0237514	0.590992	0.554965	1.0103
cg01119777		0	10	11936173	-3.65418	0.000303347	0.0237459	NA	NA	NA
cg08235551		0	22	49798682	-3.65382	0.000303759	0.0237651	NA	NA	NA
cg11228052	ASCL1	429	12	103350170	-3.65369	0.00030391	0.0237639	1.43568	0.152121	0.911053
cg09241718		0	4	132898790	-3.65316	0.000304505	0.0237843	NA	NA	NA
cg27145740	PLXNB2	23654	22	50725817	-3.65235	0.00030543	0.0238435	-0.966328	0.334648	0.991775
cg15575875		0	1	85220088	-3.65224	0.00030555	0.0238398	NA	NA	NA
cg13188098	KCNA6	3742	12	4918335	-3.65187	0.000305975	0.0238598	0.0474456	0.962189	0.993787
cg04258973	IGFN1	91156	1	201196147	-3.65157	0.00030632	0.0238606	0.291132	0.771149	1.00333
cg09900371	DLL4	54567	15	41228628	-3.65008	0.000308031	0.0239808	0.32322	0.746751	1.00659
cg01337391		0	16	54324358	-3.65007	0.000308038	0.0239682	NA	NA	NA
cg08477528	DSCAML1	57453	11	117651217	-3.64916	0.000309082	0.0240363	0.701804	0.483338	1.00559
cg08512167	PPP1R13L	10848	19	45901567	-3.64903	0.000309232	0.0240349	-0.532278	0.594922	1.01279
cg04291079	MEG3	55384	14	101294430	-3.64865	0.000309672	0.0240559	1.35845	0.17533	0.929229
cg22428762	DCAF4L1	285429	4	41984085	-3.64705	0.000311532	0.0241872	1.63063	0.104004	0.84586
cg20011604	TUBA3C	7278	13	19751301	-3.64616	0.000312559	0.0242537	5.39362	1.38994e-07	3.07452e-05
cg16733813	MRPL55	128308	1	228295568	-3.64612	0.000312612	0.0242446	0.753667	0.451633	1.00363
cg02902969	DIP2C	22982	10	409431	-3.64569	0.000313114	0.0242703	-3.06797	0.00234923	0.151563
cg06516800	BCL2L12	83596	19	50173402	-3.64558	0.000313233	0.0242664	0.300323	0.764136	1.00426
cg15966877	UNC13A	23025	19	17758119	-3.64449	0.000314515	0.0243392	2.12338	0.0345297	0.627299
cg24360871	HOXA3	3200	7	27163929	-3.64379	0.00031534	0.0243898	-1.73081	0.0844998	0.819314
cg03692651		0	19	22444593	-3.64375	0.000315383	0.0243799	NA	NA	NA
cg22964918	EVX1	2128	7	27286075	-3.64351	0.000315661	0.0243881	-0.761959	0.446675	1.00359
cg08103144	SYNPO	11346	5	150028986	-3.64342	0.000315765	0.0243829	0.170589	0.86466	0.996208
cg01159576	LMX1B	4010	9	129386206	-3.6432	0.000316022	0.0243895	-1.03172	0.303022	0.986818
cg07887243	MAOB	4129	X	43741530	-3.64319	0.000316045	0.0243781	0.382859	0.702092	1.01141
cg09322655	CHRNB2	1141	1	154544294	-3.64294	0.000316329	0.0243868	0.641138	0.521916	1.00967
cg13924326	KCNT1	57582	9	138670828	-3.64213	0.000317294	0.0244479	0.863576	0.388502	1.00194
cg11091196	ODZ2	57451	5	167285540	-3.64192	0.000317533	0.0244531	-1.01328	0.311734	0.991294
cg18997701	PPP2R5C	5527	14	102358022	-3.64027	0.000319489	0.0245905	-0.635429	0.525627	1.01006
cg18016194	RALYL	138046	8	85097157	-3.63979	0.000320072	0.024622	0.406279	0.684823	1.01262
cg20384941	FLI1	2313	11	128680482	-3.63955	0.000320346	0.0246298	-0.34266	0.732091	1.0092
cg21610508		0	19	388335	-3.63882	0.000321229	0.0246844	NA	NA	NA
cg12412598		0	12	132939165	-3.63813	0.000322048	0.0247339	NA	NA	NA
cg23832237	RAB37	326624	17	72667208	-3.63749	0.000322818	0.0247797	-0.971979	0.331834	0.990875
cg10264692		0	20	61314827	-3.63712	0.000323263	0.0248005	NA	NA	NA
cg08279055	LOC388946	0	2	46707678	-3.63564	0.00032505	0.0249242	NA	NA	NA
cg19939124	MAD1L1	8379	7	2026965	-3.63541	0.00032532	0.0249315	-0.0907625	0.927741	0.995495
cg16401173	CDH15	1013	16	89245911	-3.63535	0.000325391	0.0249235	0.93531	0.350371	0.993046
cg00665816	APBA1	320	9	72131278	-3.6347	0.000326184	0.0249708	1.13957	0.255361	0.974625
cg13990685		0	12	128245617	-3.63335	0.00032783	0.0250833	NA	NA	NA
cg24005949	CSMD2	114784	1	34090758	-3.63287	0.000328403	0.0251137	0.0597476	0.952396	0.993305
cg26014373	OLFML2A	169611	9	127572640	-3.63193	0.000329557	0.0251884	-1.09613	0.273889	0.978716
cg04278168		0	10	124578263	-3.6319	0.0003296	0.0251782	NA	NA	NA
cg15852891	OTP	23440	5	76934946	-3.63185	0.000329651	0.0251685	0.969481	0.333076	0.992081
cg08007647	C1orf146	388649	1	92683675	-3.63155	0.000330019	0.0251831	1.11721	0.264787	0.977247
cg07053177	TMEM132C	92293	12	128899814	-3.63	0.000331923	0.0253149	-0.736513	0.461987	1.00241
cg01228667	GPR101	83550	X	136114207	-3.62998	0.000331958	0.025304	-0.150838	0.880204	0.995876
cg12487901	PCDHGA4;PCDHGC3;PCDHGA12;PCDHGA11;PCDHGA9;PCDHGA1;PCDHGB1;PCDHGB6;PCDHGB3;PCDHGB7;PCDHGA6;PCDHGA8;PCDHGA10;PCDHGA5;PCDHGB4;PCDHGC4;PCDHGA3;PCDHGA2;PCDHGA7;PCDHGB2;PCDHGC5;PCDHGB5	56111	5	140872334	-3.62991	0.000332039	0.0252966	-0.378441	0.705367	1.01171
cg02602411	GRIN3A;PPP3R2	116443	9	104357177	-3.62801	0.000334388	0.0254619	1.10935	0.268154	0.976602
cg23445321	SLC35F3	148641	1	234367493	-3.62787	0.000334563	0.0254617	0.368387	0.712841	1.01147
cg27176628	FRMD1	79981	6	168476656	-3.62706	0.000335567	0.0255108	1.28185	0.200871	0.946915
cg06421751	MYOM2	9172	8	2003997	-3.62634	0.000336464	0.0255653	0.454764	0.649603	1.01655
cg07469929	MYT1	4661	20	62810206	-3.62587	0.000337052	0.0255964	-0.0498112	0.960306	0.993574
cg10375870		0	X	152538680	-3.62558	0.000337415	0.0256103	NA	NA	NA
cg14930706	NLRP4	147945	19	56363105	-3.62524	0.000337847	0.0256294	8.88484	5.73579e-17	4.81065e-14
cg21161187	SLC6A3	6531	5	1416793	-3.62505	0.000338089	0.0256341	2.88434	0.00420253	0.218586
cg18933620		0	18	77410184	-3.62495	0.000338211	0.0256297	NA	NA	NA
cg16236688		0	10	9450208	-3.62434	0.000338977	0.0256741	NA	NA	NA
cg09771183		0	16	89144455	-3.62375	0.000339715	0.0257163	NA	NA	NA
cg08534830		0	18	75886680	-3.62369	0.000339789	0.0257082	NA	NA	NA
cg10093103		0	14	102101288	-3.62369	0.000339799	0.0256953	NA	NA	NA
cg22898362	KLK9;KLK8	284366	19	51506358	-3.62321	0.000340396	0.0257268	0.767514	0.443372	1.00333
cg19529709	TOP1P2;PIWIL3	7152	22	25160075	-3.62231	0.000341542	0.0257997	-1.40305	0.161623	0.919793
cg18313661		0	7	63560590	-3.62083	0.000343421	0.0259279	NA	NA	NA
cg25095973	GDF2	2658	10	48413850	-3.62009	0.000344362	0.0259852	-0.140671	0.888223	0.996658
cg21214293		0	5	145713882	-3.6194	0.000345244	0.0260379	NA	NA	NA
cg15055149		0	16	34208209	-3.61835	0.000346581	0.0261249	NA	NA	NA
cg05113373	LMF1	64788	16	962823	-3.61741	0.000347799	0.0262029	1.12079	0.263262	0.976452
cg17638856	DLGAP2	9228	8	1617868	-3.61723	0.000348022	0.0262058	-0.286726	0.774518	1.00317
cg11795276	FLJ12825	440101	12	54454252	-3.61699	0.000348341	0.026216	-0.0381987	0.969554	0.994758
cg05196026	FGF13	2258	X	137793096	-3.61583	0.000349839	0.0263148	0.761459	0.446973	1.00325
cg27393010		0	7	121940216	-3.61578	0.000349902	0.0263056	NA	NA	NA
cg24263062	EBF4	57593	20	2730191	-3.61492	0.000351016	0.0263616	-2.43575	0.0154355	0.459616
cg04644653	ZBTB7C	201501	18	45555645	-3.61487	0.000351076	0.0263522	-0.817893	0.414059	1.00708
cg14749638	ANKRD30A	91074	10	37414733	-3.61469	0.000351313	0.0263561	-0.22939	0.81872	1.00122
cg01859340		0	18	44775576	-3.61377	0.000352507	0.0264317	NA	NA	NA
cg08567947		0	2	241097440	-3.61283	0.000353739	0.0265101	NA	NA	NA
cg22851295	GCM2	9247	6	10881949	-3.61248	0.000354195	0.0265303	1.96726	0.0500618	0.701737
cg26355755		0	1	149156606	-3.61225	0.000354497	0.026539	NA	NA	NA
cg05472349		0	17	51834899	-3.61211	0.000354686	0.0265392	NA	NA	NA
cg10421691		0	X	45241425	-3.61176	0.000355139	0.0265591	NA	NA	NA
cg14685796		0	5	50265660	-3.61126	0.000355795	0.0265942	NA	NA	NA
cg14249808	QSOX2	169714	9	139128417	-3.61099	0.000356158	0.0266074	1.64769	0.100449	0.845646
cg13019868		0	11	128694101	-3.61087	0.00035631	0.0266048	NA	NA	NA
cg27049194	COL6A3	1293	2	238280612	-3.61071	0.000356528	0.0266071	0.199596	0.84193	0.99954
cg15006869	FAM19A5	25817	22	49141173	-3.61057	0.000356716	0.0266072	-0.374419	0.708353	1.0121
cg19761682	DMBT1	1755	10	124402817	-3.61037	0.000356971	0.0266123	-1.00271	0.316797	0.988959
cg27025758	TUBE1;C6orf225	51175	6	112408447	-3.60939	0.000358268	0.026695	1.06034	0.289832	0.982323
cg17623854		0	10	134791660	-3.60916	0.000358571	0.0267036	NA	NA	NA
cg25553924	ZNF280C	55609	X	129402544	-3.60895	0.000358859	0.0267111	0.500464	0.617111	1.01544
cg22121237	KCND2	3751	7	119915258	-3.6082	0.000359845	0.0267705	0.955995	0.339835	0.9921
cg21519787	SPHK2	56848	19	49133421	-3.60789	0.00036026	0.0267874	2.04186	0.0420288	0.668772
cg07416427	WWC3	55841	X	10085204	-3.60686	0.000361631	0.0268753	-0.410451	0.681764	1.01308
cg09819081	GPR112	139378	X	135382647	-3.60669	0.000361857	0.026878	0.799018	0.424904	1.00955
cg04768697	CCDC105	126402	19	15122135	-3.60638	0.000362273	0.0268949	-0.149022	0.881635	0.995593
cg16929012	BPHL	670	6	3140784	-3.6054	0.000363591	0.0269787	0.757195	0.44952	1.00303
cg18786873	ALX3	257	1	110610899	-3.60518	0.000363889	0.0269867	1.16501	0.244929	0.972423
cg02698926	SDK1	221935	7	4304018	-3.60493	0.000364222	0.0269974	-1.45431	0.146893	0.902016
cg06614044	SETBP1	26040	18	42324631	-3.60344	0.000366237	0.0271326	-0.0918925	0.926844	0.995435
cg09687738	HTR2C	3358	X	113818934	-3.60315	0.000366629	0.0271475	1.19303	0.23379	0.9705
cg05673204	ODZ3	10178	4	183721729	-3.6014	0.000369003	0.0272807	1.62645	0.10489	0.847926
cg05820107	C1orf65	164127	1	223567949	-3.60133	0.000369096	0.0272735	-0.263028	0.792707	1.00134
cg17675604		0	21	15035944	-3.6003	0.000370505	0.0273634	NA	NA	NA
cg06554342	ZFYVE28	57732	4	2277752	-3.60016	0.000370696	0.0273633	-0.378401	0.705397	1.01154
cg22019065	UNC80	285175	2	210674029	-3.59899	0.000372295	0.0274529	0.632578	0.527485	1.00996
cg01390039		0	16	89315293	-3.59863	0.000372793	0.0274753	NA	NA	NA
cg07083023	NRXN1	9378	2	51254981	-3.59862	0.000372803	0.0274619	-0.845679	0.398397	1.00342
cg14004557		0	11	43543895	-3.5982	0.000373382	0.0274903	NA	NA	NA
cg04507915	TRIM71	131405	3	32861407	-3.59795	0.00037373	0.0275017	-0.0412397	0.967132	0.994503
cg04907257	ADCY2	108	5	7395318	-3.5972	0.000374753	0.0275627	-0.403899	0.686571	1.01208
cg27363141	RNF39	80352	6	30038929	-3.59676	0.000375361	0.0275932	-0.0971451	0.922675	0.995099
cg15002580		0	8	98636815	-3.59643	0.000375818	0.0276125	NA	NA	NA
cg10617192	MTUS2	23281	13	29914097	-3.59633	0.000375964	0.027609	0.757602	0.449276	1.00338
cg15089219	C1QL2	165257	2	119915368	-3.5957	0.000376831	0.0276584	0.339316	0.734606	1.00872
cg02069715	GABRG3	2567	15	27215962	-3.5945	0.000378506	0.0277671	-0.170717	0.86456	0.996206
cg26422472	FLI1	2313	11	128680412	-3.59439	0.000378667	0.0277646	-0.34266	0.732091	1.0092
cg03174507		0	10	21789582	-3.59386	0.000379403	0.0278042	NA	NA	NA
cg16252727	DMRTB1	63948	1	53925658	-3.59371	0.000379609	0.027805	-0.370091	0.711572	1.01131
cg16451909		0	8	957083	-3.59322	0.00038029	0.0278406	NA	NA	NA
cg17806623	KL	9365	13	33590002	-3.59115	0.000383209	0.0280254	-1.09366	0.274971	0.979455
cg17326555		0	1	119535693	-3.59108	0.000383312	0.0280186	NA	NA	NA
cg02589067		0	7	56885977	-3.59079	0.000383711	0.0280333	NA	NA	NA
cg11780005		0	7	56891746	-3.59063	0.000383934	0.0280353	NA	NA	NA
cg07485417	NPM2	10361	8	21882851	-3.58955	0.00038547	0.028133	-1.94375	0.0528478	0.717311
cg08023527	RFX2	5990	19	5994823	-3.58804	0.000387623	0.0282756	-0.177897	0.858923	0.997131
cg23786625	SORCS3	22986	10	106402741	-3.58741	0.000388517	0.0283263	0.570216	0.568952	1.01197
cg06502165	LATS2	26524	13	21562238	-3.58615	0.000390317	0.028443	-1.11597	0.265318	0.976342
cg20848785	VIPR2	7434	7	158886401	-3.58571	0.000390955	0.0284749	-0.482583	0.629739	1.01628
cg27334938	NFATC1	4772	18	77167042	-3.58569	0.000390986	0.0284626	-1.28061	0.201305	0.94741
cg04014726	PXDN	7837	2	1652480	-3.5847	0.000392404	0.0285513	-0.274419	0.783949	1.00242
cg05832050		0	4	187887742	-3.5845	0.000392694	0.0285578	NA	NA	NA
cg14223293		0	5	3602272	-3.58446	0.00039276	0.028548	NA	NA	NA
cg03489023	OSR1	130497	2	19557201	-3.5844	0.000392841	0.0285393	-1.02567	0.305863	0.987762
cg24430140		0	19	57276642	-3.58373	0.000393808	0.028595	NA	NA	NA
cg05716724	XKR4;SBF1P1	114786	8	56362167	-3.58357	0.000394045	0.0285976	-0.610722	0.54184	1.01035
cg10516766		0	11	23752222	-3.58354	0.000394083	0.0285858	NA	NA	NA
cg00236601		0	19	36746737	-3.58321	0.000394561	0.0286059	NA	NA	NA
cg12777862		0	16	31548756	-3.58318	0.0003946	0.0285941	NA	NA	NA
cg18764240	FAM47C	442444	X	37028611	-3.58307	0.000394766	0.0285916	3.25243	0.00127294	0.0952531
cg25528709	SLC12A7	10723	5	1080273	-3.58293	0.000394962	0.0285913	-0.527101	0.598508	1.01306
cg16694007		0	17	53638692	-3.58287	0.000395059	0.0285838	NA	NA	NA
cg21252282		0	9	90439702	-3.58146	0.000397107	0.0287028	NA	NA	NA
cg17516455	EBF3	253738	10	131638824	-3.58104	0.000397714	0.0287321	0.910636	0.363208	0.996324
cg19928377	PCDHA6;PCDHA2;PCDHA1;PCDHA9;PCDHA7;PCDHA5;PCDHA11;PCDHA10;PCDHA3;PCDHA4;PCDHA8	56142	5	140249735	-3.58028	0.000398834	0.0287984	0.115675	0.907986	0.995797
cg23553867		0	18	74325812	-3.57991	0.000399381	0.0288232	NA	NA	NA
cg20731469	NR2E1	7101	6	108495678	-3.57988	0.000399417	0.0288112	0.426675	0.669918	1.01481
cg11547104	SORCS2	57537	4	7593493	-3.57928	0.000400306	0.0288607	-0.428551	0.668554	1.01519
cg11973479		0	7	19152073	-3.57919	0.000400435	0.0288554	NA	NA	NA
cg07908805	SHC2	25759	19	427022	-3.57826	0.000401803	0.0289394	0.848998	0.396551	1.00342
cg18947437	ADARB2	105	10	1231002	-3.57766	0.000402693	0.0289888	-1.16101	0.246547	0.973279
cg15258649	C18orf1	753	18	13262344	-3.57635	0.000404625	0.0291132	-1.1759	0.240553	0.974266
cg15837212		0	1	63795970	-3.57633	0.000404656	0.0291007	NA	NA	NA
cg04481126	TMEM8A	58986	16	423872	-3.57528	0.000406213	0.0291685	-0.769529	0.442177	1.00379
cg07002295	SSTR3	6753	22	37603582	-3.57503	0.000406596	0.0291813	2.29989	0.022132	0.534808
cg03039002		0	13	53776259	-3.57488	0.000406817	0.0291824	NA	NA	NA
cg16024318	SLC6A7	6534	5	149569810	-3.57469	0.000407099	0.0291879	-0.606212	0.544827	1.01011
cg23019889		0	1	146544044	-3.57466	0.000407144	0.0291765	NA	NA	NA
cg11294692	SLC24A4	123041	14	92790711	-3.57401	0.000408115	0.0292313	0.840874	0.40108	1.00302
cg05378963		0	X	38115545	-3.57373	0.000408541	0.0292471	NA	NA	NA
cg27577720		0	12	128245658	-3.5737	0.000408574	0.0292348	NA	NA	NA
cg21137236	ALPK1	80216	4	113333072	-3.57238	0.000410557	0.0293472	-0.0381894	0.969562	0.994715
cg11987316		0	13	25292949	-3.57221	0.000410818	0.0293511	NA	NA	NA
cg20263510	SORCS2	57537	4	7666259	-3.57215	0.000410914	0.0293433	-0.428551	0.668554	1.01519
cg26447747	SHC2	25759	19	440907	-3.57157	0.00041178	0.0293904	0.848998	0.396551	1.00342
cg16586749	NLGN4X	57502	X	5821227	-3.57153	0.000411846	0.0293803	0.50371	0.61483	1.015
cg02295023		0	1	165910942	-3.57123	0.000412305	0.0293984	NA	NA	NA
cg15874258		0	14	99815095	-3.57093	0.000412744	0.0294149	NA	NA	NA
cg10885988		0	9	68454903	-3.5704	0.00041355	0.0294576	NA	NA	NA
cg22517653		0	1	2918612	-3.57006	0.00041407	0.0294799	NA	NA	NA
cg14877589		0	14	60864519	-3.56988	0.000414346	0.0294848	NA	NA	NA
cg14135814	SRRM4	84530	12	119419329	-3.56965	0.000414696	0.029495	4.84205	2.04916e-06	0.000374978
cg05075454	PROKR2	128674	20	5283022	-3.56915	0.000415457	0.0295344	-0.343454	0.731495	1.0092
cg01070209	SRRM4	84530	12	119419331	-3.56769	0.000417685	0.0296631	4.84205	2.04916e-06	0.000374978
cg08633479	USP29	57663	19	57630524	-3.56742	0.000418098	0.0296777	-0.294132	0.768858	1.00346
cg14464057	UNC80	285175	2	210673311	-3.56675	0.000419123	0.0297208	0.632578	0.527485	1.00996
cg24010531		0	19	28400281	-3.56655	0.00041943	0.0297278	NA	NA	NA
cg17624691	LAS1L	81887	X	64754747	-3.56653	0.000419457	0.0297149	0.279882	0.779759	1.00209
cg22504898		0	12	52294622	-3.5663	0.000419806	0.0297248	NA	NA	NA
cg06379368	OPCML	4978	11	133231147	-3.566	0.000420267	0.0297427	0.244579	0.806947	1.00068
cg04210471	CAMTA1	23261	1	7725038	-3.5658	0.000420579	0.02975	-0.748709	0.454611	1.0035
cg05128498	COL6A2	1292	21	47532820	-3.56565	0.000420817	0.029752	-0.0394091	0.96859	0.994884
cg00306003		0	1	171640102	-3.56524	0.000421438	0.0297811	NA	NA	NA
cg15997204	MYT1L	23040	2	2189662	-3.5652	0.0004215	0.0297707	-0.0493466	0.960675	0.993498
cg16400843	C15orf51	196968	15	100339927	-3.56506	0.000421714	0.0297711	0.436958	0.662452	1.01604
cg09677896	MAPK4	5596	18	48256237	-3.56486	0.000422036	0.0297791	-0.148339	0.882174	0.995642
cg19530178	C1QTNF6	114904	22	37578528	-3.56472	0.000422251	0.0297795	-1.10833	0.268596	0.976619
cg13238680		0	10	65733273	-3.56471	0.00042226	0.0297654	NA	NA	NA
cg20698037	CACNA1B	774	9	140815937	-3.56436	0.000422804	0.029789	0.892514	0.372823	0.997815
cg23536473	FERD3L	222894	7	19184555	-3.56334	0.000424378	0.0298851	-0.161784	0.871583	0.996258
cg26983907	FAM20C	56975	7	195987	-3.56202	0.000426443	0.0300156	-1.25178	0.211611	0.955693
cg12074541	SNTG2	54221	2	1286641	-3.56122	0.000427685	0.0300882	-0.177798	0.859	0.997106
cg07072722	NTM	50863	11	131781246	-3.56096	0.0004281	0.0301025	-0.438121	0.66161	1.01676
cg19141556	MYT1L	23040	2	1846907	-3.56094	0.000428132	0.0300899	-0.0493466	0.960675	0.993498
cg23075335	TMEM198	130612	2	220412472	-3.56086	0.000428244	0.0300829	0.0296283	0.976383	0.995624
cg27540865		0	1	243053934	-3.56059	0.000428674	0.0300983	NA	NA	NA
cg04246521	CLDN10	9071	13	96086275	-3.56015	0.000429361	0.0301317	-0.615141	0.538922	1.01024
cg17180705	KCNH1	3756	1	210857111	-3.55973	0.00043003	0.0301637	0.51195	0.609058	1.01496
cg14075645	COL6A2	1292	21	47552343	-3.55951	0.000430373	0.0301729	-0.0394091	0.96859	0.994884
cg14263858	STAP2	55620	19	4328745	-3.55899	0.000431187	0.0302151	-1.69501	0.0910976	0.831989
cg13751257	ABHD8	79575	19	17405237	-3.55894	0.000431271	0.0302062	-0.197171	0.843826	0.998669
cg21708145	LOC154449	154449	6	170565151	-3.55864	0.000431739	0.0302241	-0.314917	0.753041	1.00637
cg01063579		0	16	86715152	-3.55855	0.000431885	0.0302194	NA	NA	NA
cg05398321	GPR68	8111	14	91700968	-3.55786	0.000432972	0.0302806	-1.37604	0.169822	0.926379
cg09164211		0	7	158963946	-3.55683	0.000434611	0.0303654	NA	NA	NA
cg13318368	FAM127B	26071	X	134185920	-3.5568	0.000434649	0.0303532	0.0295202	0.976469	0.995611
cg14239049	SRD5A1P1	6719	X	138529210	-3.55638	0.000435321	0.0303852	NA	NA	NA
cg25121292		0	2	203036093	-3.55627	0.000435501	0.0303829	NA	NA	NA
cg02266732	HTR1A	3350	5	63257710	-3.5558	0.000436241	0.0304196	-0.161399	0.871886	0.996038
cg02821871	SPHK2	56848	19	49133598	-3.55556	0.000436628	0.0304317	2.04186	0.0420288	0.668772
cg14884932		0	19	51774451	-3.55454	0.000438256	0.0305302	NA	NA	NA
cg08583895		0	4	132647023	-3.55437	0.000438527	0.0305341	NA	NA	NA
cg03223558		0	5	130330787	-3.55364	0.000439692	0.0306003	NA	NA	NA
cg04271218	C8orf85	441376	8	117950504	-3.55359	0.000439776	0.0305912	0.0828659	0.934013	0.995855
cg22108469		0	5	174158984	-3.55357	0.000439817	0.0305791	NA	NA	NA
cg24792717	PCDHA6;PCDHA2;PCDHA1;PCDHA7;PCDHA5;PCDHA9;PCDHA3;PCDHA4;PCDHA8	56142	5	140229827	-3.55319	0.000440427	0.0306066	0.115675	0.907986	0.995797
cg21801292		0	4	117626794	-3.55307	0.00044062	0.030605	NA	NA	NA
cg09377572	EHD2	30846	19	48220075	-3.55265	0.000441283	0.0306361	-0.944272	0.34578	0.991907
cg03536885	HOXA3	3200	7	27163820	-3.55113	0.000443738	0.0307916	-1.73081	0.0844998	0.819314
cg16507965	ARX	170302	X	25034151	-3.55053	0.000444713	0.0308442	0.78911	0.430662	1.00426
cg17780447		0	19	22700869	-3.54895	0.000447292	0.031008	NA	NA	NA
cg12388007	ZIC4	84107	3	147110499	-3.54894	0.000447297	0.0309932	-0.60934	0.542754	1.0099
cg11990281		0	6	170778428	-3.54831	0.000448328	0.0310495	NA	NA	NA
cg24730564	LOC100133469	0	14	106938322	-3.54739	0.000449831	0.0311385	NA	NA	NA
cg00040455	NR0B1	190	X	30326676	-3.54728	0.000450013	0.031136	1.53005	0.127045	0.882125
cg06074448		0	4	187884817	-3.54698	0.000450511	0.0311553	NA	NA	NA
cg01603559	SHISA7	729956	19	55945009	-3.54676	0.000450871	0.031165	1.43789	0.151494	0.910276
cg06312477	PRSS38	339501	1	228003900	-3.54627	0.000451674	0.0312054	6.66301	1.25893e-10	4.87325e-08
cg01160125		0	13	64385720	-3.54568	0.000452647	0.0312574	NA	NA	NA
cg21700780	MYOM2	9172	8	2004050	-3.54566	0.000452677	0.0312444	0.454764	0.649603	1.01655
cg27246571	HAL	3034	12	96389588	-3.54556	0.000452844	0.0312408	1.26176	0.208002	0.953297
cg19049724	DLGAP2	9228	8	1639892	-3.54531	0.000453268	0.0312549	-0.286726	0.774518	1.00317
cg02646491	KCNQ1DN	55539	11	2890710	-3.54527	0.00045333	0.031244	0.0985104	0.921592	0.99505
cg10982031		0	12	129330389	-3.54436	0.000454834	0.0313325	NA	NA	NA
cg12169771		0	6	29768248	-3.54385	0.000455682	0.0313757	NA	NA	NA
cg11317473		0	19	55038476	-3.54325	0.000456681	0.0314141	NA	NA	NA
cg13998093	WNT3	7473	17	44896877	-3.54317	0.000456807	0.0314076	-2.94965	0.00342838	0.193305
cg04611159		0	10	134807444	-3.54289	0.000457274	0.0314246	NA	NA	NA
cg01556979	PLXNB2	23654	22	50727524	-3.54261	0.000457734	0.031441	-0.966328	0.334648	0.991775
cg13713830		0	9	79631737	-3.54019	0.000461792	0.0316587	NA	NA	NA
cg16658616		0	16	85196980	-3.53988	0.000462307	0.0316787	NA	NA	NA
cg20756891		0	5	170743951	-3.53906	0.000463696	0.0317586	NA	NA	NA
cg04479219	SLITRK5	26050	13	88326918	-3.539	0.000463791	0.0317498	0.176506	0.860014	0.996903
cg07675031	SPI1	6688	11	47399893	-3.53866	0.000464372	0.0317743	0.582234	0.560841	1.01049
cg04226062		0	6	159736958	-3.53776	0.000465895	0.0318632	NA	NA	NA
cg03345757	SHC2	25759	19	429520	-3.53762	0.000466125	0.0318637	0.848998	0.396551	1.00342
cg19951298	GCM2	9247	6	10883054	-3.53752	0.000466299	0.0318603	1.96726	0.0500618	0.701737
cg11032038	MIR1826	0	16	33965322	-3.5375	0.000466328	0.031847	NA	NA	NA
cg06123187	TRIM11	81559	1	228582696	-3.53737	0.000466546	0.0318466	2.04536	0.0416804	0.668513
cg24126888		0	8	86556176	-3.53727	0.000466724	0.0318435	NA	NA	NA
cg23732962	CROCC	9696	1	17293114	-3.53722	0.000466804	0.0318337	-0.477245	0.633531	1.01523
cg10566622	INTS1	26173	7	1519184	-3.53721	0.000466823	0.0318197	1.05609	0.291765	0.983083
cg24524057		0	10	125732842	-3.53672	0.000467657	0.0318613	NA	NA	NA
cg06167730		0	8	991533	-3.53639	0.000468221	0.0318845	NA	NA	NA
cg26149244		0	17	80329964	-3.53632	0.000468333	0.0318769	NA	NA	NA
cg03667228		0	12	128245593	-3.53454	0.000471381	0.032069	NA	NA	NA
cg23473396		0	X	25041134	-3.53434	0.000471724	0.032077	NA	NA	NA
cg26556078	CACNA1B	774	9	140816336	-3.53411	0.000472119	0.0320885	0.892514	0.372823	0.997815
cg18448695		0	20	56781117	-3.53408	0.000472172	0.0320768	NA	NA	NA
cg13902069	COL6A2	1292	21	47551987	-3.53387	0.000472526	0.0320856	-0.0394091	0.96859	0.994884
cg26975812	POLE	5426	12	133250047	-3.53375	0.000472732	0.0320843	1.46714	0.143372	0.90129
cg01413848	PRDM16	63976	1	3081226	-3.53371	0.000472807	0.0320741	-0.246276	0.805635	1.00096
cg02635236		0	17	54588272	-3.5335	0.000473159	0.0320827	NA	NA	NA
cg22335876		0	7	121940581	-3.53328	0.000473545	0.0320935	NA	NA	NA
cg19821713		0	15	96909816	-3.53327	0.000473559	0.0320792	NA	NA	NA
cg03868332	GLI3	2737	7	42006120	-3.53303	0.000473979	0.0320924	-1.13387	0.257741	0.974102
cg08164006		0	9	139086145	-3.53302	0.000473999	0.0320785	NA	NA	NA
cg06070263	ZIC4	84107	3	147115930	-3.53231	0.000475219	0.0321458	-0.60934	0.542754	1.0099
cg01405404		0	19	37282556	-3.53215	0.000475484	0.0321485	NA	NA	NA
cg24134219	SV2C	22987	5	75378176	-3.53202	0.000475715	0.0321488	0.201721	0.84027	0.999456
cg25516803	CCK	885	3	42307519	-3.53115	0.000477218	0.0322351	-1.04386	0.297382	0.985511
cg21858485		0	3	130236027	-3.53092	0.00047762	0.0322469	NA	NA	NA
cg01035789		0	16	88237772	-3.53072	0.000477971	0.0322553	NA	NA	NA
cg10023530	FAM38B	63895	18	11148783	-3.53055	0.00047826	0.0322596	1.90848	0.0572706	0.731937
cg17508300	HPSE2	60495	10	100992656	-3.52773	0.000483183	0.0325608	-0.994604	0.32072	0.990453
cg23300509		0	18	77608384	-3.52752	0.000483549	0.03257	NA	NA	NA
cg21784383	ESRRG	2104	1	217311172	-3.52593	0.000486343	0.0327427	1.37772	0.169303	0.926564
cg26660002	GALNT13	114805	2	154729763	-3.5257	0.000486749	0.0327546	0.393189	0.694456	1.01126
cg27629948		0	15	89285170	-3.52561	0.000486909	0.0327499	NA	NA	NA
cg21711132	GABRG3	2567	15	27215952	-3.52539	0.000487307	0.0327612	-0.170717	0.86456	0.996206
cg01433913	RUNDC2A	92017	16	12136773	-3.52518	0.00048768	0.0327708	0.26062	0.794562	1.00167
cg13069918	HTR6	3362	1	20005744	-3.52516	0.000487717	0.0327578	-1.22809	0.220362	0.964065
cg15913846		0	3	155027522	-3.52502	0.000487964	0.0327589	NA	NA	NA
cg04428163	SDCBP2	27111	20	1294021	-3.52482	0.000488308	0.0327666	-0.642029	0.521338	1.00982
cg15393297	GABRB1	2560	4	47427774	-3.52473	0.000488466	0.0327617	0.495351	0.62071	1.01505
cg01487661		0	7	63643277	-3.52458	0.000488739	0.0327646	NA	NA	NA
cg20337445	RASD2	23551	22	35947818	-3.52457	0.000488757	0.0327504	-1.13282	0.258181	0.973753
cg21660452	NRXN2	9379	11	64397807	-3.52448	0.000488915	0.0327456	0.915307	0.360756	0.995838
cg26115216	PRR23B	389151	3	138739916	-3.52426	0.000489312	0.0327568	-0.264809	0.791336	1.00137
cg24496841		0	7	19152017	-3.5229	0.000491725	0.0329028	NA	NA	NA
cg03306967		0	15	95398978	-3.52254	0.000492373	0.0329307	NA	NA	NA
cg20185461	COMP	1311	19	18899082	-3.52148	0.000494261	0.0330415	-0.539409	0.59	1.01246
cg03243835	PCDHA2;PCDHA1;PCDHA3	56146	5	140182818	-3.52147	0.000494273	0.0330268	1.60894	0.108667	0.860146
cg04918541	GLI2	2736	2	121742289	-3.52041	0.000496185	0.033139	0.271295	0.786348	1.00224
cg03300898		0	17	18538782	-3.51922	0.000498332	0.0332668	NA	NA	NA
cg09759523	ITIH5	80760	10	7621857	-3.51914	0.000498469	0.0332603	-0.680265	0.496854	1.00818
cg08269742	PIK3R5	23533	17	8868541	-3.51907	0.000498597	0.0332533	0.497317	0.619325	1.01493
cg11594420	TEX101	83639	19	43919028	-3.51886	0.000498976	0.033263	-1.18954	0.235154	0.969964
cg25691239	TPTE	7179	21	10991412	-3.51698	0.000502387	0.0334747	0.979111	0.328304	0.990917
cg06672560	CBLN4	140689	20	54580175	-3.51675	0.000502808	0.0334871	0.852223	0.394761	1.00267
cg08152819	PTP4A3	11156	8	142440406	-3.5154	0.000505265	0.0336192	-2.06337	0.0399259	0.657129
cg24604013	SOX1	6656	13	112721325	-3.51501	0.000505986	0.0336515	-0.413624	0.679441	1.01375
cg08079763	DIP2C	22982	10	679171	-3.51481	0.000506347	0.0336598	-3.06797	0.00234923	0.151563
cg15433798	NUDT9P1	119369	10	92913556	-3.51451	0.000506895	0.0336805	-0.482578	0.629743	1.0162
cg24803719		0	17	45855879	-3.51439	0.000507121	0.0336798	NA	NA	NA
cg18269894	MIR410;MIR656	574434	14	101532106	-3.51402	0.000507797	0.033709	NA	NA	NA
cg09788161	FAM47A	158724	X	34148765	-3.5138	0.000508202	0.0337201	-0.245514	0.806224	1.00077
cg12250896	DPYSL4	10570	10	134001112	-3.51379	0.000508214	0.0337052	1.87253	0.0620932	0.757499
cg02812399	KLHL34	257240	X	21676081	-3.51372	0.000508341	0.0336979	-0.901112	0.368242	0.995881
cg11072794		0	19	388349	-3.51334	0.000509046	0.033729	NA	NA	NA
cg09669104	PCDHGA2;PCDHGA1	56113	5	140720212	-3.51304	0.00050959	0.0337336	0.242406	0.808629	1.00085
cg24596788		0	1	163392923	-3.51292	0.000509822	0.0337333	NA	NA	NA
cg06329547	MAD1L1	8379	7	1937739	-3.51265	0.000510321	0.0337506	-0.0907625	0.927741	0.995495
cg04747678	MARK4	57787	19	45805662	-3.51221	0.000511128	0.0337883	-1.06707	0.286785	0.980251
cg09671258	LHX4	89884	1	180202530	-3.51198	0.000511547	0.0338003	2.39776	0.0170986	0.474727
cg23668184	SOX11	6664	2	5836713	-3.51198	0.00051155	0.0337848	-0.488937	0.625239	1.01643
cg00145253	LHX8	431707	1	75602857	-3.5118	0.000511896	0.033792	-0.279529	0.780029	1.00199
cg19091036		0	12	114878144	-3.5108	0.000513751	0.0338831	NA	NA	NA
cg20569855	PSRC1	84722	1	109824440	-3.50971	0.000515774	0.0340007	1.77571	0.0767809	0.799546
cg04461228	FLJ42709	0	5	92906678	-3.50939	0.000516361	0.0340237	NA	NA	NA
cg05988356		0	16	34295916	-3.50898	0.000517139	0.0340592	NA	NA	NA
cg11840984	PRR23C	389152	3	138762690	-3.50893	0.000517222	0.0340489	-0.224231	0.822728	1.00095
cg13319711		0	7	39015544	-3.50832	0.000518359	0.034108	NA	NA	NA
cg09796800	SLC25A31	83447	4	128651518	-3.50816	0.000518665	0.0341123	-0.792292	0.428808	1.00647
cg00517796	F7	2155	13	113772778	-3.5081	0.000518787	0.0341046	-0.68187	0.495841	1.00826
cg15991553		0	14	101290867	-3.50769	0.00051954	0.0341384	NA	NA	NA
cg11930477		0	11	31841980	-3.50737	0.000520147	0.0341625	NA	NA	NA
cg09748946		0	7	57484821	-3.50655	0.000521699	0.0342328	NA	NA	NA
cg05093561		0	18	76189844	-3.50652	0.000521757	0.0342209	NA	NA	NA
cg18396459	TGM6	343641	20	2384367	-3.50637	0.000522032	0.0342231	-0.537906	0.591036	1.01242
cg19331677	C15orf60	283677	15	73735333	-3.50622	0.000522307	0.0342254	-0.434574	0.66418	1.01559
cg02449694	MGAT5B	146664	17	74878309	-3.50525	0.000524152	0.0343147	-1.04147	0.298485	0.986085
cg17556421	RIMBP2	23504	12	130908778	-3.50464	0.000525306	0.0343587	-0.787561	0.431567	1.00498
cg19806642	GRM6	2916	5	178422140	-3.50425	0.000526049	0.0343757	1.13655	0.256623	0.973715
cg13981425		0	20	25064268	-3.50377	0.000526955	0.0344033	NA	NA	NA
cg25007487	OOEP	441161	6	74079672	-3.50375	0.000526986	0.0343896	-0.0365362	0.970879	0.9949
cg08456859		0	1	48450143	-3.50299	0.000528444	0.0344689	NA	NA	NA
cg08589214	CAPN10	11132	2	241535685	-3.50285	0.000528714	0.0344707	0.587368	0.557392	1.01042
cg13053372		0	7	63032888	-3.50211	0.000530127	0.0345471	NA	NA	NA
cg24680320		0	19	37803573	-3.5021	0.000530145	0.0345324	NA	NA	NA
cg11036833	CDO1	1036	5	115152494	-3.50204	0.000530261	0.0345242	2.47709	0.0137894	0.437114
cg23655615	WNT7A	7476	3	13896124	-3.50187	0.000530587	0.0345296	-1.75059	0.0810256	0.809813
cg01138921	SPSB4	92369	3	140785473	-3.50162	0.000531068	0.0345451	-0.478689	0.632504	1.01553
cg26017136		0	8	1138280	-3.50099	0.000532267	0.0346073	NA	NA	NA
cg10317283		0	8	1105655	-3.50086	0.000532527	0.0346084	NA	NA	NA
cg19254793		0	6	44695348	-3.5005	0.000533214	0.0346373	NA	NA	NA
cg10978884	AMMECR1	9949	X	109561384	-3.50014	0.000533904	0.0346347	0.33874	0.73504	1.00843
cg23302682	T	6862	6	166580952	-3.50008	0.000534018	0.0346263	-0.787422	0.431649	1.00493
cg19908485		0	1	149156294	-3.49988	0.000534402	0.0346354	NA	NA	NA
cg00772850	LOC642006	0	7	57247891	-3.49882	0.000536452	0.0347525	NA	NA	NA
cg02361878	LMX1A	4009	1	165326327	-3.49872	0.000536638	0.0347487	0.949646	0.343047	0.993266
cg26090619		0	17	80330167	-3.49787	0.000538296	0.0348402	NA	NA	NA
cg02885007	HOXD9	3235	2	176987605	-3.49781	0.000538401	0.0348312	-1.31681	0.188895	0.937212
cg18451814	OTX2	5015	14	57278188	-3.49755	0.000538913	0.0348485	-0.140751	0.88816	0.996642
cg07665134	DIP2C	22982	10	669071	-3.49702	0.00053994	0.034899	-3.06797	0.00234923	0.151563
cg13317079	CCDC150	284992	2	197504192	-3.49689	0.000540191	0.0348994	0.581351	0.561435	1.01056
cg00729627		0	19	54271827	-3.4968	0.000540378	0.0348957	NA	NA	NA
cg04080041	PCDHGA4;PCDHGA11;PCDHGA9;PCDHGA1;PCDHGB1;PCDHGB6;PCDHGA12;PCDHGB3;PCDHGB7;PCDHGA6;PCDHGA8;PCDHGA10;PCDHGA5;PCDHGB4;PCDHGA3;PCDHGA2;PCDHGA7;PCDHGB2;PCDHGB5	56111	5	140811253	-3.49661	0.000540749	0.0349038	-0.378441	0.705367	1.01171
cg03816687		0	20	21683745	-3.49645	0.000541049	0.0349073	NA	NA	NA
cg26277102	ZNF717	100131827	3	75834282	-3.49526	0.00054338	0.0350419	1.19749	0.23205	0.970081
cg26998717	MYF5	4617	12	81110893	-3.49504	0.000543806	0.0350535	2.09179	0.0372869	0.638764
cg27057652	PXDNL	137902	8	52322137	-3.49486	0.000544164	0.0350607	0.121162	0.903643	0.994392
cg15794859	TCF21	6943	6	134214134	-3.49461	0.000544651	0.0350762	1.93889	0.0534396	0.719523
cg13371456	C4orf22	255119	4	81307951	-3.49445	0.000544961	0.0350803	0.317273	0.751254	1.00659
cg19028079	FAM20C	56975	7	207774	-3.49343	0.000546963	0.0351932	-1.25178	0.211611	0.955693
cg01779765	FLJ43390	0	14	62583795	-3.49129	0.000551192	0.0354493	NA	NA	NA
cg10323921		0	12	127940906	-3.49048	0.000552802	0.0355368	NA	NA	NA
cg04105230	PCSK6	5046	15	101938681	-3.49031	0.000553155	0.0355435	-0.0684564	0.945467	0.992765
cg22926923		0	14	102054053	-3.49021	0.000553336	0.035539	NA	NA	NA
cg14521777	VAV2	7410	9	136758765	-3.48983	0.000554104	0.0355723	-1.52013	0.129518	0.885254
cg23210938	TKTL2	84076	4	164395039	-3.48885	0.000556062	0.0356819	-0.176477	0.860037	0.996872
cg25501902	EMILIN2	84034	18	2913220	-3.48823	0.000557309	0.0357458	0.571095	0.568357	1.01189
cg14884793		0	13	109148553	-3.48757	0.000558635	0.0358148	NA	NA	NA
cg18720642	DACH2	117154	X	85403636	-3.48724	0.000559297	0.0358411	-0.0107188	0.991455	0.998649
cg27254482	OLIG2	10215	21	34398085	-3.48586	0.000562071	0.0360026	1.91479	0.0564577	0.727087
cg12888005	PIM2	11040	X	48776567	-3.48545	0.000562903	0.0360397	-0.297627	0.766191	1.00408
cg10831196	DLGAP2	9228	8	1579039	-3.48517	0.000563466	0.0360595	-0.286726	0.774518	1.00317
cg19461949		0	9	68298597	-3.48444	0.000564946	0.036138	NA	NA	NA
cg21591624	SLC6A5	9152	11	20623199	-3.4844	0.000565034	0.0361274	-0.230144	0.818135	1.00135
cg06653203	WNT7A	7476	3	13860477	-3.48416	0.000565523	0.0361425	-1.75059	0.0810256	0.809813
cg06909921		0	13	19964838	-3.48356	0.000566738	0.0361876	NA	NA	NA
cg16666329	OTP	23440	5	76932526	-3.48318	0.0005675	0.03622	0.969481	0.333076	0.992081
cg12193249	SHC2	25759	19	440701	-3.48299	0.000567906	0.0362297	0.848998	0.396551	1.00342
cg08060890	RHOXF1	158800	X	119249745	-3.4823	0.000569311	0.0363031	1.26815	0.205714	0.952351
cg04094791	HSPA7	3311	1	161576629	-3.4821	0.000569721	0.0362967	1.57029	0.117387	0.877092
cg17481476	ANKRD30A	91074	10	37414736	-3.48194	0.000570033	0.0362841	-0.22939	0.81872	1.00122
cg26950400	PRICKLE3	4007	X	49043021	-3.48075	0.000572493	0.0364082	1.05462	0.292439	0.982885
cg23320334	CXADRP3	440224	18	14487209	-3.47999	0.000574045	0.0364743	-0.322397	0.747373	1.00655
cg09049334	FAM48B1	170067	X	24380401	-3.47878	0.000576542	0.0366166	2.26162	0.0244273	0.551849
cg05501509		0	17	75789529	-3.47785	0.000578474	0.0367229	NA	NA	NA
cg24035953	IRS4	8471	X	107976034	-3.47782	0.000578528	0.03671	-0.289409	0.772466	1.00329
cg08997253	GRIN3A	116443	9	104500729	-3.47778	0.000578612	0.0366989	1.10935	0.268154	0.976602
cg12833465	SFTA3	253970	14	36977887	-3.47655	0.000581175	0.0368451	-0.324769	0.745579	1.00689
cg14495054		0	X	139590253	-3.47613	0.000582058	0.0368847	NA	NA	NA
cg00258480	PIM2	11040	X	48776587	-3.47607	0.000582176	0.0368757	-0.297627	0.766191	1.00408
cg14875394		0	3	191581259	-3.47548	0.00058341	0.0369375	NA	NA	NA
cg02931432		0	11	59665786	-3.47359	0.000587377	0.0371721	NA	NA	NA
cg00447018	LOC100133469	0	14	106938320	-3.47357	0.000587423	0.0371585	NA	NA	NA
cg13598193	THOP1	7064	19	2799757	-3.47328	0.000588039	0.0371809	0.653526	0.513911	1.01001
cg01337197	A4GALT	53947	22	43089547	-3.47303	0.000588551	0.0371968	-2.59008	0.0100576	0.379121
cg17257265	ATPGD1	57571	11	67191526	-3.47255	0.000589571	0.0372447	-0.359425	0.719527	1.01112
cg06822360		0	8	2242304	-3.47216	0.00059039	0.0372799	NA	NA	NA
cg10981651		0	5	153853545	-3.47199	0.00059075	0.0372861	NA	NA	NA
cg22830844	C3orf77	375337	3	44283343	-3.47189	0.000590977	0.0372839	-0.207023	0.836131	0.999019
cg02679291	GLTSCR2	29997	19	48248902	-3.47169	0.000591392	0.0372936	0.96998	0.332827	0.991781
cg27119212	MAD1L1	8379	7	2044678	-3.47167	0.000591432	0.0372796	-0.0907625	0.927741	0.995495
cg08346159	NPY5R	4889	4	164265012	-3.47152	0.000591755	0.0372834	1.56035	0.119717	0.877878
cg08307753	UBE2MP1	606551	16	34404673	-3.47106	0.000592729	0.0373283	0.618302	0.536839	1.01057
cg09996789		0	16	1310584	-3.47036	0.000594206	0.0374048	NA	NA	NA
cg07433773		0	22	17898286	-3.47021	0.000594544	0.0374095	NA	NA	NA
cg23154024	SPIN3	169981	X	57021680	-3.4702	0.000594566	0.0373944	0.65594	0.512359	1.00942
cg26994225		0	2	119616769	-3.47008	0.000594816	0.0373936	NA	NA	NA
cg21479762		0	8	255192	-3.47005	0.000594872	0.0373806	NA	NA	NA
cg15222651	ZNF560	147741	19	9609152	-3.46992	0.000595145	0.0373812	1.36243	0.17407	0.928664
cg03854077		0	4	189580596	-3.46886	0.000597422	0.0375077	NA	NA	NA
cg25528916	STAP2	55620	19	4328818	-3.46876	0.00059763	0.0375042	-1.69501	0.0910976	0.831989
cg19402939	CHRD	8646	3	184104481	-3.46839	0.000598428	0.0375378	-0.845672	0.398401	1.0033
cg05390473		0	16	34741251	-3.46829	0.000598642	0.0375347	NA	NA	NA
[truncated: 2,266 more rows]

## Sheet: CRC
								expr	expr	expr
								CRC	CRC	CRC
Composite Element REF	Gene_Symbol	Entrez ID	Chromosome	Genomic_Coordinate	t	p	fdr	t (pos=higher met)	p	FDR
cg24136205	ZIC5	85416	13	100624293	-9.61344	8.73e-20	1.55331e-15	-0.72808	0.467013	0.965064
cg24419436	UBXN6	80700	19	4446031	-8.89067	2.25e-17	2.90571e-13	-0.630486	0.528755	0.971069
cg00162231	SLC6A1	6529	3	11035357	-8.80935	4.12e-17	4.88857e-13	-0.798092	0.425316	0.952491
cg05773599	WDR90	197335	16	712872	-8.30776	1.61e-15	1.4313e-11	1.79308	0.0737556	0.67523
cg00262344	PSMA8	143471	18	23713741	-8.13495	5.5e-15	4.34885e-11	6.61123	1.29356e-10	1.23726e-07
cg00173659		0	7	156871088	-7.99887	1.43e-14	1.01757e-10	NA	NA	NA
cg16419354	FAM163A	148753	1	179713349	-7.9289	2.33e-14	1.57707e-10	-1.23676	0.21694	0.862351
cg18533201	GDF6	392255	8	97157453	-7.85178	3.97e-14	2.56586e-10	-1.08595	0.278189	0.904014
cg19628148	CCDC37	348807	3	126113918	-7.83217	4.54e-14	2.80907e-10	1.55534	0.120699	0.774058
cg16426293		0	17	40192112	-7.59964	2.21e-13	1.31067e-09	NA	NA	NA
cg24127719		0	21	38068660	-7.59842	2.23e-13	1.26859e-09	NA	NA	NA
cg17876831	SLC5A10	125206	17	18918410	-7.46296	5.52e-13	2.9074e-09	0.312514	0.754822	1.00499
cg25724283	DCLK1	9201	13	36705475	-7.41238	7.71e-13	3.92071e-09	-0.657794	0.511069	0.970901
cg04735481		0	16	90172816	-7.38565	9.2e-13	4.51673e-09	NA	NA	NA
cg00529958	ZIC5	85416	13	100624288	-7.28225	1.81e-12	8.60762e-09	-0.72808	0.467013	0.965064
cg21414902	AP3D1	8943	19	2131880	-7.20041	3.09e-12	1.41846e-08	0.359818	0.719183	1.00267
cg05979020	HOXD10	3236	2	176981336	-7.15035	4.27e-12	1.89874e-08	-1.54865	0.122297	0.775398
cg15916399	DOK6	220164	18	67068457	-7.11135	5.49e-12	2.36609e-08	-1.19865	0.23141	0.873048
cg20156659	LHCGR	3973	2	48982832	-7.08573	6.47e-12	2.70648e-08	6.4716	2.99393e-10	2.73346e-07
cg03162994	PSMA8	143471	18	23713729	-7.06431	7.41e-12	3.01506e-08	6.61123	1.29356e-10	1.23726e-07
cg22731204	NFIC	4782	19	3382127	-6.94356	1.6e-11	6.1372e-08	-3.43585	0.000655936	0.0818331
cg13598010		0	7	72838776	-6.91441	1.92e-11	7.1796e-08	NA	NA	NA
cg03301075	MRGPRE	116534	11	3254240	-6.89605	2.15e-11	7.85027e-08	-0.636617	0.524758	0.971455
cg15865827	PSMA8	143471	18	23713838	-6.73333	5.92e-11	2.10541e-07	6.61123	1.29356e-10	1.23726e-07
cg21304453	SLC4A11	83959	20	3218794	-6.69996	7.26e-11	2.52197e-07	-1.57966	0.115016	0.765477
cg17227967	C20orf103	24141	20	9496556	-6.58771	1.44e-10	4.88283e-07	1.05056	0.29413	0.911712
cg02774542	RGL3	57139	19	11517152	-6.58608	1.46e-10	4.81688e-07	-1.06284	0.288531	0.910802
cg12210255		0	7	72838671	-6.57543	1.55e-10	5.02099e-07	NA	NA	NA
cg26784527	HIST3H3	8290	1	228613102	-6.54434	1.87e-10	5.92376e-07	0.85321	0.39408	0.945359
cg00099383		0	6	168633917	-6.52145	2.15e-10	6.65161e-07	NA	NA	NA
cg05521717	RPS6KA2	6196	6	166826097	-6.4818	2.73e-10	8.08719e-07	-2.59894	0.00971531	0.344165
cg27095847	PNLDC1	154197	6	160221218	-6.46199	3.07e-10	8.73967e-07	3.565	0.000410246	0.0601475
cg13794529	CD46	4179	1	207925653	-6.45886	3.13e-10	8.73048e-07	-0.2377	0.812242	1.00708
cg15027907		0	19	48076699	-6.30942	7.57e-10	1.99648e-06	NA	NA	NA
cg00619126		0	2	105459775	-6.3081	7.63e-10	1.97549e-06	NA	NA	NA
cg20272155	HCCA2;LOC402778	81532	11	1769462	-6.28138	8.93e-10	2.26873e-06	-1.00905	0.313592	0.921823
cg08113595	USF2	7392	19	35770164	-6.27896	9.05e-10	2.26066e-06	-0.784351	0.433323	0.958137
cg24112562		0	21	38070041	-6.27841	9.08e-10	2.22877e-06	NA	NA	NA
cg10265740	ZNF167	55888	3	44622865	-6.23989	1.14e-09	2.74254e-06	-1.45242	0.147209	0.800446
cg12152420		0	12	133019135	-6.22788	1.22e-09	2.89171e-06	NA	NA	NA
cg06873106	ARSI	340075	5	149677362	-6.21887	1.28e-09	2.99702e-06	-1.79295	0.0737759	0.675109
cg26330987	TBC1D14	57533	4	7027124	-6.21414	1.32e-09	3.03066e-06	-0.146478	0.883622	1.00518
cg07462756	MSX1	4487	4	4859985	-6.20001	1.43e-09	3.23692e-06	-1.92964	0.0543957	0.635228
cg16190575		0	11	129910653	-6.17205	1.68e-09	3.74473e-06	NA	NA	NA
cg02720091	CASZ1	54897	1	10699958	-6.14148	2.01e-09	4.39615e-06	1.19885	0.231334	0.873253
cg25668320		0	4	144833231	-6.1402	2.02e-09	4.36151e-06	NA	NA	NA
cg11229862	CCDC37	348807	3	126113682	-6.09046	2.69e-09	5.71168e-06	1.55534	0.120699	0.774058
cg23226397	SERPINF2	5345	17	1657480	-6.09004	2.7e-09	5.64122e-06	-2.16899	0.0307031	0.541443
cg00209038	LHCGR	3973	2	48982683	-6.06633	3.08e-09	6.27269e-06	6.4716	2.99393e-10	2.73346e-07
cg19338222	RYR1	6261	19	39052032	-5.96939	5.34e-09	1.05486e-05	-0.539711	0.589712	0.984046
cg15480367	CHGA	1113	14	93389485	-5.96278	5.54e-09	1.07976e-05	2.71395	0.00695151	0.30823
cg20406730		0	2	620840	-5.95182	5.89e-09	1.13268e-05	NA	NA	NA
cg03340466	FAM163A	148753	1	179712740	-5.94544	6.1e-09	1.1583e-05	-1.23676	0.21694	0.862351
cg20697926		0	18	77377589	-5.93424	6.5e-09	1.20114e-05	NA	NA	NA
cg25372165		0	18	76463364	-5.92048	7.02e-09	1.28047e-05	NA	NA	NA
cg18274480		0	5	145713863	-5.89295	8.18e-09	1.47387e-05	NA	NA	NA
cg10137837	BCL6B	255877	17	6926742	-5.84035	1.09e-08	1.94796e-05	-0.757187	0.449407	0.962447
cg24634568		0	1	43250769	-5.81004	1.29e-08	2.27355e-05	NA	NA	NA
cg26983710	GALNT13	114805	2	154728202	-5.80378	1.34e-08	2.32442e-05	1.37224	0.170799	0.822111
cg18115040	HOXD10	3236	2	176981328	-5.79167	1.43e-08	2.45437e-05	-1.54865	0.122297	0.775398
cg16053281	LRRC33	375387	3	196387058	-5.77402	1.58e-08	2.67125e-05	-1.41347	0.158335	0.810891
cg07377891	DHX33	56919	17	5347650	-5.75067	1.79e-08	2.96423e-05	-0.201734	0.840233	1.00476
cg00091794	GABBR2	9568	9	101472149	-5.75054	1.79e-08	2.93215e-05	0.40328	0.686969	0.999816
cg13599131	BNIP3	664	10	133796523	-5.71193	2.21e-08	3.57633e-05	0.721144	0.471264	0.96462
cg17705066	GIPC3	126326	19	3587038	-5.70695	2.27e-08	3.63295e-05	-1.06211	0.288858	0.910119
cg24100167	PNLDC1	154197	6	160221433	-5.68696	2.53e-08	4.00339e-05	3.565	0.000410246	0.0601475
cg11697427		0	10	102590168	-5.6867	2.53e-08	3.96488e-05	NA	NA	NA
cg25953239	HOXD10	3236	2	176982342	-5.67936	2.64e-08	4.08052e-05	-1.54865	0.122297	0.775398
cg09686443	CCDC37	348807	3	126113658	-5.66941	2.78e-08	4.2592e-05	1.55534	0.120699	0.774058
cg09458820	ESRRA	2101	11	64073710	-5.66065	2.92e-08	4.37118e-05	1.01666	0.309961	0.919219
cg00548268	NPTX2	4885	7	98245830	-5.62031	3.62e-08	5.37217e-05	1.27382	0.203506	0.851231
cg13709982	SARDH	1757	9	136567739	-5.61153	3.8e-08	5.57265e-05	-1.33665	0.182137	0.83089
cg24646414	GATA4	2626	8	11565725	-5.60333	3.97e-08	5.76315e-05	1.24894	0.212457	0.858117
cg22871144		0	19	835345	-5.59891	4.06e-08	5.84106e-05	NA	NA	NA
cg18297437	ZIC1	7545	3	147131332	-5.56606	4.84e-08	6.88877e-05	-0.369959	0.711619	1.00144
cg18995143	HRNBP3	146713	17	77134159	-5.55402	5.16e-08	7.27059e-05	0.885313	0.376548	0.938146
cg05962092	KCNA7	3743	19	49575664	-5.54934	5.29e-08	7.38056e-05	-0.470827	0.638034	0.990077
cg15578601		0	7	1659211	-5.53764	5.63e-08	7.77627e-05	NA	NA	NA
cg23598462	HDAC4	9759	2	240101504	-5.53387	5.74e-08	7.85655e-05	0.697221	0.486091	0.966312
cg02508651		0	17	46604554	-5.52615	5.98e-08	8.10571e-05	NA	NA	NA
cg25590335	PKN1	5585	19	14552072	-5.51703	6.27e-08	8.42565e-05	-1.31304	0.189961	0.839137
cg21109744	CCDC37	348807	3	126113743	-5.51258	6.42e-08	8.5452e-05	1.55534	0.120699	0.774058
cg06636427	UNCX	340260	7	1273200	-5.48678	7.36e-08	9.52138e-05	-0.0874019	0.930398	0.99941
cg17467925	PPP2R2C	5522	4	6380489	-5.47214	7.95e-08	0.000101893	-1.36422	0.173305	0.825076
cg12530503	MIR9-3	407051	15	89911148	-5.47092	8e-08	0.000101627	NA	NA	NA
cg10533746	C2orf81	388963	2	74645626	-5.46808	8.12e-08	0.000102243	-0.770924	0.441231	0.959256
cg00063006	PPP1R2P1	100507444	6	32847530	-5.46552	8.23e-08	0.000102709	NA	NA	NA
cg24377495		0	19	6660075	-5.45105	8.87e-08	0.000109826	NA	NA	NA
cg20685897	CR1L	1379	1	207818696	-5.44922	8.96e-08	0.000109928	-0.835836	0.403772	0.950225
cg06962177		0	1	63785946	-5.44602	9.11e-08	0.000110825	NA	NA	NA
cg11545720	SEMA6B	10501	19	4558377	-5.43092	9.86e-08	0.00011889	-1.43868	0.151063	0.802076
cg14015441	DPYS	1807	8	105479318	-5.41742	1.06e-07	0.000126473	-0.590403	0.555271	0.976208
cg18725867	GDNF	2668	5	37834958	-5.41742	1.06e-07	0.000125423	-1.36016	0.174587	0.82473
cg06622999	LOC283392;TRHDE	0	12	72666281	-5.4158	1.07e-07	0.000125438	NA	NA	NA
cg15385479	MRGPRE	116534	11	3254475	-5.38777	1.23e-07	0.000143884	-0.636617	0.524758	0.971455
cg14439622	GATA6	2627	18	19752292	-5.35915	1.43e-07	0.000162816	1.14535	0.252786	0.886739
cg20634266		0	1	91190493	-5.35746	1.44e-07	0.000162936	NA	NA	NA
cg23217126	DOK6	220164	18	67068268	-5.35726	1.44e-07	0.000161825	-1.19865	0.23141	0.873048
cg22519265	ATP2A3	489	17	3828052	-5.34614	1.53e-07	0.000168702	-2.0721	0.0389301	0.585731
cg21214293		0	5	145713882	-5.32264	1.73e-07	0.00018888	NA	NA	NA
cg17310258		0	11	31847173	-5.31246	1.82e-07	0.000195981	NA	NA	NA
cg23457622	CELSR1	9620	22	46860228	-5.30998	1.84e-07	0.000196997	-2.49172	0.0131383	0.386378
cg17613596	CUL4A	8451	13	113870048	-5.29279	2.01e-07	0.000213475	1.11414	0.265923	0.896948
cg02456451		0	7	156871073	-5.27759	2.17e-07	0.000228972	NA	NA	NA
cg20311631	RGL3	57139	19	11517268	-5.26509	2.31e-07	0.000242221	-1.06284	0.288531	0.910802
cg09656389	PAX6	5080	11	31839790	-5.25663	2.42e-07	0.000251002	-0.824023	0.410444	0.950775
cg14354327		0	10	131763676	-5.25503	2.44e-07	0.000251217	NA	NA	NA
cg03300078	HCCA2;LOC402778	81532	11	1769522	-5.24892	2.51e-07	0.000257264	-1.00905	0.313592	0.921823
cg07189222	PPP1R2P1	100507444	6	32847527	-5.24876	2.51e-07	0.000255637	NA	NA	NA
cg09946603		0	6	56297393	-5.23855	2.65e-07	0.000267296	NA	NA	NA
cg00741731	LYPD4;DMRTC2	147719	19	42348676	-5.23625	2.68e-07	0.000268519	-0.186797	0.851919	1.00509
cg19327414	PNLDC1	154197	6	160221247	-5.23323	2.72e-07	0.000270743	3.565	0.000410246	0.0601475
cg04428799	ZFYVE20	64145	3	15116218	-5.22976	2.77e-07	0.000273633	-1.3384	0.181567	0.830553
cg18849102	MSX1	4487	4	4859935	-5.22798	2.79e-07	0.000274194	-1.92964	0.0543957	0.635228
cg04726439	COMP	1311	19	18898394	-5.2244	2.84e-07	0.000275399	-1.63671	0.102519	0.741789
cg09937849	RGS11	8786	16	318717	-5.22198	2.88e-07	0.000276908	2.162	0.0312415	0.542834
cg09614300	HMX3	340784	10	124894076	-5.22192	2.88e-07	0.000275136	0.699432	0.48471	0.966054
cg06836740	AGBL4	84871	1	49364558	-5.21896	2.92e-07	0.000277416	0.157545	0.874899	1.00568
cg07134627		0	21	45883729	-5.21895	2.92e-07	0.000275583	NA	NA	NA
cg10266211	MSX1	4487	4	4860082	-5.20821	3.09e-07	0.000287124	-1.92964	0.0543957	0.635228
cg08231577	CD58	965	1	117077088	-5.20209	3.18e-07	0.000294192	0.0776984	0.938109	0.998985
cg08864344		0	1	33772997	-5.19657	3.27e-07	0.00030052	NA	NA	NA
cg21998983	GALNT13	114805	2	154727925	-5.17419	3.66e-07	0.000334099	1.37224	0.170799	0.822111
cg02096887	CASZ1	54897	1	10699831	-5.17079	3.72e-07	0.000337683	1.19885	0.231334	0.873253
cg00148892	GATA6	2627	18	19780878	-5.16546	3.83e-07	0.000344616	1.14535	0.252786	0.886739
cg16269431	GLRB	2743	4	157997367	-5.16042	3.92e-07	0.000351204	-1.18324	0.237452	0.876256
cg17667595		0	13	112848772	-5.15607	4.01e-07	0.000356673	NA	NA	NA
cg10514093	PPP1R2P3	153743	5	156277587	-5.15559	4.02e-07	0.00035532	0.620819	0.535091	0.973007
cg26738106	MXRA5	25878	X	3265038	-5.15521	4.03e-07	0.000353786	-2.88902	0.00408583	0.235152
cg27330553	STEAP1	26872	7	89783976	-5.14237	4.29e-07	0.000374888	-1.00629	0.314917	0.921135
cg17022362	KCNQ2	3785	20	62084833	-5.13985	4.35e-07	0.000377316	-0.146728	0.883424	1.00518
cg11923631	AIRE	326	21	45705721	-5.13476	4.46e-07	0.000384664	1.21711	0.224316	0.867133
cg01867395	PAX6	5080	11	31839628	-5.13427	4.47e-07	0.000383276	-0.824023	0.410444	0.950775
cg02994956	NEFH	4744	22	29876534	-5.12757	4.62e-07	0.000393909	-1.73804	0.083014	0.702663
cg14062468	SYN3	8224	22	33453893	-5.1168	4.88e-07	0.000413107	1.935	0.0537322	0.633371
cg11085282		0	22	46262203	-5.11632	4.89e-07	0.000411641	NA	NA	NA
cg07000514	C7orf50	84310	7	1090232	-5.11328	4.96e-07	0.000415436	-0.355723	0.722245	1.00117
cg19326876	ATP10A	57194	15	26107658	-5.10885	5.07e-07	0.000419742	-2.20392	0.0281291	0.525093
cg19013391	ADCY5	111	3	123166774	-5.09941	5.32e-07	0.000437311	0.571587	0.567939	0.979532
cg02740061	KIAA0415	9907	7	4828519	-5.09378	5.47e-07	0.000447086	0.881203	0.378765	0.938085
cg06511917	PTF1A	256297	10	23482255	-5.09231	5.51e-07	0.000447759	1.67546	0.094666	0.731894
cg24937747	IRX4	50805	5	1882902	-5.09151	5.53e-07	0.000447002	-0.373	0.709356	1.00141
cg21741220		0	11	19367175	-5.08466	5.72e-07	0.00045977	NA	NA	NA
cg23409374	SLC17A7	57030	19	49934742	-5.08084	5.83e-07	0.000465902	-0.914281	0.361149	0.932276
cg14258623		0	6	1384591	-5.07932	5.87e-07	0.000466799	NA	NA	NA
cg15802263	CACNG6	59285	19	54515245	-5.07909	5.88e-07	0.000464716	0.564453	0.572779	0.981642
cg14260377		0	9	44227210	-5.07879	5.89e-07	0.00046285	NA	NA	NA
cg13389502	HIC1	3090	17	1961440	-5.06383	6.34e-07	0.000495532	-1.31518	0.189242	0.838358
cg24937727	RGL3	57139	19	11517079	-5.05437	6.64e-07	0.000516328	-1.06284	0.288531	0.910802
cg02953927	PDIA3;CATSPER2P1	2923	15	44038812	-5.05032	6.77e-07	0.000523837	-0.00143047	0.998859	0.999606
cg20451131	NHS	4810	X	17673726	-5.04744	6.87e-07	0.000528423	-2.31045	0.0213984	0.477566
cg05973455		0	4	186048542	-5.0458	6.92e-07	0.000529836	NA	NA	NA
cg06704518	GATA4	2626	8	11565530	-5.029	7.52e-07	0.000572276	1.24894	0.212457	0.858117
cg25184038	GIGYF1	64599	7	100285074	-5.02847	7.54e-07	0.000570699	0.495591	0.62047	0.988166
cg07212778	C1QL2	165257	2	119916510	-5.02758	7.57e-07	0.000570164	-0.276589	0.782246	1.00745
cg20584474		0	6	1515696	-5.02405	7.7e-07	0.000577059	NA	NA	NA
cg18844589	RBM44	375316	2	238707052	-5.0239	7.71e-07	0.000574451	-0.907059	0.364951	0.933809
cg13784474	C4orf44	345222	4	3251105	-5.01881	7.9e-07	0.000585879	-0.233703	0.815341	1.00583
cg07502389	NEFM	4741	8	24771259	-5.01238	8.16e-07	0.000601442	0.254085	0.799568	1.00766
cg24024660		0	7	99195788	-5.00051	8.64e-07	0.000634025	NA	NA	NA
cg24399122	COL9A1	1297	6	70992907	-4.99973	8.67e-07	0.00063318	-1.69044	0.0917629	0.722521
cg13786089	ZFR2	23217	19	3869086	-4.98537	9.3e-07	0.000675577	-0.0504415	0.959797	0.990367
cg07236812	SNPH	9751	20	1286558	-4.96845	1.01e-06	0.000729701	-2.14833	0.0323194	0.552014
cg20129035	GPR123	84435	10	134918781	-4.9669	1.02e-06	0.000731507	-0.443744	0.65748	0.99384
cg03697809		0	X	106750775	-4.96527	1.03e-06	0.000733582	NA	NA	NA
cg23331421	ZNF536	9745	19	30866202	-4.96355	1.03e-06	0.000736041	-1.37341	0.170434	0.822524
cg14778721	COL18A1	80781	21	46912423	-4.95846	1.06e-06	0.000750663	-0.790008	0.430016	0.956512
cg22884541	BHLHA15	168620	7	97841864	-4.95119	1.1e-06	0.000773687	-1.19187	0.234057	0.875958
cg20539961	NCK2	8440	2	106497812	-4.94286	1.14e-06	0.000797555	0.890941	0.373524	0.938296
cg01022939	PRR23C	389152	3	138764038	-4.93154	1.21e-06	0.000830126	-0.125083	0.900524	1.00399
cg05617469	ZIC5	85416	13	100624281	-4.92989	1.22e-06	0.000832738	-0.72808	0.467013	0.965064
cg21194209	NFIC	4782	19	3452609	-4.92654	1.24e-06	0.000842251	-3.43585	0.000655936	0.0818331
cg14320519		0	7	155898257	-4.91788	1.29e-06	0.000865647	NA	NA	NA
cg21287054	TTYH1	57348	19	54928012	-4.91418	1.31e-06	0.000877046	0.574283	0.566116	0.979246
cg21161766		0	19	39756248	-4.88977	1.48e-06	0.000981399	NA	NA	NA
cg19847936	SLC45A1	50651	1	8385896	-4.88609	1.5e-06	0.000989609	-1.17425	0.241028	0.87816
cg09424759	SLC35F3	148641	1	234040781	-4.87992	1.55e-06	0.0010145	-0.894271	0.371743	0.935928
cg26333652	IRX2	153572	5	2750758	-4.87575	1.58e-06	0.00103021	1.14442	0.25317	0.887157
cg05255095		0	7	1370661	-4.87454	1.59e-06	0.00103143	NA	NA	NA
cg10364040	HOXD10	3236	2	176981064	-4.87051	1.62e-06	0.00104195	-1.54865	0.122297	0.775398
cg11763509	BMP8A	353500	1	39958005	-4.86572	1.66e-06	0.00106121	0.157553	0.874893	1.00573
cg10832938	SIX3	6496	2	45170365	-4.86302	1.68e-06	0.00106537	-0.683266	0.494855	0.967175
cg25720578	RYR1	6261	19	38993211	-4.8599	1.7e-06	0.00107651	-0.539711	0.589712	0.984046
cg12026967	GATA6	2627	18	19780728	-4.85757	1.72e-06	0.00108369	1.14535	0.252786	0.886739
cg04367345	ALX4	60529	11	44332636	-4.85351	1.75e-06	0.00109999	-0.288273	0.773295	1.00677
cg24718197		0	17	79485709	-4.85084	1.78e-06	0.00110915	NA	NA	NA
cg00126638	HLA-G	3135	6	29795583	-4.84456	1.83e-06	0.00113777	-0.24158	0.809236	1.00627
cg01815671	CCDC37	348807	3	126113663	-4.84288	1.85e-06	0.00113696	1.55534	0.120699	0.774058
cg12760573	KCNK17	89822	6	39271517	-4.83972	1.87e-06	0.00114919	0.418981	0.675467	0.997458
cg01518025		0	11	1983125	-4.83743	1.89e-06	0.00115677	NA	NA	NA
cg13570972	PAX6	5080	11	31839632	-4.83562	1.91e-06	0.00116176	-0.824023	0.410444	0.950775
cg00049047	GDNF	2668	5	37838425	-4.8282	1.98e-06	0.00119824	-1.36016	0.174587	0.82473
cg11402363	ADCYAP1	116	18	908505	-4.82212	2.04e-06	0.00122802	-1.68778	0.0922731	0.723418
cg01953240	LOC146336;SSTR5	0	16	1129666	-4.82192	2.04e-06	0.00122398	NA	NA	NA
cg19704558	LHX1	3975	17	35296732	-4.81948	2.06e-06	0.00123296	-0.397903	0.690925	1.00108
cg25417675		0	6	31651059	-4.81865	2.07e-06	0.00123268	NA	NA	NA
cg05064106	MOV10L1	54456	22	50528213	-4.79857	2.28e-06	0.00134962	-1.51546	0.130489	0.781919
cg24854181		0	5	6823241	-4.79716	2.29e-06	0.001353	NA	NA	NA
cg22247495	PRKAR1B	5575	7	589215	-4.79116	2.36e-06	0.00138598	-0.279216	0.780231	1.0066
cg04305427	KIFC3	3801	16	57794811	-4.79029	2.37e-06	0.00138594	-2.02857	0.043199	0.591073
cg10454327		0	16	85204789	-4.78989	2.37e-06	0.00138288	NA	NA	NA
cg20823529	PCGF3	10336	4	730453	-4.78924	2.38e-06	0.00138145	-0.431374	0.666441	0.996067
cg09936142	KRI1	65095	19	10668400	-4.78722	2.4e-06	0.00138901	-0.237467	0.812422	1.00699
cg07645486	HAS1	3036	19	52217022	-4.78696	2.4e-06	0.00138505	-1.01549	0.310517	0.919512
cg06000994	ZNF536	9745	19	30866194	-4.78147	2.47e-06	0.00141553	-1.37341	0.170434	0.822524
cg13762359	FAM184B	27146	4	17710804	-4.77962	2.49e-06	0.00142218	-0.953592	0.340896	0.922187
cg24936179	ZBTB46	140685	20	62398989	-4.77676	2.52e-06	0.00142997	-0.794403	0.427457	0.954307
cg14280947	ZBTB43	23099	9	129595523	-4.77262	2.57e-06	0.00145221	0.683537	0.494684	0.967311
cg04526209		0	19	3871035	-4.76725	2.64e-06	0.0014834	NA	NA	NA
cg00319912	FBXO17	115290	19	39441002	-4.76613	2.65e-06	0.00148529	-0.832822	0.405468	0.949876
cg15643428	NFATC1	4772	18	77171872	-4.76474	2.67e-06	0.0014892	-1.96021	0.0507016	0.620214
cg07408835	PCDHAC1;PCDHA7;PCDHA12;PCDHA6;PCDHA10;PCDHA4;PCDHA11;PCDHA8;PCDHA1;PCDHA2;PCDHA9;PCDHA13;PCDHA5;PCDHA3	56135	5	140306377	-4.7646	2.67e-06	0.00148431	0.838806	0.402106	0.950759
cg25535897	C19orf63	284361	19	50984040	-4.76459	2.67e-06	0.00147864	0.198513	0.84275	1.00525
cg19546583		0	19	16022523	-4.76353	2.68e-06	0.00148024	NA	NA	NA
cg03112087	RNF150	57484	4	142053720	-4.7614	2.71e-06	0.00148926	-1.38712	0.166219	0.817499
cg12028548	TCF15	6939	20	590799	-4.759	2.74e-06	0.00150033	-0.461774	0.644508	0.990935
cg21415530	KCNK9	51305	8	140715802	-4.75837	2.75e-06	0.001499	1.69233	0.0914036	0.722524
cg09214456	CAMK2B	816	7	44279245	-4.75594	2.78e-06	0.00151038	2.24484	0.0253531	0.512316
cg00976097	AHRR	57491	5	421733	-4.75435	2.8e-06	0.00151588	-0.668384	0.504294	0.969121
cg13369325		0	6	5994956	-4.75283	2.82e-06	0.00152091	NA	NA	NA
cg20692730	ATP2A3	489	17	3844423	-4.74834	2.88e-06	0.00154147	-2.0721	0.0389301	0.585731
cg06148736		0	22	18985691	-4.74395	2.94e-06	0.00156752	NA	NA	NA
cg24556441	SYN3	8224	22	33453994	-4.74382	2.94e-06	0.00156265	1.935	0.0537322	0.633371
cg11293190	PLK5P	126520	19	1523856	-4.73975	3e-06	0.00158669	0.272703	0.78523	1.00832
cg14643892	C12orf56	115749	12	64784070	-4.7382	3.02e-06	0.00159227	1.28118	0.200913	0.850301
cg24304658	KCNK3	3777	2	26950770	-4.72647	3.19e-06	0.00167552	0.950139	0.342645	0.922694
cg06008912	TMEFF2	23671	2	193059645	-4.72092	3.27e-06	0.00171303	4.66637	4.25538e-06	0.00161271
cg03119454	RPTOR	57521	17	78850480	-4.71949	3.3e-06	0.00171822	0.613079	0.540191	0.974604
cg15144016	GRM2	2912	3	51749782	-4.7192	3.3e-06	0.0017142	0.597796	0.550332	0.974519
cg05206884	SYN3	8224	22	33454324	-4.71852	3.31e-06	0.00171341	1.935	0.0537322	0.633371
cg26298294	POLS	11044	5	6755150	-4.71784	3.32e-06	0.00171259	0.116631	0.907214	1.00299
cg26071680	SAV1	60485	14	51134702	-4.71475	3.37e-06	0.0017311	-1.77879	0.0760732	0.680626
cg20585038		0	15	89148933	-4.71241	3.41e-06	0.00174369	NA	NA	NA
cg16823042	AGAP2;LOC100130776	116986	12	58119992	-4.7083	3.47e-06	0.00177097	-0.353308	0.724054	1.00133
cg04781741		0	7	151826130	-4.7069	3.49e-06	0.00177612	NA	NA	NA
cg00891278	CCDC37	348807	3	126113784	-4.70362	3.55e-06	0.00179697	1.55534	0.120699	0.774058
cg27251412	AIRE	326	21	45705740	-4.70263	3.56e-06	0.00179882	1.21711	0.224316	0.867133
cg01844642	GPR62	118442	3	51989764	-4.70187	3.58e-06	0.00179875	0.688304	0.491682	0.965954
cg11574055	CD58	965	1	117077116	-4.6927	3.73e-06	0.00187022	0.0776984	0.938109	0.998985
cg06407434	LARGE	9215	22	34046529	-4.69249	3.74e-06	0.00186552	-0.817559	0.414121	0.950524
cg18857768	OBSCN	84033	1	228503801	-4.68726	3.83e-06	0.00190446	-0.562399	0.574176	0.981439
cg08966208	HCCA2;LOC402778	81532	11	1769409	-4.6816	3.93e-06	0.00194812	-1.00905	0.313592	0.921823
cg12591689		0	6	168633845	-4.68086	3.94e-06	0.00194805	NA	NA	NA
cg09510531	AIRE	326	21	45705742	-4.68047	3.95e-06	0.00194484	1.21711	0.224316	0.867133
cg10351617		0	21	47580738	-4.67626	4.03e-06	0.0019761	NA	NA	NA
cg00300908	C15orf27	123591	15	76484102	-4.66495	4.24e-06	0.00207481	0.135626	0.892189	1.00468
cg05812950	CSRP1	1465	1	201476362	-4.66058	4.33e-06	0.00210968	-2.96611	0.0032065	0.203173
cg27183726	CHST8	64377	19	34112306	-4.65532	4.43e-06	0.00215398	0.730789	0.465358	0.964821
cg15254559		0	7	27292145	-4.65091	4.52e-06	0.0021906	NA	NA	NA
cg19726408	SH3PXD2A	9644	10	105428651	-4.64847	4.58e-06	0.00220781	-0.352677	0.724527	1.0015
cg05732750		0	7	6704045	-4.64392	4.67e-06	0.00224678	NA	NA	NA
cg13303069	TCF7L1	83439	2	85361842	-4.6372	4.82e-06	0.00230161	-0.902436	0.367397	0.933882
cg06564132	PKN1	5585	19	14552177	-4.63656	4.83e-06	0.00230064	-1.31304	0.189961	0.839137
cg06404662	KCNQ2	3785	20	62038206	-4.63228	4.93e-06	0.00233836	-0.146728	0.883424	1.00518
cg15972301	TTYH1	57348	19	54928185	-4.63154	4.95e-06	0.00233857	0.574283	0.566116	0.979246
cg22911477		0	2	132440043	-4.62943	4.99e-06	0.00235339	NA	NA	NA
cg26468833	TNNT3	7140	11	1950554	-4.62476	5.1e-06	0.00239631	-0.511664	0.609184	0.987895
cg24948406	HOXB1	3211	17	46608268	-4.6223	5.16e-06	0.00241545	-0.281673	0.778348	1.00701
cg01981606	JPH3	57338	16	87678214	-4.62147	5.18e-06	0.00241672	0.627081	0.530983	0.971783
cg09603935	VWA1	64856	1	1375448	-4.61598	5.31e-06	0.00246991	-3.25123	0.00125167	0.117482
cg26916576	GPR68	8111	14	91700557	-4.61304	5.38e-06	0.00249521	-2.90481	0.00388961	0.228441
cg22450968		0	7	156871234	-4.61285	5.39e-06	0.00248922	NA	NA	NA
cg09502866	KCNQ1DN	55539	11	2890473	-4.61248	5.4e-06	0.00248533	-0.297274	0.76642	1.00788
cg15092343	MSX1	4487	4	4860061	-4.61035	5.45e-06	0.0025016	-1.92964	0.0543957	0.635228
cg11254426	MMP21	118856	10	127464165	-4.60716	5.53e-06	0.00253008	-0.804955	0.421349	0.950175
cg08108333		0	7	157320662	-4.60638	5.55e-06	0.00253098	NA	NA	NA
cg15224023	NFIC	4782	19	3456297	-4.59705	5.79e-06	0.00263243	-3.43585	0.000655936	0.0818331
cg21248554	KRTCAP3	200634	2	27665150	-4.59455	5.86e-06	0.00265406	0.580174	0.562141	0.976407
cg17384380		0	10	102419209	-4.59141	5.94e-06	0.00268362	NA	NA	NA
cg24369989	CHRNB4	1143	15	78933807	-4.58708	6.06e-06	0.00272836	-0.0398327	0.968247	0.991346
cg09888447	MAD1L1	8379	7	2044584	-4.58339	6.16e-06	0.00276567	-0.1097	0.912705	1.00151
cg07009463	WNT7B	7477	22	46319013	-4.57606	6.37e-06	0.00284134	-0.987408	0.324071	0.919001
cg24506363	CHRNA3	1136	15	78894296	-4.57289	6.46e-06	0.00287339	-1.3094	0.191189	0.840865
cg18277764	CHL1	10752	3	239188	-4.57021	6.54e-06	0.00289948	-1.62101	0.105845	0.747015
cg00812833	PLD5	200150	1	242687412	-4.56862	6.59e-06	0.00291137	1.73722	0.0831585	0.702702
cg07699312	LOC642852	642852	21	46715205	-4.5638	6.73e-06	0.00296637	-0.532688	0.594561	0.984937
cg09243106	SLC8A2	6543	19	47969156	-4.56323	6.75e-06	0.00296487	-0.865208	0.38747	0.943019
cg02160608	PSD4;LOC440839	23550	2	113956634	-4.55866	6.89e-06	0.00301746	1.84596	0.0656749	0.662222
cg23324123	ZNF526	116115	19	42730293	-4.55832	6.9e-06	0.00301273	-0.455725	0.648848	0.992443
cg26285749	PPM1F	9647	22	22288508	-4.55093	7.13e-06	0.00310554	0.0922929	0.926514	1.0014
cg21590264	GDNF	2668	5	37834850	-4.55061	7.14e-06	0.00310046	-1.36016	0.174587	0.82473
cg14225847	ARC	23237	8	143695343	-4.54844	7.22e-06	0.00312152	0.290367	0.771694	1.00671
cg00703441	RPH3AL	9501	17	123425	-4.5477	7.24e-06	0.0031224	-0.768752	0.442518	0.959148
cg08217545	NFIC	4782	19	3388013	-4.54602	7.29e-06	0.00313668	-3.43585	0.000655936	0.0818331
cg15108590	CBS	875	21	44494906	-4.54546	7.31e-06	0.00313515	-1.49725	0.135157	0.789866
cg04663285	B4GALNT4	338707	11	379455	-4.54456	7.34e-06	0.00313846	-0.6908	0.490113	0.96618
cg13633270		0	18	55095555	-4.54302	7.39e-06	0.00315084	NA	NA	NA
cg01572696	IDUA	3425	4	995849	-4.54165	7.44e-06	0.00316091	-1.37124	0.171109	0.822815
cg22065614	GLRB	2743	4	157997360	-4.53659	7.61e-06	0.00322419	-1.18324	0.237452	0.876256
cg04635735	CAMK2B	816	7	44259819	-4.53079	7.81e-06	0.00329966	2.24484	0.0253531	0.512316
cg15231989	AMZ1	155185	7	2742433	-4.52922	7.87e-06	0.00331315	-1.15037	0.250713	0.885341
cg26469586	H19	283120	11	2019626	-4.52786	7.92e-06	0.00332357	-1.19195	0.234026	0.876005
cg18954541	SLC13A3	64849	20	45279985	-4.52213	8.12e-06	0.00340023	0.715704	0.474614	0.965474
cg14241879	C7orf50	84310	7	1048922	-4.51888	8.24e-06	0.00344016	-0.355723	0.722245	1.00117
cg09688546	GLRB	2743	4	157997363	-4.51853	8.25e-06	0.00343542	-1.18324	0.237452	0.876256
cg20977794	TRIM9	114088	14	51560748	-4.51452	8.4e-06	0.00348769	1.24595	0.213551	0.860286
cg02494853	PCDH11Y	83259	Y	4868397	-4.51256	8.48e-06	0.00350824	-0.382446	0.702344	1.00116
cg18587340	EMILIN3	90187	20	39995654	-4.50982	8.58e-06	0.00354127	0.438014	0.661625	0.994939
cg19927508	COX6A2	1339	16	31439191	-4.50678	8.7e-06	0.00357943	-0.283035	0.777304	1.00709
cg24753061	GATA6	2627	18	19752362	-4.50663	8.71e-06	0.00357148	1.14535	0.252786	0.886739
cg01023703	BAIAP3	8938	16	1393766	-4.50634	8.72e-06	0.00356586	1.79618	0.0732607	0.674388
cg10358533	CHST8	64377	19	34114209	-4.50582	8.74e-06	0.00356396	0.730789	0.465358	0.964821
cg22364729	ESPNP	284729	1	17023008	-4.50506	8.77e-06	0.00356588	-1.23344	0.218172	0.86366
cg02511156	LOC283392;TRHDE	0	12	72666264	-4.50504	8.77e-06	0.00355603	NA	NA	NA
cg10835872	ZSWIM4	65249	19	13920075	-4.50396	8.81e-06	0.00356304	-0.920096	0.358106	0.9304
cg02393606	KNDC1	85442	10	135033364	-4.49946	8.99e-06	0.00362534	-1.06289	0.288505	0.910863
cg25649000	PTPRT	11122	20	41817903	-4.4944	9.2e-06	0.00369771	1.33681	0.182084	0.830837
cg15145174	POLS	11044	5	6755386	-4.49354	9.23e-06	0.00370157	0.116631	0.907214	1.00299
cg02190127	ADRA1D	146	20	4229231	-4.48458	9.61e-06	0.00384167	-0.354005	0.723531	1.00123
cg12496363	WFIKKN2	124857	17	48918089	-4.47785	9.9e-06	0.00394756	0.330665	0.74108	1.0036
cg15602633		0	10	134698661	-4.47248	1.01e-05	0.00403189	NA	NA	NA
cg03282345	SLC17A7	57030	19	49934577	-4.47216	1.02e-05	0.00402633	-0.914281	0.361149	0.932276
cg04457792		0	10	102473207	-4.472	1.02e-05	0.00401795	NA	NA	NA
cg18261877	OBSCN	84033	1	228468281	-4.46779	1.04e-05	0.00408264	-0.562399	0.574176	0.981439
cg17484733	TCF7L1	83439	2	85362030	-4.46549	1.05e-05	0.0041132	-0.902436	0.367397	0.933882
cg06936155		0	1	91192451	-4.46335	1.06e-05	0.00414096	NA	NA	NA
cg11950383	OLIG2	10215	21	34400072	-4.45754	1.08e-05	0.00423754	0.422408	0.672966	0.997284
cg04420349	SLC8A3	6547	14	70512963	-4.45702	1.09e-05	0.00423568	-1.09515	0.274145	0.901224
cg03554736	KIF1A	547	2	241719655	-4.45695	1.09e-05	0.00422539	1.37632	0.169533	0.821332
cg18267374	NEFM	4741	8	24771273	-4.4544	1.1e-05	0.00426189	0.254085	0.799568	1.00766
cg27545697		0	Y	10037049	-4.45416	1.1e-05	0.00425484	NA	NA	NA
cg06358171	SSBP3	23648	1	54822008	-4.453	1.11e-05	0.00426525	0.161432	0.871839	1.00596
cg21331088	ADCYAP1	116	18	908290	-4.44952	1.12e-05	0.00431982	-1.68778	0.0922731	0.723418
cg19530281		0	8	1113432	-4.44492	1.15e-05	0.0043849	NA	NA	NA
cg13197216		0	8	23567658	-4.44385	1.15e-05	0.00439394	NA	NA	NA
cg12731325	DNAH2	146754	17	7671330	-4.44282	1.16e-05	0.00440224	-0.695977	0.486868	0.966328
cg07515989		0	1	43250763	-4.44038	1.17e-05	0.00442637	NA	NA	NA
cg09761959		0	2	2754829	-4.43768	1.18e-05	0.00446764	NA	NA	NA
cg13652892	VASH1	22846	14	77242311	-4.43482	1.2e-05	0.0045126	-0.865552	0.387282	0.943131
cg19505136	CHL1	10752	3	239506	-4.43073	1.22e-05	0.00458268	-1.62101	0.105845	0.747015
cg26501450		0	19	4038221	-4.42956	1.23e-05	0.00459421	NA	NA	NA
cg09619624		0	22	18985632	-4.42726	1.24e-05	0.00462896	NA	NA	NA
cg14528437	KCNT1	57582	9	138660693	-4.42454	1.25e-05	0.00466043	0.807558	0.41985	0.949996
cg18069174		0	18	77314033	-4.42301	1.26e-05	0.00467968	NA	NA	NA
cg25032595	CLDN10	9071	13	96204978	-4.42221	1.27e-05	0.00468409	-0.30515	0.760419	1.00651
cg20185461	COMP	1311	19	18899082	-4.4179	1.29e-05	0.00476149	-1.63671	0.102519	0.741789
cg26365925		0	3	44063315	-4.41711	1.3e-05	0.00476584	NA	NA	NA
cg12284521		0	6	34113943	-4.41708	1.3e-05	0.00475407	NA	NA	NA
cg23666945	TRIM71	131405	3	32861150	-4.41417	1.31e-05	0.00480317	-0.527852	0.59791	0.985364
cg16309243	PLEKHG4B	153478	5	181808	-4.41357	1.32e-05	0.00480349	-0.538882	0.590284	0.984264
cg08805497	AGAP1	116987	2	236673911	-4.41107	1.33e-05	0.00484413	2.55536	0.0109965	0.360906
cg00699029	HOXC10	3226	12	54379609	-4.40994	1.34e-05	0.00485585	1.2266	0.220731	0.866108
cg06656994	FAM163A	148753	1	179713176	-4.4046	1.37e-05	0.00495866	-1.23676	0.21694	0.862351
cg00543604		0	X	13397493	-4.4028	1.38e-05	0.0049853	NA	NA	NA
cg23287404	FZR1	51343	19	3531808	-4.40027	1.4e-05	0.00502814	-0.305616	0.760064	1.00644
cg23341223	FBXO39	162517	17	6679254	-4.39841	1.41e-05	0.00505652	-0.545221	0.585922	0.983604
cg07224531	B3GNT9	84752	16	67183225	-4.39769	1.41e-05	0.00505981	-0.237595	0.812324	1.00699
cg17158414	KRTCAP3	200634	2	27665306	-4.39324	1.44e-05	0.00514663	0.580174	0.562141	0.976407
cg06795963	WNK4	65266	17	40932359	-4.3886	1.47e-05	0.00523928	0.637738	0.524029	0.971807
cg12689608	SSTR5;LOC146336	6755	16	1130130	-4.38821	1.47e-05	0.00523508	-0.689621	0.490854	0.966028
cg17091733		0	15	41778394	-4.38815	1.47e-05	0.00522344	NA	NA	NA
cg00762185	DIO3	1735	14	102028737	-4.38518	1.49e-05	0.00527864	-1.31661	0.188763	0.837715
cg20979823		0	6	1515797	-4.38368	1.5e-05	0.00530015	NA	NA	NA
cg12873454	KIAA1026	0	1	14924611	-4.38062	1.52e-05	0.00535841	NA	NA	NA
cg12300353	KCTD8	386617	4	44450358	-4.38054	1.52e-05	0.00534701	-0.0378851	0.969799	0.99162
cg06984848		0	16	85320722	-4.37256	1.58e-05	0.00550965	NA	NA	NA
cg27200446	MDFI	4188	6	41606439	-4.37218	1.58e-05	0.00550514	-2.05579	0.0404857	0.587995
cg09739017	CACNG1	786	17	65040854	-4.37163	1.58e-05	0.00550487	-0.511202	0.609506	0.987461
cg23906459		0	8	143530680	-4.36768	1.61e-05	0.00557346	NA	NA	NA
cg17479060		0	17	81016185	-4.36643	1.62e-05	0.00559023	NA	NA	NA
cg16243756	TUSC3	7991	8	15397637	-4.36598	1.62e-05	0.00558775	-2.05894	0.0401812	0.58825
cg08223771	STAU2	27067	8	74361268	-4.36518	1.63e-05	0.00559365	-1.43121	0.153192	0.805081
cg18882670		0	X	118357084	-4.36229	1.65e-05	0.00565096	NA	NA	NA
cg24173182	HIC1	3090	17	1961286	-4.36122	1.66e-05	0.00566386	-1.31518	0.189242	0.838358
cg13101087	GALNT13	114805	2	154729059	-4.35574	1.7e-05	0.00577286	1.37224	0.170799	0.822111
cg02916272	HCCA2;LOC402778	81532	11	1769443	-4.35375	1.71e-05	0.00580929	-1.00905	0.313592	0.921823
cg26987597	FOXF2	2295	6	1391207	-4.35048	1.73e-05	0.00586459	-3.43468	0.000658666	0.0816665
cg16669339	SH3PXD2A	9644	10	105428621	-4.35038	1.74e-05	0.00585312	-0.352677	0.724527	1.0015
cg01013590	SCTR	6344	2	120281719	-4.34994	1.74e-05	0.00585038	-0.20953	0.834147	1.00617
cg12648671		0	18	77377538	-4.34855	1.75e-05	0.005872	NA	NA	NA
cg07071379	C20orf46	55321	20	1161626	-4.34621	1.77e-05	0.0059181	-0.485058	0.627915	0.988889
cg05290058	KCNQ1DN	55539	11	2890551	-4.3457	1.77e-05	0.00591724	-0.297274	0.76642	1.00788
cg09507790	GATA6	2627	18	19752343	-4.34384	1.79e-05	0.00595131	1.14535	0.252786	0.886739
cg10837783	LCK	3932	1	32741454	-4.3422	1.8e-05	0.00598007	-3.28729	0.00110578	0.111612
cg13896192	HPCAL4	51440	1	40149432	-4.34054	1.81e-05	0.0060091	0.137715	0.890538	1.00519
cg09234518	NEFM	4741	8	24771114	-4.33734	1.84e-05	0.006079	0.254085	0.799568	1.00766
cg15433996	SLFNL1	200172	1	41483419	-4.3341	1.86e-05	0.00615089	1.0302	0.303572	0.916787
cg05184456	SCRT1	83482	8	145557639	-4.33334	1.87e-05	0.00615665	3.1159	0.00197323	0.154219
cg16717549	AIRE	326	21	45705699	-4.33222	1.88e-05	0.00617257	1.21711	0.224316	0.867133
cg17291500	PDGFA	5154	7	550508	-4.32752	1.92e-05	0.00628504	-1.74754	0.0813516	0.695923
cg11896587	FBXO17	115290	19	39440734	-4.32613	1.93e-05	0.00630832	-0.832822	0.405468	0.949876
cg06893273		0	17	46604774	-4.32337	1.95e-05	0.00636962	NA	NA	NA
cg11326255	MATK	4145	19	3786583	-4.32158	1.97e-05	0.00640426	-1.49904	0.134695	0.790613
cg03932361	RAB37	326624	17	72667394	-4.32084	1.97e-05	0.0064103	0.174206	0.861796	1.00546
cg16898239	GALR2	8811	17	74070682	-4.31908	1.99e-05	0.00644446	0.164549	0.869386	1.00602
cg08246619	KCNQ1DN	55539	11	2890454	-4.31862	1.99e-05	0.00644253	-0.297274	0.76642	1.00788
cg24242968	LRRC33	375387	3	196387120	-4.31734	2e-05	0.00646362	-1.41347	0.158335	0.810891
cg21494097	LARGE	9215	22	34046427	-4.3165	2.01e-05	0.00647263	-0.817559	0.414121	0.950524
cg26554547		0	7	1370486	-4.31646	2.01e-05	0.00645914	NA	NA	NA
cg03734874	TMEM179	388021	14	105071382	-4.31223	2.05e-05	0.00656333	1.69823	0.0902825	0.721326
cg16459364	NEFM	4741	8	24771125	-4.31201	2.05e-05	0.00655482	0.254085	0.799568	1.00766
cg17398057	TFR2	7036	7	100218512	-4.3112	2.06e-05	0.00656297	-2.04886	0.0411622	0.589298
cg20116159	NHS	4810	X	17674384	-4.30994	2.07e-05	0.00658414	-2.31045	0.0213984	0.477566
cg05051043	SLC35F3	148641	1	234040765	-4.30937	2.07e-05	0.00658559	-0.894271	0.371743	0.935928
cg27353308	BNIP3	664	10	133796559	-4.30759	2.09e-05	0.00662158	0.721144	0.471264	0.96462
cg26360732	PPP1R2	5504	3	195269834	-4.30533	2.11e-05	0.00667161	0.814218	0.41603	0.951319
cg19513207		0	3	142666476	-4.30381	2.12e-05	0.00670059	NA	NA	NA
cg01603456		0	5	3324867	-4.30372	2.12e-05	0.00668844	NA	NA	NA
cg05502103	PRKAR1B	5575	7	588936	-4.30293	2.13e-05	0.00669642	-0.279216	0.780231	1.0066
cg07178006		0	11	20184718	-4.30167	2.14e-05	0.00671782	NA	NA	NA
cg00470007		0	12	132930066	-4.30096	2.15e-05	0.00672373	NA	NA	NA
cg08215400	CD163L1	283316	12	7592407	-4.29685	2.19e-05	0.00682885	-2.65896	0.00816964	0.327536
cg05256902	KLF3	51274	4	38690342	-4.29548	2.2e-05	0.00685414	-0.852193	0.394644	0.945357
cg03512426		0	10	131763683	-4.29538	2.2e-05	0.00684229	NA	NA	NA
cg03049767	B4GALNT4	338707	11	379296	-4.28939	2.26e-05	0.00699014	-0.6908	0.490113	0.96618
cg11017318		0	14	62279992	-4.28687	2.28e-05	0.00705112	NA	NA	NA
cg02288564	SLC17A7	57030	19	49934404	-4.28491	2.3e-05	0.00709543	-0.914281	0.361149	0.932276
cg23491743	SNED1	25992	2	241989271	-4.28359	2.32e-05	0.0071201	-1.23251	0.218522	0.863682
cg15014975	RUNX3	864	1	25257547	-4.28344	2.32e-05	0.0071093	-2.84388	0.00469778	0.250956
cg00056489	SH2B3	10019	12	111856652	-4.28235	2.33e-05	0.00712756	-1.06025	0.289706	0.909794
cg03692991		0	22	38434974	-4.28197	2.33e-05	0.00712372	NA	NA	NA
cg26160153	TCF23	150921	2	27373014	-4.28127	2.34e-05	0.00711474	1.87999	0.0608747	0.652818
cg05939380	RHCG	51458	15	90030316	-4.28108	2.34e-05	0.00710516	-0.432038	0.665959	0.995865
cg24006341	ZCCHC13	389874	X	73524029	-4.27992	2.35e-05	0.0071255	-0.0728188	0.941989	0.998827
cg03355204	GRIN3B	116444	19	1008063	-4.27612	2.39e-05	0.00722741	-0.0516549	0.958831	0.996847
cg07562120	TCF3	6929	19	1614570	-4.27537	2.4e-05	0.0072352	0.143908	0.88565	1.00555
cg14083421	CAMTA1	23261	1	7122639	-4.27491	2.4e-05	0.00723402	-0.270122	0.787213	1.00803
cg24584252		0	16	54155954	-4.27414	2.41e-05	0.0072429	NA	NA	NA
cg25512936		0	3	44041103	-4.27254	2.43e-05	0.00727712	NA	NA	NA
cg08168075	SEC1	653677	19	49184151	-4.27251	2.43e-05	0.00726303	-0.208825	0.834697	1.00641
cg01244243	TTLL8	164714	22	50470419	-4.26886	2.47e-05	0.00736185	-0.154169	0.877558	1.00551
cg06092502		0	1	42611687	-4.26779	2.48e-05	0.00738012	NA	NA	NA
cg03080142		0	8	50822801	-4.26743	2.48e-05	0.00737615	NA	NA	NA
cg24442454	MDGA1	266727	6	37616803	-4.26562	2.5e-05	0.00741796	-0.920853	0.357711	0.929735
cg15288618	RBP1	5947	3	139257775	-4.2617	2.54e-05	0.00752797	0.458667	0.646736	0.99231
cg14602530		0	4	4859772	-4.26139	2.55e-05	0.00752216	NA	NA	NA
cg05397202	PUSL1	126789	1	1245040	-4.26006	2.56e-05	0.00754937	-1.3623	0.173911	0.824834
cg22816091		0	1	42611670	-4.25958	2.57e-05	0.00754936	NA	NA	NA
cg27595860	SCRT1	83482	8	145557636	-4.25902	2.57e-05	0.0075519	3.1159	0.00197323	0.154219
cg11557492	SSC5D	284297	19	56002240	-4.25683	2.6e-05	0.00760724	-2.10943	0.0355612	0.567341
cg14405924	EBF3	253738	10	131758112	-4.25556	2.61e-05	0.00763274	-1.23561	0.217365	0.863017
cg07223632	CELSR1	9620	22	46930499	-4.25498	2.62e-05	0.00763599	-2.49172	0.0131383	0.386378
cg23970523	FKBP8	23770	19	18654267	-4.25411	2.63e-05	0.0076489	-0.303784	0.761459	1.00669
cg06194421	SLFN5	162394	17	33570128	-4.25376	2.63e-05	0.00764451	-0.133112	0.894175	1.00444
cg05576828	DUSP4	1846	8	29194717	-4.25302	2.64e-05	0.00765326	-2.57475	0.010409	0.353764
cg03759824		0	8	50822565	-4.2525	2.65e-05	0.00765451	NA	NA	NA
cg10552592	KLHDC4	54758	16	87743108	-4.25035	2.67e-05	0.0077094	0.147129	0.883108	1.00528
cg19456275	NFIC	4782	19	3452680	-4.24728	2.71e-05	0.0077955	-3.43585	0.000655936	0.0818331
cg23254302	PLIN5	440503	19	4531722	-4.2456	2.72e-05	0.00783536	-1.03515	0.301257	0.915162
cg03658371	KCNH6	81033	17	61613152	-4.24336	2.75e-05	0.00789483	2.24513	0.0253344	0.512454
cg26750487	CR1L	1379	1	207818449	-4.2409	2.78e-05	0.00796194	-0.835836	0.403772	0.950225
cg24928391	SOX17	64321	8	55370336	-4.24053	2.78e-05	0.00795833	-0.726668	0.467877	0.964963
cg10938556		0	14	105126275	-4.23758	2.82e-05	0.00804293	NA	NA	NA
cg01449663	NTN1	9423	17	8926249	-4.23734	2.82e-05	0.0080349	-2.1896	0.0291611	0.530552
cg07847863	PCDH8	5100	13	53419963	-4.23514	2.85e-05	0.0080944	2.76057	0.0060498	0.287953
cg02898423		0	4	189081246	-4.23014	2.91e-05	0.00825166	NA	NA	NA
cg23361290	AMDHD1	144193	12	96350519	-4.22906	2.92e-05	0.0082732	-1.12093	0.263024	0.894683
cg00943186	MON1A	84315	3	49947793	-4.22086	3.03e-05	0.00854961	0.106553	0.9152	1.00173
cg16930254	AGPAT3	56894	21	45393416	-4.21997	3.04e-05	0.00856486	1.7015	0.0896678	0.718702
cg09984339	ATP10A	57194	15	26108674	-4.21943	3.05e-05	0.00856757	-2.20392	0.0281291	0.525093
cg20219457	DCLK1	9201	13	36705446	-4.21869	3.06e-05	0.0085774	-0.657794	0.511069	0.970901
cg04543938		0	6	28956426	-4.21758	3.07e-05	0.00860086	NA	NA	NA
cg10210715	PNLDC1	154197	6	160221411	-4.21503	3.1e-05	0.00867747	3.565	0.000410246	0.0601475
cg16501323	AIRE	326	21	45705618	-4.21381	3.12e-05	0.00870542	1.21711	0.224316	0.867133
cg04157263		0	17	37752991	-4.21013	3.17e-05	0.00882472	NA	NA	NA
cg26153631	HOXC10	3226	12	54379056	-4.20962	3.18e-05	0.00882653	1.2266	0.220731	0.866108
cg16939364	XKR4	114786	8	56015750	-4.20842	3.19e-05	0.00885397	-0.692116	0.489287	0.966924
cg14571130	APCDD1L	164284	20	57036565	-4.20389	3.25e-05	0.00900807	-1.38556	0.166694	0.819036
cg21192185	PLXNA1	5361	3	126708075	-4.20198	3.28e-05	0.00906337	-0.0077569	0.993815	0.998088
cg05613364	PLVAP	83483	19	17462862	-4.20069	3.3e-05	0.00909515	-2.33501	0.0200631	0.468589
cg10059660	KCTD8	386617	4	44450234	-4.1963	3.36e-05	0.00924764	-0.0378851	0.969799	0.99162
cg10795666	MLNR	2862	13	49794635	-4.1951	3.38e-05	0.00927647	-0.433366	0.664995	0.995386
cg12818557	MMP16	4325	8	89340139	-4.19313	3.4e-05	0.00933594	-0.855692	0.392707	0.945567
cg16567723	TMCO3	55002	13	114202683	-4.18969	3.45e-05	0.00945438	-1.90252	0.0578585	0.647075
cg14909614	TEAD3	7005	6	35454069	-4.18935	3.46e-05	0.00944945	0.124812	0.900738	1.0039
cg09364245	SBK2	646643	19	56047543	-4.18907	3.46e-05	0.00944283	-0.141903	0.887232	1.00507
cg22162323	PLEC1	5339	8	144990644	-4.1866	3.5e-05	0.00952337	-0.189461	0.849833	1.0057
cg16514818		0	2	242766284	-4.18084	3.59e-05	0.00973847	NA	NA	NA
cg06502755	LOC388965	0	2	84517950	-4.17543	3.67e-05	0.00994388	NA	NA	NA
cg16235748	ZC3H12D	340152	6	149772707	-4.17295	3.71e-05	0.0100287	0.641331	0.521694	0.970974
cg13731106		0	9	41936495	-4.17129	3.73e-05	0.01008	NA	NA	NA
cg05282641	RPL10L	140801	14	47121156	-4.16875	3.77e-05	0.0101687	0.966933	0.334192	0.922946
cg18194306	ATP10A	57194	15	26108817	-4.16685	3.8e-05	0.0102307	-2.20392	0.0281291	0.525093
cg04730882	HOXD9	3235	2	176986535	-4.16548	3.82e-05	0.0102706	-0.910206	0.363291	0.933247
cg27005794	LOC100287216;SH3RF3	0	2	109746251	-4.16425	3.84e-05	0.010304	NA	NA	NA
cg09361470	MRC2	9902	17	60744792	-4.16424	3.84e-05	0.0102851	-1.82813	0.0683144	0.66772
cg13954457	FBLL1	345630	5	167956819	-4.15931	3.92e-05	0.0104805	0.249458	0.803142	1.00692
cg22660933	HOXB1	3211	17	46608355	-4.15926	3.93e-05	0.0104627	-0.281673	0.778348	1.00701
cg07364396	CAMTA1	23261	1	7122541	-4.15891	3.93e-05	0.0104586	-0.270122	0.787213	1.00803
cg23887345	PTPRN2	5799	7	157453775	-4.15824	3.94e-05	0.0104685	0.404332	0.686196	0.99985
cg00299047	AMH	268	19	2252069	-4.15804	3.95e-05	0.0104576	0.279854	0.779741	1.00681
cg17826679	SLC44A2	57153	19	10736038	-4.15514	3.99e-05	0.0105661	-0.934068	0.350862	0.926317
cg08292483		0	11	1216466	-4.15448	4e-05	0.0105755	NA	NA	NA
cg00516881	HDGF2	84717	19	4493907	-4.15192	4.05e-05	0.0106699	0.594254	0.552696	0.975437
cg14871534	RPL10L	140801	14	47121158	-4.1509	4.07e-05	0.0106954	0.966933	0.334192	0.922946
cg13590180		0	11	1986191	-4.15047	4.07e-05	0.0106948	NA	NA	NA
cg02597153	KCNC1	3746	11	17793958	-4.14939	4.09e-05	0.0107236	1.10051	0.271806	0.900164
cg06518628	RIMS2	9699	8	104513704	-4.14836	4.11e-05	0.0107502	-0.160604	0.872491	1.00596
cg24366314	SLITRK5	26050	13	88329680	-4.14628	4.14e-05	0.0108243	-1.00164	0.317154	0.921904
cg04098339	SLC10A4	201780	4	48486087	-4.14623	4.15e-05	0.0108066	-0.076198	0.939302	0.998984
cg13557411	SEMA7A	8482	15	74703101	-4.14376	4.19e-05	0.0108986	-2.1171	0.0349007	0.564425
cg01847620	LAMA5	3911	20	60905922	-4.14141	4.23e-05	0.0109865	-2.22797	0.0264672	0.520685
cg18465133	JSRP1	126306	19	2252282	-4.14133	4.23e-05	0.0109698	-0.877449	0.380797	0.939297
cg05348366		0	1	19665184	-4.14095	4.24e-05	0.0109674	NA	NA	NA
cg24478803	C2orf70	339778	2	26786046	-4.13932	4.27e-05	0.0110223	-0.315172	0.752804	1.00557
cg06212213	PRKAR1B	5575	7	596202	-4.13919	4.27e-05	0.0110083	-0.279216	0.780231	1.0066
cg22047013	PLEKHG4B	153478	5	169593	-4.13816	4.29e-05	0.0110357	-0.538882	0.590284	0.984264
cg24056567	PSD3	23362	8	18871909	-4.1344	4.36e-05	0.0111902	-1.74949	0.081014	0.695108
cg20068535	AKAP12	9590	6	151560981	-4.13418	4.36e-05	0.0111799	-1.15307	0.249608	0.883924
cg03784353	ZNF232	7775	17	5026585	-4.13272	4.39e-05	0.011228	-0.164184	0.869674	1.00612
cg11752769	CR1L	1379	1	207818423	-4.13212	4.4e-05	0.0112359	-0.835836	0.403772	0.950225
cg07847030	TCF7L1	83439	2	85361959	-4.12989	4.44e-05	0.0113206	-0.902436	0.367397	0.933882
cg13360823	CACNG6	59285	19	54496353	-4.12878	4.46e-05	0.0113528	0.564453	0.572779	0.981642
cg08150843	PTPRS	5802	19	5237295	-4.1279	4.48e-05	0.0113743	-1.15726	0.247895	0.881588
cg18884237	GOLGA7	51125	8	41347795	-4.12665	4.5e-05	0.011413	-3.48587	0.000547835	0.0728729
cg13140167	SYN3	8224	22	33454504	-4.12603	4.51e-05	0.0114221	1.935	0.0537322	0.633371
cg12424785	GALNT13	114805	2	154728133	-4.12585	4.51e-05	0.0114104	1.37224	0.170799	0.822111
cg16020279	C21orf29	54084	21	45926753	-4.12259	4.58e-05	0.0115458	-0.294942	0.768199	1.00699
cg23443853	AP1M2	10053	19	10692029	-4.12151	4.6e-05	0.0115776	0.439429	0.6606	0.994366
cg01940336	SLC8A2	6543	19	47935484	-4.11971	4.63e-05	0.0116437	-0.865208	0.38747	0.943019
cg18964375		0	1	33772147	-4.11951	4.63e-05	0.0116331	NA	NA	NA
cg11979303		0	6	1379795	-4.11829	4.66e-05	0.0116714	NA	NA	NA
cg00977696		0	8	144854517	-4.11698	4.68e-05	0.011694	NA	NA	NA
cg05548508	RPTOR	57521	17	78775797	-4.11539	4.71e-05	0.0117508	0.613079	0.540191	0.974604
cg17137424	TRIM67	440730	1	231299352	-4.11167	4.79e-05	0.011913	-1.09211	0.275477	0.902205
cg21692666		0	1	17199302	-4.11138	4.79e-05	0.0119065	NA	NA	NA
cg04982922		0	6	27228330	-4.11006	4.82e-05	0.0119513	NA	NA	NA
cg14085606	STXBP1	6812	9	130454671	-4.10998	4.82e-05	0.0119346	-2.88485	0.00413917	0.235522
cg14537953	IL1F8	27177	2	113808683	-4.10907	4.84e-05	0.0119586	-0.512547	0.608566	0.98769
cg20594961		0	4	3773933	-4.1086	4.85e-05	0.0119613	NA	NA	NA
cg08372291	NHS	4810	X	17674041	-4.10578	4.91e-05	0.0120814	-2.31045	0.0213984	0.477566
cg05254946	RYR1	6261	19	39052112	-4.10269	4.97e-05	0.0122157	-0.539711	0.589712	0.984046
cg12799689	DOK6	220164	18	67067893	-4.10037	5.02e-05	0.0123125	-1.19865	0.23141	0.873048
cg05903444	IRX2;C5orf38	153572	5	2751041	-4.10023	5.02e-05	0.0122987	1.14442	0.25317	0.887157
cg20312228	CCDC37	348807	3	126113707	-4.1001	5.02e-05	0.0122837	1.55534	0.120699	0.774058
cg16209664	ZIC1	7545	3	147131146	-4.09991	5.03e-05	0.0122726	-0.369959	0.711619	1.00144
cg02730156		0	21	38069950	-4.09921	5.04e-05	0.0122871	NA	NA	NA
cg10057853	C21orf56	84221	21	47602702	-4.09887	5.05e-05	0.0122833	-2.47404	0.0137954	0.395849
cg03221366		0	12	131943548	-4.09727	5.08e-05	0.012344	NA	NA	NA
cg08056755	LOC146336	0	16	1116397	-4.09682	5.09e-05	0.0123459	NA	NA	NA
cg03921753	GSG1L	146395	16	28074670	-4.09106	5.21e-05	0.0126223	5.53974	5.66742e-08	3.34811e-05
cg07609788	EMILIN3	90187	20	39995652	-4.08872	5.27e-05	0.0127234	0.438014	0.661625	0.994939
cg12338417	TRIM71	131405	3	32860178	-4.08866	5.27e-05	0.0127048	-0.527852	0.59791	0.985364
cg14465344	LRRC14B	389257	5	192529	-4.08809	5.28e-05	0.0127129	0.877704	0.380659	0.939418
cg18888205		0	17	8908079	-4.08721	5.3e-05	0.0127377	NA	NA	NA
cg25903783		0	17	59475486	-4.08714	5.3e-05	0.0127202	NA	NA	NA
cg03492827		0	7	72838601	-4.08709	5.3e-05	0.0127015	NA	NA	NA
cg06675781	RPTOR	57521	17	78775635	-4.08686	5.31e-05	0.0126919	0.613079	0.540191	0.974604
cg24484352		0	17	42015961	-4.08658	5.31e-05	0.0126856	NA	NA	NA
cg11163620	GLRB	2743	4	157997554	-4.08451	5.36e-05	0.0127731	-1.18324	0.237452	0.876256
cg14356396	SIM2	6493	21	38081695	-4.08376	5.37e-05	0.0127911	-2.33197	0.0202242	0.470165
cg24543255		0	11	69683359	-4.0818	5.42e-05	0.0128734	NA	NA	NA
cg05168977	NPTX2	4885	7	98247142	-4.07999	5.46e-05	0.012927	1.27382	0.203506	0.851231
cg12534008	AMH	268	19	2252029	-4.07926	5.47e-05	0.0129443	0.279854	0.779741	1.00681
cg26675654		0	7	1269693	-4.07355	5.61e-05	0.0132309	NA	NA	NA
cg05371552	VIPR2	7434	7	158854564	-4.07334	5.61e-05	0.01322	-1.79948	0.0727363	0.673264
cg04171235		0	17	46604393	-4.0731	5.62e-05	0.0132111	NA	NA	NA
cg24161501	TCTEX1D1	200132	1	67218275	-4.07235	5.63e-05	0.0132305	-1.60833	0.108593	0.752397
cg07840143		0	5	3324860	-4.07136	5.66e-05	0.0132623	NA	NA	NA
cg17424101	TRNT1	51095	3	3169230	-4.06996	5.69e-05	0.0133171	-0.606634	0.544456	0.973121
cg18717423		0	3	125986716	-4.06969	5.7e-05	0.0133101	NA	NA	NA
cg27040696		0	5	2180252	-4.06804	5.73e-05	0.0133788	NA	NA	NA
cg07860213	PRDM14	63978	8	70982039	-4.06794	5.74e-05	0.0133624	-0.250312	0.802482	1.00672
cg14135852		0	X	118357181	-4.06652	5.77e-05	0.013419	NA	NA	NA
cg11355135	SLC5A7	60482	2	108602860	-4.06554	5.79e-05	0.0134512	-0.756794	0.449642	0.962335
cg05102794	ACSF3	197322	16	89167481	-4.06518	5.8e-05	0.0134494	2.73066	0.00661516	0.301982
cg23358612	UNCX	340260	7	1275258	-4.06136	5.89e-05	0.0136178	-0.0874019	0.930398	0.99941
cg12499872	TEPP	374739	16	58019893	-4.06097	5.9e-05	0.0136177	-0.429522	0.667786	0.995928
cg08463758	EMILIN3	90187	20	39995649	-4.06036	5.92e-05	0.0136296	0.438014	0.661625	0.994939
cg12290671		0	7	99195819	-4.06024	5.92e-05	0.013614	NA	NA	NA
cg24318763	CLEC2L	154790	7	139208979	-4.05914	5.95e-05	0.0136536	0.815581	0.415251	0.950402
cg26248091	LOC100133612	0	1	3824232	-4.05869	5.96e-05	0.013657	NA	NA	NA
cg19164794	C17orf101	79701	17	80366881	-4.05539	6.04e-05	0.013821	-0.25898	0.795791	1.00758
cg16902190	SLC4A11	83959	20	3214756	-4.05463	6.06e-05	0.0138424	-1.57966	0.115016	0.765477
cg11882377	VPS28;NFKBIL2	51160	8	145654780	-4.05357	6.09e-05	0.01388	-0.934446	0.350667	0.926533
cg14644752	MMP16	4325	8	89340331	-4.05174	6.13e-05	0.0139624	-0.855692	0.392707	0.945567
cg19831957		0	19	46386030	-4.05142	6.14e-05	0.0139582	NA	NA	NA
cg07211292	C20orf160	140706	20	30618874	-4.04883	6.2e-05	0.0140625	-1.21252	0.226067	0.869381
cg17594047		0	4	100574653	-4.04454	6.31e-05	0.0142894	NA	NA	NA
cg16361966		0	10	124905786	-4.04284	6.36e-05	0.0143663	NA	NA	NA
cg25252777		0	19	56709056	-4.04036	6.42e-05	0.01449	NA	NA	NA
cg03069267		0	9	134699490	-4.04011	6.43e-05	0.0144819	NA	NA	NA
cg18735956		0	6	34113908	-4.0393	6.45e-05	0.0145068	NA	NA	NA
cg01532168	KCNK9	51305	8	140715557	-4.03847	6.47e-05	0.0145105	1.69233	0.0914036	0.722524
cg01382110		0	18	4454189	-4.03644	6.53e-05	0.0146083	NA	NA	NA
cg00276788	RYR1	6261	19	38993232	-4.03291	6.62e-05	0.0147976	-0.539711	0.589712	0.984046
cg11633280	MRGPRE	116534	11	3254452	-4.03043	6.69e-05	0.0149011	-0.636617	0.524758	0.971455
cg24928110		0	8	96085448	-4.02815	6.75e-05	0.0150172	NA	NA	NA
cg03981074	VWA5B2;MIR1224	90113	3	183959062	-4.02805	6.76e-05	0.0149999	2.7031	0.00717792	0.314794
cg20837681	MYH14	79784	19	50714072	-4.02515	6.84e-05	0.0151546	1.55813	0.120034	0.774001
cg06436905	GLRB	2743	4	157997167	-4.02493	6.84e-05	0.0151449	-1.18324	0.237452	0.876256
cg25482900	FBLL1	345630	5	167956911	-4.02468	6.85e-05	0.0151365	0.249458	0.803142	1.00692
cg25735398	DIRAS1	148252	19	2717293	-4.0238	6.87e-05	0.0151677	-1.91523	0.0562139	0.641541
cg11155090	XKR7	343702	20	30584531	-4.02184	6.93e-05	0.0152655	1.16553	0.244535	0.880555
cg10848373	KCNJ6	3763	21	39047855	-4.02007	6.98e-05	0.0153525	1.48723	0.137783	0.791621
cg17419660	TNNT3	7140	11	1950354	-4.01926	7e-05	0.0153794	-0.511664	0.609184	0.987895
cg00350931		0	4	1541867	-4.01885	7.01e-05	0.0153812	NA	NA	NA
cg11086642	LRP5	4041	11	68201305	-4.01784	7.04e-05	0.015421	-0.376302	0.706902	1.00083
cg23288755	GABRD	2563	1	1957320	-4.01672	7.07e-05	0.0154678	0.796343	0.42633	0.953592
cg24090696		0	6	169195968	-4.01445	7.14e-05	0.0155874	NA	NA	NA
cg03108139		0	7	155165471	-4.01319	7.18e-05	0.0156439	NA	NA	NA
cg21147648	LBXCOR1	390598	15	68118964	-4.01123	7.23e-05	0.0157449	-0.283647	0.776835	1.00707
cg15774065	FSCN2	25794	17	79495320	-4.0099	7.27e-05	0.0158061	1.10809	0.268525	0.899383
cg11686901	ELAVL3	1995	19	11565605	-4.00929	7.29e-05	0.0158214	-0.194014	0.846269	1.00533
cg00984540		0	7	155589293	-4.00631	7.38e-05	0.0159896	NA	NA	NA
cg26902127		0	16	88513285	-4.00521	7.41e-05	0.0160367	NA	NA	NA
cg10277651		0	20	623361	-4.00301	7.48e-05	0.016156	NA	NA	NA
cg09318169		0	2	132440047	-4.00117	7.54e-05	0.0162529	NA	NA	NA
cg12348202	PTPRN2	5799	7	158381023	-4	7.57e-05	0.0163053	0.404332	0.686196	0.99985
cg15677989	BAI2	576	1	32208487	-3.99944	7.59e-05	0.016318	-0.496289	0.619977	0.988166
cg13872541	KCNT1	57582	9	138661146	-3.99846	7.62e-05	0.0163338	0.807558	0.41985	0.949996
cg03400464	MAST1	22983	19	12969454	-3.99659	7.68e-05	0.016433	0.447622	0.654681	0.993497
cg04385765		0	7	5122887	-3.9959	7.7e-05	0.0164547	NA	NA	NA
cg08815672	CELSR1	9620	22	46929995	-3.99377	7.77e-05	0.0165721	-2.49172	0.0131383	0.386378
cg26955850	OXT	5020	20	3052345	-3.99024	7.88e-05	0.0167862	-0.758355	0.448708	0.962284
cg02947450		0	10	22766861	-3.98745	7.97e-05	0.0169511	NA	NA	NA
cg23509641	XKR7	343702	20	30583001	-3.9867	7.99e-05	0.0169772	1.16553	0.244535	0.880555
cg19852958	NKX3-2	579	4	13545760	-3.98546	8.03e-05	0.0170376	-2.44568	0.014911	0.408598
cg09528825	GSG1L	146395	16	28074388	-3.98432	8.07e-05	0.017091	5.53974	5.66742e-08	3.34811e-05
cg07518851	KNDC1	85442	10	135038446	-3.97849	8.26e-05	0.0174722	-1.06289	0.288505	0.910863
cg18671881		0	2	583286	-3.97808	8.28e-05	0.0174751	NA	NA	NA
cg22454744	KIAA0284	283638	14	105332600	-3.97632	8.33e-05	0.0175477	0.530466	0.596099	0.985614
cg12765382		0	17	26577877	-3.97387	8.42e-05	0.0176962	NA	NA	NA
cg13777759	HRNBP3	146713	17	77134081	-3.97381	8.42e-05	0.0176743	0.885313	0.376548	0.938146
cg22167515		0	1	91192466	-3.97344	8.43e-05	0.017675	NA	NA	NA
cg11351958	SERPINH1	871	11	75277791	-3.97182	8.49e-05	0.017765	-1.14983	0.250938	0.88567
cg22241820	LBXCOR1	390598	15	68122574	-3.97104	8.51e-05	0.0177945	-0.283647	0.776835	1.00707
cg08244866	NMNAT2	23057	1	183386237	-3.96979	8.56e-05	0.0178581	-0.818256	0.413724	0.95059
cg20966660	POFUT2	23275	21	46697213	-3.96803	8.62e-05	0.017959	0.215664	0.829365	1.00596
cg04824913	GAK	2580	4	887549	-3.96732	8.64e-05	0.0179839	-0.504748	0.614028	0.988647
cg24428218		0	10	126303795	-3.96642	8.67e-05	0.0180234	NA	NA	NA
cg04935449	CLEC2L	154790	7	139208871	-3.96566	8.7e-05	0.0180522	0.815581	0.415251	0.950402
cg18389807	XKR7	343702	20	30584459	-3.96404	8.76e-05	0.0181438	1.16553	0.244535	0.880555
cg19276111	CNR2	1269	1	24229232	-3.96389	8.76e-05	0.0181286	-1.16125	0.246268	0.880324
cg09075558	WNT3A	89780	1	228246780	-3.95991	8.9e-05	0.018395	0.43346	0.664926	0.99558
cg01089249	GAD1	2571	2	171676553	-3.95889	8.94e-05	0.0184439	-1.76387	0.0785571	0.68664
cg22964259	HIPK4	147746	19	40895711	-3.95863	8.95e-05	0.0184361	-1.34762	0.178583	0.827838
cg04089788	PLXNB2	23654	22	50738890	-3.95275	9.16e-05	0.0188505	0.148073	0.882364	1.00506
cg07547000	GALNT13	114805	2	154728210	-3.95212	9.19e-05	0.0188711	1.37224	0.170799	0.822111
cg01995743	SLC35F1	222553	6	118229732	-3.95121	9.22e-05	0.0189126	-1.9344	0.0538065	0.633132
cg14810139		0	18	8659650	-3.9503	9.26e-05	0.0189542	NA	NA	NA
cg04031507	DLGAP3	58512	1	35334359	-3.94664	9.39e-05	0.0192073	0.39037	0.696482	1.00161
cg02632227	GNPTG	84572	16	1404914	-3.94575	9.43e-05	0.0192485	-0.0245508	0.980426	0.995342
cg18721089		0	20	30220636	-3.94547	9.44e-05	0.0192427	NA	NA	NA
cg16625004	VWA5B2	90113	3	183959550	-3.94509	9.45e-05	0.0192441	2.7031	0.00717792	0.314794
cg10249507	UNC13A	23025	19	17758229	-3.94508	9.45e-05	0.0192174	0.405395	0.685416	0.999583
cg25746778	EBF3	253738	10	131758331	-3.9449	9.46e-05	0.0192044	-1.23561	0.217365	0.863017
cg10523645	KIF1A	547	2	241717262	-3.94399	9.49e-05	0.0192469	1.37632	0.169533	0.821332
cg03724463	CCK	885	3	42306524	-3.94283	9.54e-05	0.0193093	-0.14219	0.887005	1.00504
cg03023089		0	22	36806580	-3.94145	9.59e-05	0.0193617	NA	NA	NA
cg21091227		0	18	4454304	-3.9411	9.6e-05	0.0193612	NA	NA	NA
cg22179082	GPR12	2835	13	27334259	-3.93892	9.69e-05	0.0195032	1.36688	0.172472	0.823651
cg23671006	C1QTNF6	114904	22	37578450	-3.93758	9.74e-05	0.0195807	-2.20929	0.0277501	0.524848
cg03156893	PRKCB	5579	16	23847675	-3.93754	9.74e-05	0.0195566	-1.25225	0.211249	0.856511
cg20950301	DKK3	27122	11	12029738	-3.93525	9.83e-05	0.0197083	-2.46276	0.0142298	0.398634
cg20904111		0	7	1451136	-3.93385	9.89e-05	0.019764	NA	NA	NA
cg00745389		0	7	32467435	-3.93325	9.91e-05	0.0197837	NA	NA	NA
cg14542646		0	19	42700974	-3.93262	9.94e-05	0.0198055	NA	NA	NA
cg24151352	FOXF2	2295	6	1390838	-3.93169	9.97e-05	0.0198517	-3.43468	0.000658666	0.0816665
cg12210378	BRF1	2972	14	105685021	-3.93139	9.98e-05	0.0198476	-0.367705	0.713298	1.00205
cg24259244	ZIC5	85416	13	100624279	-3.93134	9.99e-05	0.0198242	-0.72808	0.467013	0.965064
cg00210133	TRABD	80305	22	50632714	-3.93099	0.000100003	0.019824	-0.291064	0.771161	1.00693
cg11211204	NEDD4L	23327	18	55923895	-3.93041	0.000100236	0.0198425	0.76577	0.444288	0.960083
cg01441945	CHERP	10523	19	16643557	-3.92659	0.000101781	0.0201204	0.387025	0.698954	1.00187
cg15644404	NFATC1	4772	18	77186268	-3.92573	0.00010213	0.0201614	-1.96021	0.0507016	0.620214
cg01397065	ADAT3;SCAMP4	113179	19	1908328	-3.92474	0.000102533	0.0202129	0.784074	0.433485	0.957548
cg15903666	PRDM16	63976	1	3342691	-3.92458	0.0001026	0.0201982	-0.648422	0.517103	0.970977
cg01852543	FIZ1	84922	19	56104970	-3.92275	0.000103354	0.0203185	-0.929272	0.353338	0.927489
cg02167190	DUSP14	11072	17	35872723	-3.92256	0.000103432	0.0203058	-0.0976433	0.922267	1.00128
cg09385815	CX3CL1	6376	16	57416169	-3.92228	0.000103546	0.0202722	-2.05214	0.0408408	0.588471
cg00332937		0	5	72740460	-3.91783	0.000105403	0.0206074	NA	NA	NA
cg26473844	GDNF	2668	5	37834909	-3.91723	0.000105658	0.020629	-1.36016	0.174587	0.82473
cg17179314	CHRNB4	1143	15	78933820	-3.91622	0.000106084	0.0206838	-0.0398327	0.968247	0.991346
cg00391479		0	19	1313527	-3.91601	0.000106171	0.0206724	NA	NA	NA
cg07954108	MMP21	118856	10	127464368	-3.91557	0.000106358	0.0206805	-0.804955	0.421349	0.950175
cg19443075	INS-IGF2;IGF2AS;IGF2	723961	11	2161403	-3.91539	0.000106434	0.0206671	-0.504677	0.614078	0.988569
cg19195419	ATP8B3	148229	19	1799935	-3.91369	0.00010716	0.0207797	-0.659949	0.509687	0.970753
cg11103390	ECHDC3	79746	10	11784920	-3.91347	0.00010725	0.0207689	2.17077	0.0305668	0.540938
cg23623852		0	6	168765844	-3.91109	0.000108274	0.0209387	NA	NA	NA
cg06398244	WNT4	54361	1	22446521	-3.91047	0.000108543	0.0209622	-1.92566	0.0548931	0.636962
cg20291321		0	X	36981602	-3.90981	0.000108826	0.0209884	NA	NA	NA
cg07879612	PTPRN2	5799	7	157891327	-3.90883	0.000109253	0.0210138	0.404332	0.686196	0.99985
cg11730254	ESPNP	284729	1	17023203	-3.90858	0.000109363	0.0210066	-1.23344	0.218172	0.86366
cg00381541		0	17	40192279	-3.90742	0.00010987	0.0210755	NA	NA	NA
cg22942200	AKAP12	9590	6	151560992	-3.90624	0.000110386	0.021146	-1.15307	0.249608	0.883924
cg12625263	TUBB4;MIR220B	10382	19	6495952	-3.90325	0.000111706	0.0213701	0.242642	0.808413	1.00668
cg20610605		0	16	30845651	-3.90278	0.000111917	0.0213817	NA	NA	NA
cg26407571	FLJ12825;LOC100240735	440101	12	54473534	-3.90086	0.000112776	0.0215169	0.389265	0.697298	1.002
cg20717123	P2RX2	22953	12	133195520	-3.89773	0.000114187	0.021757	0.405571	0.685286	0.999757
cg21319932		0	6	1379694	-3.89658	0.000114708	0.021827	NA	NA	NA
cg18190187	DRD1	1812	5	174871289	-3.89634	0.00011482	0.0218192	-0.54265	0.587689	0.984185
cg22231400	SLC17A7	57030	19	49935823	-3.89614	0.000114909	0.021807	-0.914281	0.361149	0.932276
cg27555894		0	19	5799374	-3.89511	0.00011538	0.0218672	NA	NA	NA
cg08618620	ACVRL1	94	12	52309094	-3.89451	0.000115656	0.0218904	-1.18786	0.23563	0.877757
cg25434223	ELAVL3	1995	19	11591491	-3.89271	0.000116487	0.0220184	-0.194014	0.846269	1.00533
cg25780671	OTP	23440	5	76932955	-3.89229	0.000116678	0.0220252	0.229835	0.818344	1.00571
cg24639679	PPP1R2P1	100507444	6	32847590	-3.89184	0.000116888	0.0220356	NA	NA	NA
cg04121561		0	21	44007550	-3.88928	0.000118081	0.0222311	NA	NA	NA
cg01240056		0	7	1263927	-3.88888	0.000118266	0.0222365	NA	NA	NA
cg05690644	GDF6	392255	8	97158015	-3.88667	0.000119312	0.0224036	-1.08595	0.278189	0.904014
cg07525420	EBF3	253738	10	131761181	-3.88561	0.000119814	0.0224682	-1.23561	0.217365	0.863017
cg22124648	FGR	2268	1	27941866	-3.885	0.0001201	0.0224922	-1.88383	0.0603512	0.652781
cg21252280	SLC4A11	83959	20	3209343	-3.88419	0.000120487	0.022535	-1.57966	0.115016	0.765477
cg08249988	NCAN	1463	19	19322818	-3.88225	0.000121418	0.0226794	-0.731004	0.465227	0.964848
cg08315202	NPTX2	4885	7	98246006	-3.88098	0.000122029	0.0227636	1.27382	0.203506	0.851231
cg21591742	HOXD10	3236	2	176980998	-3.87701	0.000123961	0.0230937	-1.54865	0.122297	0.775398
cg04112126	KNDC1	85442	10	134980924	-3.87635	0.000124285	0.0231238	-1.06289	0.288505	0.910863
cg13081704	KCNQ1DN	55539	11	2890457	-3.87356	0.000125662	0.0233495	-0.297274	0.76642	1.00788
cg15326656	B3GNTL1	146712	17	80918416	-3.87176	0.000126561	0.0234859	0.456482	0.648304	0.992669
cg16049690	BTNL9	153579	5	180486679	-3.87072	0.000127085	0.0235524	0.47385	0.635879	0.989715
cg10267867	SEC14L5	9717	16	5038226	-3.87071	0.00012709	0.0235227	-0.550121	0.58256	0.983881
cg12175729	KCNK9	51305	8	140715540	-3.87039	0.000127249	0.0235216	1.69233	0.0914036	0.722524
cg14620572	GPR144	347088	9	127215669	-3.86948	0.000127705	0.0235752	-0.39648	0.691973	1.00115
cg05417162		0	15	89959854	-3.86862	0.000128143	0.0236255	NA	NA	NA
cg11068049		0	4	1541596	-3.86775	0.000128583	0.0236759	NA	NA	NA
cg11142705	CCK	885	3	42306974	-3.8668	0.000129065	0.023734	-0.14219	0.887005	1.00504
cg25826463	NFIC	4782	19	3369820	-3.86532	0.000129821	0.0238422	-3.43585	0.000655936	0.0818331
cg09642525		0	16	85320701	-3.86396	0.000130521	0.023909	NA	NA	NA
cg14590843	GDNF	2668	5	37838290	-3.86346	0.000130779	0.0239255	-1.36016	0.174587	0.82473
cg18317933	PRKDC	5591	8	48744017	-3.86277	0.000131134	0.0239596	0.268654	0.788341	1.00793
cg00161450	LOC388955	388955	2	63849938	-3.8616	0.000131741	0.0240397	-0.214889	0.829969	1.00614
cg07176264	SCTR	6344	2	120281999	-3.86126	0.000131916	0.0240408	-0.20953	0.834147	1.00617
cg26503073		0	7	6704074	-3.86014	0.000132502	0.0240859	NA	NA	NA
cg09070846		0	13	69559039	-3.85934	0.000132921	0.0241313	NA	NA	NA
cg05708114	ARID3C	138715	9	34624587	-3.85834	0.000133444	0.0241954	-0.44222	0.658582	0.994084
cg03679521	NEUROD2	4761	17	37764153	-3.85672	0.000134301	0.0243198	4.06663	5.80113e-05	0.0138716
cg11278311	ALOX15	246	17	4544507	-3.85595	0.000134708	0.0243625	-1.22167	0.222591	0.866129
cg16080876	NEFL	4747	8	24813866	-3.85384	0.000135833	0.0245347	0.73124	0.465084	0.965148
cg18746336		0	3	128216122	-3.85216	0.000136729	0.0246653	NA	NA	NA
cg17848054	RGL3	57139	19	11517260	-3.85113	0.000137286	0.0247344	-1.06284	0.288531	0.910802
cg18581963	SOX3	6658	X	139587695	-3.85015	0.000137816	0.0247985	2.24978	0.0250344	0.508434
cg25482786	CHL1	10752	3	238496	-3.85014	0.000137823	0.0247685	-1.62101	0.105845	0.747015
cg25384089	GABRD	2563	1	1961628	-3.84953	0.000138156	0.024797	0.796343	0.42633	0.953592
cg20395892	IRAK3	11213	12	66582780	-3.84646	0.000139832	0.0250662	0.765405	0.444506	0.960346
cg23413506	SLC4A11	83959	20	3218579	-3.84636	0.000139887	0.0250445	-1.57966	0.115016	0.765477
cg01163330	TRAK1	22906	3	42244105	-3.84436	0.000140989	0.0251785	-1.36263	0.173806	0.824726
cg09426834	SNTG2	54221	2	946648	-3.84211	0.00014224	0.0253701	-0.584052	0.559532	0.976435
cg16251902		0	17	80303650	-3.84141	0.000142633	0.0253766	NA	NA	NA
cg20649017	HOXD10	3236	2	176980837	-3.83997	0.000143441	0.0254884	-1.54865	0.122297	0.775398
cg10922935		0	17	78452048	-3.83741	0.000144891	0.025714	NA	NA	NA
cg05390496	LLGL2	3993	17	73569370	-3.83711	0.000145058	0.0257116	2.26109	0.0243186	0.506705
cg24389599	COL6A2	1292	21	47531945	-3.83634	0.000145499	0.0257577	-1.72344	0.0856217	0.70861
cg23904955		0	10	101282759	-3.83536	0.00014606	0.0258249	NA	NA	NA
cg26142412		0	11	20185077	-3.83523	0.000146131	0.0258054	NA	NA	NA
cg03890538	RPTOR	57521	17	78938344	-3.8343	0.000146665	0.0258676	0.613079	0.540191	0.974604
cg14187335	GJD4	219770	10	35896950	-3.8341	0.000146783	0.0258563	2.34116	0.0197399	0.466465
cg22821324	GPM6A	2823	4	176923439	-3.83228	0.000147832	0.0260089	-0.994648	0.32054	0.919899
cg14400886	PCDH10	57575	4	134070441	-3.83099	0.000148582	0.0261086	0.490486	0.624073	0.989121
cg11423130		0	13	112630656	-3.83025	0.000149012	0.0261519	NA	NA	NA
cg00882883		0	12	133052863	-3.82994	0.000149192	0.0261512	NA	NA	NA
cg20292653		0	2	5847374	-3.82767	0.000150527	0.0263528	NA	NA	NA
cg12104333	WTIP	126374	19	34988832	-3.82738	0.000150696	0.02635	-1.34397	0.179761	0.828707
cg03933756	MTHFSD	64779	16	86565719	-3.8268	0.000151037	0.0263772	0.803879	0.421969	0.950828
cg00510502	DLGAP2	9228	8	1501670	-3.82623	0.000151376	0.026404	-0.410722	0.681508	0.999691
cg22730047		0	1	161410551	-3.82537	0.000151886	0.0264605	NA	NA	NA
cg16824477		0	17	40192449	-3.82486	0.000152191	0.0264812	NA	NA	NA
cg04289624	CSPG5	10675	3	47620963	-3.82237	0.000153678	0.0267073	-0.485271	0.627764	0.988884
cg20318845	SIX2	10736	2	45237781	-3.82114	0.00015442	0.0267709	-0.544813	0.586202	0.983581
cg03307893	ATP10A	57194	15	26108683	-3.82063	0.000154729	0.0267918	-2.20392	0.0281291	0.525093
cg23106251	SLITRK2	84631	X	144900190	-3.81747	0.000156652	0.027059	-0.518519	0.604398	0.986666
cg15758783	PNLDC1	154197	6	160221183	-3.81645	0.000157273	0.0271333	3.565	0.000410246	0.0601475
cg25293806	TMEM190	147744	19	55889387	-3.81595	0.000157584	0.0271541	-0.963016	0.336152	0.92139
cg13608545		0	22	43166139	-3.81341	0.000159154	0.0273914	NA	NA	NA
cg13344169	SSTR2	6752	17	71161178	-3.81332	0.000159207	0.0273675	1.23616	0.217161	0.862547
cg16061498		0	18	55095886	-3.81258	0.000159671	0.0274141	NA	NA	NA
cg15710198	SOX17	64321	8	55370334	-3.8101	0.000161224	0.0276474	-0.726668	0.467877	0.964963
cg17655970		0	13	112985463	-3.80938	0.000161672	0.0276909	NA	NA	NA
cg24362661	SAMD11	148398	1	871546	-3.80785	0.000162643	0.0278237	-3.15121	0.00175486	0.145054
cg09386420		0	16	85204599	-3.80768	0.000162747	0.0278081	NA	NA	NA
cg13230186		0	13	114743606	-3.80674	0.000163344	0.0278766	NA	NA	NA
cg14976500	CACNA1H	8912	16	1210484	-3.80606	0.00016378	0.0279175	-1.16374	0.24526	0.880325
cg15366684	ADAMTS2	9509	5	178684652	-3.80447	0.0001648	0.0280578	-1.54113	0.124117	0.774948
cg09315367	SLC44A2	57153	19	10736006	-3.80437	0.000164863	0.028035	-0.934068	0.350862	0.926317
cg03969305		0	6	161188183	-3.80309	0.000165688	0.0281417	NA	NA	NA
cg10409302		0	4	185942292	-3.80272	0.000165925	0.0281483	NA	NA	NA
cg18582342	ELAVL3	1995	19	11591989	-3.80089	0.000167109	0.0283154	-0.194014	0.846269	1.00533
cg02509825	XKR4	114786	8	56015399	-3.80061	0.00016729	0.0283124	-0.692116	0.489287	0.966924
cg02434035	UNCX	340260	7	1273835	-3.80004	0.000167662	0.0283416	-0.0874019	0.930398	0.99941
cg00258597		0	8	23567607	-3.79865	0.000168575	0.0284622	NA	NA	NA
cg00298405	CELSR1	9620	22	46835192	-3.79808	0.000168949	0.0284578	-2.49172	0.0131383	0.386378
cg18735136	ANKRD24	170961	19	4217682	-3.79773	0.00016918	0.028463	1.38418	0.167116	0.819105
cg14585415	PDZD7	79955	10	102778683	-3.7967	0.000169857	0.0285432	0.0500525	0.960107	0.990178
cg06768599	LTB4R	1241	14	24785488	-3.79661	0.000169916	0.0285194	1.42726	0.154325	0.806391
cg02963878	CHRNA4	1137	20	61978070	-3.79628	0.000170135	0.0285226	-0.306799	0.759165	1.00611
cg00217953	SEMA4C	54910	2	97527635	-3.79615	0.000170222	0.0285036	-2.74726	0.00629568	0.293399
cg01917657	PANX2	56666	22	50617092	-3.7955	0.000170651	0.0285418	-0.934506	0.350636	0.926695
cg02568761		0	12	34496768	-3.79509	0.000170924	0.0285539	NA	NA	NA
cg08344181		0	3	125677491	-3.79318	0.000172198	0.028733	NA	NA	NA
cg01210550		0	4	3773891	-3.79283	0.000172433	0.0287386	NA	NA	NA
cg13551510	NTM	50863	11	131560938	-3.79158	0.000173273	0.0288448	-2.60355	0.009588	0.342069
cg23951474	TH	7054	11	2188061	-3.78999	0.000174344	0.0289892	0.0118579	0.990545	0.996998
cg06444755	NXPH1	30010	7	8473990	-3.78982	0.000174456	0.0289739	0.318042	0.750628	1.00467
cg25916711	NKX2-5	1482	5	172660080	-3.78828	0.000175507	0.0291145	-0.287487	0.773896	1.00683
cg00828798		0	16	873426	-3.78754	0.000176012	0.0291643	NA	NA	NA
cg02386403	FOXF2	2295	6	1390998	-3.78733	0.000176154	0.0291539	-3.43468	0.000658666	0.0816665
cg18562578	WNT5A	7474	3	55517853	-3.78722	0.000176225	0.0291318	-3.06653	0.00232059	0.169496
cg14973204		0	12	133052753	-3.78621	0.000176922	0.0292131	NA	NA	NA
cg03122264	C6orf174	387104	6	127797208	-3.78583	0.000177181	0.0292219	-1.35599	0.175908	0.826499
cg27316886	PRMT8	56341	12	3600106	-3.78475	0.000177922	0.0293102	-0.470076	0.63857	0.989532
cg15222899		0	18	55095249	-3.78423	0.000178285	0.029336	NA	NA	NA
cg07629996	NHS	4810	X	17673876	-3.78353	0.000178766	0.0293812	-2.31045	0.0213984	0.477566
cg24536689	NHS	4810	X	17673760	-3.78336	0.000178888	0.0293673	-2.31045	0.0213984	0.477566
cg03860256	MOV10L1	54456	22	50528291	-3.7831	0.000179067	0.0293629	-1.51546	0.130489	0.781919
cg08663152	EHD2	30846	19	48244519	-3.78214	0.000179737	0.0294388	-1.67849	0.0940742	0.73126
cg08131003		0	8	54507118	-3.78151	0.000180171	0.029476	NA	NA	NA
cg16590151	SYNCRIP	10492	6	86352636	-3.7799	0.000181304	0.0296273	0.852546	0.394448	0.945338
cg07698638	ACCN3	9311	7	150746232	-3.77438	0.000185216	0.0302318	0.380953	0.703451	1.00089
cg00628185	BIRC7	79444	20	61870861	-3.77416	0.000185375	0.0302231	-0.457766	0.647382	0.992544
cg27661209	MUC5B	727897	11	1252192	-3.77392	0.000185548	0.0302167	-1.41518	0.157834	0.811219
cg18158604	LARGE	9215	22	34046477	-3.77296	0.00018624	0.0302948	-0.817559	0.414121	0.950524
cg13373897	SLC4A11	83959	20	3210075	-3.76993	0.000188435	0.0306168	-1.57966	0.115016	0.765477
cg04386206	SLC7A14	57709	3	170303640	-3.76846	0.000189505	0.0307556	-0.813361	0.41652	0.951248
cg01447112		0	7	6703803	-3.76768	0.000190077	0.0308133	NA	NA	NA
cg06462796	FOXB2	442425	9	79634861	-3.76712	0.00019049	0.0308451	-0.0694068	0.944702	0.99566
cg09998451	RAB3A	5864	19	18313429	-3.76553	0.000191661	0.0309994	-2.77964	0.00571244	0.279173
cg03384094	SH2D4A	63898	8	19172048	-3.76359	0.000193106	0.0311977	-1.20717	0.228116	0.87109
cg10008710	C19orf21	126353	19	758400	-3.76107	0.000194993	0.0314668	1.5078	0.132437	0.784931
cg13895323	MOV10L1	54456	22	50528641	-3.75996	0.000195832	0.0315664	-1.51546	0.130489	0.781919
cg18836174		0	18	11724	-3.75857	0.000196879	0.0316993	NA	NA	NA
cg23786625	SORCS3	22986	10	106402741	-3.75839	0.000197019	0.031686	0.377448	0.706052	1.00076
cg18383668	GEMIN7	79760	19	45594410	-3.75636	0.000198567	0.0318989	-0.622927	0.533706	0.972426
cg10785263		0	1	63785867	-3.75482	0.000199747	0.0320523	NA	NA	NA
cg05798436		0	4	100573150	-3.75457	0.000199943	0.0320476	NA	NA	NA
cg06757138	FHOD3	80206	18	34340585	-3.7545	0.000199998	0.0320204	-1.44822	0.148381	0.800745
cg09865095	HLA-G	3135	6	29795557	-3.75405	0.000200338	0.0320388	-0.24158	0.809236	1.00627
cg15204874	SSBP3	23648	1	54822298	-3.75181	0.000202079	0.0322809	0.161432	0.871839	1.00596
cg11333375	MORN1	79906	1	2316488	-3.75177	0.000202106	0.032249	1.00065	0.317634	0.9217
cg14522629		0	9	134699146	-3.74872	0.000204498	0.0325942	NA	NA	NA
cg02062404	MRPL55	128308	1	228295382	-3.74815	0.000204946	0.0326291	-0.695695	0.487045	0.966296
cg00173063		0	8	144442437	-3.74696	0.000205888	0.0327424	NA	NA	NA
cg16691593	OTP	23440	5	76934634	-3.7465	0.000206245	0.0327626	0.229835	0.818344	1.00571
cg13481374	KIF24	347240	9	34318769	-3.74649	0.000206256	0.0327278	1.9044	0.0576131	0.647213
cg12881363	MOV10L1	54456	22	50528298	-3.74632	0.00020639	0.0327126	-1.51546	0.130489	0.781919
cg06982473	MARK2	2011	11	63676611	-3.74566	0.00020692	0.0327601	0.191729	0.848057	1.00526
cg04365609		0	2	239930900	-3.74562	0.000206947	0.032728	NA	NA	NA
cg04067157	CA5A	763	16	87948527	-3.74497	0.000207468	0.0327376	-0.332473	0.739716	1.00344
cg25276126	HTR6	3362	1	20005715	-3.74224	0.000209652	0.0330456	0.0327876	0.973861	0.993044
cg13660622	SRPK2	6733	7	104885375	-3.74218	0.000209701	0.0330168	0.470533	0.638244	0.989944
cg04982308	BTBD17	388419	17	72353473	-3.73993	0.000211524	0.0332303	2.07494	0.0386649	0.585247
cg19789753		0	2	242805962	-3.73948	0.000211888	0.0332508	NA	NA	NA
cg04443870	ITGB2	3689	21	46321415	-3.73894	0.00021233	0.0332834	-1.80047	0.0725798	0.673677
cg03274831		0	17	79674561	-3.73879	0.000212453	0.0332661	NA	NA	NA
cg05157140	UNCX	340260	7	1272545	-3.73877	0.000212469	0.033232	-0.0874019	0.930398	0.99941
cg16697214	IKZF1	10320	7	50343361	-3.73754	0.000213473	0.0333524	-2.22703	0.0265308	0.5199
cg08918582	MCF2L	23263	13	113687422	-3.73751	0.000213495	0.0333193	0.834535	0.404504	0.949611
cg01350077	MDFI	4188	6	41606317	-3.73716	0.000213786	0.0333281	-2.05579	0.0404857	0.587995
cg24343310		0	11	57249947	-3.73702	0.000213899	0.0333093	NA	NA	NA
cg11892997	PITPNM2	57605	12	123482053	-3.73678	0.000214093	0.033303	-0.663915	0.507147	0.970333
cg20174066	ATP10A	57194	15	26108263	-3.73607	0.000214684	0.0333585	-2.20392	0.0281291	0.525093
cg16252727	DMRTB1	63948	1	53925658	-3.73606	0.000214688	0.0333228	-0.103187	0.917869	1.00225
cg02368177	TUBA3E	112714	2	130956271	-3.73521	0.000215392	0.0333956	1.45514	0.146456	0.799163
cg03468072		0	12	39539422	-3.73502	0.00021555	0.0333837	NA	NA	NA
cg26333837	NEUROG3	50674	10	71332744	-3.73444	0.000216024	0.0334208	2.78815	0.00556746	0.275438
cg04115680	SRRM3	222183	7	75889229	-3.73411	0.000216299	0.033427	-1.41125	0.15899	0.810114
cg25604883	AK5	26289	1	77747387	-3.73327	0.000216995	0.0334982	-1.29882	0.194794	0.845791
cg00610310	LOC146336;SSTR5	0	16	1128740	-3.73274	0.000217442	0.0335308	NA	NA	NA
cg19619414	FAM20C	56975	7	218950	-3.73272	0.000217455	0.0334965	-1.93231	0.0540639	0.634303
cg17917837	SEMA7A	8482	15	74703054	-3.73175	0.000218265	0.033585	-2.1171	0.0349007	0.564425
cg02015607		0	16	1056992	-3.7299	0.000219818	0.0337874	NA	NA	NA
cg01812045	DES	1674	2	220283739	-3.72876	0.000220782	0.033899	-2.09864	0.0365079	0.572442
cg01153834	MRGPRE	116534	11	3254296	-3.72865	0.000220876	0.0338769	-0.636617	0.524758	0.971455
cg19402371	TMEM190	147744	19	55889013	-3.72813	0.000221315	0.0339076	-0.963016	0.336152	0.92139
cg18054172	HOXC4;HOXC5	3221	12	54424902	-3.72592	0.000223196	0.0341224	-0.120103	0.904465	1.00321
cg16456503	PSKH1	5681	16	67943052	-3.72584	0.000223267	0.0340966	2.61347	0.00931884	0.341566
cg18587059	HAPLN3	145864	15	89424647	-3.72321	0.000225525	0.0344045	-3.04076	0.00252345	0.17478
cg24239329	DCLK1	9201	13	36705622	-3.72203	0.000226547	0.0345234	-0.657794	0.511069	0.970901
cg13735819	JSRP1	126306	19	2253850	-3.72193	0.000226633	0.0344996	-0.877449	0.380797	0.939297
cg09610569	SLITRK2	84631	X	144899592	-3.72153	0.000226978	0.0345152	-0.518519	0.604398	0.986666
cg19899008	SLC12A4	6560	16	68003657	-3.72145	0.000227049	0.0344892	-1.99909	0.0463107	0.601291
cg05441941		0	16	873598	-3.71984	0.000228449	0.0346648	NA	NA	NA
cg22510911	MAST1	22983	19	12969424	-3.71963	0.000228633	0.0346558	0.447622	0.654681	0.993497
cg19206040	GRIK3	2899	1	37500441	-3.71884	0.000229324	0.0347236	-1.0773	0.282031	0.906526
cg04319659		0	6	161188337	-3.71811	0.000229967	0.0347839	NA	NA	NA
cg05276469		0	17	16570473	-3.71664	0.000231262	0.0349427	NA	NA	NA
cg06252564		0	9	970605	-3.7161	0.000231737	0.0349773	NA	NA	NA
cg22599236	LRRC3	81543	21	45877325	-3.71563	0.000232153	0.0349659	-0.749572	0.453976	0.963602
cg19084589	LIN28	79727	1	26737711	-3.71367	0.000233903	0.0351923	-0.288924	0.772797	1.00658
cg08510234	NXN	64359	17	738869	-3.71312	0.000234394	0.0352289	-1.21632	0.224617	0.866959
cg01984854		0	16	85879072	-3.71307	0.000234439	0.0351985	NA	NA	NA
cg07748854		0	19	36449875	-3.71295	0.000234543	0.035177	NA	NA	NA
cg21970789		0	5	134826388	-3.71235	0.00023508	0.0352204	NA	NA	NA
cg25052664	ANK1	286	8	41733652	-3.71233	0.000235094	0.0351855	-2.13769	0.0331796	0.557229
cg04150055		0	9	133536855	-3.7121	0.000235305	0.0351801	NA	NA	NA
cg25354127	PAQR9	344838	3	142681595	-3.71105	0.000236253	0.0352847	-0.291644	0.770718	1.00707
cg17658717	CLEC3B	7123	3	45077254	-3.71079	0.00023648	0.0352816	-1.263	0.207363	0.853154
cg16690577	ODZ3	10178	4	183721716	-3.70571	0.000241107	0.0359343	-1.15793	0.24762	0.882018
cg23913995		0	20	21490665	-3.7052	0.000241579	0.035967	NA	NA	NA
cg12432010	IQSEC3	440073	12	176081	-3.70408	0.000242616	0.0360836	-1.45856	0.145513	0.79879
cg18803104		0	6	28956324	-3.70394	0.000242737	0.0360639	NA	NA	NA
cg16468843	ATP2B2	491	3	10370624	-3.7022	0.000244356	0.0362666	-1.0746	0.283235	0.906913
cg00201234	FBLN2	2199	3	13590968	-3.70219	0.000244368	0.0362306	-1.64524	0.100747	0.739082
cg25508679		0	6	28956403	-3.70194	0.0002446	0.0362273	NA	NA	NA
cg17733824	SLC12A7	10723	5	1099592	-3.70161	0.000244907	0.036235	0.535426	0.592669	0.984481
cg21120413	COL23A1	91522	5	177946120	-3.69886	0.000247479	0.0365396	-2.49763	0.0129247	0.384032
cg19243826	PTGER1	5731	19	14584926	-3.69881	0.000247533	0.0365097	-0.74855	0.454592	0.963076
cg04328762	2018-09-05	0	22	19706186	-3.6986	0.000247724	0.0365001	NA	NA	NA
cg20887073		0	6	10381764	-3.69831	0.000248	0.0365029	NA	NA	NA
cg05341815		0	17	47979730	-3.69826	0.000248049	0.0364724	NA	NA	NA
cg14087921	KCNT1	57582	9	138660958	-3.69803	0.00024827	0.0364672	0.807558	0.41985	0.949996
cg01408654	PCDH10	57575	4	134070437	-3.69621	0.000249988	0.0366817	0.490486	0.624073	0.989121
cg00318897		0	16	88268362	-3.69572	0.000250458	0.0367129	NA	NA	NA
cg10092257		0	18	19476959	-3.69541	0.000250753	0.0367183	NA	NA	NA
cg04849541		0	5	1931620	-3.69504	0.000251107	0.0367323	NA	NA	NA
cg12792180	HRNBP3	146713	17	77133977	-3.69455	0.000251578	0.0367635	0.885313	0.376548	0.938146
cg02324006	HMHA1	23526	19	1080034	-3.694	0.000252102	0.0368022	-0.243264	0.807932	1.00671
cg18810664		0	10	31074367	-3.69384	0.000252251	0.0367863	NA	NA	NA
cg00118783		0	16	1069760	-3.69123	0.000254771	0.0371157	NA	NA	NA
cg23286105	MYOM2	9172	8	2078387	-3.68876	0.000257172	0.037389	-2.55532	0.0109978	0.360362
cg25738176	ATP2A3	489	17	3848506	-3.68772	0.000258191	0.0374988	-2.0721	0.0389301	0.585731
cg10096052	NHLRC4	283948	16	615709	-3.68684	0.000259052	0.0375855	-0.262821	0.792831	1.00739
cg19110755	LOC145814	0	15	99512842	-3.68672	0.000259168	0.0375641	NA	NA	NA
cg10930513	CD163L1	283316	12	7592509	-3.68554	0.000260336	0.037695	-2.65896	0.00816964	0.327536
cg02128053	SCARA5	286133	8	27779656	-3.68541	0.000260464	0.0376752	-0.749884	0.453789	0.964121
cg11902728	MAG	4099	19	35786580	-3.68537	0.000260501	0.0376423	0.938556	0.348555	0.924479
cg01082091	FZD9	8326	7	72849243	-3.6852	0.00026067	0.0376285	-1.29148	0.197324	0.846709
cg08330132		0	16	29232139	-3.68349	0.000262367	0.0378351	NA	NA	NA
cg26720235		0	16	85879079	-3.68185	0.000263998	0.0380317	NA	NA	NA
cg05086444	VIPR2	7434	7	158854447	-3.68154	0.000264312	0.0380385	-1.79948	0.0727363	0.673264
cg04860238		0	14	102394986	-3.68149	0.000264357	0.0380065	NA	NA	NA
cg00714184	LRAT	9227	4	155664242	-3.68046	0.0002654	0.038118	0.287635	0.773783	1.00695
cg02117924	ITGB2	3689	21	46321585	-3.68025	0.000265607	0.0381092	-1.80047	0.0725798	0.673677
cg15822765		0	6	28956387	-3.67933	0.00026653	0.0382032	NA	NA	NA
cg10314566	ASB1	51665	2	239344626	-3.67872	0.000267149	0.0382534	0.70268	0.482686	0.966815
cg06929414	POFUT2;LOC642852	23275	21	46708729	-3.67822	0.000267653	0.038287	0.215664	0.829365	1.00596
cg04047221	SOX1	6656	13	112723477	-3.67743	0.000268463	0.0383643	-0.0178869	0.985738	0.996554
cg01454592	CCDC36	339834	3	49236800	-3.67742	0.000268467	0.0383264	-1.16463	0.2449	0.879976
cg14552379		0	14	60982036	-3.67692	0.000268977	0.0383608	NA	NA	NA
cg13388191	PRDM16	63976	1	3059137	-3.67686	0.000269041	0.0383315	-0.648422	0.517103	0.970977
cg10524033	PCDH10	57575	4	134070433	-3.67605	0.000269866	0.0384106	0.490486	0.624073	0.989121
cg22410435		0	22	38221618	-3.67499	0.000270956	0.0385272	NA	NA	NA
cg18938204	EMILIN3	90187	20	39994857	-3.67433	0.000271626	0.0385839	0.438014	0.661625	0.994939
cg17793621	ATP10A	57194	15	26108084	-3.67328	0.000272716	0.0386616	-2.20392	0.0281291	0.525093
cg07954572	TESC	54997	12	117484521	-3.67259	0.000273426	0.0387237	-1.3562	0.17584	0.826373
cg07748753	C16orf81	283860	16	89225822	-3.67253	0.000273485	0.0386935	-0.61934	0.536064	0.973278
cg11825621	MKX	283078	10	28034792	-3.67105	0.000275027	0.038873	-0.947555	0.343958	0.923012
cg04752263	HRH3	11255	20	60791717	-3.67056	0.000275535	0.0389062	0.664383	0.506848	0.970315
cg09935994	ARL4C	10123	2	235406540	-3.67009	0.000276017	0.0389356	-2.30287	0.0218256	0.482808
cg00041047	SLC6A16	28968	19	49828629	-3.67009	0.000276023	0.0388979	-1.12717	0.26038	0.892035
cg18919720	FSCN2	25794	17	79495335	-3.66897	0.000277194	0.0390243	1.10809	0.268525	0.899383
cg03733760	FGF19	9965	11	69517841	-3.66837	0.000277821	0.0390354	-0.242005	0.808907	1.00655
cg26130488		0	17	59530104	-3.66758	0.000278656	0.0391141	NA	NA	NA
cg18629132		0	10	131592435	-3.66717	0.000279087	0.0390975	NA	NA	NA
cg07703401	HBQ1	3049	16	230341	-3.66575	0.000280588	0.0392691	0.869191	0.385291	0.94125
cg18369516	ZBTB46	140685	20	62406721	-3.66471	0.000281695	0.0393853	-0.794403	0.427457	0.954307
cg19267252		0	2	105459317	-3.66442	0.000281994	0.0393884	NA	NA	NA
cg24029994	BRSK2	9024	11	1471410	-3.66438	0.000282043	0.0393566	-0.0608807	0.951486	0.995964
cg06727233		0	13	114926689	-3.66377	0.000282693	0.0394087	NA	NA	NA
cg20266316	NPTX2	4885	7	98247587	-3.66316	0.000283346	0.0394611	1.27382	0.203506	0.851231
cg10372921	LOXL1	4016	15	74218733	-3.66312	0.000283386	0.0394281	-2.20104	0.028334	0.524049
cg16191088	ADAMTS10	81794	19	8654389	-3.66301	0.000283504	0.0394059	-0.25902	0.79576	1.00767
cg04453050	GRM2	2912	3	51740896	-3.66242	0.000284141	0.039456	0.597796	0.550332	0.974519
cg00512279	SLC18A2	6571	10	119000991	-3.6588	0.000288041	0.0399585	-0.648896	0.516798	0.971038
cg10390058	GALR1	2587	18	74962794	-3.65789	0.00028903	0.0400567	-0.556342	0.578305	0.981896
cg02421985		0	5	180527547	-3.65751	0.000289452	0.0400761	NA	NA	NA
cg04476626		0	5	1726145	-3.65656	0.000290487	0.0401804	NA	NA	NA
cg00346320		0	16	88134589	-3.65584	0.000291281	0.040212	NA	NA	NA
cg22051754		0	9	139069756	-3.6545	0.00029275	0.0403757	NA	NA	NA
cg11856002	CALHM1	255022	10	105215188	-3.6542	0.000293088	0.0403832	0.0841066	0.933016	0.998591
cg19212674	RUFY3	22902	4	71571625	-3.65374	0.000293596	0.040414	-0.29153	0.770805	1.00712
cg00232387	DIRAS1	148252	19	2717526	-3.65301	0.000294395	0.0404849	-1.91523	0.0562139	0.641541
cg09955645	DIP2C	22982	10	531098	-3.65229	0.000295195	0.0405557	0.289858	0.772083	1.00662
cg14590011		0	6	34113887	-3.65192	0.000295607	0.040534	NA	NA	NA
cg22036140	EFNB1	1947	X	68060446	-3.65077	0.000296898	0.0406719	0.834549	0.404496	0.949703
cg20025656	ACTA1	58	1	229570230	-3.64998	0.00029778	0.0407535	-1.49587	0.135518	0.790134
cg01794501	PCP4L1	654790	1	161229027	-3.64907	0.000298805	0.0408545	1.06996	0.285316	0.908075
cg17874109		0	16	85879145	-3.64872	0.000299191	0.040868	NA	NA	NA
cg08463820	PTPRN2	5799	7	157453872	-3.6484	0.000299551	0.0408779	0.404332	0.686196	0.99985
cg25254825	TMEM132C	92293	12	128850696	-3.64837	0.00029959	0.0408441	0.025099	0.979989	0.99515
cg05941129	PCDHA2;PCDHA1;PCDHA4;PCDHA3	56146	5	140188813	-3.6477	0.000300347	0.0409081	-0.294914	0.76822	1.00682
cg01619929		0	22	36806443	-3.64651	0.000301689	0.0410516	NA	NA	NA
cg04086197	PPP1R13B	23368	14	104205071	-3.64546	0.000302883	0.0411747	-0.586634	0.557798	0.976802
cg06553871	SPTBN4	57731	19	40996006	-3.64511	0.000303283	0.0411898	0.886647	0.37583	0.938336
cg22517801	PTPRN2	5799	7	157453790	-3.6451	0.000303299	0.0411527	0.404332	0.686196	0.99985
cg24504854	FAM20C	56975	7	195679	-3.6429	0.000305817	0.0414154	-1.93231	0.0540639	0.634303
cg26011692	LTBP2	4053	14	75052601	-3.64171	0.000307185	0.0415611	-1.47805	0.140222	0.793829
cg02614024		0	15	93652766	-3.64084	0.000308186	0.0416569	NA	NA	NA
cg12294260	SEC16A	9919	9	139360684	-3.63947	0.000309782	0.0418329	0.887861	0.375177	0.937873
cg00860808		0	2	171670500	-3.63943	0.000309821	0.0417985	NA	NA	NA
cg19919881	PWWP2B	170394	10	134209611	-3.63879	0.000310569	0.0418598	0.0503645	0.959858	0.990278
cg19605644	LMF1	64788	16	945558	-3.63816	0.000311308	0.0419197	-0.669044	0.503873	0.969704
cg18689454	AIRE	326	21	45705694	-3.63749	0.000312091	0.0419854	1.21711	0.224316	0.867133
cg15036874	MAPK11	5600	22	50705948	-3.63724	0.000312387	0.0419855	-1.06258	0.288648	0.910599
cg17962547	GPR123	84435	10	134918974	-3.63575	0.00031414	0.0421813	-0.443744	0.65748	0.99384
cg04763519		0	6	1619094	-3.63272	0.000317721	0.0426219	NA	NA	NA
cg00277753	GPR123	84435	10	134918927	-3.63072	0.000320119	0.0429032	-0.443744	0.65748	0.99384
cg03775991		0	6	170589530	-3.63037	0.000320544	0.0429197	NA	NA	NA
cg20141160	SLC45A1	50651	1	8395535	-3.63028	0.000320643	0.0428926	-1.17425	0.241028	0.87816
cg18501409	ADARB1	104	21	46553607	-3.62852	0.000322768	0.0430959	-1.56129	0.119288	0.77216
cg09826759		0	4	190284978	-3.62689	0.00032475	0.0433199	NA	NA	NA
cg23320522	LRFN1	57622	19	39805012	-3.62642	0.000325315	0.0433546	-0.896181	0.370724	0.936295
cg07523553	HCCA2;LOC402778	81532	11	1770066	-3.62633	0.000325429	0.0433292	-1.00905	0.313592	0.921823
cg09344041		0	6	1515524	-3.62603	0.000325793	0.0433372	NA	NA	NA
cg04466963		0	2	240612342	-3.62499	0.000327057	0.0434647	NA	NA	NA
cg19529709	TOP1P2;PIWIL3	7152	22	25160075	-3.62472	0.000327392	0.0434686	0.0374252	0.970166	0.991793
cg07838106	AKR7A3	22977	1	19615443	-3.62446	0.000327715	0.043471	0.0542427	0.95677	0.996613
cg27258551	SCNN1G	6340	16	23197740	-3.62327	0.000329169	0.0436232	-0.790449	0.429759	0.956469
cg18359371	SSC5D	284297	19	56005199	-3.62127	0.000331646	0.0439105	-2.10943	0.0355612	0.567341
cg22974228	ALX4	60529	11	44332685	-3.62109	0.000331865	0.0438987	-0.288273	0.773295	1.00677
cg07862423	PPAP2A;RNF138P1	8611	5	54826611	-3.62069	0.000332372	0.0439249	-0.236838	0.81291	1.00679
cg14368592	CHRNA4	1137	20	61981657	-3.6206	0.000332476	0.0438979	-0.306799	0.759165	1.00611
cg23448348	RBP1	5947	3	139257907	-3.62021	0.000332969	0.0439223	0.458667	0.646736	0.99231
cg14555543	BRUNOL5	60680	19	3228974	-3.61919	0.000334234	0.0440483	-0.864818	0.387685	0.943197
cg13947830	MIB2	142678	1	1551964	-3.61707	0.000336891	0.0443574	0.666759	0.505331	0.969444
cg25509732	PITPNM2	57605	12	123481891	-3.61458	0.000340048	0.0447317	-0.663915	0.507147	0.970333
cg09267483	BTBD17	388419	17	72353512	-3.61343	0.000341502	0.0448815	2.07494	0.0386649	0.585247
cg01681072	PDE6B	5158	4	652751	-3.61301	0.000342043	0.0449111	-1.15294	0.24966	0.883952
cg08571821	SLC12A4	6560	16	68003649	-3.61256	0.000342618	0.0449452	-1.99909	0.0463107	0.601291
cg08312369	CDKN2D	1032	19	10679775	-3.61039	0.000345404	0.0452689	-1.19506	0.232809	0.875038
cg02278319	SOLH	6650	16	596009	-3.60938	0.000346709	0.0453981	1.52271	0.128664	0.780769
cg02881570	NGB	58157	14	77737495	-3.60795	0.000348558	0.0455983	-0.568465	0.570055	0.980907
cg07919443		0	10	102419409	-3.60769	0.000348896	0.0456006	NA	NA	NA
cg17631429	FOXS1	2307	20	30433233	-3.60746	0.0003492	0.0455985	1.24274	0.214731	0.860723
cg16086620	CHGA	1113	14	93389557	-3.60691	0.000349911	0.0456494	2.71395	0.00695151	0.30823
cg14239111	KCNT1	57582	9	138660998	-3.60681	0.00035005	0.0456257	0.807558	0.41985	0.949996
cg06479512	PNLDC1	154197	6	160221164	-3.60485	0.000352614	0.0458759	3.565	0.000410246	0.0601475
cg22234712		0	8	96085385	-3.60414	0.000353547	0.0459553	NA	NA	NA
cg10016175	MGC23284;SNAI3	0	16	88747919	-3.6037	0.000354129	0.045989	NA	NA	NA
cg04017533	ST8SIA3	51046	18	55020099	-3.60305	0.000354983	0.0460578	-0.654812	0.512985	0.971416
cg11354105	DNMT3A	1788	2	25475805	-3.60284	0.000355259	0.0460517	1.65424	0.0989051	0.738242
cg08236766		0	11	46164652	-3.60217	0.000356154	0.0461257	NA	NA	NA
cg01727145	SPEG	10290	2	220313422	-3.60169	0.000356791	0.0461662	-0.781415	0.435045	0.958149
cg20575761	OTX2	5015	14	57275166	-3.59969	0.000359455	0.0464686	1.22617	0.220892	0.865725
cg17789138	SLC17A7	57030	19	49936880	-3.59925	0.000360037	0.0465016	-0.914281	0.361149	0.932276
cg00138101	HIC1	3090	17	1961109	-3.59878	0.000360671	0.0465413	-1.31518	0.189242	0.838358
cg04446876	TAF4	6874	20	60630424	-3.59852	0.000361018	0.0465439	1.50469	0.133235	0.786873
cg24536529	RLTPR	146206	16	67683016	-3.59817	0.000361495	0.0465632	-1.51731	0.130019	0.780738
cg01374266	WNT7A	7476	3	13895994	-3.59748	0.000362417	0.0466397	-0.63253	0.527421	0.971461
cg24433189	SSTR5;LOC146336	6755	16	1128689	-3.59535	0.0003653	0.0469683	-0.689621	0.490854	0.966028
cg19567689		0	14	97059467	-3.59406	0.000367057	0.0471516	NA	NA	NA
cg15971953		0	7	1447698	-3.59368	0.00036757	0.0471749	NA	NA	NA
cg05864140	RESP18	389075	2	220196530	-3.59352	0.000367788	0.0471604	-0.124353	0.901101	1.00391
cg15966747		0	10	102322694	-3.59313	0.000368334	0.0471879	NA	NA	NA
cg19384073		0	2	242766412	-3.59244	0.000369278	0.0472663	NA	NA	NA
cg02860797	OGG1	4968	3	9791144	-3.59184	0.000370097	0.0473285	-0.0152386	0.98785	0.997434
cg13106389	RUNX3	864	1	25257626	-3.5908	0.000371532	0.0474694	-2.84388	0.00469778	0.250956
cg03306082		0	4	3873127	-3.58991	0.000372756	0.0475404	NA	NA	NA
cg03947814	KCNQ1DN	55539	11	2890419	-3.58953	0.000373292	0.0475662	-0.297274	0.76642	1.00788
cg02154345		0	12	115104983	-3.58946	0.000373379	0.0475347	NA	NA	NA
cg01031441	C12orf56	115749	12	64784663	-3.58912	0.000373849	0.047552	1.28118	0.200913	0.850301
cg01098939	AMZ1	155185	7	2742274	-3.58881	0.00037429	0.0475656	-1.15037	0.250713	0.885341
cg02231404	SOX18	54345	20	62679635	-3.58741	0.000376232	0.0477697	-0.386795	0.699124	1.00176
cg26846409	GFRA2	2675	8	21640304	-3.58666	0.000377278	0.0478598	-1.48847	0.137455	0.791776
cg20168412		0	3	13324132	-3.58651	0.00037749	0.0478441	NA	NA	NA
cg00486340	MSX1	4487	4	4860026	-3.58393	0.00038112	0.0482612	-1.92964	0.0543957	0.635228
cg14005211	GAD1	2571	2	171676925	-3.58367	0.000381498	0.0482661	-1.76387	0.0785571	0.68664
cg05956679	HBA2	3040	16	223408	-3.58338	0.000381906	0.0482748	0.0311985	0.975128	0.993579
cg25516803	CCK	885	3	42307519	-3.58282	0.000382699	0.0483321	-0.14219	0.887005	1.00504
cg18827332		0	12	103344506	-3.58276	0.00038278	0.0482995	NA	NA	NA
cg17053963		0	3	44063832	-3.58201	0.000383851	0.0483917	NA	NA	NA
cg00553619	FAM101B	359845	17	292816	-3.58157	0.000384478	0.0484279	-1.88305	0.0604567	0.652516
cg07479615	BRSK2	9024	11	1470155	-3.58035	0.000386221	0.0486044	-0.0608807	0.951486	0.995964
cg09429437	POLS	11044	5	6755265	-3.57945	0.000387507	0.0486802	0.116631	0.907214	1.00299
cg06175981	ACCN4	55515	2	220387980	-3.57918	0.000387886	0.0486848	0.663973	0.50711	0.970355
cg15750546	SIM2	6493	21	38080975	-3.579	0.000388154	0.0486755	-2.33197	0.0202242	0.470165
cg12819393		0	9	127240449	-3.57863	0.000388682	0.0486988	NA	NA	NA
cg10035234	SLC6A19	340024	5	1212554	-3.57813	0.000389401	0.048746	0.738014	0.460962	0.965371
cg04688828	LYNX1	66004	8	143858612	-3.57811	0.000389431	0.0487069	-0.158172	0.874405	1.00574
cg01764198		0	6	1380013	-3.57777	0.000389922	0.0487255	NA	NA	NA
cg11801727		0	1	228659093	-3.57668	0.000391504	0.0488803	NA	NA	NA
cg11228126		0	10	71338674	-3.576	0.000392481	0.0489593	NA	NA	NA
cg17213352	LAMA5	3911	20	60886007	-3.57519	0.00039367	0.0490217	-2.22797	0.0264672	0.520685
cg08860941		0	6	167633955	-3.5751	0.000393789	0.0489937	NA	NA	NA
cg20348858	EMX2;EMX2OS	2018	10	119305335	-3.57485	0.000394166	0.0489978	0.520415	0.603078	0.986836
cg18651192		0	3	125677574	-3.57431	0.000394954	0.0490529	NA	NA	NA
cg06520279	LOXHD1	125336	18	44236918	-3.57417	0.000395148	0.0490342	0.662134	0.508287	0.970295
cg22782070	ADPRHL1	113622	13	114085586	-3.57369	0.00039586	0.0490797	-0.186375	0.85225	1.00489
cg14209399	ATP2B2	491	3	10370507	-3.57288	0.000397041	0.0491833	-1.0746	0.283235	0.906913
cg02181639	NGB	58157	14	77737621	-3.57284	0.000397105	0.0491485	-0.568465	0.570055	0.980907
cg22354030	KBTBD11	9920	8	1938554	-3.57223	0.000398007	0.0492173	0.0855268	0.931888	0.999087
cg02823437	DTYMK	1841	2	242616875	-3.57157	0.000398977	0.0492944	0.528329	0.59758	0.985548
cg22299694	KANK2	25959	19	11303830	-3.57007	0.000401184	0.0495241	-0.970067	0.33263	0.921928
cg13024368	DKK3	27122	11	12030088	-3.5684	0.000403671	0.049788	-2.46276	0.0142298	0.398634
cg23429749		0	14	102050815	-3.56688	0.000405943	0.0500248	NA	NA	NA
cg16187340		0	5	134527362	-3.56664	0.000406301	0.0500256	NA	NA	NA
cg04584009	REXO1	57455	19	1826957	-3.56613	0.000407075	0.0500776	-0.411093	0.681236	0.999803
cg07185165	APLP1	333	19	36365514	-3.56547	0.000408069	0.0501133	-1.40639	0.160425	0.809827
cg00043819		0	4	185942529	-3.56463	0.000409342	0.0502263	NA	NA	NA
cg25322642	PFKL	5211	21	45742747	-3.56336	0.000411252	0.0504172	1.20013	0.230836	0.874497
cg19721787	IQCC;CCDC28B	55721	1	32670695	-3.56233	0.00041283	0.0505671	0.545952	0.585419	0.983912
cg20850873	C3orf24	115795	3	10149803	-3.56219	0.000413041	0.0505494	-0.424516	0.67143	0.996405
cg03882914	KANK3	256949	19	8398214	-3.5621	0.000413171	0.0505219	-1.02208	0.307393	0.918521
cg15262317	FZD5	7855	2	208632832	-3.56084	0.000415105	0.0507148	1.62093	0.105863	0.746878
cg14048880		0	9	139069897	-3.56074	0.00041525	0.050689	NA	NA	NA
cg01727431	SAMD11	148398	1	871057	-3.56062	0.000415442	0.050669	-3.15121	0.00175486	0.145054
cg17500202	KIF1A	547	2	241722099	-3.55992	0.000416513	0.0507561	1.37632	0.169533	0.821332
cg13316977	BEST2	54831	19	12865609	-3.55909	0.000417788	0.0508679	0.324953	0.745396	1.0045
cg03385495		0	8	49747620	-3.55787	0.000419675	0.051054	NA	NA	NA
cg09683350		0	15	89914466	-3.55769	0.000419947	0.0510435	NA	NA	NA
cg02439789	SAMD11	148398	1	871441	-3.55767	0.000419974	0.0510032	-3.15121	0.00175486	0.145054
cg14906690		0	10	76573506	-3.55568	0.000423073	0.0513357	NA	NA	NA
cg26175428	KCNG2	26251	18	77631756	-3.55452	0.000424877	0.0515107	-1.39036	0.165233	0.815248
cg14971895	GPR158;LOC100128811	57512	10	25465352	-3.55422	0.000425349	0.0515241	0.500616	0.616931	0.98833
cg08361238	PTGFRN	5738	1	117452304	-3.55362	0.000426301	0.0515955	-0.925885	0.355093	0.927732
cg11581706	CACNA2D1	781	7	82072141	-3.55344	0.000426574	0.0515846	-0.174757	0.861364	1.00542
cg26479630	BTNL9	153579	5	180486787	-3.55342	0.000426611	0.0515453	0.47385	0.635879	0.989715
cg23929809	C21orf56	84221	21	47602432	-3.55316	0.000427017	0.0515506	-2.47404	0.0137954	0.395849
cg25283841	LOC728661;CDK11B	0	1	1600982	-3.55297	0.000427317	0.0515431	NA	NA	NA
cg12895179	SCARF2	91179	22	20779482	-3.5519	0.000428998	0.0517021	-1.32967	0.184424	0.831502
cg24041556	SLC44A2	57153	19	10736059	-3.55172	0.000429291	0.0516936	-0.934068	0.350862	0.926317
cg01416521	SBK2	646643	19	56047632	-3.55027	0.000431576	0.0519248	-0.141903	0.887232	1.00507
cg15018704	ADAT3;SCAMP4	113179	19	1908132	-3.54789	0.000435373	0.0522933	0.784074	0.433485	0.957548
cg24557058	CR1L	1379	1	207818493	-3.54693	0.000436912	0.0524339	-0.835836	0.403772	0.950225
cg08856529	KCNK9	51305	8	140714586	-3.54678	0.000437164	0.0524199	1.69233	0.0914036	0.722524
cg05308317		0	14	102053958	-3.54592	0.000438548	0.0525416	NA	NA	NA
cg15694117	DIRAS1	148252	19	2717422	-3.5456	0.000439063	0.0525591	-1.91523	0.0562139	0.641541
cg11308549	LYPD4;DMRTC2	147719	19	42348902	-3.54471	0.000440496	0.0526863	-0.186797	0.851919	1.00509
[truncated: 747 more rows]

## Sheet: ESCA
								expr	expr	expr
[truncated: 281 more rows]

[truncated: 7 more sheets: HNSC, PAAD, PCPG, PRAD, SARC, SKCM, THCA]
